# Supplementary material for: A spatially anchored transcriptomic atlas of the human kidney papilla identifies significant immune injury in patients with stone disease
Source: Nat Commun. 2023 Jul 19;14:4140. doi: 10.1038/s41467-023-38975-8 (PMC10356953; doi:10.1038/s41467-023-38975-8)
Supplement: Supplementary file 1 — Supplementary Information [file 41467_2023_38975_MOESM1_ESM.pdf]

## **SUPPLEMENTARY MATERIALS**

### **MANUSCRIPT TITLE:**

A spatially anchored transcriptomic atlas of the human kidney papilla identifies significant immune injury in patients with stone disease

### **AUTHORS**

Victor Hugo Canela, William S. Bowen, Ricardo Melo Ferreira, Farooq Syed, James E. Lingeman, Angela R. Sabo, Daria Barwinska, Seth Winfree, Blue Lake, Ying-Hua Cheng, Joseph P. Gaut, Kaice A. LaFavers, Kun Zhang, Fredric L. Coe, Elaine Worcester, Sanjay Jain, Michael T. Eadon, James C. Williams, Jr., and Tarek M. El-Achkar, the Kidney Precision Medicine Project

## Supplemental Figures

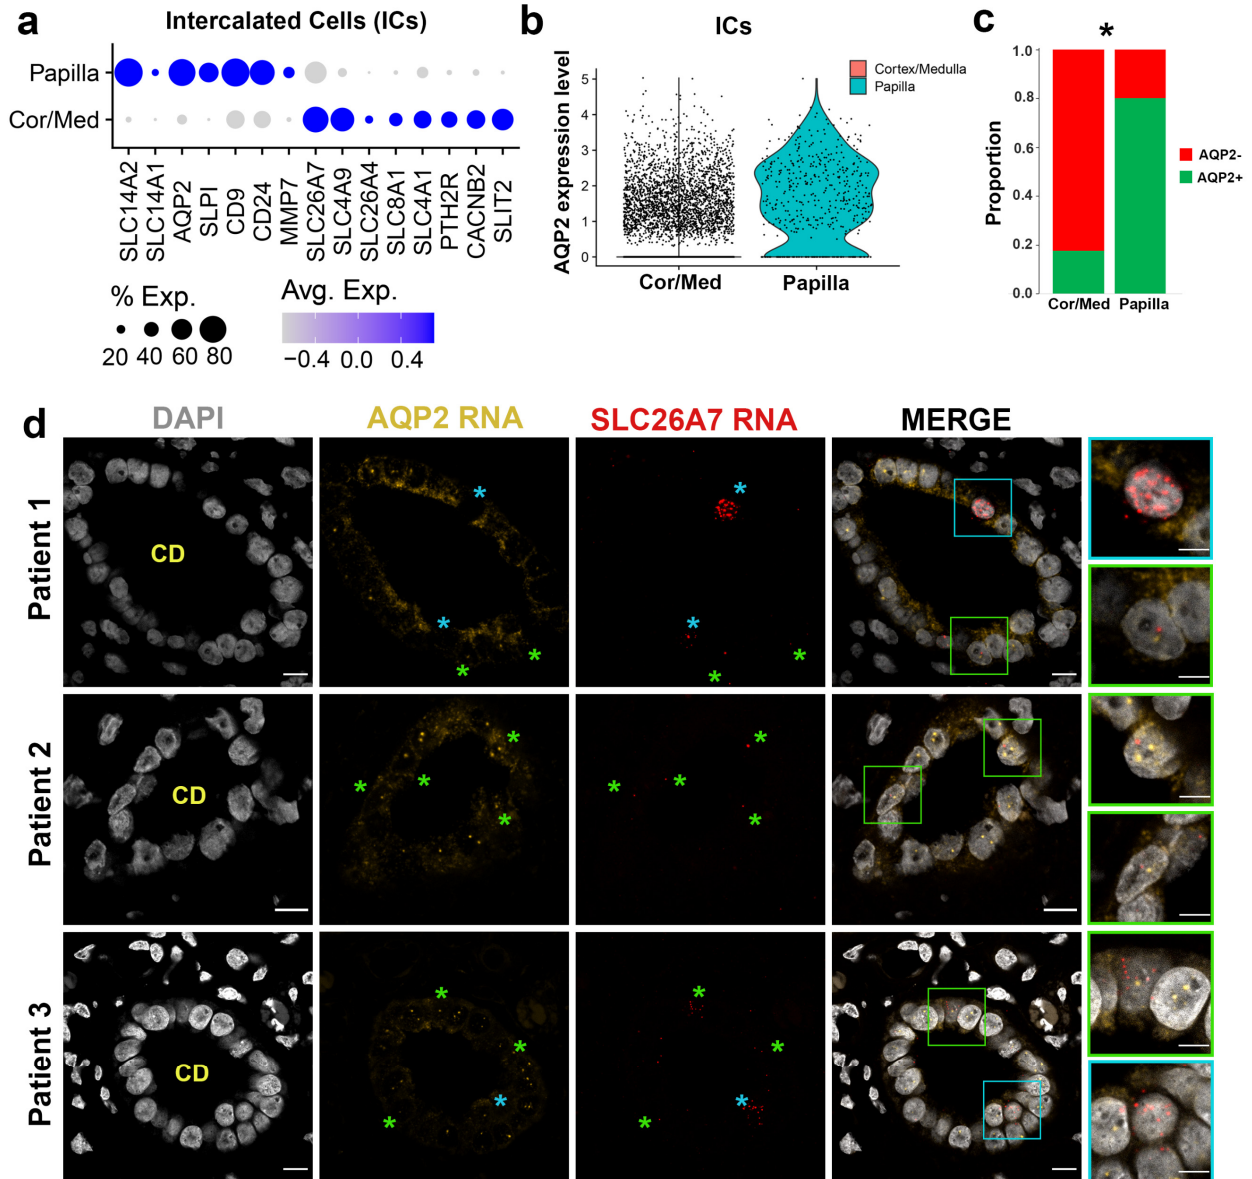

**Supplementary Fig. 1: Intercalated cells in the papilla.** (a) Differential gene expression between cortico-medullary and papillary intercalated cells based on snRNAseq (full dataset in Figure 1). Papillary intercalated cells have higher expression of AQP2 (b) than cortico-medullary ICs, and most IC cells in the papilla express AQP2 (c). Asterisk in (c) denotes statistical significance ( $p < 0.0001$ ) using two tailed Fisher's exact test comparing proportions of AQP2 negative cells in the corticomedullary vs. papillary ICs. Panels in (d) show single molecular fluorescence in situ hybridization (smFISH) for AQP2 and SLC26A7 from 3 different stone papillary biopsy patients (scale bar = 10  $\mu$ m). SLC26A7 is a chloride/bicarbonate exchanger specific to IC<sup>1</sup> and a marker for human IC cells from the atlas by Lake et al.<sup>2</sup> In the papilla, few IC collecting ducts cells express high levels of SLC26A7 with no AQP2 expression (cells

marked by blue asterisks). Many scattered collected duct cells express moderate SLC26A7 along with AQP2 (cells marked by green asterisks). The smFISH data supports that papillary IC cells frequently express AQP2 and is consistent with the snRNAseq profile of papillary ICs for the expression of AQP2 and SLC26A7 in panel (a). The boxed cells in the corresponding merge panels are enlarged in the far right (scale bars = 5  $\mu$ m in the enlarged boxes).

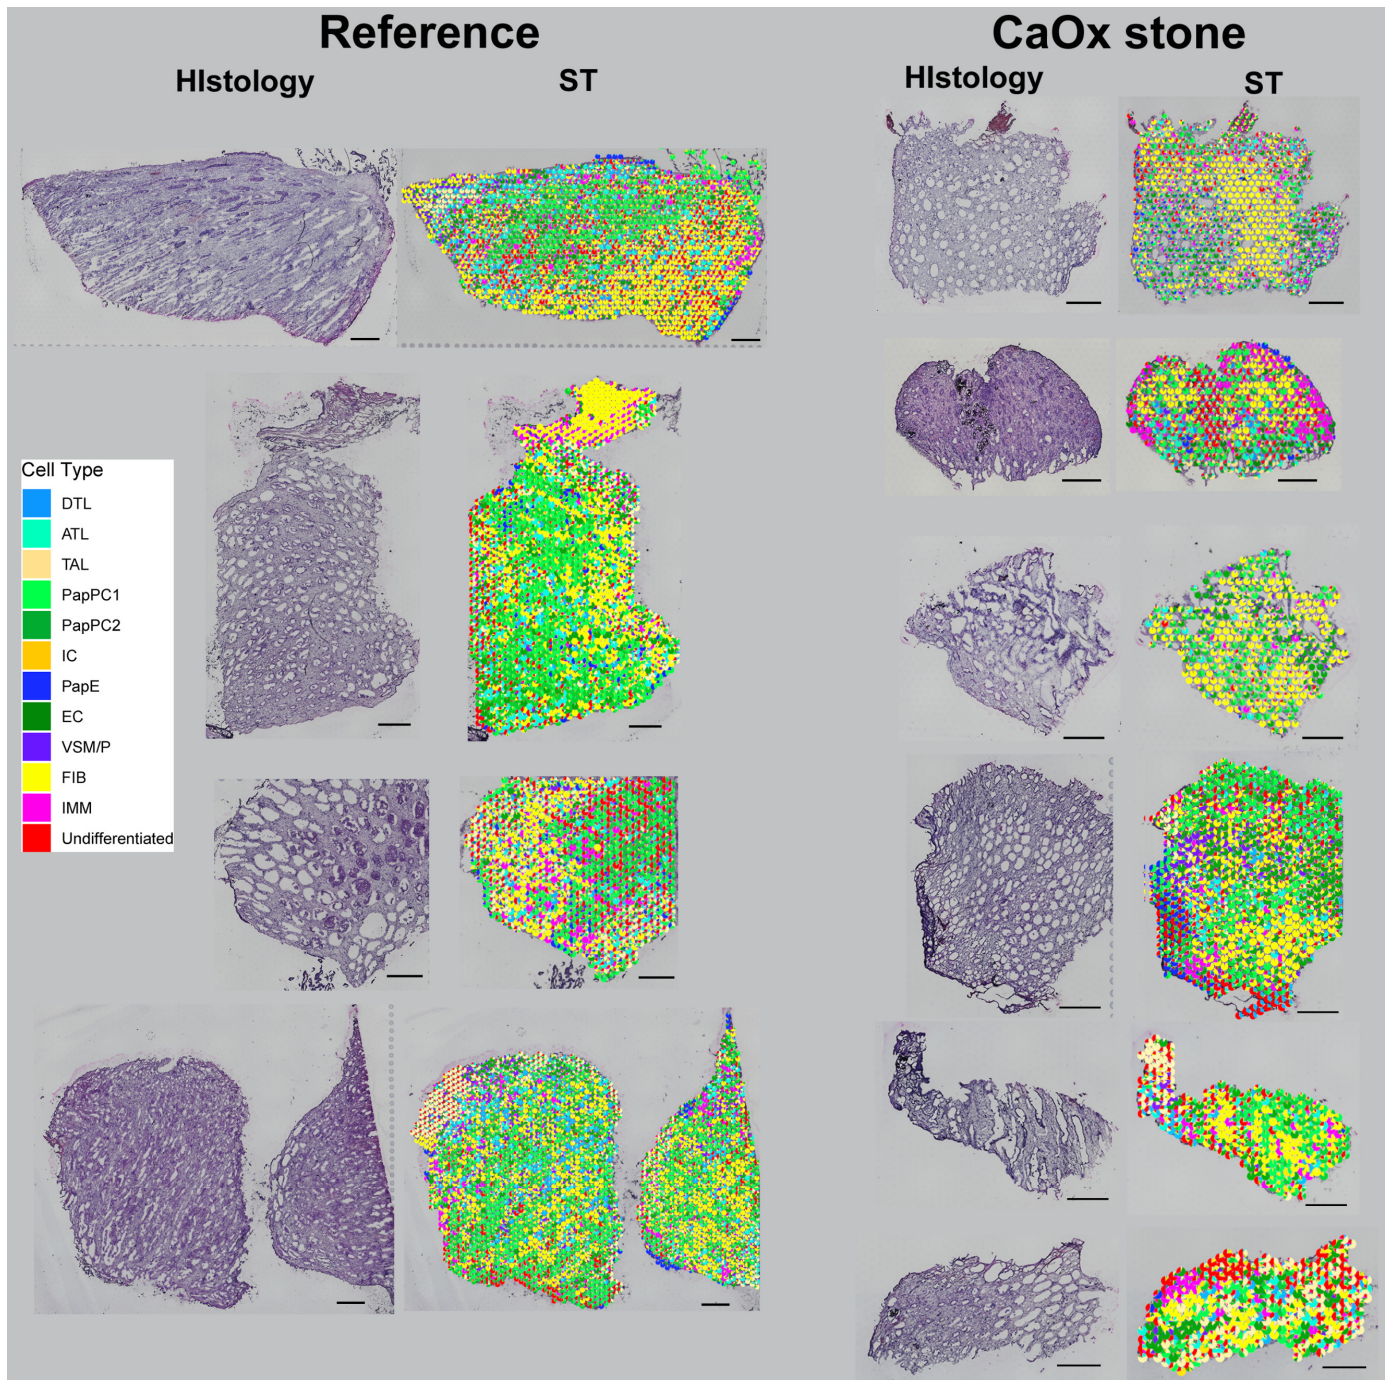

**Supplementary Fig. 2: Spatial transcriptomics atlas of the papilla from reference and stone patients-** Label transfer and mapping of the snRNAseq cell classes discussed in Figure 1 onto spatial transcriptomic spots in all papilla samples used, with underlying histology shown for each specimen (descending thin limbs- DTL; ascending thin limbs- ATL; thick ascending limbs- TAL; Papillary principal cells- Pap-PC1 and Pap-PC2; intercalated cells-IC; papillary epithelium- PapE; endothelial cells- EC; vascular smooth muscle / pericyte-VSMP; fibroblast-FIB; immune cells-IMM, undifferentiated cells). CaOx= Calcium oxalate. Scale bars = 500  $\mu$ m.

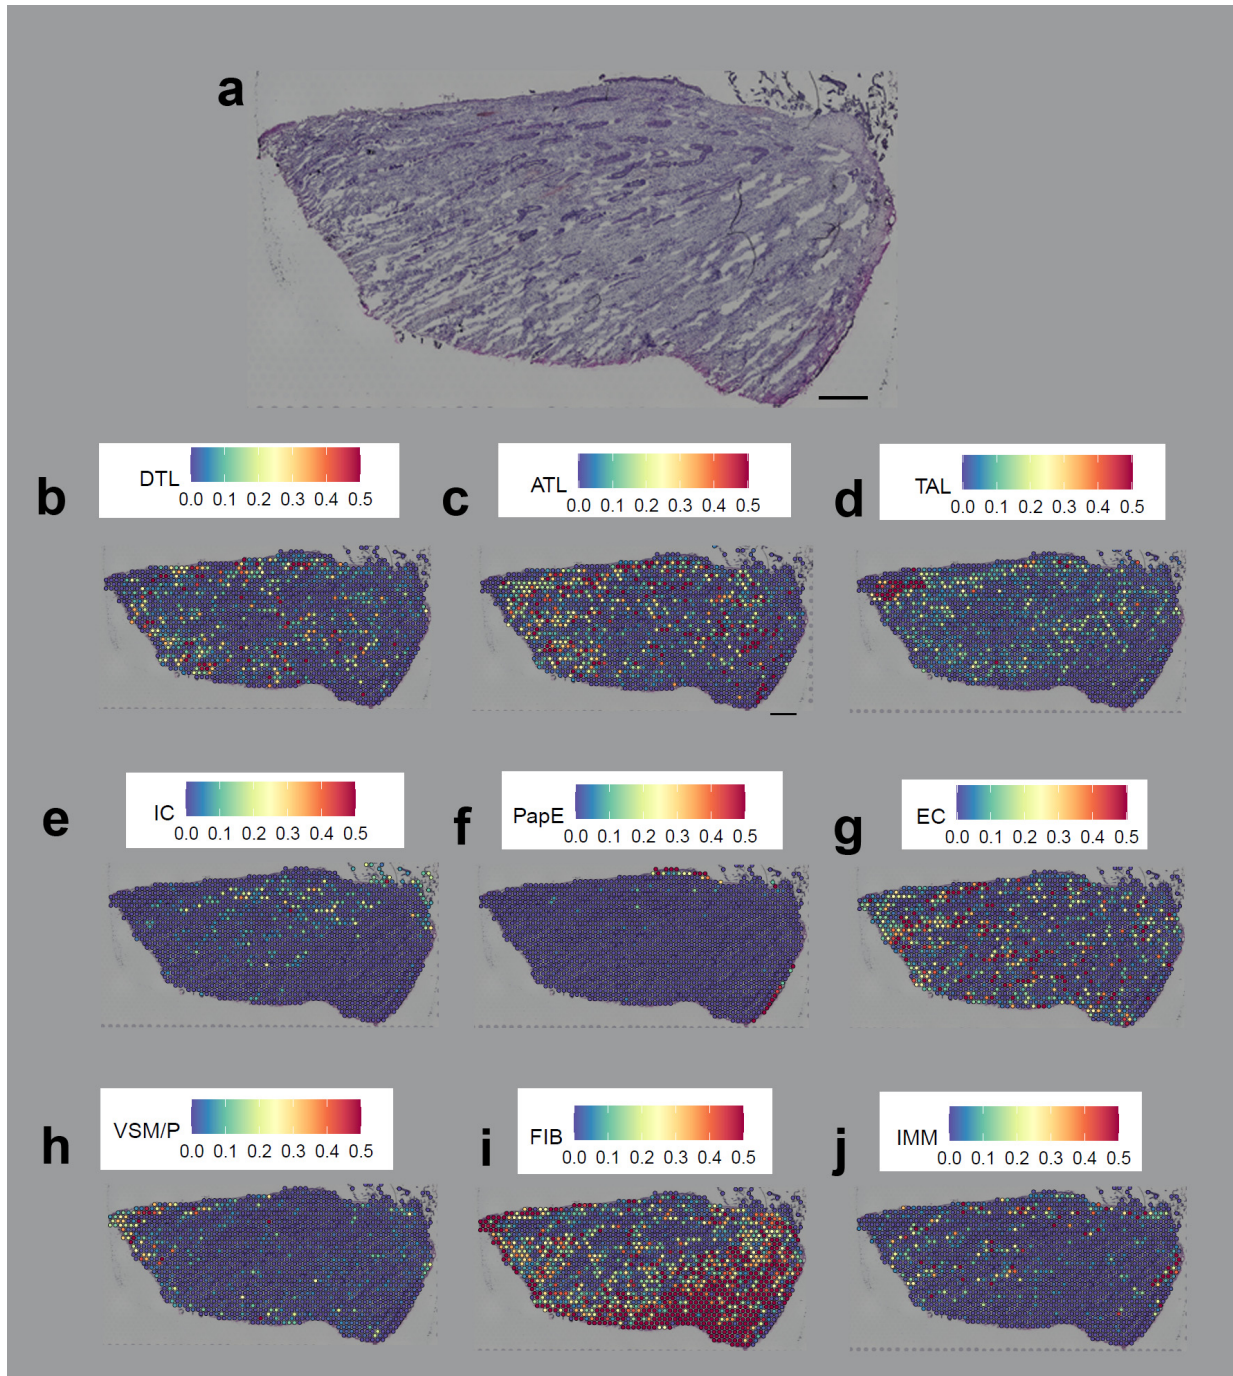

**Supplementary Fig. 3: Distribution of various cell signatures for the reference specimen shown in Figure 1.** Feature plots showing the mapping of the cell signatures in a representative reference tissue used in Figure 1. (a) shows underlying histology. (b-j) show the distribution of cell signatures indicated in the top left of each panel. See Supplementary Table 1 for list of abbreviations. Scale bars = 500  $\mu$ m.

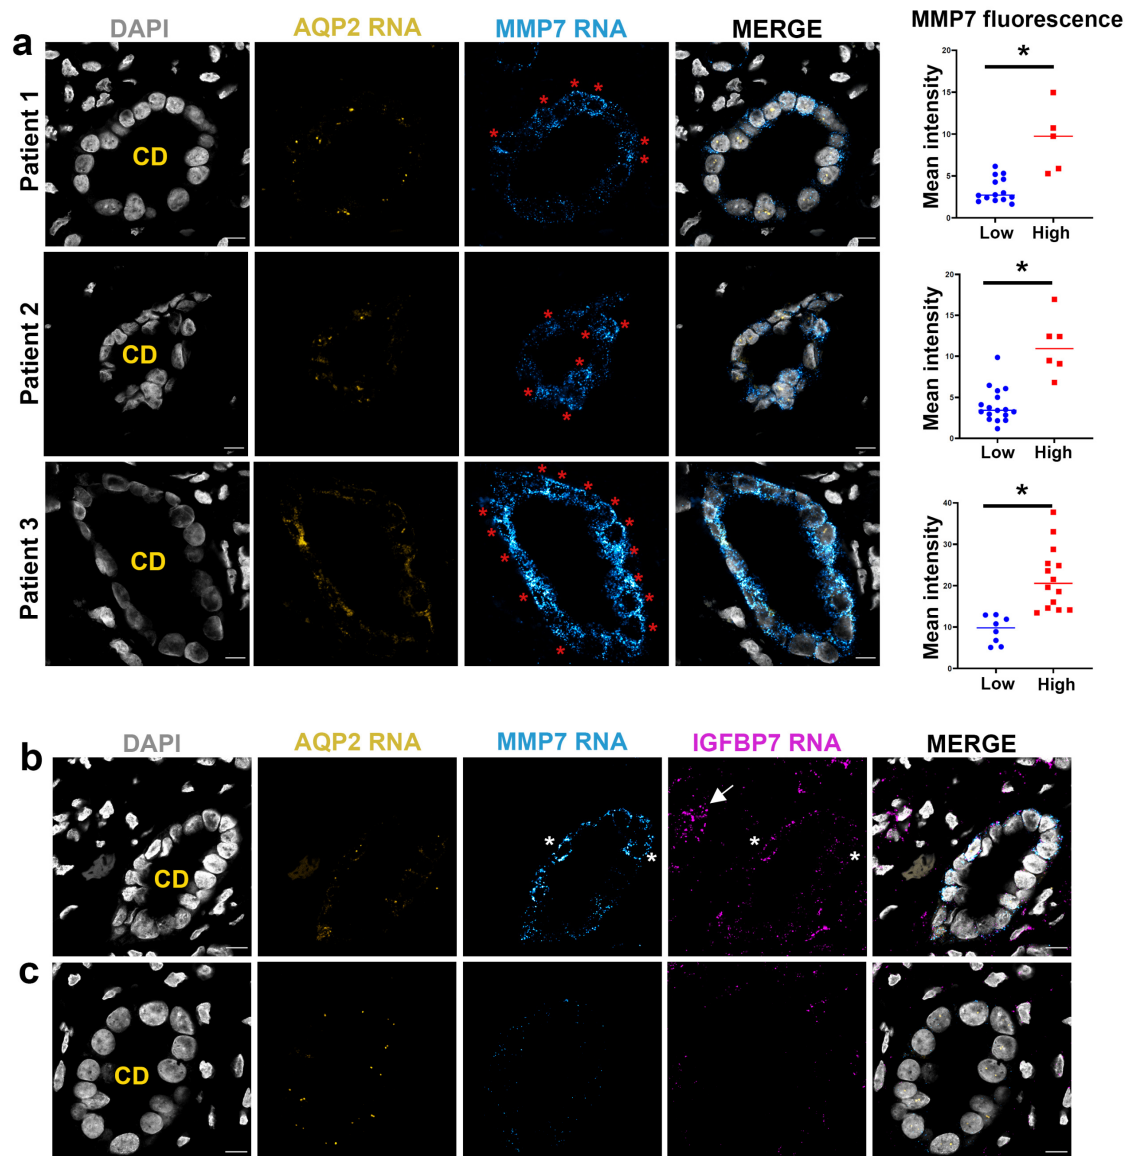

**Supplementary Fig. 4: validation of Pap-PC1 and Pap-PC2 cells using single molecular fluorescence in situ hybridization (smFISH) (extended data to Figure 1).** (a) smFISH for Aquaporin 2 (*AQP2*) and *MMP7* to distinguish PapPC1 and PapPC2 in papillary specimens from 3 different patients with Calcium oxalate stone disease. Collecting ducts (CD) are morphologically distinct and express *AQP2*. Red asterisks denote cells with high *MMP7* expression which correspond to PapPC2. The *MMP7* fluorescence associated with these cells ( $n=5$  for patient 1;  $n=6$  for patient 2;  $n=14$  for patient 3) was significantly higher than the rest of the cells ( $n=14$  for patient 1;  $n=15$  for patient 2;  $n=8$  for patient 3) in each corresponding CD (cells manually segmented and fluorescence mean intensity measured using ImageJ. (\* statistical significance by two tailed unpaired t-test performed independently for each patient ( $p=0.0001$  patient1,  $p<0.0001$  patient 2,  $p=0.0003$  patient 3)). (b) Few PapPC2 cells (white asterisks) also express *IGFBP7*, which is also consistent with data in Figure 1F. The arrow shows undifferentiated cells outside of CD with high *IGFBP7*. (c) Collecting duct from the same patient in (b) but different section, not expressing *MMP7* or *IGFBP7*, consisting mostly of PapPC1 cells. Scale bars= 10  $\mu\text{m}$ .

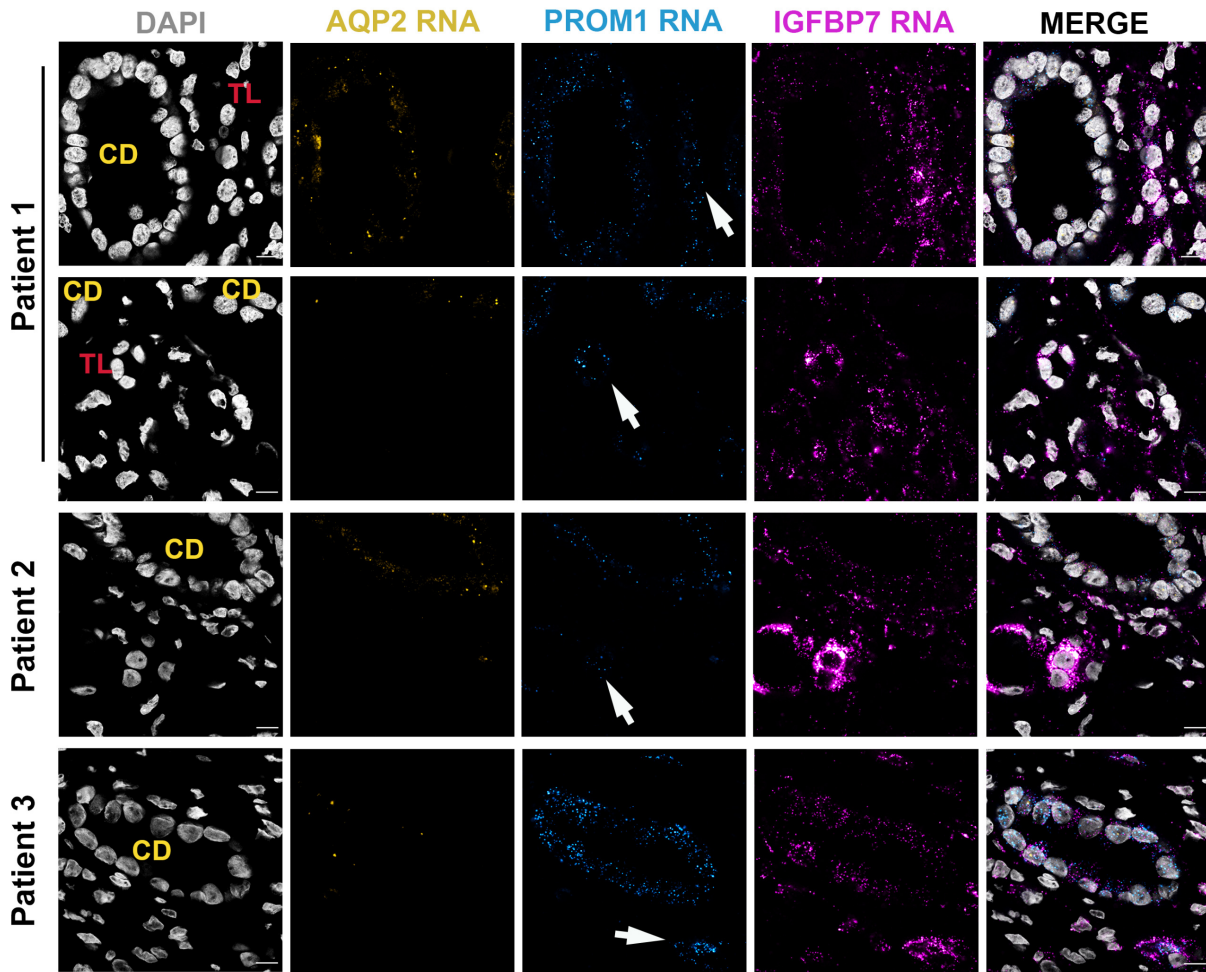

**Supplementary Fig. 5: validation of undifferentiated cells using single molecular fluorescence in situ hybridization (smFISH) (extended data to Figure 1).** smFISH for *IGFBP7* and *PROM1* was performed on papillary specimens from 3 different patients with Calcium oxalate stone disease. The images highlight undifferentiated cells with high expression of *IGFBP7* and frequently positive for *PROM1* (arrows). These cells localize to the interstitium or in cells with morphology of thin limbs (TL). Scale bars = 10  $\mu$ m.

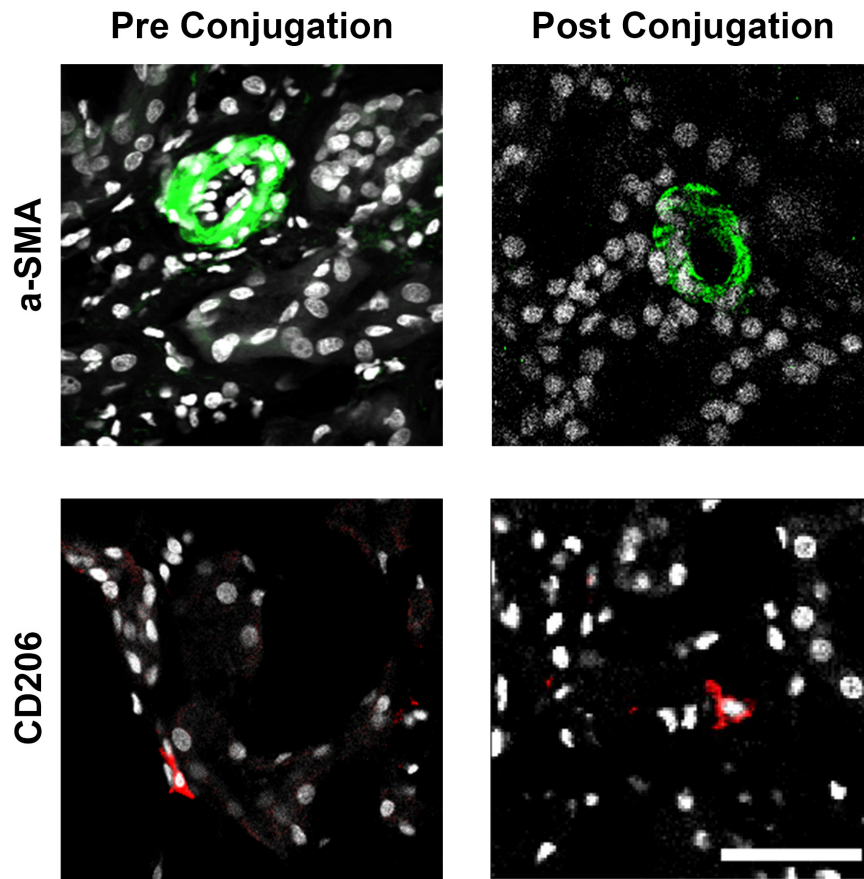

**Supplementary Fig. 6: Example of antibody validation before and after conjugation for CODEX imaging.** Examples shown here for immunofluorescence staining using antibodies against alpha smooth muscle actin (a-SMA; green), a marker of large vessels and CD206 (in red), a marker of M2 macrophages. Panels on the left represent antibody staining prior to the conjugation of these antibodies to oligonucleotides, while panels on the right represent staining with these antibodies after completed conjugation process. DAPI-stained nuclei are visualized in grey. Scale bar = 50um.

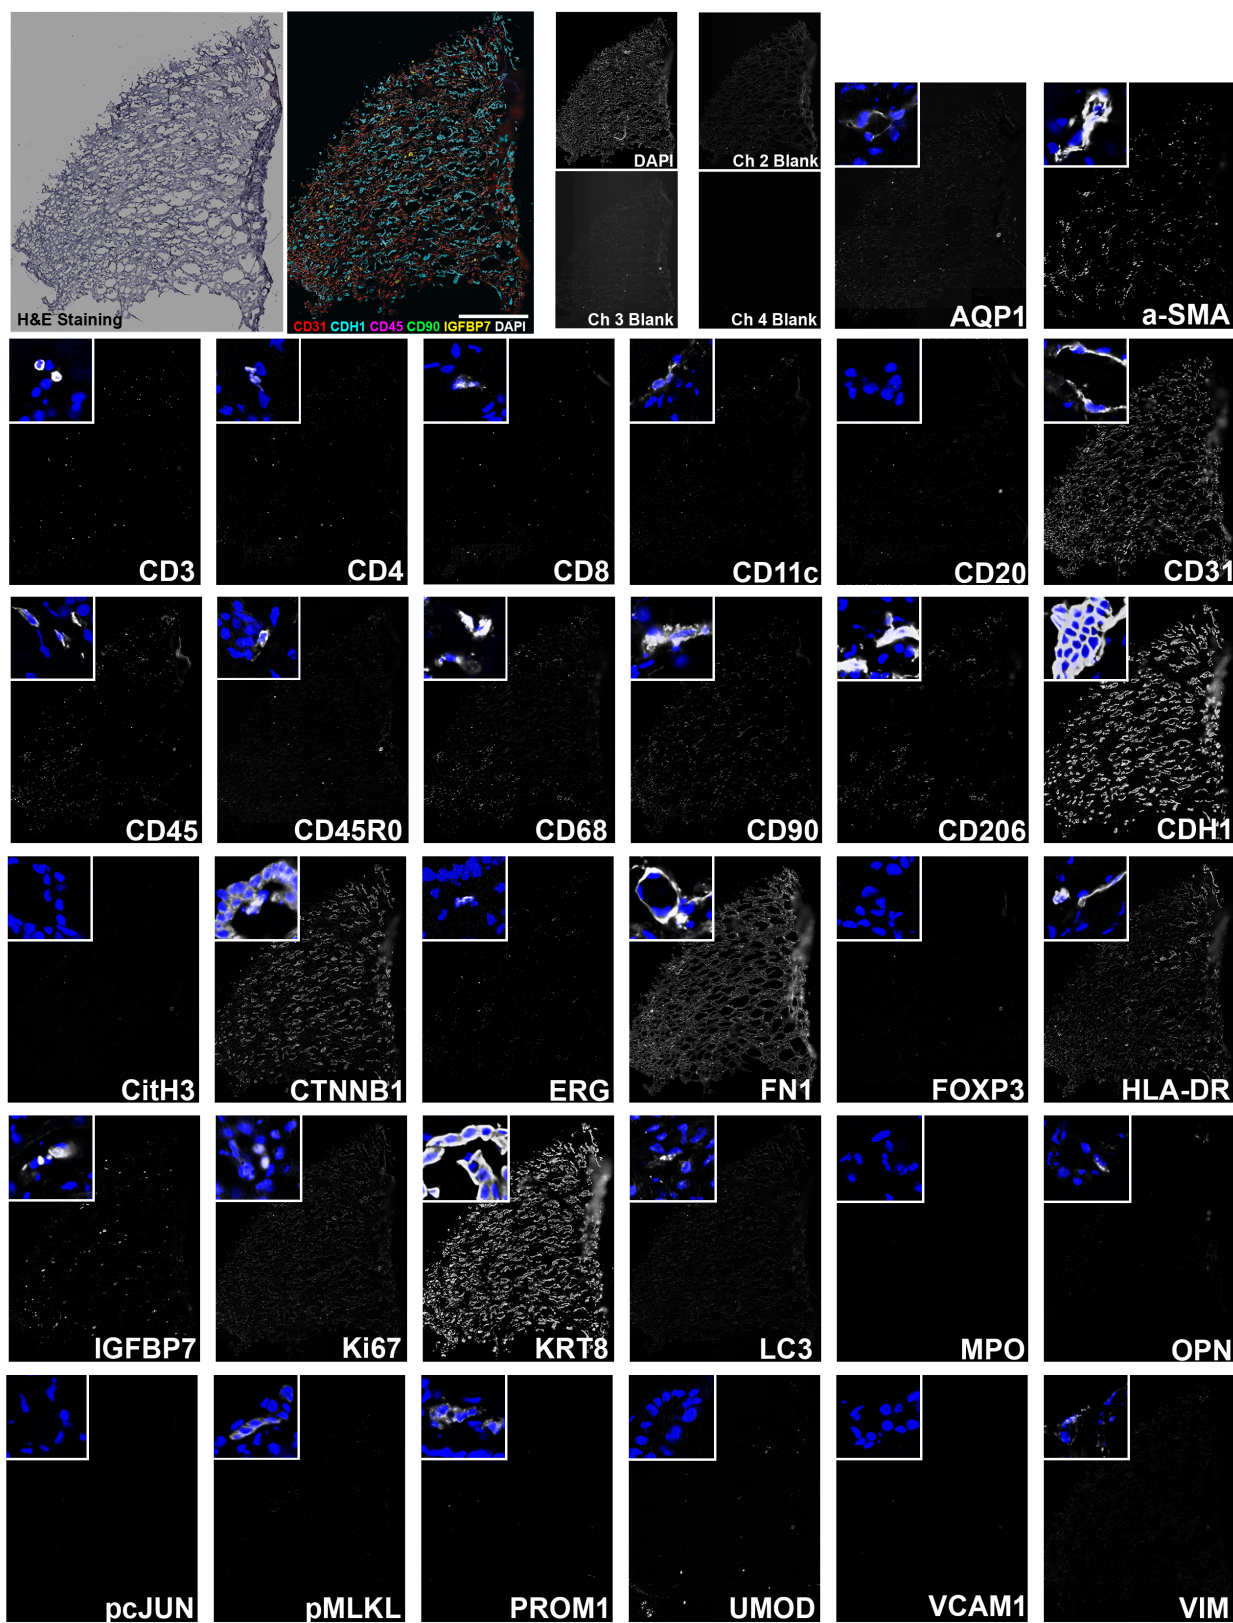

### **Supplementary Fig. 7: Quality control and cyclical staining of CODEX**

Following antibody binding, CODEX imaging goes through cycles of fluorescent probe labeling-imaging and stripping in 4 channels: DAPI- Green (channel2) red (channel 3) and far red (channel 4).

From upper left to Right: Top left panel shows H&E staining of the section that underwent CODEX staining and imaging. A representative image after CODEX is shown to its right (showing merged stains for endothelial marker CD31, distal nephron and CD marker E-cadherin (CDH1), pan leukocyte marker CD45, followed by the mesenchymal/endothelial cell marker CD90 or THY1, injurt marker IGFBP7 and DAPI for nuclei). This is followed by representative images of DAPI alone, and the blanks from channels 2, 3, and 4 that were used for background subtraction during image processing. The panels shown subsequently represent images of each of the antibodies included in the staining panel across the whole reference tissue. Insets show DAPI in blue and antibody staining in white to show staining patterns at the cellular level. Certain markers (CD20, Citrulline H3, FOXP3, MPO, pcJUN, UMOD, VCAM1) were negative in the reference tissue. Cellular level examples are still shown for these antibodies. Scale bar = 1 mm

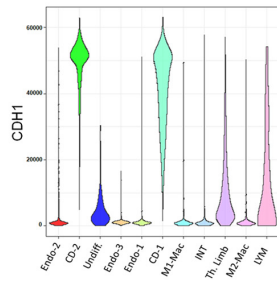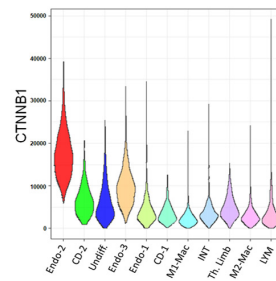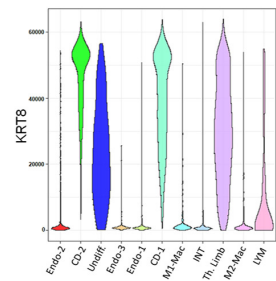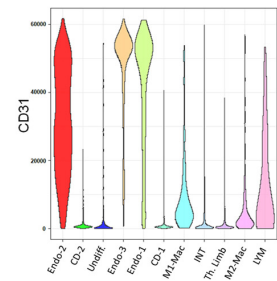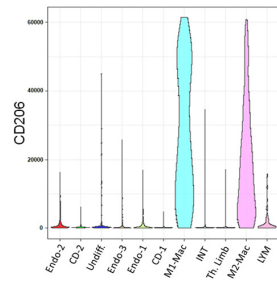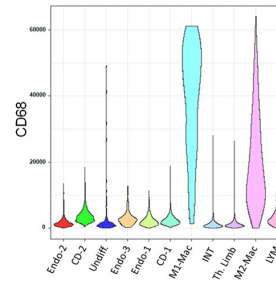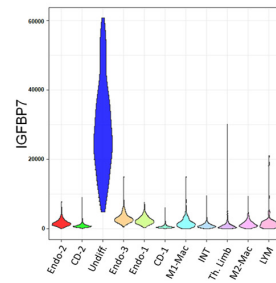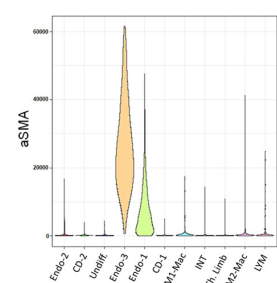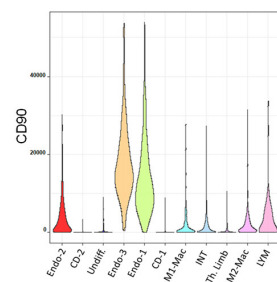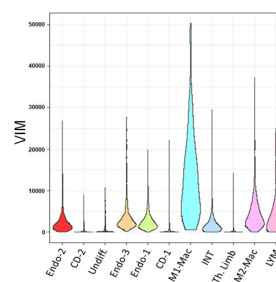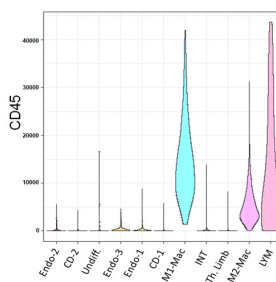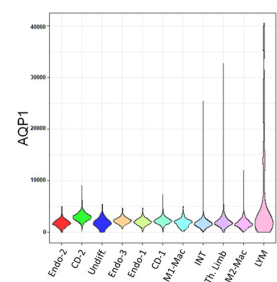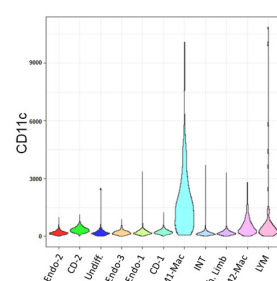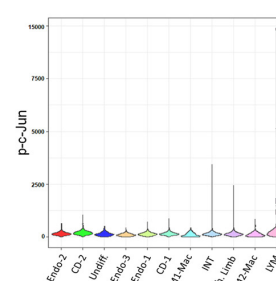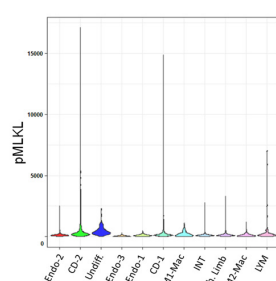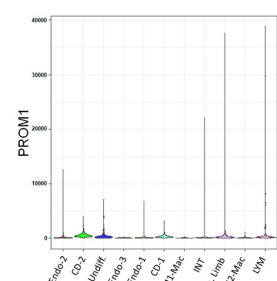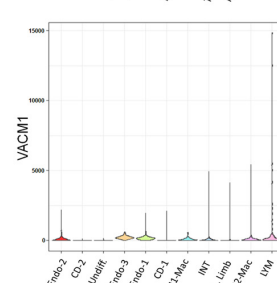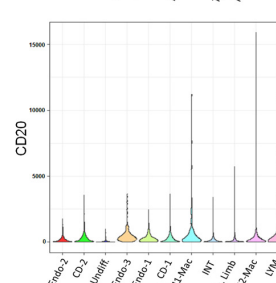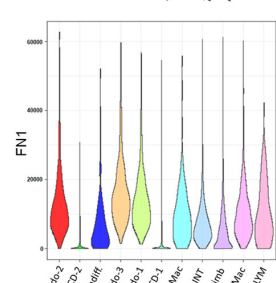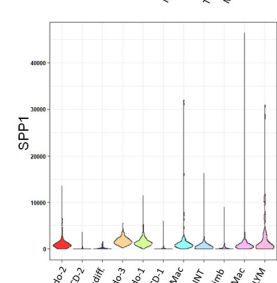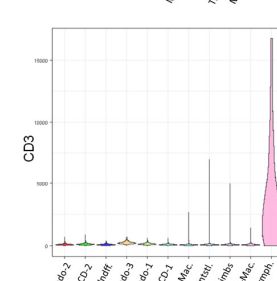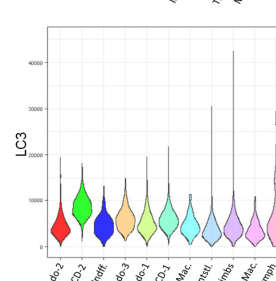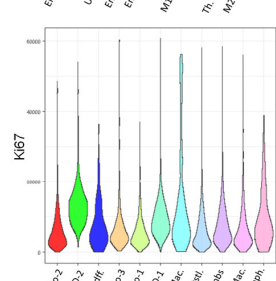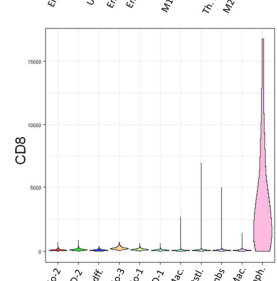

**Supplementary Fig. 8: Marker profile for the cell types identified in CODEX analysis in Figure 2**

Immunofluorescence intensity profile of the cell classes identified using unsupervised analysis in Figure 2 sorted by cell markers used in CODEX (few markers with low or no signal in the reference tissue were not included). In addition to validating the cell cluster designation based on expression profile, this visualization will also detect any potential cross talk between various markers.

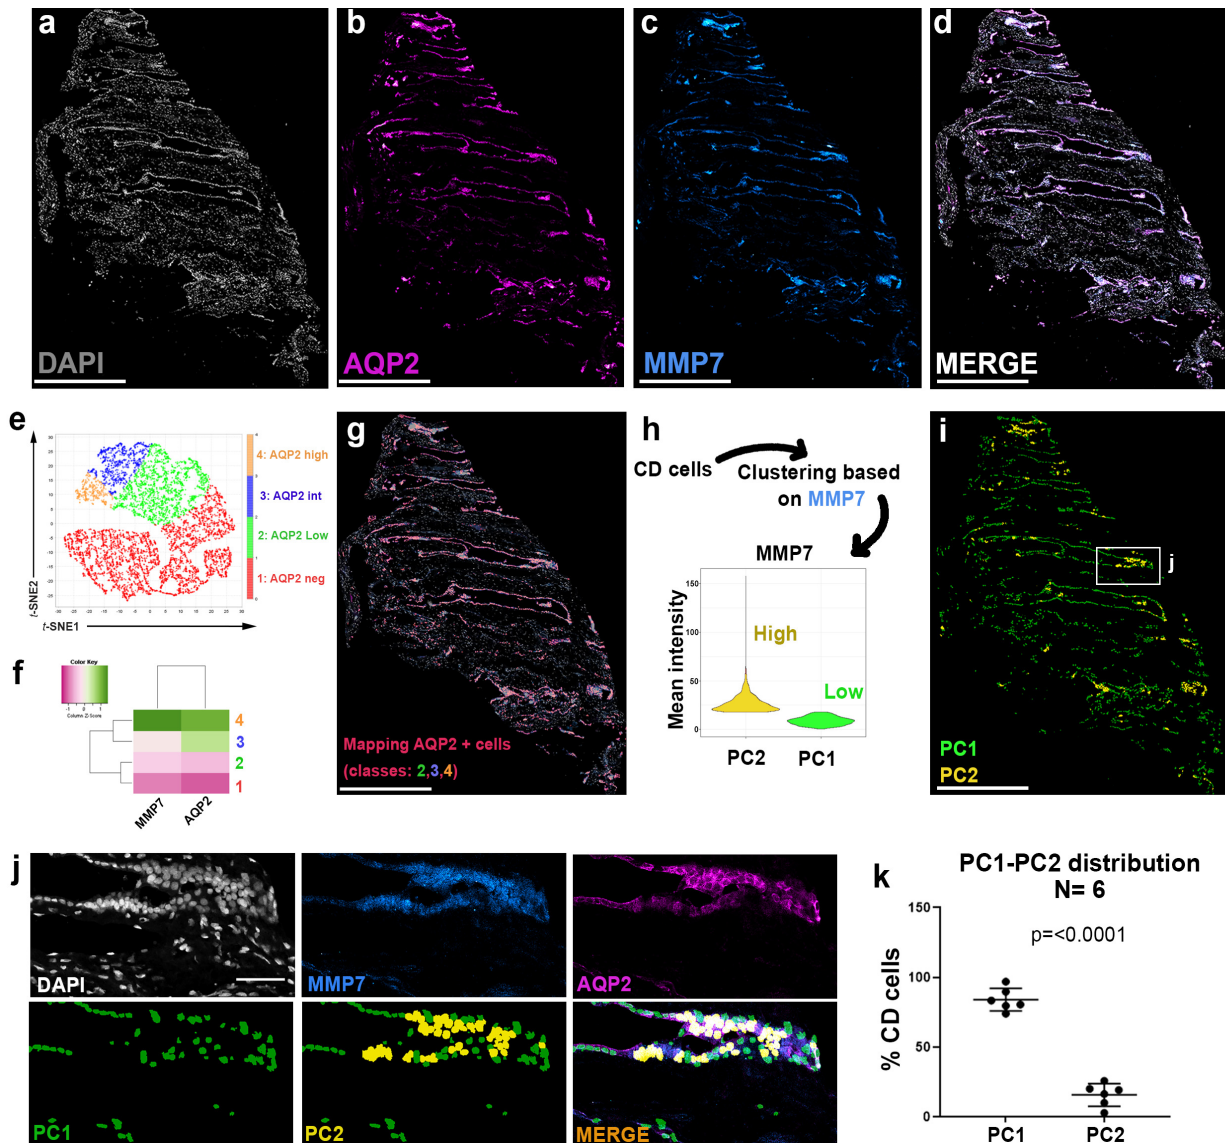

**Supplementary Fig. 9: Validation of PapPC1 and PapPC2 cells using large scale 3D imaging and tissue cytometry.** (a-d) Representative slices from a confocal immunofluorescence 3D image volume of a papillary tissue section from a patient with calcium oxalate stone disease stained with AQP2, MPP7 and DAPI. After segmentation with VTEA software, unsupervised analysis was performed based on AQP2 and MMP7 fluorescence (e-f). Collecting duct classes (AQP2+) were distributed in 3 classes based on the fluorescence intensity, and these were mapped for validation in the image volume (g), where nuclear overlays (red) of AQP2+ cells map over AQP2+ collecting ducts. CD cells with high AQP2 expression (class 4) had also high MMP7 expression (f), which is consistent with a PapC2 transcriptomic profile from Figure 1. CD cells were then re-clustered (h) using an unsupervised analysis based on MMP7 fluorescence (MMP7 high and MMP7 low classes), and these were mapped back using nuclear overlays to CDs in the image volume in (i). The boxed area in (i) is enlarged in (j),

showing the staining of AQP2 and MMP7 and the distribution of PapPC1 and PapPC2 (using nuclear overlays) within on CD. (k) Similar analysis was done on 5 other samples (n=3 reference and n=3 stone independent specimens in total), showing consistent distribution and a higher proportion of PapPC1 across samples ( $p < 0.0001$  for a difference in proportions of PapPC1 vs PapPC2 using a two tailed paired test). Scale bars in a-d, g, i = 500  $\mu\text{m}$ . Scale bar in j = 50  $\mu\text{m}$ . Mean (large bar) and standard deviation (flanking small bars) are shown for each group in (k).

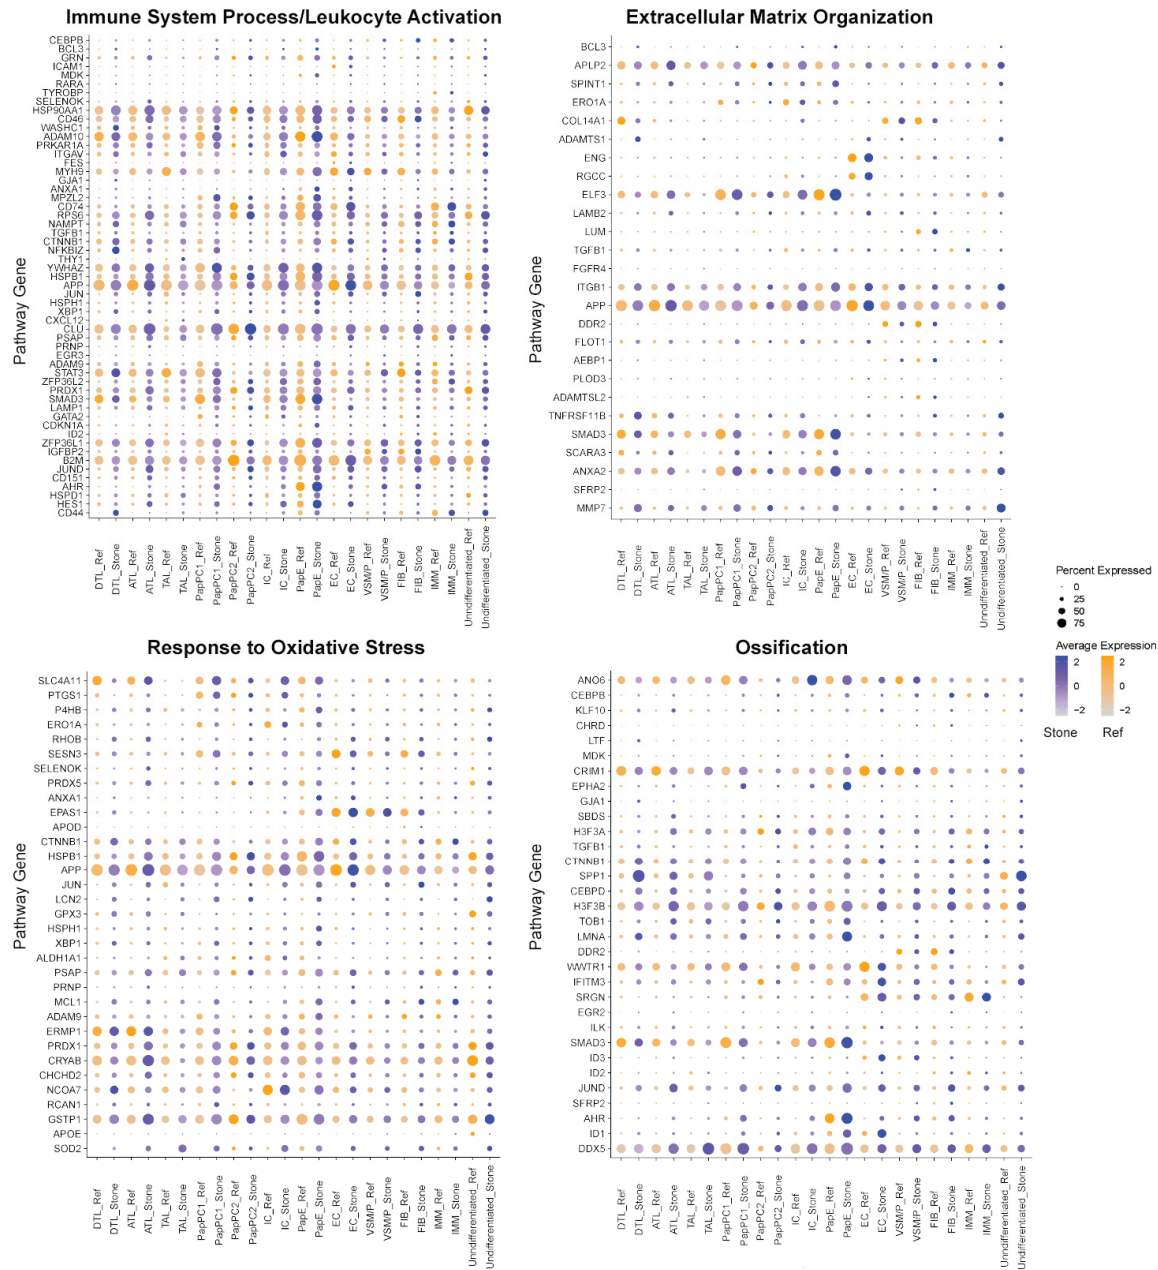

**Supplementary Fig. 10: Cell type expression of select genes from pathways enriched in stone versus reference patient papilla biopsies.** Genes in relevant pathways (Extracellular Matrix Organization-GO:0030198, Leukocyte Activation-GO:0045321, Ossification-GO:0001503 and Response to Oxidative Stress: GO:0006979) that were significantly increased in all stone biopsies as detected by snRNAseq analysis were compared by dot plot across cell types identified based on their transcriptomic signatures relative to the snRNAseq atlas. Undiff. = undifferentiated; DTL = descending thin limb; ATL = ascending thin limb; TAL = thick ascending limb; PC = principal cell; IC = intercalated cell; PapE = papillary epithelium; EC = epithelial cell; VSM/P = vascular smooth muscle cell; FIB = fibroblast; IMM = immune cell.

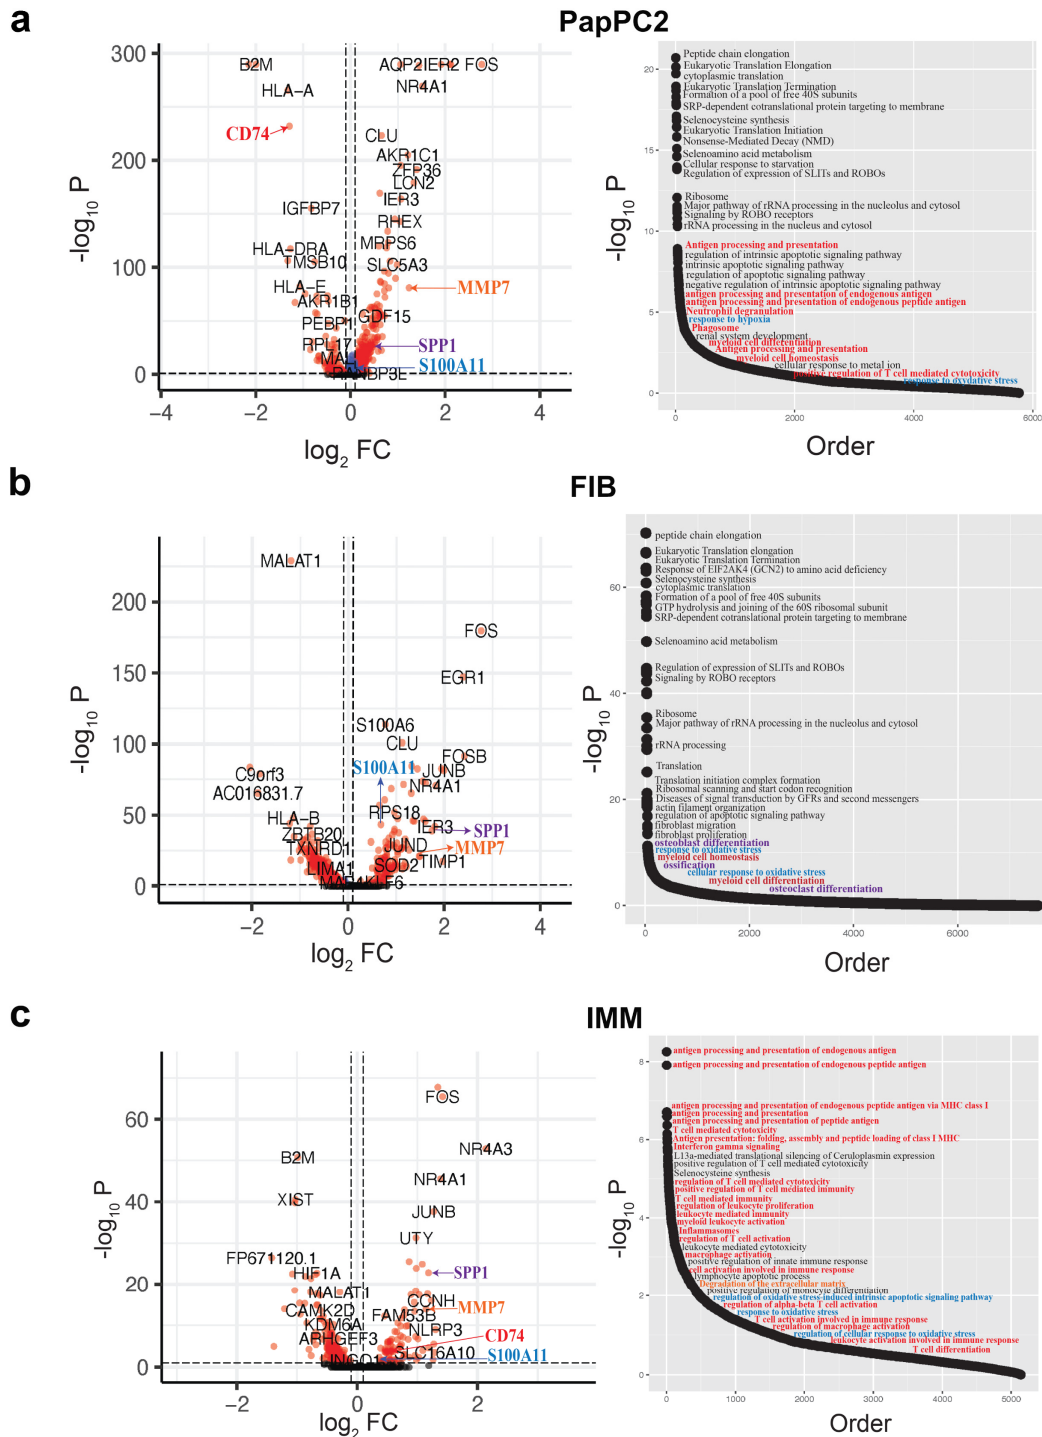

**Supplementary Fig. 11: Differentially expressed genes (DEGs) and pathways for various cell types in stone vs. reference samples (extended data for Figure 3). (a), (b) and (c) correspond to PapPC2, fibroblasts and immune cells, respectively. Two tailed Wilcoxon rank sum testing was used to define DEGs. Differentially enriched pathways were determined using overrepresentation testing, as described in methods.<sup>3, 4</sup>**

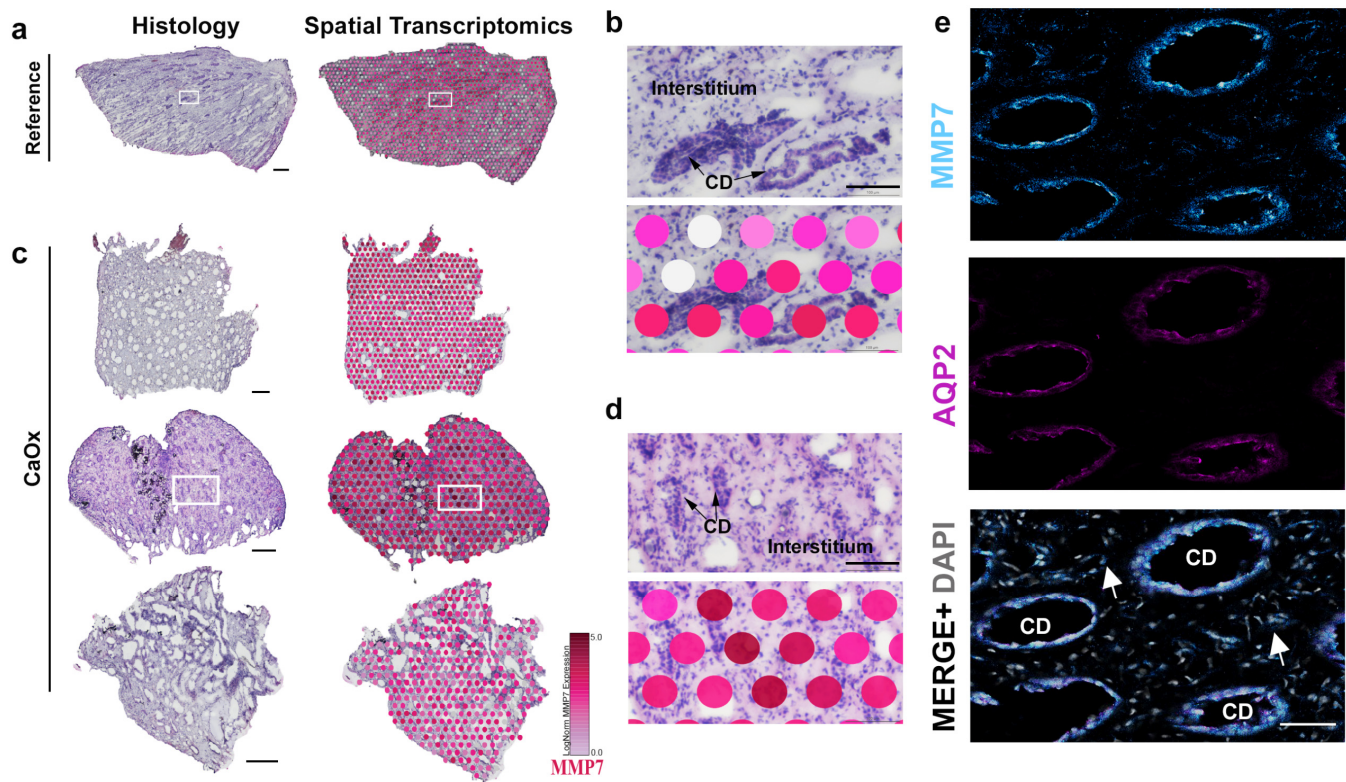

**Supplemental Figure 12: MMP7 expression in the papilla.** Spatial transcriptomics analysis comparing control (Reference) and three different CaOx stone patient biopsies. In reference tissue (a), MMP7 expression is localized predominantly to collecting ducts (CD) (b). In stone disease, MMP7 expression is diffusely increased and encompasses various papillary cells and structures, which is consistent with the snRNAseq expression and the expression signature mapping on ST (Figure 3). Scales bars in (a) and (c): 0.5 mm for reference and top stone sample, 0.25 mm for other 2 specimen; for (b) and (d): 0.1 mm. (e) Immunofluorescence confocal imaging for AQP2 and MMP7 in a papilla sample from a stone patient confirms the predominant localization of MMP7 to CDs. A less intense signal could also be detected in the surrounding interstitium (arrows). Scale bar in (e) = 10  $\mu$ m

**a**

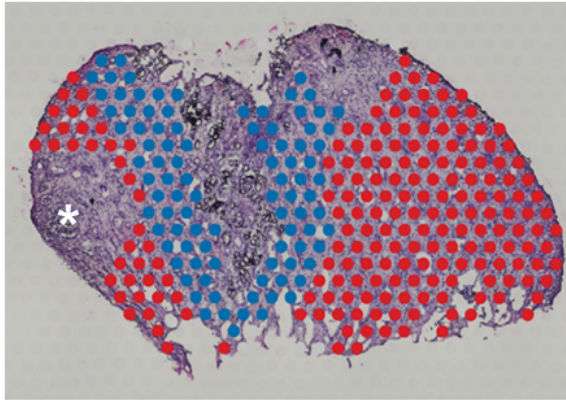

### Non-Mineralized vs. Contiguous Mineral

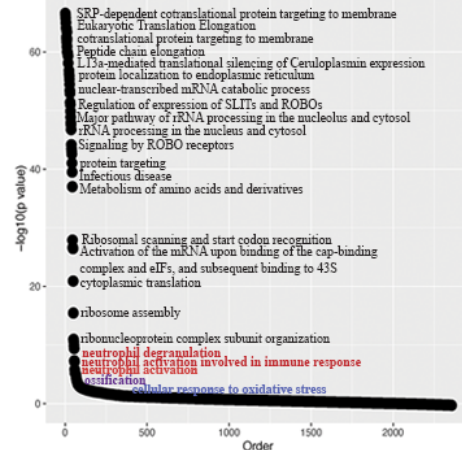

**b**

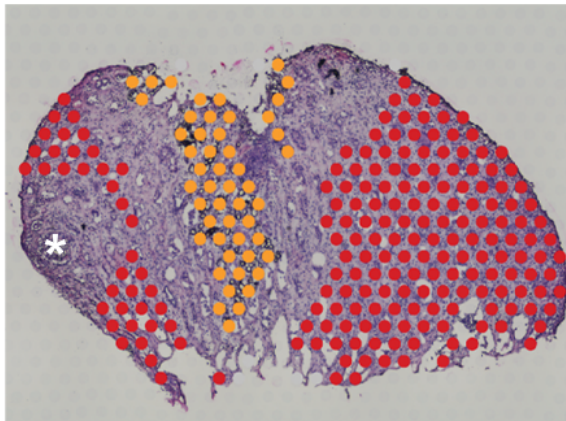

### Non-Mineralized vs. Mineralized

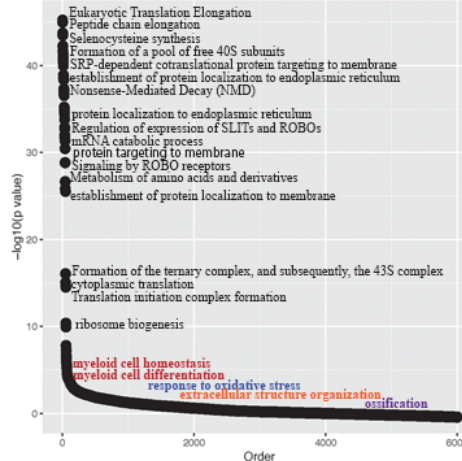

**c**

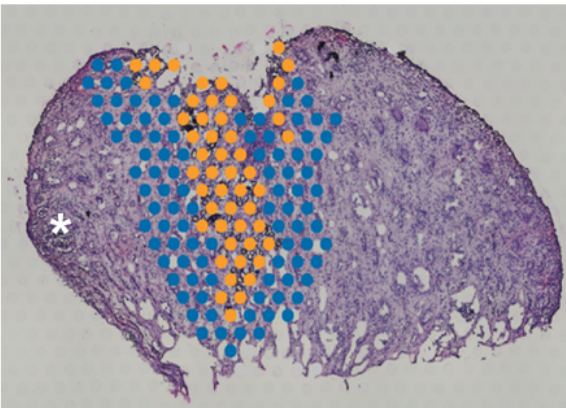

### Contiguous Mineral vs. Mineralized

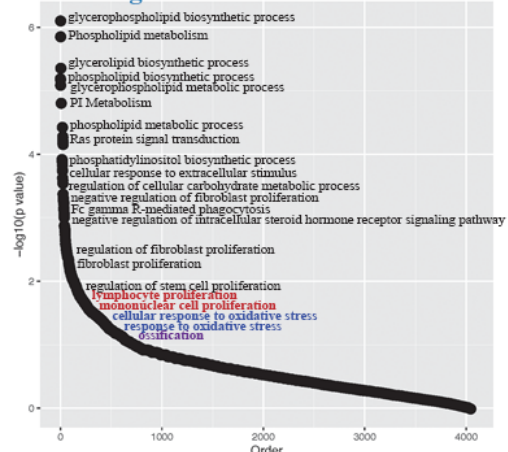

**Supplementary Fig. 13: Differentially enriched pathways based on regional analysis and spatial association with mineralization.** (a-c) correspond to various comparisons indicated in the top right. Pathways linked to myeloid activation, oxidative stress, matrix remodeling and ossification are colored in red, blue, orange and purple, respectively. Differentially enriched pathways were determined using overrepresentation testing, as described in methods.<sup>3, 4</sup>

**Supplementary Table 1- List of abbreviations**

| <b>TERM</b> | <b>MEANING</b>                        |
|-------------|---------------------------------------|
| CaOX        | Calcium oxalate                       |
| CD          | Collecting duct                       |
| IC          | Intercalated cell                     |
| PC          | Principal cell                        |
| CODEX       | Co-detection by indexing              |
| POD         | Podocyte                              |
| EC          | Endothelial cells                     |
| VSM/P       | Vascular smooth muscle/pericyte       |
| IMM         | Immune                                |
| PT          | Proximal tubule                       |
| PEC         | Parietal epithelial cell              |
| DTL         | Descending thin limb                  |
| ATL         | Ascending thin limb                   |
| DCT         | Distal convoluted tubule              |
| CNT         | Connecting tubule                     |
| PC          | Principal cell                        |
| IC          | Intercalated cell                     |
| PapE        | Papillary epithelium                  |
| EC          | Endothelial cell                      |
| FIB         | Fibroblast                            |
| NEU         | Neural cell                           |
| PapPC1      | Papillary principal cell 1            |
| PapPC2      | Papillary principal cell 2            |
| smFISH      | Small molecular in situ hybridization |
| RP          | Randall's plaque                      |
| AQP         | Aquaporin                             |
| MMP         | Matrix metalloproteinase              |

**Supplementary Table 2: Papilla biopsy usage in spatial assays and post-sequencing quality control**

| Papilla ID <sup>1</sup>      | Age Range | Sex | Tissue source | Group | snRNA seq | ST | Imaging (3D-IF, CODEX, smFISH) <sup>2</sup> | Number of spots | % Mapping to exons | % Mapping under tissue | Data availability transcriptomics               | Data Display                                  |
|------------------------------|-----------|-----|---------------|-------|-----------|----|---------------------------------------------|-----------------|--------------------|------------------------|-------------------------------------------------|-----------------------------------------------|
| <b>20-0031</b>               | 60-65     | M   | DecDon        | Ref   |           |    | 3D-IF                                       |                 |                    |                        |                                                 | Suppl. Fig 9                                  |
| <b>20-0032</b>               | 46-50     | F   | DecDon        | Ref   |           |    | 3D-IF                                       |                 |                    |                        |                                                 | Fig 3k Suppl. Fig 9                           |
| <b>20-0034</b>               | 36-40     | F   | DecDon        | Ref   |           | X  | 3D-IF                                       | 2438            | 0.92               | 0.83                   | GSE 231630                                      | Figs 1, 3l, 6, Suppl. Figs 2, 3               |
| <b>20-0045</b>               | 46-50     | M   | DecDon        | Ref   |           |    | 3D-IF                                       |                 |                    |                        |                                                 | Fig 3K Suppl. Fig 9                           |
| <b>20-0046</b>               | 46-50     | M   | DecDon        | Ref   |           | X  | 3D-IF<br>Codex                              | 2468            | 0.50               | 0.93                   | GSE 231630                                      | Figs 2, 3l Suppl. Fig 2                       |
| <b>20-0051</b>               | 56-60     | F   | DecDon        | Ref   |           | X  | 3D-IF                                       | 1386            | 0.56               | 0.36                   | GSE 231630                                      | Fig 6, Suppl. Fig 2                           |
| <b>20-0052</b>               | 61-65     | F   | DecDon        | Ref   |           | X  | 3D-IF                                       | 1376            | 0.56               | 0.45                   | GSE 231630                                      | Fig 6, Suppl. Figs 2, 9                       |
| <b>21-0053</b>               | 30-35     | F   | DecDon        | Ref   |           |    | 3D-IF                                       |                 |                    |                        |                                                 | Fig 6                                         |
| <b>K1900387</b>              | 66-70     | M   | DecDon        | Ref   | X         |    |                                             |                 |                    |                        | GSE 183279<br>HuBMAP <sup>3</sup>               | Fig 1, Fig 3                                  |
| <b>K2000094</b>              | 56-60     | F   | DecDon        | Ref   | X         |    |                                             |                 |                    |                        | GSE 183279<br>HuBMAP <sup>4</sup>               | Fig 1, Fig 3, Fig 6                           |
| <b>K2100041</b>              | 61-65     | M   | Nx            | Ref   | X         |    |                                             |                 |                    |                        | HuBMAP <sup>5</sup>                             | Fig 1, Fig 3                                  |
| <b>K2100055</b>              | 61-65     | F   | Nx            | Ref   | X         |    |                                             |                 |                    |                        | HuBMAP <sup>6</sup>                             | Fig 1, Fig 3                                  |
| <b>K2100223</b>              | 56-60     | F   | Nx            | Ref   | X         |    |                                             |                 |                    |                        | HuBMAP <sup>7</sup>                             | Fig 1, Fig 3                                  |
| <b>KRP428</b>                | 51-55     | F   | Biopsy        | CaOx  |           | X  | 3D-IF<br>Codex                              | 817             | 0.53               | 0.53                   | GSE 231630                                      | Fig 3E-H, Fig 3l, Fig4, Fig 5, Suppl. Fig 2   |
| <b>KRP429</b>                | 36-40     | M   | Biopsy        | CaOx  | X         | X  | 3D-IF                                       | 1085            | 0.82               | 0.79                   | GSE 231630                                      | Figs 1, 3A-B, 3l, 6, Suppl. Fig 2             |
| <b>KRP436</b>                | 41-45     | M   | Biopsy        | CaOx  |           |    | 3D-IF                                       |                 |                    |                        |                                                 | Fig 6                                         |
| <b>KRP449</b>                | 61-65     | F   | Biopsy        | CaOx  |           | X  | smFISH                                      | 939             | 0.86               | 0.75                   | GSE 231630                                      | Fig 3l, Suppl. Figs 1D, 2, 5                  |
| <b>KRP446</b>                | 26-30     | M   | Biopsy        | CaOx  | X         | X  | 3D-IF<br>smFISH                             | 656             | 0.49               | 0.49                   | GSE 183279<br>HuBMAP <sup>8</sup>               | Fig 1P, Fig 3l, Suppl. Figs 1D 4A, 4B-C, 5, 9 |
| <b>KRP460</b>                | 61-65     | F   | Biopsy        | CaOx  | X         |    |                                             |                 |                    |                        | GSE 231630<br>GSE 183279<br>HuBMAP <sup>9</sup> | Fig 1, Fig 3                                  |
| <b>KRP462</b>                | 66-70     | F   | Biopsy        | CaOx  | X         | X  | 3D-IF<br>smFISH                             | 262             | 0.58               | 0.34                   | GSE 183279<br>HuBMAP <sup>10</sup>              | Fig 1, Fig 3A-B, Fig 3l, Suppl. Figs 4A, 5, 9 |
| <b>KRP 463</b>               | 31-35     | F   | Biopsy        | CaOx  |           |    | smFISH                                      |                 |                    |                        | GSE 231630                                      | Fig 3l, Suppl. Figs 1D, 4A                    |
| <b>KRP473</b>                | 51-55     | M   | Biopsy        | CaOx  | X         |    |                                             |                 |                    |                        | GSE 231630                                      | Fig 1, Fig 3                                  |
| <b>KRP475</b>                | 61-65     | F   | Biopsy        | CaOx  |           | X  | 3D-IF                                       | 229             | 0.58               | 0.12                   | GSE 231630                                      | Fig 3l, Suppl. Figs 2, 9                      |
| <b>KRP478</b>                |           |     | Biopsy        | CaOx  |           |    | 3D-IF                                       |                 |                    |                        |                                                 | Fig 6                                         |
| <b>K2200020<sup>11</sup></b> | 46-50     | M   | DecDon        | AKI   | X         |    |                                             |                 |                    |                        | GSE 231630                                      | Fig 1                                         |

<sup>1</sup>A medullary sample (K2100202) was added to the kidney atlas in Figure 1 and uploaded to GSE206306 for data availability. The sample was not included in the table because it is not papilla.

<sup>2</sup>All source data for imaging is available at: doi: 10.5281/zenodo.7653239: <https://zenodo.org/record/7653239#.ZGluGc7MKUk>

<sup>3-10</sup> Data available through HuBMAP at: <sup>3</sup><https://portal.hubmapconsortium.org/browse/donor/ab8258a97e0820c294d1f0ba2d261f61>.

<sup>4</sup><https://portal.hubmapconsortium.org/browse/donor/b8f375d33daa5228782abd838d851b8d>, <sup>5</sup><https://portal.hubmapconsortium.org/browse/donor/d876de578e9d8c2ce2dcd7c1bbb00681>.

<sup>6</sup><https://portal.hubmapconsortium.org/browse/donor/9d3c93a2e2d0e81b0f18dd515739a42f>, <sup>7</sup><https://portal.hubmapconsortium.org/browse/donor/dfd0352b60504b321899f738c860e3fc>.

<sup>8</sup><https://portal.hubmapconsortium.org/browse/donor/613776ac210f65a63462ce6f926f4557>, <sup>9</sup><https://portal.hubmapconsortium.org/browse/donor/5c4208e2f2715c56ee8dc82b5f1b90c0>.

<sup>10</sup><https://portal.hubmapconsortium.org/browse/donor/e742ac485a0614e4114a26886ed0b444>.

<sup>11</sup>Acute Kidney Injury papillary sample included in the cell type mapping but excluded in downstream comparisons between reference and stone papilla.

ST = spatial transcriptomics; 3D-IF = 3-dimensional immunofluorescence imaging, CODEX= codetection by Indexing, smFISH= single molecule fluorescence in situ hybridization, DecDon= Deceased donor, Nx= Tumor nephrectomy, CaOX= Calcium Oxalate stone former, Ref= Reference non-stone former, AKI= Acute Kidney Injury with Blood Urea Nitrogen above 100 mg/dl.

**Supplementary Table 3: antibodies used in CODEX assay**

| <b>Antibody</b>     | <b>Significance</b>                          | <b>Clone</b> | <b>Supplier</b> | <b>Catalog Number</b> |
|---------------------|----------------------------------------------|--------------|-----------------|-----------------------|
| Ki67                | Proliferating cells                          | B56          | Akoya           | 4250019               |
| CD3                 | Pan T cells                                  | UCHT1        | Akoya           | 4350008               |
| CD4                 | CD4+ T cells                                 | SK3          | Akoya           | 4350010               |
| CD8                 | CD8+ t cells                                 | SK1          | Akoya           | 4150004               |
| CD11c               | resident dendritic cells                     | S-HCL-3      | Akoya           | 4350012               |
| CD31                | endothelial cells                            | WM59         | Akoya           | 4250009               |
| CD20                | B cells                                      | L26          | Akoya           | 4150018               |
| CD45                | pan leukocyte markers                        | HI30         | Akoya           | 4150003               |
| CD45RO              | memory T cells                               | UCHL1        | Akoya           | 4250023               |
| HLA-DR              | antigen presenter cells                      | L243         | Akoya           | 4250006               |
| CD90 (THY1)         | PT, fibroblasts, activated endothelial cells | SE10         | Akoya           | 4150021               |
| E-cadherin (CDH1)   | Distal nephron, CD                           | 4A2C7        | Akoya           | 4250021               |
| b-catenin (CTNNB1)  | Pan tubular epithelium                       | 12F7         | Akoya           | 4450036               |
| Cytokeratin8 (KRT8) | Loop of Henle, distal nephron and CD         | TS1          | NovusBio        | NBP2-34501-0.1mg      |
| Uromodulin          | TAL                                          | Polyclonal   | R&D             | AF5144                |
| a-sma               | myofibroblast, arterioles                    | 1A4          | Invitrogen      | 14-9760-82            |
| PROM1 (CD133)       | fibrosis                                     | AC133        | Miltenyi Biotec | 130-090-422           |
| MPO                 | neutrophils                                  | Polyclonal   | Abcam           | ab9535                |
| CD68                | activated macrophages                        | KP1          | ThermoFisher    | 14-0688-82            |
| IGFBP7              | injury                                       | Polyclonal   | Acris/Origene   | AP01109PU-S           |
| p- c-Jun            | stress kinase pathway                        | D47G9        | Cell Signalling | 3270BF                |
| CD206               | M2                                           | Polyclonal   | R&D             | AF2534                |

|               |                                   |              |                  |             |
|---------------|-----------------------------------|--------------|------------------|-------------|
| SPP1          | Osteopontin /OPN                  | AKm2A1       | Santa Cruz       | sc21742     |
| ERG           | Endothelial Nuclei                | EPR3864      | Abcam            | ab92513     |
| AQP1          | PT, TDL                           | 1/22         | Santa Cruz       | sc-32737-X  |
| Citruline H3  | netosis                           | 7C10         | Acris/Origene    | AM10179PU-N |
| Vimentin      | Fibroblasts                       | RV202        | BD<br>Pharmingen | 550513      |
| FOXP3         | injury                            | 236A/E7      | Thermo Fisher    | 14-4777-82  |
| VCAM1         | non-repairing<br>epithelial cells | EPR5047      | Abcam            | ab271899    |
| Phosphor-MLKL | necroptosis                       | D6H3V (S358) | Cell Signaling   | 91689BF     |
| Fibronectin   | Injury, pre-collagen              | F1           | Abcam            | ab271831    |
| LC3           | autophagy                         | Polyclonal   | Sigma Aldrich    | L8918-25UL  |

Antibodies purchased from Akoya were conjugated by vendor. Antibodies from other vendors were conjugated in-house using Akoya conjugation kits as described in methods

**Supplementary Table 4: Clinical summary of urine donors for MMP7/9 studies.**

|                                        | <b>Normal</b><br>N= 20 | <b>Non-Active SF</b><br>N= 18 | <b>Active SF</b><br>N= 18 | <b><i>P</i></b> |
|----------------------------------------|------------------------|-------------------------------|---------------------------|-----------------|
| <b>Age</b>                             | 41 +/- 8.9             | 39 +/- 9.0                    | 47 +/- 11.9               | ns              |
| <b>Sex</b> (% male)                    | 50                     | 67                            | 40                        | ns              |
| <b>Race</b> (% white,<br>non-hispanic) | 100                    | 100                           | 100                       | ns              |
| <b>EGFR</b> (ml/min)                   | 93.2 +/- 19.7          | 98.10 +/- 18.9                | 88.9 +/- 22.8             | ns              |
| <b>Serum Creatinine</b><br>(mg/dl)     | 0.92 +/- 0.09          | 0.93 +/- 0.12                 | 1.00 +/- 0.45             | ns              |
| <b>Urine Creatinine</b><br>(mg/dl)     | 152.3 +/- 64.0         | 119.9 +/- 57.0                | 121.3 +/- 74.7            | ns              |
| <b>Diabetes</b> (%)                    | 0                      | 0                             | 5.6                       | N/A             |
| <b>HTN</b> (%)                         | 0                      | 0                             | 0                         | N/A             |
| <b>Cardiac Disease</b><br>(%)          | 0                      | 0                             | 0                         | N/A             |

Except for proportions, values represent mean  $\pm$  standard deviation. Comparisons were done using a two-tailed ANOVA.

EGFR= Estimated glomerular filtration rate

## SUPPLEMENTARY REFERENCES

1. Petrovic S, *et al.* SLC26A7: a basolateral Cl<sup>-</sup>/HCO<sub>3</sub><sup>-</sup> exchanger specific to intercalated cells of the outer medullary collecting duct. *Am J Physiol Renal Physiol* **286**, F161-169 (2004).
2. Lake BB, *et al.* An atlas of healthy and injured cell states and niches in the human kidney. *bioRxiv*, 2021.2007.2028.454201 (2021).
3. Yu G, He QY. ReactomePA: an R/Bioconductor package for reactome pathway analysis and visualization. *Mol Biosyst* **12**, 477-479 (2016).
4. Yu G, Wang LG, Han Y, He QY. clusterProfiler: an R package for comparing biological themes among gene clusters. *OMICS* **16**, 284-287 (2012).

## KPMP consortium members

| Name                     | E-mail                           | Site                            |
|--------------------------|----------------------------------|---------------------------------|
| Stewart H. Lecker        | slecker@bidmc.harvard.edu        | Beth Israel Deaconess           |
| Isaac Stillman           | istillma@caregroup.harvard.edu   | Beth Israel Deaconess           |
| Steve Bogen              | sbogen@bostoncellstandards.com   | Boston Cell Standards           |
| Afolarin A. Amodu        | Afolarin.Amodu@bmc.org           | Boston Medical Center           |
| Titlayo Ilori            | tilori1@bu.edu                   | Boston Medical Center           |
| Insa Schmidt             | Insa.Schmidt@bmc.org             | Boston Medical Center           |
| Shana Maikhor            | Shana.Maikhor@bmc.org            | Boston Medical Center           |
| Laurence H. Beck         | Laurence.Beck@bmc.org            | Boston University               |
| Joel M. Henderson        | Joel.Henderson@bmc.org           | Boston University               |
| Ingrid Onul              | Ingrid.Onul@bmc.org              | Boston University               |
| Ashish Verma             | Ashish.Verma@bmc.org             | Boston University               |
| Gearoid M. McMahon       | gmmcmahon@bwh.harvard.edu        | Brigham & Women's Hospital      |
| M. Todd Valerius         | MTVALERIUS@BWH.HARVARD.EDU       | Brigham & Women's Hospital      |
| Sushrut Waikar           | swaikar@bu.edu                   | Brigham & Women's Hospital      |
| Astrid Weins             | aweins@bwh.harvard.edu           | Brigham & Women's Hospital      |
| Mia R. Colona            | Mia.Colona@bmc.org               | Brigham & Women's Hospital      |
| Anna Greka               | agreka@broadinstitute.org        | Broad Institute                 |
| Nir Hacohen              | nhacohen@partners.org            | Broad Institute                 |
| Paul J. Hoover           | phoover@bwh.harvard.edu          | Broad Institute                 |
| Jamie L. Marshall        | jmarshal@broadinstitute.org      | Broad Institute                 |
| Mark Aulisio             | mpa5@case.edu                    | Case Western Reserve            |
| Yijiang M. Chen          | yxc627@case.edu                  | Case Western Reserve            |
| Andrew Janowczyk         | andrew.janowczyk@case.edu        | Case Western Reserve            |
| Vidya S. Viswanathan     | vxv@case.edu                     | Case Western Reserve            |
| William S. Bush          | wsb36@case.edu                   | Case Western Reserve University |
| Dana C. Crawford         | dcc64@case.edu                   | Case Western Reserve University |
| Anant Madabhushi         | axm788@case.edu                  | Case Western Reserve University |
| Lakeshia Bush            | BUSHL3@ccf.org                   | Cleveland Clinic                |
| Agustin Gonzalez-Vicente | agustin.gonzalezvicente@case.edu | Cleveland Clinic                |
| Leal Herlitz             | herlitz@ccf.org                  | Cleveland Clinic                |
| Jane Nguyen              | nguyenj@ccf.org                  | Cleveland Clinic                |
| John O'toole             | otoolej@ccf.org                  | Cleveland Clinic                |
| Emilio Poggio            | poggioe@ccf.org                  | Cleveland Clinic                |
| John Sedor               | sedorj@ccf.org                   | Cleveland Clinic                |
| Dianna Sendrey           | SENDRED2@ccf.org                 | Cleveland Clinic                |
| Kassandra Spates-Harden  | SPATESK2@ccf.org                 | Cleveland Clinic                |

|                        |                                        |                                       |
|------------------------|----------------------------------------|---------------------------------------|
| Jonathan Taliercio     | TALIERJ@ccf.org                        | Cleveland Clinic                      |
| Leslie Cooperman       | COOPERL2@ccf.org                       | Cleveland Clinic                      |
| Stacey Jolly           | JOLLYS@ccf.org                         | Cleveland Clinic                      |
| Ellen Palmer           | elp76@case.edu                         | Cleveland Clinic                      |
| Petter M. Bjornstad    | Petter.Bjornstad@childrenscolorado.org | Colorado                              |
| Laura Pyle             | laura.pyle@cuanschutzu.edu             | Colorado                              |
| Paul Appelbaum         | appelba@nyspi.columbia.edu             | Columbia University                   |
| Jonathan M. Barasch    | jmb4@columbia.edu                      | Columbia University                   |
| Andrew S. Bomback      | asb68@columbia.edu                     | Columbia University                   |
| Pietro A. Canetta      | pac2004@cumc.columbia.edu              | Columbia University                   |
| Vivette D. D'Agati     | vdd1@columbia.edu                      | Columbia University                   |
| Krzysztof Koryluk      | kk473@cumc.columbia.edu                | Columbia University                   |
| Ning Shang             | ns3026@cumc.columbia.edu               | Columbia University                   |
| Olivia Balderes        | ob2214@cumc.columbia.edu               | Columbia University                   |
| Karla Mehl             | km3246@cumc.columbia.edu               | Columbia University                   |
| Shweta Bansal          | laura.barisoni@duke.edu                | Duke University                       |
| Theodore Alexandrov    | theodore.alexandrov@embl.de            | European Molecular Biology Laboratory |
| Helmut Rennke          | hrennke@bwh.harvard.edu                | Harvard University                    |
| Tarek M. El-Achkar     | telachka@iu.edu                        | Indiana University                    |
| Daria Barwinska        | dbarwins@iu.edu                        | Indiana University                    |
| Sharon Bledsoe         | sbledsoe@iupui.edu                     | Indiana University                    |
| Katy Borner            | katy@indiana.edu                       | Indiana University                    |
| Andreas Bueckle        | abueckle@indiana.edu                   | Indiana University                    |
| Pierre C. Dagher       | pdaghe2@iu.edu                         | Indiana University                    |
| Kenneth W. Dunn        | kwdunn@iu.edu                          | Indiana University                    |
| Michael T. Eadon       | meadon@iupui.edu                       | Indiana University                    |
| Michael J. Ferkowicz   | mferkow@iu.edu                         | Indiana University                    |
| Bruce W. Herr          | bherr@indiana.edu                      | Indiana University                    |
| Katherine J. Kelly     | kajkelly@iu.edu                        | Indiana University                    |
| Ricardo Melo Ferreira  | rimelof@iu.edu                         | Indiana University                    |
| Ellen M. Quardokus     | ellenmq@indiana.edu                    | Indiana University                    |
| Elizabeth Record       | recorde@indiana.edu                    | Indiana University                    |
| Marcelino Rivera       | maeriver@iu.edu                        | Indiana University                    |
| Jing Su                | su1@iu.edu                             | Indiana University                    |
| Timothy A. Sutton      | tsutton2@iu.edu                        | Indiana University                    |
| James C. Williams, Jr. | jwillia3@iupui.edu                     | Indiana University                    |
| Seth Winfree           | winfree@iu.edu                         | Indiana University                    |
| Steven Menez           | smenez1@jhmi.edu                       | Johns Hopkins University              |

|                            |                                     |                                         |
|----------------------------|-------------------------------------|-----------------------------------------|
| Chirag R. Parikh           | chirag.parikh@jhmi.edu              | Johns Hopkins University                |
| Avi Rosenberg              | arosen34@jhmi.edu                   | Johns Hopkins University                |
| Celia P. Corona-Villalobos | pamelacorona@jhmi.edu               | Johns Hopkins University                |
| Yumeng Wen                 | ywen14@jhmi.edu                     | Johns Hopkins University                |
| Camille Johansen           | Camille.Johansen@joslin.harvard.edu | Joslin                                  |
| Sylvia E. Rosas            | sylvia.rosas@joslin.harvard.edu     | Joslin Diabetes Center                  |
| Neil Roy                   | neil.roy@joslin.harvard.edu         | Joslin Diabetes Center                  |
| Jennifer Sun               | Jennifer.Sun@joslin.harvard.edu     | Joslin Diabetes Center                  |
| Mark Williams              | mark.williams@joslin.harvard.edu    | Joslin Diabetes Center                  |
| Richard Knight             | rk.reslend@gmail.com                | KPMP Patient Partner                    |
| Joseph Ardayfio            | joseph.ardayfio@gmail.com           | KPMP Patient Partner                    |
| Keith Brown                | kdblwyer@icloud.com                 | KPMP Patient Partner                    |
| Catherine E. Campbell      | cec5479@yahoo.com                   | KPMP Patient Partner                    |
| Taneisha Campbell          | tcampbell@giftoflifemichigan.org    | KPMP Patient Partner                    |
| Lynda Hayashi              | lyndahayashi@gmail.com              | KPMP Patient Partner                    |
| Nichole Jefferson          | nicholejeff@gmail.com               | KPMP Patient Partner                    |
| Glenda V. Roberts          | glendar@Nephrology.washington.edu   | KPMP Patient Partner                    |
| John Saul                  | jbsaul@mac.com                      | KPMP Patient Partner                    |
| Anna Shpigel               | blumkinlaw@yahoo.com                | KPMP Patient Partner                    |
| Christy Stutzke            | dzinri@aol.com                      | KPMP Patient Partner                    |
| Jack Bebiak                | jackb@gspire.org                    | KPMP Patient Partner                    |
| Robert Koewler             | rob.koewler@gmail.com               | KPMP Patient Partner                    |
| Roy Pinkeney               | 20shuvee11@gmail.com                | KPMP Patient Partner                    |
| Evren U. Azeloglu          | evren.azeloglu@mssm.edu             | Mount Sinai                             |
| Jens Hansen                | jens.hansen@mssm.edu                | Mount Sinai                             |
| Cijiang He                 | cijiang.he@mssm.edu                 | Mount Sinai                             |
| Ravi Iyengar               | ravi.iyengar@mssm.edu               | Mount Sinai                             |
| Yuguang Xiong              | yuguang.xiong@mssm.edu              | Mount Sinai                             |
| Pottumarthi Prasad         | PPrasad@northshore.org              | Northshore                              |
| Anand Srivastava           | anand.srivastava@northwestern.edu   | Northwestern                            |
| Sethu M. Madhavan          | Sethu.Madhavan@osumc.edu            | Ohio State University                   |
| Samir Parikh               | samir.parikh@osumc.edu              | Ohio State University                   |
| Brad Rovin                 | brad.rovin@osumc.edu                | Ohio State University                   |
| John P. Shapiro            | John.Shapiro@osumc.edu              | Ohio State University                   |
| Christopher R. Anderton    | christopher.anderton@pnnl.gov       | Pacific Northwest National Laboratories |
| Ljiljana Pasa-Tolic        | ljiljana.pasatolic@pnnl.gov         | Pacific Northwest National Laboratories |
| Dusan Velickovic           | dusan.velickovic@pnnl.gov           | Pacific Northwest National Laboratories |

|                      |                                  |                                         |
|----------------------|----------------------------------|-----------------------------------------|
| Jessica Lukowski     | jessica.lukowski@pnnl.gov        | Pacific Northwest National Laboratories |
| George (Holt) Oliver | george.oliver@phhs.org           | Parkland                                |
| Rachel Sealfon       | rsealfon@flatironinstitute.org   | Princeton University                    |
| Olga Troyanskaya     | ogt@genomics.princeton.edu       | Princeton University                    |
| Aaron Wong           | awong@flatironinstitute.org      | Princeton University                    |
| Katherine R. Tuttle  | katherine.tuttle@providence.org  | Providence Health                       |
| Ari Pollack          | ari.pollack@seattlechildrens.org | Seattle Children's Hospital             |
| Yury Goltsev         | goltsev@stanford.edu             | Stanford University                     |
| Nicholas Lucarelli   | njlucare@buffalo.edu             | SUNY Buffalo                            |
| Pinaki Sarder        | pinaki.sarder@ufl.edu            | SUNY Buffalo                            |
| Blue B. Lake         | blake@altoslabs.com              | UC San Diego                            |
| Kun Zhang            | kzhang@eng.ucsd.edu              | UC San Diego                            |
| Patrick Boada        | Patrick.Boada@ucsf.edu           | UC San Francisco                        |
| Zoltan G. Laszik     | Zoltan.Laszik@ucsf.edu           | UC San Francisco                        |
| Minnie Sarwal        | Minnie.Sarwal@ucsf.edu           | UC San Francisco                        |
| Tara Sigdel          | tara.sigdel@ucsf.edu             | UC San Francisco                        |
| Kavya Anjani         | Kavya.Anjani@ucsf.edu            | UC San Francisco                        |
| Tariq Mukatash       | Tariq.Mukatash@ucsf.edu          | UC San Francisco                        |
| Rita R. Alloway      | ALLOWARR@UCMAIL.UC.EDU           | University of Cincinnati                |
| Ashley R. Burg       | Ashley.Burg@cchmc.org            | University of Cincinnati                |
| Paul J. Lee          | leep7@ucmail.uc.edu              | University of Cincinnati                |
| Adele Rike           | rikea@ucmail.uc.edu              | University of Cincinnati                |
| Tiffany Shi          | tiffany.shi@cchmc.org            | University of Cincinnati                |
| E. Steve Woodle      | WOODLEES@UCMAIL.UC.EDU           | University of Cincinnati                |
| Heather Ascani       | ascanikh@med.umich.edu           | University of Michigan                  |
| Ulysses GJ. Balis    | ulysses@med.umich.edu            | University of Michigan                  |
| Victoria M. Blanc    | vmb@med.umich.edu                | University of Michigan                  |
| Ninive C. Conser     | costan@med.umich.edu             | University of Michigan                  |
| Sean Eddy            | seaneddy@med.umich.edu           | University of Michigan                  |
| Yongqun He           | yongqunh@med.umich.edu           | University of Michigan                  |
| Jeffrey B. Hodgin    | jhodgin@umich.edu                | University of Michigan                  |
| Matthias Kretzler    | kretzler@med.umich.edu           | University of Michigan                  |
| Chrysta Lienczewski  | boridley@med.umich.edu           | University of Michigan                  |
| Jinghui Luo          | jinghui@umich.edu                | University of Michigan                  |
| Laura H. Mariani     | lmariani@med.umich.edu           | University of Michigan                  |
| Rajasree Menon       | rajmenon@med.umich.edu           | University of Michigan                  |
| Edgar Otto           | eotto@med.umich.edu              | University of Michigan                  |
| Jennifer Schaub      | schaubj@med.umich.edu            | University of Michigan                  |

|                       |                                       |                          |
|-----------------------|---------------------------------------|--------------------------|
| Becky Steck           | roesch@med.umich.edu                  | University of Michigan   |
| Renee Frey            | frenee@med.umich.edu                  | University of Michigan   |
| Michele M. Elder      | mie1@pitt.edu                         | University of Pittsburgh |
| Daniel E. Hall        | halde@upmc.edu                        | University of Pittsburgh |
| Raghavan Murugan      | muruganr@ccm.upmc.edu                 | University of Pittsburgh |
| Paul M. Palevsky      | palevsky@pitt.edu                     | University of Pittsburgh |
| Parmjeet Randhawa     | randhawapa@upmc.edu                   | University of Pittsburgh |
| Matthew Rosengart     | rosengartmr@upmc.edu                  | University of Pittsburgh |
| Mitchell Tublin       | tublme@upmc.edu                       | University of Pittsburgh |
| Tina Vita             | vitatm@upmc.edu                       | University of Pittsburgh |
| Matthew Gilliam       | MJG136@pitt.edu                       | University of Pittsburgh |
| John A. Kellum        | kellum@pitt.edu                       | University of Pittsburgh |
| James Winters         | wintersj4@upmc.edu                    | University of Pittsburgh |
| Charles E. Alpers     | calp@u.washington.edu                 | University of Washington |
| Ashley Berglund       | bergla@uw.edu                         | University of Washington |
| Brooke Berry          | bberry3@uw.edu                        | University of Washington |
| Kristina N. Blank     | blankk@u.washington.edu               | University of Washington |
| Jonas Carson          | jcarson@u.washington.edu              | University of Washington |
| Stephen Daniel        | sdaniel@uw.edu                        | University of Washington |
| Ian H. De Boer        | IDeBoer@Nephrology.washington.edu     | University of Washington |
| Ashveena L. Dighe     | ashveena@Nephrology.washington.edu    | University of Washington |
| Frederick Dowd        | dowdf@u.washington.edu                | University of Washington |
| Jonathan Himmelfarb   | jhimmelfarb@nephrology.washington.edu | University of Washington |
| Andrew N. Hoofnagle   | ahoof@uw.edu                          | University of Washington |
| Christine Limonte     | climonte@uw.edu                       | University of Washington |
| Robyn L. McClelland   | rmcclell@u.washington.edu             | University of Washington |
| Natalya Sarkisova     | nasark@kri.washington.edu             | University of Washington |
| Sean D. Mooney        | sdmooney@u.washington.edu             | University of Washington |
| Kasra Rezaei          | krezaei@uw.edu                        | University of Washington |
| Stuart Shankland      | Sshankland@Nephrology.washington.edu  | University of Washington |
| Jamie Snyder          | jas1208@uw.edu                        | University of Washington |
| Ruikang Wang          | wangr@uw.edu                          | University of Washington |
| Stephanie M. Grewenow | stephaniegrewenow@gmail.com           | University of Washington |
| Christopher Park      | cpark3@nephrology.washington.edu      | University of Washington |
| Adam Wilcox           | abwilcox@uw.edu                       | University of Washington |
| Kayleen Williams      | kmfw@u.washington.edu                 | University of Washington |
| Shweta Bansal         | bansals3@uthscsa.edu                  | UT Health San Antonio    |

|                        |                                      |                                 |
|------------------------|--------------------------------------|---------------------------------|
| Richard Montellano     | montellano@uthscsa.edu               | UT Health San Antonio           |
| Annapurna Pamreddy     | pamreddy@uthscsa.edu                 | UT Health San Antonio           |
| Kumar Sharma           | sharmak3@uthscsa.edu                 | UT Health San Antonio           |
| Manjeri Venkatachalam  | venkatachal@uthscsa.edu              | UT Health San Antonio           |
| Hongping Ye            | yeh1@uthscsa.edu                     | UT Health San Antonio           |
| Guanshi Zhang          | zhangg3@uthscsa.edu                  | UT Health San Antonio           |
| S. Susan Hedayati      | susan.hedayati@utsouthwestern.edu    | UT Southwestern                 |
| Asra Kermani           | Asra.Kermani@UTSouthwestern.edu      | UT Southwestern                 |
| Christopher Y. Lu      | Christopher.lu@utsouthwestern.edu    | UT Southwestern                 |
| R. Tyler Miller        | tyler.miller@utsouthwestern.edu      | UT Southwestern                 |
| Orson W. Moe           | orson.moe@utsouthwestern.edu         | UT Southwestern                 |
| Jiten Patel            | Jiten.Patel@UTSouthwestern.edu       | UT Southwestern                 |
| Anil Pillai            | Anil.pillai@utsouthwestern.edu       | UT Southwestern                 |
| Kamalanathan Sambandam | KSAMBANDAM@UTSouthwestern.edu        | UT Southwestern                 |
| Jose Torrealba         | jose.torrealba@utsouthwestern.edu    | UT Southwestern                 |
| Robert D. Toto         | robert.toto@utsouthwestern.edu       | UT Southwestern                 |
| Miguel Vazquez         | miguel.vazquez@utsouthwestern.edu    | UT Southwestern                 |
| Nancy Wang             | Zhengnan.Wang@UTSouthwestern.edu     | UT Southwestern                 |
| Dianbo Zhang           | Dianbo.Zhang@UTSouthwestern.edu      | UT Southwestern                 |
| Simon C. Lee           | simoncraddock.lee@utsouthwestern.edu | UT Southwestern                 |
| Harold Park            | Harold.park@utsouthwestern.edu       | UT Southwestern                 |
| Natasha Wen            | yu.wen@utsouthwestern.edu            | UT Southwestern                 |
| Richard M. Caprioli    | richard.m.caprioli@Vanderbilt.Edu    | Vanderbilt                      |
| Nathan Patterson       | nathan.h.patterson@vanderbilt.edu    | Vanderbilt                      |
| Kavya Sharman          | kavya.sharman@Vanderbilt.Edu         | Vanderbilt                      |
| Jeffrey M. Spraggins   | jeff.spraggins@Vanderbilt.Edu        | Vanderbilt                      |
| Raf Van de Plas        | raf.vandeplas@tudelft.nl             | Vanderbilt                      |
| Jeanine Basta          | jbasta@wustl.edu                     | Washington University St. Louis |
| Sabine M. Diettman     | sdietmann@wustl.edu                  | Washington University St. Louis |
| Joseph P. Gaut         | jpgaut@wustl.edu                     | Washington University St. Louis |
| Sanjay Jain            | jains@dom.wustl.edu                  | Washington University St. Louis |
| Michael I. Rauchman    | mrauchma@wustl.edu                   | Washington University St. Louis |
| Anitha Vijayan         | avijayan@wustl.edu                   | Washington University St. Louis |
| Lloyd G. Cantley       | lloyd.cantley@yale.edu               | Yale University                 |
| Vijaykumar R. Kakade   | vijayakumar.kakade@yale.edu          | Yale University                 |
| Dennis Moledina        | dennis.moledina@yale.edu             | Yale University                 |

|                   |                            |                 |
|-------------------|----------------------------|-----------------|
| Melissa M. Shaw   | melissa.m.shaw@yale.edu    | Yale University |
| Ugochukwu Ugwuowo | ugochukwu.ugwuowo@yale.edu | Yale University |
| Francis P. Wilson | francis.p.wilson@yale.edu  | Yale University |
| Tanima Arora      | Tanima.arora@yale.edu      | Yale University |
