# Supplementary material for: A spatially anchored transcriptomic atlas of the human kidney papilla identifies significant immune injury in patients with stone disease
Source: Nat Commun. 2023 Jul 19;14:4140. doi: 10.1038/s41467-023-38975-8 (PMC10356953; doi:10.1038/s41467-023-38975-8)
Supplement: Supplementary file 4 — Source Data [file 41467_2023_38975_MOESM4_ESM.xlsx]

## Sheet: Fig 1B
subclass.l1	Cortex	Medulla	Papilla	pvalue_Medulla_Cortex	pvalue_Papilla_Cortex
ATL	35	337	6803	2.0901e-108	0
CNT	7243	353	62	0	0
DCT	8703	274	11	0	0
DTL	859	7887	4170	0	0
EC	9720	6992	7346	9.19886e-62	7.49897e-67
FIB	8179	4690	15596	0.171614	0
IC	8011	2968	470	1.54618e-91	0
IMM	8896	2682	2498	3.43584e-202	2.3433e-273
NEU	56	20	2	0.0937646	3.23192e-09
PapE	10	2	1291	0.23252	0
PC	4780	6810	30641	0	0
PEC	1518	100	5	1.35565e-177	1.4373e-293
POD	2459	232	7	3.32819e-239	0
PT	46700	7546	4206	0	0
TAL	21004	30846	2320	0	0
VSM/P	2447	1368	885	0.986407	3.58841e-37

## Sheet: Fig 1P
MMP7 Low	MMP7 High
6.143	10.731
5.311	9.746
5.188	14.978
1.628	5.286
4.268	5.877
2.669
1.944
2.189
2.477
2.984
2.07
2.751
4.608
2.397
p = 0.0001
unpaired t-test
two tailed
lines at the median

## Sheet: Fig 2C-D
Ward Hierarchical Clusters	Object	PosX	PosY	PosZ	CD31_Ring_Mean	CD3_Ring_Mean	CD20_Ring_Mea	CD45_Ring_Mean	Ki67_Ring_Mean	CD11c_Ring_Mean	CD90_Ring_Mean	p-cJUN_Ring_Mean	FN1_Ring_Mean	AQP1_Ring_Mean	PROM1_Ring_Mean	SPP1_Ring_Mean	CDH1_Ring_Mean	VCAM1_Ring_Mean	CTNNB1_Ring_Mean	CD68_Ring_Mean	LC3_Ring_Mean	IGFBP7_Ring_Mean	VIM_Ring_Mean	CitH3_Ring_Mean	pMLKL_Ring_Mean	CD206_Ring_Mean	KRT8_Ring_Mean	α-SMA_Ring_Mean	tSNE_100__09_13_0	tSNE_100__09_13_1
Endo-2	0	2.5	8805	0	39290.1	104.422	168.111	55.6444	3104.69	187.4	2295.56	126.6	9905.95	1332.13	109.644	806.422	666.067	201.111	2255.67	1522.67	3561.76	1982.18	5333.04	359.778	159.978	393.422	682.578	277	6.65246	-16.284
Endo-2	10	9	10023.5	0	31747.1	155.968	70.2684	433.937	7239.19	336.116	4661.47	384.247	22861	1736.26	352.3	1039.74	996.926	13.6842	3972.64	2699.62	3890.76	2953.34	4527.59	632.195	173.595	4132.56	1125.91	718.847	6.80579	-17.2066
Endo-2	19	12	8811	0	17917.6	72.9912	10.3421	109.316	3415.65	102.974	3154.64	85.8509	16526.4	1204.66	84.1754	1112.05	632.412	188.395	1426.18	409.675	1725.66	2241.35	1683.25	548.412	78.4123	156.789	730.825	1026.33	1.46066	-12.6633
Endo-2	25	17.5	8775	0	30566.4	71.2255	39.6765	78.0441	3286.92	202.382	7985.17	168.74	10523.8	1240.28	105.402	854.936	631.431	188.304	2146.44	934.627	2400.2	1451.44	4318.29	430.926	163.524	289.637	1774.68	291.368	6.28274	-17.2883
Endo-2	29	21	9775.5	0	33652.5	139.016	88.8641	71.5054	3100.98	200.658	9056.49	193.065	12182.6	1382.94	154.636	1800.48	257.647	122.261	2556.66	2340.16	3164.74	3095.79	6194.62	637.598	139.87	664.163	1270.94	184.571	5.81424	-17.7712
Endo-2	41	36	9792	0	43961.1	73.6979	8.26042	29.4479	2334.32	146.771	1607.73	60.9792	9220.11	1195.1	102.896	451.344	342.76	25.6667	3308.51	1208.21	2837.12	2051.76	5478.05	432.292	53.4688	556.812	33197.3	151.656	6.94726	-16.4342
Endo-2	55	54	9834.5	0	14860.3	106.508	80.0995	41.9669	4513.36	228.906	3616.39	289.094	9062.77	1654.2	178.668	1006.22	2251.47	60.8729	2344.96	1104.9	1896.92	1157.34	3078.24	1042.52	145.431	518.624	416.895	165.818	2.08022	-12.546
Endo-2	70	66	9058.5	0	1690.23	117.234	8.03165	0.272152	8896.89	358.627	8723.91	169.057	9636.27	2453.83	812.114	530.057	6109.72	0	8443.2	1637.21	4808.38	1446.43	1328.06	821.798	191.563	249.715	42358.4	166.506	-0.963029	6.28504
Endo-2	71	67.5	9825.5	0	15843.7	47.6102	24.1921	1.76271	8129.25	153.243	526.339	112.09	4774.28	1180.08	158.102	223.424	5447.39	4.41243	4613.83	704.345	2492.92	891.898	372.695	737.22	90.6328	271.181	32132.3	149.774	-3.55685	4.82707
Endo-2	87	77.5	9053.5	0	383.783	150.467	6.40833	0	12749.2	209.217	15621.3	98.0917	10669.8	2812.59	470.742	810.575	4457.43	0	7946.26	1514.97	4174.68	1896.62	2259.84	627.767	152.633	162.75	33383.7	159.967	-2.63539	-17.1578
Endo-2	88	77	9585	0	25446.7	130.402	47.9195	61.2759	5065.76	310.414	4770.45	271.54	19766.2	1268.05	239.31	1510.87	3297.52	19.069	2732.38	1051.69	3144.11	4701.03	442.333	838.172	280.782	660.92	11761.2	338.069	2.58062	-15.6248
Endo-2	90	83	9074.5	0	14133.1	48.3486	41.3853	0.321101	1767.44	12.789	328.826	6.98165	2493.37	951.193	303.211	0.743119	2448.68	0	4539.79	133.523	2383.16	417.028	0.486239	97.5138	19.6514	41.8624	51920.1	97.0642	-7.63292	10.5797
Endo-2	99	97	9045	0	30975.3	91.6054	0.156463	0	4906.73	166.619	8861.23	139.109	9288.44	1046.54	96.7619	450.551	1060.7	0.306122	2130.52	1186.6	1460.02	1896.59	2549.88	276.34	162.653	243.374	7772.44	138.442	1.50696	-16.7195
Endo-2	113	109.5	8870	0	1347.43	136.088	85.9123	104.535	3865.18	179.895	7695.31	120.14	9170.47	936.035	51.4211	648	464.289	74.3597	2456.94	950.149	1839.4	1806.29	3098.49	570.184	57.5263	73.5439	290.658	3830.1	-4.5926	-15.4482
Endo-2	117	116.5	9077	0	23344.8	113.463	46.3559	29.8701	4252.54	189.119	1830.19	266.723	8860.11	1351.18	151.508	723.136	486.164	75.5876	2312.54	541.051	2150.48	865.701	1570.38	698.955	120.842	205.373	1563.66	128.011	6.68371	-11.9129
Endo-2	128	129.5	9181	0	22894.9	80.7727	67.096	25.9141	2018.5	180.813	3039.65	112.035	10739.2	1127.83	80.3586	572.732	715.207	36.8889	2408.51	750.364	1628.43	1168.69	3218.16	575.995	99.4545	527.374	981.061	141.53	5.59297	-13.8691
Endo-2	129	128.5	8896	0	14495.1	165.814	58.8088	10.7059	10332.6	301.868	5373.43	127.637	14853.7	2053.33	355.637	823.186	3327.89	7.46569	5892.66	1685.98	4121.86	2000.37	2744.53	675.819	182.726	485.534	23548.1	170.676	0.975453	-14.9026
Endo-2	132	123.5	8869	0	26159.7	101.951	51.1262	14.9806	3637.75	191.913	6875.94	105.981	18057.7	1977.74	97	1215.18	720.369	33.5534	2613.41	795.418	3100.62	2388.74	1423.93	696.078	114.777	748.184	614.437	167.922	2.22862	-15.9112
Endo-2	134	131	9218	0	39909.7	132.28	150.151	155.103	5465.32	242.142	4522.41	303.884	7408.76	1587.97	158.681	802.586	909.539	213.862	3966.97	1139.94	3056.84	1343.21	2523.27	763.099	106.638	1780.05	914.797	189.444	8.36465	-17.5561
Endo-2	136	128	8876.5	0	30713.6	155.103	87.5747	1.42529	4479.9	305.977	9024.59	101.276	12499.6	2284.15	133	908.103	815.839	25.3218	3016.01	858.126	3395.09	1971.49	1457.08	481.954	100.655	1148.49	1218.37	144.207	2.54689	-17.1167
Endo-2	138	129.5	10343	0	23544.1	87.7857	168.54	648.198	7265.67	227	1777.86	258.214	6939.75	2028.32	152.548	628.984	1347.22	238.984	2537.94	892.849	1992.04	761.206	6009.05	942.96	138.516	730.857	7101	132.119	5.60165	-15.8813
Endo-2	145	141	10311.5	0	46783.4	112.006	150.046	2542.63	3822.75	370.494	5717.96	181.029	6021.67	2240.49	162.856	676.368	1332.36	251	3889.95	2163.74	3215.15	1628.26	3680.57	1041.41	151.494	574.759	905.833	1757.58	9.52207	-19.43
Endo-2	150	139.5	9996	0	18727.8	81.3979	0.290323	8.41935	3589.55	177.473	550.936	142.742	6190.26	978.419	147.72	11.3226	543.957	0	4011.42	619.064	1938.81	723.979	708.086	289.72	74.6344	237.806	39793.1	16.5161	-3.60269	4.69314
Endo-2	152	143	8500.5	0	32468.3	81.1837	125.381	61.9728	2154.83	166.279	8100.84	142.218	10747.2	1467.36	102.741	910.687	880.531	190.116	3876.93	1668.25	2148.12	1850.22	3926.97	501.864	126.741	138.109	1127.67	4785.4	5.00987	-18.8809
Endo-2	158	152	9413	0	24786.6	87.322	265.282	267.701	8780.25	135.181	1693.28	205.294	8633.03	1501.15	137.215	913.215	1004.15	262.938	2435.8	2150.69	1732.34	917.475	6471.98	768.717	116.52	163.616	873.808	134.424	5.67897	-15.9952
Endo-2	169	160	9755.5	0	36260.6	71.5949	115.262	189.482	2146.46	134.718	689.554	149.744	4326.93	1244.37	91.8667	447.579	174.621	157.477	1333.13	946.067	1586.25	797.877	2356.18	660.59	81.1436	541.38	278.174	82.6205	8.98466	-13.9627
Endo-2	176	161.5	8280	0	13361.2	97.1919	76.1802	25.5174	3031.58	189.006	6734.72	124.308	9112.74	1800.99	123.349	779.18	14165.9	78.0174	6404.98	989.372	3630.61	1720.56	2751.79	400.192	105.669	152.721	8300.86	169.302	0.834111	-15.2473
Endo-2	182	165.5	9170.5	0	26748.8	63.3782	184.199	91.9744	2775.73	87.6154	4815.18	142.705	5831.53	1312.45	111.365	681.147	1391.22	147.218	2239.39	1128.6	1945.03	1571.39	2807.03	602.051	56.4744	493.558	2073.96	121.801	4.31603	-15.006
Endo-2	194	174	9484.5	0	24330	90.1469	129.407	273.215	6956.81	156.729	2260.72	180.74	5504.09	1574.85	152.621	410.356	982.316	117.333	2373.89	952.723	1595.02	656.853	4615.06	612.068	152.757	657.571	885.339	1075.69	5.90649	-15.0964
Endo-2	201	180.5	9065	0	22283.3	56.3967	21.4076	15.3315	3152.55	141.505	5271.04	82.288	5753.64	958.799	65.8641	332.266	612.038	71.7391	1699.67	423.571	1908.34	693.408	1229.28	278.375	83.6957	152.538	1162.45	54.3261	2.78513	-15.0414
Endo-2	220	200	7306	0	14732.4	73.8912	153.19	140.626	6684.78	130.075	7252.05	86.4082	12209.8	1210.46	89.6191	703.075	577.728	297.286	1532.73	339.129	2062.23	1383.97	2748.93	550.803	127.891	157.245	626.667	109.19	-0.314645	-15.3615
Endo-2	223	203	8623	0	47496.2	116.915	123.945	24.6424	3290.38	205.709	3689.82	144.055	8387.92	1643.47	144.576	981.473	585.424	167.485	3440.6	1689.74	2735.71	2559.78	3691.24	662.061	155.733	720.873	1112.57	271.188	8.30784	-17.9503
Endo-2	237	210.5	9235	0	34488	97.0961	315.299	266.39	3406.94	129.136	2492.72	130.791	2512.62	1245.54	68.0226	386.395	679.599	267.808	2870.52	1494.25	3285.72	348.571	6593.24	610.186	57.5028	795.373	632.113	94.4915	6.08853	-16.2626
Endo-2	252	225	8129	0	17166.9	131.116	54.5072	22.8164	3709.7	145.488	11122.5	120.657	16474.9	1473.08	107.425	802.826	1063.74	40.7391	3049.43	794.72	1805.03	1396.13	2517.05	533.502	110.739	309.01	5520.59	80.8213	-0.476841	-16.3722
Endo-2	260	227	8180	0	20684.1	85.9215	29.2775	11.6073	2144.3	275.801	4610.38	170.707	14580.7	1164.23	113.408	932.178	689.503	85.7277	1862.95	810.387	2257.13	1439.87	3016.57	817.277	154.482	436.408	352.838	81.0942	2.03285	-13.037
Endo-2	281	237	9315	0	28438.3	80.2422	90.4141	11.3984	13530.3	263.398	9912.41	98.5781	18814.3	1810.65	359.633	1279.06	14739.3	10.5938	8337.78	1332.81	4489.31	1751.92	713.859	974.492	140.18	115.836	35987.9	432.438	2.08087	-16.769
Endo-2	285	239	8147.5	0	4681.87	92.831	52.507	11.2113	5894.44	225.099	9563.74	125.585	18160.3	1371.44	117.655	1582.17	421.247	99.8803	2556.75	896.761	2854.61	872.106	1680.38	547.782	155.979	192.218	835.768	98.5352	-2.71119	-15.5107
Endo-2	301	244	8416.5	0	39830.3	66.8	6.30667	0	2605.19	292.973	3229.59	139.893	13512.2	1152.92	135.453	545.933	920.947	6.74667	1974.35	1051.33	1949.87	1940.2	3662.28	584.907	159.013	1554.69	2033.57	69.9333	7.62005	-16.7331
Endo-2	308	249.5	8151.5	0	25585.4	63.4872	48.9744	42.7949	2030.37	69.7949	9469.41	78.8205	21842.3	1103.81	61.8077	1613.45	491.013	147.218	1032.06	439.064	1669.37	1501.24	1613.32	289.628	118.833	67.2564	555.949	749.179	1.08433	-16.556
Endo-2	316	257	8437	0	18752	101.592	107.19	146.92	5298.09	247.695	7025.75	191.356	8755.69	1853.76	131.351	872.172	877.029	97.8908	3783.05	1350.99	3133.65	2451.39	2924.63	694.81	200.845	635.787	1372.97	126.339	1.10078	-15.5635
Endo-2	350	277.5	9834.5	0	23647.5	103.818	610.828	455.394	8181.25	206.798	6500.07	124.485	8465.28	2471.12	139.444	1501.17	482	356.768	4525.96	2837.18	7375.52	3097.17	3585.13	621.455	79.7879	211.263	319.222	250.556	3.94528	-17.108
Endo-2	354	291.5	9607	0	10953.6	123.57	206.624	1508.46	6175	284.032	8005.58	200.294	18732.1	1186.09	91.3584	1116.22	692.964	190.025	3483.35	3466.54	3497.72	1742.28	950.204	576.186	91.2832	4322.22	1415.04	5242.4	0.595333	-16.9246
Endo-2	359	287	7934	0	25903.8	67.9739	81.8628	47.9477	2857.8	170.085	3264.16	128.314	9296.56	919.15	39.4575	807.137	297.222	180.346	788.373	1145.93	1592.13	1069.58	3721.97	596.516	100.15	333.229	451.497	109.425	5.77994	-14.1237
Endo-2	365	289.5	8824	0	15355.6	101.681	5.15	0.01875	3703.76	134.419	3553.7	151.938	7659.54	1286.34	157.131	272.456	1929.78	1.18125	2379.96	743.275	2430.89	1274.26	827.7	237.419	101.838	252.787	3576.31	892.294	0.318111	-12.1532
Endo-2	367	295.5	9259	0	20481.7	80.1176	303.562	371.327	3165.07	139.791	2316.18	183.784	2174.3	1449.78	118.641	549.817	467.15	375.458	1514	511.157	3800.65	472.987	1555.76	863.124	97.0327	304.386	397.124	123.373	6.46958	-12.6265
Endo-2	384	303.5	8879	0	23873.8	101.144	135.126	33.479	4108.92	195.701	2871	189.653	8677.96	1669.85	136.844	725.521	1118.77	109.485	3881.71	1311.68	2657.71	1651.03	2497.71	546.317	96.9102	269.725	2063.69	297.539	5.08585	-13.9671
Endo-2	388	307	9057.5	0	26842.8	124.602	89.125	19.2454	2492.8	208.597	1535.2	127.301	10848.7	1294.57	163.694	413.301	625.19	19.3519	1944.63	1009.4	3134.88	1535.45	2049.87	503.63	140.269	232.329	1537.11	144.282	7.10484	-13.2705
Endo-2	398	316.5	8689	0	21621.3	96.865	13.5696	0.0168776	5089.08	195.578	3843.02	144.637	10375.9	2608.08	232.574	343.878	1335.89	0.932489	4035.65	1019.92	3235.8	1697.89	1310.34	633.574	184.198	213.793	27198.6	123.717	3.18686	-13.7304
Endo-2	401	314.5	8399.5	0	18197.4	58.24	15.7133	41.1	3384.49	179.18	10260.4	209.273	12220.7	2040.75	122.24	737.393	162.013	115.993	779.907	448.88	2319.1	2384.53	2300.78	1125.27	113.307	106.587	287.173	109.327	0.185184	-16.2064
Endo-2	403	315.5	10266.5	0	23168.8	128.356	12.7576	4.87879	6409.97	196.667	4807.14	197.439	9613.74	1413.55	134.288	258.288	1129.9	4.52273	3292.55	915.053	3746.64	2057.48	1315.04	519.273	89.0833	393.053	3901.59	2972.83	2.24644	-15.2257
Endo-2	405	319	9730	0	5448.92	105.135	0.943262	0	9080.97	262.099	10905	301.227	4067.34	1699.52	525.27	3.35461	10231	0	6327.5	982.426	3401.74	729.546	5.35461	894.199	160.816	156.227	45732.6	432.752	-1.23242	5.9757
Endo-2	406	318.5	8567	0	45741.9	94.6232	18.9928	28.558	4133.04	100.341	1558	96.0362	9554.53	1289.07	84.5725	562.413	1584.88	43.7319	2868.72	1013.75	3346.01	1997.3	1780.75	485.696	93.7029	3109.36	4357.19	84.8043	10.3854	-16.5383
Endo-2	417	327.5	9253	0	16101	65.1786	165.167	88.0179	1280.45	124.661	5479.72	148.363	11757.9	990.863	85.2679	937.452	379.744	172.44	1505.89	376.589	1212.32	870.875	890.982	573.101	78.1012	163.696	433.78	115.28	-0.770247	-13.4504
Endo-2	432	332.5	10072	0	23619.1	80.2595	104.715	236.715	6341.07	213.671	457.703	207.044	7964.71	1785.42	105.373	802.272	515.975	142.12	3063.72	1216.75	3228.93	1526.44	2097.11	954.892	96.0506	720.323	732.266	82.3418	6.00099	-13.2024
Endo-2	438	339.5	9724.5	0	5198.33	90.0057	51.8621	548.736	5808.99	174.534	13606.4	133.029	10177.8	1412.41	427.799	746.184	5427.3	24.2644	3667.36	970.753	2548.06	1764.96	197.954	600.333	79.5575	1707.84	21157.9	1526.28	-2.01584	-16.4113
Endo-2	444	346	8998	0	26157.3	81.8757	93.6432	36.9297	3925.08	194.865	2099.88	148.6	11769.2	1719.87	107.449	1175.28	1546.61	120.746	2203.06	897.362	2839.51	1767.12	1583.36	602.995	201.211	330.049	3171.81	116.476	6.26081	-13.3607
Endo-2	448	349.5	9757.5	0	39022.3	99.1198	98.8958	76.3021	2659.83	141.635	3605.97	158.75	8615.48	1221.62	77.8542	733.521	466.281	95.4896	1672.54	1021.34	2385.85	1233.77	3442.78	475.078	64.4531	220.698	265.964	2101.86	7.40494	-16.7972
Endo-2	450	348.5	10061.5	0	51610.4	160.644	187.477	130.856	4416.36	198.295	2003.73	307.311	9848.7	1998.39	151.826	1357.22	932.106	290.735	3343.44	508.591	4677.34	2785.42	2365.98	1194.52	118.242	77.7652	1410.76	87.303	9.69708	-18.2849
Endo-2	461	360.5	10438	0	16030.6	135.039	13.2098	72.7659	5365.22	200.58	1057.9	256.171	10997	1631.65	217.361	351.18	960.283	19.3024	2593.03	677.956	2579.98	1377.59	1069.67	827.829	136.6	459.029	638.254	168.283	5.03937	-11.2567
Endo-2	462	358	9256	0	17105.1	74.5379	217.742	214.273	4952.08	122.902	5741.02	171.076	7448.73	1405.33	107.455	777.47	1015.04	285.439	3225.47	885.273	1764.08	793.924	2263.58	724.5	95.1212	125.879	1160.08	108.614	1.11658	-13.9547
Endo-2	467	358	7983.5	0	30797.7	107.187	264.304	47.9532	6081.2	193.392	2052.34	219.661	8618.82	1930.25	140.737	689.754	1102.08	430.503	2971.31	877.082	2062.52	1315.35	2429.97	938.357	194.041	486.509	1206.6	75.4795	7.3279	-14.2713
Endo-2	485	372.5	8880	0	33757.6	99.9801	50.4527	39.2388	1716.71	119.388	788.876	147.328	10074	1306.33	90.0597	593.871	797.403	61.3035	2251.46	1007.92	2553.11	1500.1	1920.21	483.473	122.567	336.537	1108.1	109.259	9.1107	-14.2198
Endo-2	486	370.5	7974.5	0	30231.4	90.5309	31.7531	0	2705.37	236.877	695.506	220.247	12505	1010	101.58	201.568	947.296	164.21	1241.78	620.037	1572.46	1303.8	1984.98	1173.3	113.543	1106.32	1661.37	143.272	8.67903	-12.517
Endo-2	494	374.5	10258.5	0	41588	78.2151	16.3226	9.69892	1366.97	66.2473	2874.71	91.6452	16160.6	1006.33	124.538	688.946	1248.88	1.96774	1521.16	725.968	1584.85	1914.49	1463.9	125.108	67.172	300.817	559.581	75.2473	10.5239	-14.0936
Endo-2	504	387	10318	0	22813.9	125.144	39.0884	1.98895	5000.38	143.972	6076.92	179.961	8861.38	1488.91	120.492	599.204	1401.13	8.62431	2861.32	816.641	3071.56	2230.35	858.232	520.879	71.2265	241.359	6581.01	486.635	2.23631	-15.3531
Endo-2	509	389	8769.5	0	19875.2	170.103	38.2474	15.0515	5264.05	311.253	8562.25	155.912	5900.38	2142.97	232.433	591.711	1676.42	6.65464	4538.65	1407.56	2923.88	1330.97	1837.68	1539.02	210.165	1264.32	13282.2	123.381	1.67642	-16.0628
Endo-2	521	400	10150.5	0	26900.7	123.731	42.6287	5.51497	2150.22	131.683	3458.93	205.377	9899.16	1597.13	160.09	583.419	855.838	9.90419	3039.61	651.545	2414.14	1463.89	551.072	509.958	110.15	421.982	4037.77	164.006	3.86403	-13.9681
Endo-2	543	415.5	8953.5	0	12948	109.043	6.45714	20.8286	1869.04	149.229	3310.14	187.1	12934.7	1633.43	124.943	743.514	1337.09	30.0286	2216.27	822.314	2060.4	2659.17	603.243	570.043	189.5	550.814	1756.06	185.343	0.112573	-11.8743
Endo-2	556	432.5	10030	0	5927.85	143.034	65.2067	0.860577	5024.76	324.144	15481.4	273.577	14157	2444.96	2929.71	1200.29	6809.95	40.9327	8124.33	1389.91	3745.17	3734.47	1981.75	1215.8	178.303	23.9808	21083.2	1688.82	-2.52067	-17.1853
Endo-2	559	433.5	7537	0	5921.24	155.913	77.5942	193.213	4137.99	260.551	1088.65	263.266	4945.51	1851.71	122.338	259.783	1681.46	97.1546	2848.84	712.034	3076.19	1190.5	1982.66	1395.13	270.536	348.565	11358.2	231.961	-7.04613	-10.9188
Endo-2	568	445.5	7957	0	15422	87.4516	212.188	142.833	3749.7	156.091	3220.41	202.737	5917.4	1308.46	72.7204	404.978	711.156	196.414	1687.81	789.409	1414.57	633.597	3087.57	1004.56	146.489	1002.27	350.801	98.3602	2.14738	-12.3544
Endo-2	575	451.5	7504.5	0	16932.6	106.277	133.296	26.4757	4440.45	78.8301	2478.94	184.626	9315.87	1530.79	85.5146	723.078	710.175	198.422	2489.3	894.102	3047.88	1782.98	2621.74	1011.35	153.345	1192.43	972.762	177.078	4.86901	-13.7752
Endo-2	580	450.5	8703	0	27033.1	94.2028	45.9511	9.7972	2014.03	199.133	10056.7	229.629	18784.2	1929.24	167.531	1254.41	1036.2	35.028	2938.36	1274.88	2290.22	2544.5	1453.73	878.72	170.469	1202.25	796.056	183.406	1.74966	-16.8471
Endo-2	584	455.5	10008	0	9098.73	186.369	220.621	57.7929	5573.72	300.641	13093.3	277.576	23176.1	2097.03	1829.16	2398.89	7048.36	202.55	5768	1642.6	3024.98	3114.28	2396.71	838.354	128.798	419.889	9583.23	781.47	-2.347	-17.0951
Endo-2	603	468.5	10052	0	9692.28	179.822	137.85	4.71667	7314.29	229.983	10936.3	345.417	15613.9	2095.81	1829.94	672.361	3344.43	2.41111	6543.4	1890.33	3375.27	2208.97	1965.97	763.506	115.661	536.517	25125.3	490.806	-2.43452	-16.9526
Endo-2	623	486	8040.5	0	44872.1	106.076	44.2842	5.86885	1591.67	124.055	1758.6	119.322	13939.9	1002.96	81.6448	491.175	838.115	49.6284	2223.2	1721.86	2282.27	2246.94	2270.69	531.945	118.29	178.628	2029.05	108.219	10.0304	-15.995
Endo-2	624	484.5	7328.5	0	49158.3	137.515	161.273	41.4545	3887.74	223.533	4539.37	232.836	15935.2	2378.12	141.83	1163.67	788.273	426.842	3885.82	1324.73	2752.87	3510.67	5773.45	2291.25	352.618	3191.08	587.055	140.158	8.3521	-18.3638
Endo-2	640	494	8460	0	44884	95.4127	138.349	68.1905	2438.14	173.968	752.96	146.143	10553.3	1249.22	77.3492	913.992	1114.09	138.897	3239.57	1300.38	3633.52	1445.6	3093.02	771.46	122.151	328.294	1551.98	132.476	9.6256	-16.6767
Endo-2	643	496.5	8025	0	19725.6	121.05	169.411	108.043	1668.4	60.7234	5943.92	129.411	13235.8	1487.7	77.2057	379.241	991.716	320.305	2284.84	935.539	1742.04	1251.19	1427.44	654.191	85.2766	441.915	1806.37	155.972	1.40014	-14.9548
Endo-2	646	496.5	10119	0	22936.2	163.39	63.7642	880.821	2939.99	491.821	7986.1	375.732	42861.1	2097.37	214.561	2109.86	1850.8	190.293	4026.57	2045.77	2210.64	1416.4	2826.31	1789.07	193.236	1126.09	1696.82	1166.93	1.75097	-16.1865
Endo-2	653	505	9729	0	21400.3	150.808	213.327	519.269	6653.87	246.769	9691.44	278.019	9851.07	1712.21	93.7115	1008.88	991.282	132.026	4806.73	1529.62	2919.69	2300.45	4291.34	1017.92	129.692	171.5	1309.58	6122.53	0.838525	-18.5355
Endo-2	661	508.5	7796	0	17949.4	85.3511	43.4149	7.44681	1560.3	88.9894	4666.82	141.872	18040.4	1100.83	74.6915	1486.32	1106.01	170.617	2015.74	823.564	1622.02	1675.23	2526.49	665.223	142.032	794.34	822.904	137.479	1.43688	-12.988
Endo-2	663	509.5	7387	0	8993.24	154.311	298.439	40.0758	3365.05	179.106	16437.5	260.917	13220.4	2644.48	167.008	1134.71	168.045	408.197	3277.67	1268.73	2255.95	2223.39	4203.95	1394.75	211.462	150.038	123.758	161.742	-2.6225	-17.4178
Endo-2	670	514	7400	0	5194.88	143.065	318.724	68.6504	9532.45	445.041	15039.1	296.659	12173.3	2597.13	126.74	1257.59	344.366	360.358	5579.91	1508.76	4406.32	2035.76	4026.32	1140.63	297.374	179.293	159.089	147.537	-2.88066	-17.3141
Endo-2	689	535	9922	0	20035	85.8934	246.426	308.545	5900.74	191.775	10133.5	219.295	8662.41	1565.42	127.389	906.344	883.07	290.033	2527.96	875.967	1676.96	1818.51	2291.71	861.209	137.881	369.963	976.762	532.275	-0.0774805	-16.3415
Endo-2	719	542.5	10048.5	0	12385.6	138.667	64.4103	208.752	5008.56	177.453	7305.75	173.675	11570.5	2041.15	111.504	732	939.179	37.2308	2264.46	1162.16	4363.79	1040.17	2860.63	927.624	101.154	1103.59	463.419	6064.3	0.503398	-17.3648
Endo-2	778	575.5	7835	0	37887.1	99.6173	65.8951	32.2469	5931.72	227.438	2870.32	261.062	9597.82	1631.88	112.796	575.494	665.778	125	2504.96	314.852	2546.88	1038.26	717.549	1846.89	237.136	2996.92	8334.82	144.907	9.93958	-15.2716
Endo-2	784	578	10357.5	0	15871.1	98.7716	22.821	0.91358	6132.52	321.272	10588.5	321.562	9391.06	1799.55	245.389	317.846	25776.7	0.444444	6008.41	551.42	2279.7	2235.89	780.803	953.988	378.556	852.043	35207.8	54.5679	-1.11275	-0.939309
Endo-2	791	581	10220	0	30068.9	67.2381	68.2738	3028.89	4244.45	612.375	6028.96	148.673	8900.58	1268.99	107.565	411.018	645.857	80.1845	2428.67	2436.8	2337.17	2435.61	1526.96	611.792	104.03	598.476	3188.52	897.47	1.56787	-14.9245
Endo-2	793	585	7387.5	0	21342.3	74.6191	41.1385	47.8831	3901.29	166.961	3765.07	183.71	8725.42	1750.74	116.429	593.203	1280.98	72.1905	2773.9	850.182	2264.89	1534.95	3420.32	1035.37	188.446	217.147	2048.38	125.208	4.62612	-14.3188
Endo-2	796	586	10374.5	0	8868.89	61.5417	17.1131	1.23214	5102.89	173.25	10297.7	157.565	10684.8	1668.77	159.417	363.024	24789.6	1.13095	5815.55	854.167	2759.93	2227.58	677.482	1152.48	293.958	353.476	34364.1	67.1548	-1.13748	-0.886274
Endo-2	807	592	9831	0	33213.8	121.144	115.667	261.111	3671.54	225.506	968.439	495.472	7143.67	1699.64	183.833	354.611	912.644	222.617	2169.51	947.861	1247.33	1355.29	1857.81	979.972	147.333	214.017	1045.74	129.467	8.31884	-13.0509
Endo-2	809	599.5	8863.5	0	24081.4	92.5564	0.770428	0.0272374	3670.1	175.767	2745.26	143.965	11663.8	1409.03	221.942	180.689	1963.43	0	4949	995.44	2507.94	1680.51	108.669	474.047	135.735	334.518	32443.8	334.981	11.3826	-9.69932
Endo-2	812	597.5	7798.5	0	25588.4	107.996	101.709	43.6739	2793.57	188.883	5757.6	154.243	12720.6	1536.72	106.552	873.291	762.878	155.061	2874.46	1370.2	2820.16	2193.3	1633.99	762.539	126.022	64.8957	1337.1	1734.47	2.46251	-15.4749
Endo-2	829	602.5	7469.5	0	19246.2	86.2303	190.491	66.1091	3866.16	126.139	301.212	203.885	3941.35	1894.48	84.4606	266.921	661.145	189.188	1822.98	684.63	2304.95	647.339	2280.81	917.273	117.315	93.5455	363.891	102.497	5.26031	-12.7278
Endo-2	850	610.5	7287	0	35230.1	105.175	183.405	52.9206	3146.88	146.262	3443.42	263.468	13593.7	1769.23	88.9841	1103.2	899.595	399.46	2578.06	1067.15	2891.4	2821.87	3356.61	917.651	153.579	879.698	538.206	92.0079	7.33866	-16.6564
Endo-2	855	617	9884	0	18147.8	84.8123	37.7143	68.9469	3219.74	192.057	3286.36	231.396	6855.36	1211.27	118.649	366.531	576.625	98.4082	1914.41	676.253	1796.01	1040.63	1802.18	756.567	120.906	281.988	1117.46	279.784	1.91268	-12.5876
Endo-2	863	620.5	7400.5	0	25975.1	85	216.988	148.006	3826.65	163.163	1857.05	134.308	8034.43	1443.02	72.6802	629.797	300.296	326.081	2108.49	1195.07	2530.56	724.017	4031.78	964.244	110.151	144.57	170.384	70.3953	6.16901	-14.917
Endo-2	865	619	8075	0	22164	101.434	45.1399	1.53846	3498.06	189.266	3825.98	154.86	17341.5	1905.16	130.231	993.601	3047.3	31.6993	3598.35	1543.66	3404.99	2686.78	2503.2	641.035	155.853	619.559	3971.38	214.524	4.66064	-14.2741
Endo-2	866	614	8081	0	41101.7	107.165	53.8987	1.10127	3081.27	302.924	4243.16	175.62	19123	1817.61	148.949	1229.25	3548.25	19.6835	3736.71	1691.06	3912.22	3462.89	1756.05	721.177	210.557	1096.44	3127.53	158.38	9.33257	-17.6981
Endo-2	867	622.5	10429.5	0	32038	69.5707	71.7592	96.178	2749.24	131.77	2096.33	181.503	9871.96	1359.38	109.942	552.246	158.424	89.8796	1644.36	711.618	2095.55	1282.35	1471.73	756.728	107.168	2234.4	321.476	213.843	9.54028	-14.0391
Endo-2	876	626	8346.5	0	22024.1	63.7	66.3412	42.1941	3475.99	205.171	5747.56	171.529	13221.9	1538.76	85.5824	729.288	486.041	101.247	2976.22	1985.74	1939.43	1895.49	2452.25	1106.62	163.459	215.512	635.824	45.2882	1.73445	-15.0849
Endo-2	880	627	7500.5	0	8889.24	75.1792	57.7168	42.1561	1612.49	74.6532	1313.51	121.283	6749.57	1369.9	54.6243	457.63	1168.53	128.74	2135.65	680.445	2205.26	1169.84	2107.36	473.896	73.1098	142.376	1286.88	115.763	1.38525	-10.3894
Endo-2	893	628.5	10596.5	0	27333.5	118.337	94.5054	152.304	5617.55	417.315	2129.92	347.141	7544.02	1733.54	242.163	474.924	1447.27	176.141	2467.84	458.397	1990.53	1180.67	485.674	1092.27	204.864	2592.2	1116.66	158.522	4.59101	-13.5018
Endo-2	907	635	7393	0	23138.1	93.8207	110.788	32.4239	5267.24	201.424	3570.36	210.299	12427.5	1560.39	82.7174	897.902	526.533	212.103	2666.94	1205.68	2162.74	1404.74	5779.78	1218.82	140.897	371.766	471.788	98.2772	5.67802	-15.8009
Endo-2	934	653.5	10344.5	0	31018.2	135.571	144.37	1491.49	5198.67	335.603	6039.04	202.73	15427.6	1509.26	106.989	1217.59	1467.72	248.778	3240.21	2615.87	3758.6	2422	3682.2	591.688	117.825	778.714	1703.85	1004.24	6.76377	-17.6644
Endo-2	939	654	9740.5	0	33651.7	61.9762	216.542	1565.82	2695.12	318.369	2831.83	377.643	6761.46	1645.37	108.161	1038.86	483.185	275.804	1698.82	949.827	1132.63	680.911	2179.56	862.113	111.435	338.929	330.494	86.2202	8.49697	-13.6386
Endo-2	979	667.5	11211.5	0	20151.1	145.414	25.4848	31.7273	1138.29	59.8384	2131.2	62.1212	8397.1	633.354	44.5455	410.202	202.788	85.0606	1962.03	465.717	1628.99	2385.03	2242.54	130.303	21.9091	440.091	527.01	4308.14	1.28819	-12.5305
Endo-2	1013	680.5	9988	0	42356.7	45.3846	154.885	534.731	3023.37	115	2122.23	131.923	11053.7	1560.51	137.718	1019.01	352.167	497.308	3305.5	504.5	1276.22	1208.83	6249.23	775.115	68.3974	198.051	274.577	254.564	6.4889	-16.3558
Endo-2	1033	693	10591	0	16610.9	107.961	170.739	184.673	4847.8	77.451	14905.8	132.15	10753.3	1622.01	105.183	1046.27	272.078	270.641	2157.93	865.562	2058.2	2860.43	2068.12	423.98	52.6601	150.922	490.046	792.451	-1.14622	-16.9564
Endo-2	1049	695	10610	0	25861.1	96.5258	309.072	148.515	4130	128.381	5259.46	108.216	7299.46	1829.59	138.557	915.021	116.464	297.845	3266.33	1169.92	2467.91	2170.03	2355.67	580.639	84.2165	151.814	2239.46	362.918	3.58269	-15.0105
Endo-2	1053	700	10657	0	17533.5	78.0873	97.0476	50.9524	3953.14	59.4524	4872.74	155.159	7152.07	1601.32	137.167	789.198	1483.94	162.294	1566.99	848.349	1556.42	1892.32	3264.79	409.46	51.7857	217.214	1317.23	363.635	1.85458	-13.0936
Endo-2	1064	703.5	10484.5	0	15883.2	101.124	12.6899	137.341	5515.73	302.488	2626.13	246.504	7199.78	1161.62	317.14	148.403	3404.71	6.2093	4136.76	585.822	2253.95	1750.13	181.186	286.907	131.147	502.884	31606.3	148.186	-3.44736	4.84735
Endo-2	1067	708.5	9717	0	28412.9	90.8564	14.6782	16.599	1605.23	176.059	1125.63	172.926	9171.2	1249.55	109.183	412.802	626.807	4.98515	1784.24	719.515	1900.51	1217.31	623.351	391.906	38.6733	334.094	4814.76	132.109	9.26573	-11.9573
Endo-2	1088	713.5	9038	0	26739.2	73.9492	22.7462	5.47208	5239.77	163.629	4512.53	197.01	12671.6	1540.9	88.6903	1052.01	514.731	60.4061	2583.87	1614.27	1420.76	1548.42	2991.64	403.076	141.193	110.32	409.523	162.975	4.49702	-14.9207
Endo-2	1119	720.5	8440.5	0	26451	77.1808	16.7514	625.706	3161.95	398.463	1726.57	120.192	13402.4	1450.9	130.051	576.305	909.226	43.0678	2506.85	2455.54	1840.51	1605.53	3961.97	535.785	113.537	1300.11	2596.59	390.701	6.32497	-14.8388
Endo-2	1121	717.5	9769.5	0	21321.5	95.5093	52.7685	4.52778	4252.39	190.407	4824.81	114.296	10002.6	1542.06	160.324	396.676	428.685	4.63889	2844.05	1106.71	2500.69	1677.43	1042.65	551.537	85.3982	282.694	3462.1	181.676	2.32953	-14.677
Endo-2	1153	749	10501.5	0	22415.7	108.339	65.7129	62.4258	4515.36	166.361	3028.39	209.7	8665.83	1913.63	223.41	369.819	2448.52	34.7452	3893.97	807.942	2560.64	1760.09	876.642	868.758	144.455	271.294	18204.7	2669.82	3.60043	-13.7197
Endo-2	1156	742.5	7383.5	0	18412.7	61.9177	212.082	4.04706	7027.49	99.0941	2067.94	123.412	7643.75	1254.55	115.029	366.559	1158.06	19.0647	2330.83	641.294	2674.02	1349.54	1426.28	336.829	91.6059	581.606	2325.91	240.618	5.82452	-11.3909
Endo-2	1159	746.5	9182	0	13130.5	107.32	61.1598	35.9845	4049.73	152.649	2556.02	169.005	12010	1247.26	120.701	638.057	688.021	105.541	2661.29	633.871	2096.75	900.624	994.278	647.026	65.5773	120.49	1178.4	3465.44	0.4283	-13.3404
Endo-2	1169	749.5	10187.5	0	11974.9	89.2766	112.291	191.39	4081.37	175.461	5014.84	200.518	26152.7	1656.27	115.56	1175.67	961.199	311.979	2400.01	467.319	2252.46	2139.43	1183.09	1115.23	118.411	408.199	808.667	368.149	0.14034	-13.8259
Endo-2	1173	751	9499	0	22052.7	63.7158	111.262	239.661	4144.97	117.104	7495.02	137.366	4115.52	1553.28	90.6284	510.82	4027.89	155.536	3500.55	1297.13	2616.31	938.65	2279.56	881.279	71.6503	587.06	1392.27	331.18	1.51519	-15.6781
Endo-2	1178	758	10435.5	0	20967.5	70.5067	36.5022	97.5911	5363.85	178.876	6881.71	211.729	13597.2	1397.37	91.9822	917.893	765.653	102.231	2728.29	784.924	1781.7	1673.32	2173.12	671.787	105.08	676.267	523.098	616.147	1.34659	-15.4736
Endo-2	1181	752	7926	0	1317.68	95.2133	57.2	1450.7	6558.66	263.033	12494.1	127.313	7714.19	1326.5	71.1533	505.96	644.56	36.0933	2168.03	1321.82	2390.17	1621.57	835.307	370.34	94.7267	561.32	733.433	2417.47	-1.99476	-16.4104
Endo-2	1191	754	7850.5	0	31658.2	91.1212	335.576	543.182	1182.39	63.6212	522.53	183.955	5737.29	1641.35	40.3788	603.303	684.894	453.97	1763.76	1751.47	1681.48	419.788	3091.06	702.03	154.439	499.182	152.985	72.5303	7.32378	-13.9915
Endo-2	1192	757	9626	0	35602.8	89.0705	100.237	143.429	3084.72	142.667	2949.83	235.244	12324.2	1023.68	100.462	831.679	445.776	147.071	1323.61	633.006	1283.35	1189.76	1320.56	434.301	50.1795	154.474	905.756	125.429	10.0939	-13.2032
Endo-2	1207	769	8535	0	20356.7	58.9327	65.7404	71.6539	4473.11	147.611	871.928	109.558	8977.01	1148.51	94.7548	491.096	843.923	167.159	1871.77	939.24	1537.31	885.466	3993.62	459.538	126.774	224.524	1042.85	102.712	5.62108	-14.3525
Endo-2	1260	787	10172.5	0	8993.22	74.5455	26.4343	10.9495	6498.61	145.889	1405.07	163.364	8277.26	1724.84	112.687	275.788	831.242	49.1616	3073.51	893.131	3047.05	887.04	3119.78	785.798	108.232	163.061	1012.41	360.737	-8.50105	-14.2799
Endo-2	1282	796.5	10173.5	0	8981.67	157.656	61.2188	44.1458	6757.33	140.042	1040.02	231.917	6619.26	2010.29	170.25	322.75	1108.04	61.1667	3005.82	792.427	2603.18	776.823	2496.81	842.302	155.906	134.365	958.49	348.469	-2.55215	-8.62304
Endo-2	1317	817	7493.5	0	30297.3	135.126	91.847	67.8033	2597.62	154.18	2803.83	202.158	10121.7	1684.64	94.4754	805.667	834.514	208.842	2477.99	934.481	2765.97	1596.35	2518.7	588.268	132.011	194.23	637.005	506.705	7.15405	-14.8209
Endo-2	1320	820.5	8113.5	0	25565	67.1833	173.244	95.0444	3513.47	143.639	873.511	107.583	10228.5	1128.88	124.333	424.006	977.733	89.0833	2559.24	1048.24	2687.31	1137.93	2664.04	309.472	102.183	195.194	1220.07	83.9556	6.60856	-13.5593
Endo-2	1353	839.5	10456	0	21834.9	99.4103	134.856	384.872	3438.85	273.092	2151.77	332.354	6845.39	1777.68	146.385	474.262	1018.91	379.492	1983.84	391.99	1334.24	695.59	1688.32	1811.16	175.113	206.954	301.769	225.056	5.86354	-12.4495
Endo-2	1361	838.5	8174.5	0	16004.4	70.9358	1.43119	0.440367	3163.39	99.8349	506.239	46.422	15019.8	1512.82	445.376	201.312	4804.83	2.9633	5037.35	1430.1	2416.1	793.844	1212.37	523.275	78.7431	77.8991	28828.6	66.2844	-3.63246	4.35533
Endo-2	1397	861.5	9904.5	0	50801.8	149.913	123.667	116.029	1355.65	187.667	3953	97.4783	38155.5	1464.32	97.4783	1912.64	574.232	376.899	1120.64	800.565	5395.49	3410.55	1382.2	566.913	92.4348	119.261	500.29	56.7101	9.89469	-18.5757
Endo-2	1403	874	7667	0	47822	115.011	123.778	267.972	3290.04	223.072	6637.66	240.561	21037.7	1987.39	116.078	1609.95	765.289	508.378	2897.67	2143.47	4003.04	2286.74	2338.21	1226.23	176.139	1252.14	842.9	223.428	8.64383	-19.3431
Endo-2	1405	877	7367	0	25200.3	83.3039	24.3149	21.9116	2924.02	140.646	3597.81	111.033	5752.73	1186.81	99.5691	321.934	1033.03	45.4475	2837.93	1057.88	1690.17	785.641	3554.82	622.006	83.4696	124.735	3376.49	2282.68	5.63126	-14.3496
Endo-2	1416	876	9441.5	0	11496.2	49.5766	373.27	218.288	2314.91	125.802	10047.2	78.036	14484.3	1267.48	67.4595	969	1265.36	284.748	2756.88	243.189	1852.1	2510.41	801.09	550.595	75.2883	608.973	1141.71	1532.49	-1.22457	-16.2257
Endo-2	1417	879	9545.5	0	42305.2	95.7386	340.477	965.909	4192.85	425.438	2155.73	211.523	11284.1	2163.44	181.954	1094.75	996.281	275.124	4196.56	2479.83	3330.41	2381.78	3218.59	1311.12	147.464	1093.58	5843.68	245.804	9.06477	-17.9426
Endo-2	1430	887.5	7555	0	29666	139.139	53.7512	6.59701	3893.03	229.731	3503.78	160.891	14035	1683.93	225.502	780.298	740.269	124.239	2923.38	1322	2619.29	1523.49	3740.05	843.264	146.323	373.294	838.313	786.279	6.39949	-15.3575
Endo-2	1435	895	7817.5	0	20987.5	165.367	72.278	513.707	2548.24	209.467	8429.07	188.919	20703.1	1362.05	65.973	882.066	785.884	178.575	4663.63	1524.65	2897.66	2195.58	3483.61	1385.33	164.286	2306.21	946.907	7637.68	0.809801	-18.8068
Endo-2	1442	893	8766	0	32598.8	119.498	137.143	52.7848	4388.01	213.072	8033.62	136.827	14979.7	1868.54	136.84	1036.17	529.274	186.498	3437.62	1857.14	2482.48	3091.18	1766.4	768.709	127.996	182.232	646.671	1437.15	2.61088	-17.0657
Endo-2	1444	898	9540	0	24355.5	84.2333	273.6	317.305	4933.68	201.281	1422.22	201.51	8433.54	1673.81	82.1571	769.886	665.5	271.219	2792.07	1255.27	1742.09	1665.57	3742.95	892.686	92.3	160.271	284.162	152.948	6.16841	-14.7037
Endo-2	1454	895.5	6747	0	24118.6	62.1034	45.092	41.9828	3844.95	94.9943	259.149	88.0862	8702	1300.3	75.454	303.563	1283.87	48.1609	1219.79	688.195	3076.83	774.31	2266.96	177.948	69.7529	738.333	709.977	509.948	6.8507	-12.8347
Endo-2	1461	899	10065	0	50633	95.7895	10.7427	1220.09	1489.25	261.854	1910.03	258.088	13807.2	1536.81	133.649	512.246	712.62	40.4327	2271.71	3507.77	2296.66	999.684	1334.31	779.012	125.018	1413.87	322.205	81.9883	10.455	-16.7368
Endo-2	1468	900.5	9528	0	47538.7	93.2308	120.269	311.769	6035.94	209.558	1502.83	205.625	16162.8	1409.2	95.9327	1003.96	966.942	344.875	3793.8	1607.94	2211.21	4362.81	2115.64	700.769	89.3654	407.99	677.317	166.462	10.5015	-16.7185
Endo-2	1469	907.5	10584.5	0	20407	95.0901	3.5782	2.60663	4751.15	100.602	1993.48	152.142	6722.97	1378.95	232.118	59.5972	2541.37	0.981043	3521.8	498.137	2022.09	1377.84	105.853	498.654	85.7156	198.417	11803.9	159.403	6.71105	-10.1985
Endo-2	1476	907.5	11424	0	14587.3	190.064	32.7255	59.0637	1150.37	109.613	2255.8	64.3726	7145.32	1222.21	58.0392	190.544	681.216	71.3039	2154.49	388.495	2355.03	839.877	1058.44	219.73	26.0637	83.2255	603.054	3861.41	0.477261	-13.3617
Endo-2	1481	908.5	8650	0	17820.8	63.5938	51.8542	31.75	4386.48	234.203	3067.05	145.573	17287.1	1564.49	109.062	851.068	887.88	93.6979	3187.47	995.839	2742.26	1640.56	3288.82	676.214	145.349	119.573	1342.92	126.906	4.65695	-14.0427
Endo-2	1499	917	10746	0	28377.1	72.0106	29.9894	108.154	2591.25	125.431	1117.41	187.819	6174.01	1396.19	192.947	494.894	6556.76	90.5532	2414.47	718.324	1506.94	767.388	1365.52	640.378	116.766	201.777	7432.83	110.484	8.42084	-11.8995
Endo-2	1511	922.5	8552.5	0	35107.5	117.52	52.3672	19.1412	2843.45	182.48	5577.25	118.011	25436.3	1665.94	101	1067.31	958.571	72.4689	1929.78	955	1761.81	2179.15	3792.36	748.04	137.367	1391.35	1024.91	2507.69	6.73084	-17.2686
Endo-2	1542	934	11494	0	37180.4	253.526	22.5962	12.4744	4338.2	277.718	4517.69	100.635	9395.43	1347.99	104.904	172.987	2339.8	25.2949	5704.41	2017	3353.25	1861.66	5962.83	747.769	141.692	576.737	39130.6	3260.8	6.73462	-16.709
Endo-2	1545	933.5	8346	0	17806.8	112.383	155.981	38.5247	5650.64	178.068	4226.91	153.556	16634.6	1913.89	92.9136	1240.34	896.537	125.519	3400.28	732.753	2522.49	908.265	1092.58	526.741	113.852	96.216	808.599	118.253	1.98671	-14.0423
Endo-2	1547	932.5	10140.5	0	14615.7	73.8691	0.0952381	0	1241.13	92.4643	12514.4	139.631	15879.7	967.595	160.381	249.262	3705.02	0.547619	2429.39	844.524	1421.94	1434.51	340.774	203.024	89.5119	289.381	9084.43	409.095	-1.18686	-16.5553
Endo-2	1549	935	9626.5	0	31637.6	102.358	4.82099	83.7654	2256.51	206.926	1885.07	191.765	14726.3	1125.71	123.111	350.247	268.815	24.8889	1505.55	647.907	1832.4	839.537	1038.56	553.772	119.827	203.457	663.154	97.8704	9.65213	-12.6016
Endo-2	1560	941.5	8332.5	0	23070.1	129.082	94.6395	102.66	5517.46	183.51	3117.17	158.456	12498.1	1428.07	103.497	731.551	883.401	65.9728	3047.76	691.864	2211.8	1215.16	1290.81	672.327	135.429	124.816	923.735	182.619	3.81588	-13.8891
Endo-2	1562	944.5	10103.5	0	16038.1	98.914	9.34409	5.92473	4210.88	169.806	13744.1	160.237	12242.6	1217.83	145.608	325.984	3780.89	1.09677	3584.78	822.608	1769.42	1321.89	540	528.629	142.925	239.306	7773.82	172.478	-1.15494	-16.6308
Endo-2	1581	953	7267	0	20196.3	63.4952	40.3654	127.226	2549.5	245.649	1963.09	160.236	18989.9	1231.51	80.8221	598.625	584.688	82.274	1650.42	611.587	1589.6	867.803	4215.61	878.644	140.043	145.428	967.101	134.327	5.62306	-14.6047
Endo-2	1585	957	10514.5	0	29252.6	91.3005	8.96721	316.235	4376.94	218.667	4094.81	220.049	7256.72	1069.63	110.71	230.443	1133.45	24.2404	2489.85	690.35	2280.33	1376.16	502.24	490.47	117.481	515.344	9072.85	214.24	3.62069	-15.2211
Endo-2	1612	966.5	9004.5	0	30954	106.186	81.5141	81.8475	4315.29	198.977	1827.88	181.638	12141.1	1562.4	84.8588	663.277	838.972	126.904	2824.57	908.847	2261.11	1104.52	1129.49	581.859	87.8644	133.734	710.621	63.9548	8.95794	-13.1638
Endo-2	1619	969	11617	0	15814.9	218.08	152.409	128.679	4208.46	149.582	2214.11	133.743	7673.62	1086.7	144.148	310.211	14666.3	175.435	5215.95	736.24	2824.03	1092.43	728.38	349.177	192.886	419.679	34071.1	183.485	-3.207	4.80005
Endo-2	1621	968.5	10091.5	0	5373.87	94.4498	31.8153	84.7229	4875.39	320.141	11519.8	301.96	11993.7	1811.45	187.273	613.96	5489.27	8.72691	4962	942.374	2048.62	821.378	1699.1	1265.07	111.301	270.88	18525.9	153.357	-2.49466	-16.1822
Endo-2	1623	971	7034.5	0	31673.9	76.9821	38.7738	99.6071	1628.1	106.31	801.131	84.9881	10961.9	1214.82	99.5119	620.357	714.125	116.548	1256.23	611.833	1451.92	692.304	3232.67	469.19	93.9405	141.488	472.238	299.607	7.40573	-13.7567
Endo-2	1628	969	7019	0	20900	44.8077	35.6923	28.859	6248.6	130.897	2069.17	136.577	2509.96	1074.08	94.2051	142.013	671.231	71.7692	1317.77	371.064	3304.77	209.705	3252.56	276.218	88.8077	119.449	468.282	2144.7	5.73936	-13.9579
Endo-2	1642	976.5	7323.5	0	14681.9	107.748	26.0654	2.7757	3231.82	145.43	4932.94	148.299	9480.3	1475.1	44.6262	663.822	1084.28	139.224	3090.21	550.009	2452.47	1185.41	1562.98	808.299	135.57	142.009	928.047	2552.31	0.347437	-14.2577
Endo-2	1654	982	10240.5	0	9508.32	106.605	79.9912	176.447	1934.9	174.246	1335.27	207.088	13145.5	1815.73	166.956	337.833	1250.37	69.614	2213.25	372.395	2364.12	768.763	2647.18	718.702	161.272	87.6579	1113.67	121.956	-2.49007	-8.70884
Endo-2	1660	998	11620	0	24689.6	279.767	244.859	264.43	5639.07	172.385	4064.26	140.985	9718.94	1358.9	93.3741	535.867	2630.05	406.063	3832.49	1002.67	3096.48	1632.73	1924.95	530.67	150.804	253.826	7789.43	178.8	3.87493	-14.5633
Endo-2	1680	994	9444	0	15476	70.0813	74.5122	112.48	3793.94	139.285	5230.57	165.577	9906.58	1725.02	79.6504	519.244	1055.89	195.602	3335.7	1086.28	2580.35	1981.33	825.951	780.683	86.9512	145.187	834.667	2465.89	0.591362	-14.3909
Endo-2	1749	1025.5	10080	0	40180.9	85.5095	89.9524	126.967	4353.87	141.295	2403.66	191.867	9134.9	1458.93	123.91	639.976	860.49	190.324	1805.89	731.143	1549.42	530.176	1812.55	969.314	80.281	380.319	693.643	108.6	9.66875	-14.687
Endo-2	1782	1043	7098	0	29051.5	49.3687	249.005	161.879	2499.69	106.303	1608.19	98.8485	6161.73	957.813	61.7576	344.379	1028.62	175.091	2358.17	824.914	2916.54	664.904	5723.43	448.323	50.2273	432.662	576.626	3618.36	6.02672	-15.8089
Endo-2	1797	1045.5	9860.5	0	22673.4	82.0333	117.944	1213.43	3491.07	318.867	8607.37	239.028	10763.8	1784.98	107.583	716.572	1071.29	184.5	2346.72	1077.37	1471.41	779.083	2007.77	994.422	125.283	250.95	3039.09	1092.28	1.40778	-16.0716
Endo-2	1807	1042	10741	0	24377.8	47.9596	0.686869	0.333333	722.444	72.4848	1633.17	101.475	12381.5	501.505	57.0606	159.02	136.313	8.35354	508.515	564.313	1005.6	657.768	954.374	210.434	67.3333	786.475	185.303	199.222	8.40174	-8.85061
Endo-2	1834	1062.5	9823	0	37464.9	102.426	122.783	446.689	2794.76	198.061	8217.67	182.992	15487.5	1356.07	91.8361	751.09	734.459	84.3566	2524.36	1505.92	2396.65	1681.66	1756.31	737.553	117.82	802.898	1212.59	1403.57	6.72542	-19.2024
Endo-2	1856	1071	7320	0	17750.2	123.953	125.328	31.4531	3922.67	273.777	4008.42	203.828	12026.7	1867.51	112.867	818.059	1155.87	161.609	3883.88	749.602	2308.75	1341.05	3722.54	1056.68	140.215	370.477	761.43	1819.75	4.35078	-14.3352
Endo-2	1857	1066.5	9897	0	19183.2	92.9748	189.264	1374.01	3542.11	328.371	2450.9	309.094	8621.87	1665.12	121.226	710.799	481.113	342.233	2313.64	473.88	1349.44	848.906	1848.7	944.094	127.019	102.44	212.101	76.9811	4.51918	-11.3501
Endo-2	1859	1070.5	7804.5	0	20800.9	110.301	270.487	147.756	3624.8	137	2984.27	178.237	18189.2	2027.71	67.3013	1104.22	968.429	392.609	1729.33	680.333	1679.05	1876.8	1871.79	1152.84	177.205	148.481	150.622	117.09	4.18776	-13.4024
Endo-2	1862	1068	8566	0	17865	81.6032	27.9603	17.5397	3341.93	201.151	9648.4	170.873	9148.7	1311.71	111.286	695.294	1170.42	57.746	2404.1	817.198	1176.42	893.365	1004.99	899.937	125.81	152.214	4003.55	138.024	-0.702326	-16.1531
Endo-2	1863	1067	9351.5	0	21062.1	101.478	21.9638	4.83333	4818.69	181.913	6581.79	169.326	23020.6	1145.49	94.0217	518.406	643.609	25.1087	2836.36	498.348	2478.55	1346.52	864.399	476.536	105.174	18.3261	1632.64	3456.85	0.720377	-16.2222
Endo-2	1873	1069.5	11333	0	39347.4	102.885	29.375	4.33333	1203.97	52.1979	2170.92	48.0521	8330.73	911.594	28.125	178.958	1355.06	39.8229	2279.45	378.333	1991.16	1188.76	99.1979	48.9583	38.7396	375.844	4333.55	426.802	10.9212	-13.6266
Endo-2	1879	1079.5	8949.5	0	13555.9	80.1094	118.811	81.7512	4712.92	204.846	8759.5	134.826	10030.9	1660.17	108.468	1095.11	1598.56	224.637	3087.3	1034.07	1575.04	1716.95	3982.08	849.796	178.179	153.493	1532.61	3862.45	-0.624829	-16.7601
Endo-2	1894	1081	11327.5	0	34719.9	267.496	234.946	171.907	3699.24	87.7054	2649.98	123.465	8765.6	1906.87	119.651	563.907	644.868	329.225	3053.12	640.481	3249.71	1203.5	492.419	116.039	57.5736	145.403	2803.2	264.403	9.33803	-14.9207
Endo-2	1912	1089	6780.5	0	27527.2	54.2727	3.54545	0.212121	3729.12	139.298	3894.7	157.581	11750.9	1351.15	95.6919	396.55	3005.18	6.31313	2772.9	902.727	2866.34	1332.87	879.096	882.485	154.98	246.545	12053.2	150.328	3.62908	-14.8656
Endo-2	1913	1083	7329	0	27313.4	83.7778	119.542	195.069	1527.15	131.736	114.361	197.653	5090.33	1316.4	51.3889	377.778	757.958	231.833	1209	550.264	1653.28	985.264	3410.76	539.694	107.264	513.736	521.222	135.847	6.86725	-13.8923
Endo-2	1928	1095.5	11309	0	21153.3	138.667	68.2536	53.2754	1817.36	169.413	2481.24	117.696	6270.43	583.413	38.1159	220.065	1119.68	108.797	1283.49	347.123	1350.88	854.174	355.601	388.355	103.051	112.457	2435.54	149.384	7.92439	-8.17944
Endo-2	1931	1098.5	10056.5	0	35625.1	104.036	82.9048	58.4464	2978.08	149.5	1816.95	194.042	24682.8	1615.17	130.065	1124.93	1611.4	189.97	3474.64	963.679	2614.24	1975.58	1860.36	595.018	108.827	1091.6	1274.18	154.78	9.28914	-15.2619
Endo-2	1938	1100	9965.5	0	38809.4	153.535	118.662	75.5808	3704.6	141.934	1678.43	364.308	11764.4	1865.31	188.561	650.404	1195.48	308.157	2960.99	1031.56	1813.93	1056.08	2892.92	1275.64	127.197	556.288	799.263	86.4444	8.67035	-15.4385
Endo-2	1943	1102.5	10659.5	0	42507.2	121.812	2.15	12.3542	3370.31	204.912	5720.42	217.083	18856.3	1148.42	120.758	292.654	716.492	26.8208	2893.11	898.496	2045.17	2495.28	730.229	559.829	173.971	525.925	1616.48	482.292	7.38384	-18.5911
Endo-2	1948	1105.5	9845	0	27030	153.478	38.5389	11.5444	4264.36	254.828	1660.97	275.833	18746	1908.93	208.05	472.6	21271.7	59.0611	4773.18	1254.77	1820.31	1178.42	1432.37	1079.62	208.844	188.272	14681	85.1111	7.9741	-12.1946
Endo-2	1951	1105.5	8871	0	21870.8	63	82.7056	22.5787	6807.6	189.096	3192.11	134.548	8237.46	1674.18	103.452	520.68	1158.33	100.711	2432.55	819.34	3088.72	883.416	2750.58	410.03	134.066	163.264	1349.77	134.198	5.02704	-14.0066
Endo-2	1953	1106.5	9776	0	18843	73.1445	170.628	20.5389	1595.61	109.544	4985.87	172.872	10625.7	1082.58	93.85	606.767	364.978	121.561	1481.19	405.161	1349.96	704.833	353.233	325.556	71.3278	91.1389	543.85	232.856	-0.345052	-13.4395
Endo-2	1977	1119	9236	0	11412	102.617	22.5078	26.0777	1653.79	111.425	4479.07	174.902	19328.9	1290.65	95.7927	815.114	784.041	77.4508	2198.3	503.839	2499.69	1505.58	888.668	515.466	80.9016	147.28	773.005	2866.76	0.200746	-14.0323
Endo-2	1983	1122	7860.5	0	34776.6	105.79	84.1916	50.7757	3571.63	242.818	6386.34	194.229	11834.5	1605.89	73.0654	899.729	809.692	128.164	3129.74	2156.24	2480.06	2178.5	3721.48	1026.71	173.85	366.14	964.766	173.103	6.81386	-17.2189
Endo-2	1992	1121	7532	0	13770.7	88.0217	139.739	154.935	6613.97	322.37	8526.36	295.71	57739	2039.96	448.891	3411.42	612.928	407.406	3123.64	1173.51	1772.91	1592.33	3500.92	1710.2	135.848	121.478	433.536	264.101	-0.0452186	-15.9004
Endo-2	1998	1127	8499.5	0	46590.4	75.3302	3.05263	274.311	2043.99	222.689	1226.85	105.699	9681.82	1298.54	84.2632	295.675	2182.25	38.6172	2323.04	653.01	2053.25	914.541	627.679	659.402	165.483	1179.53	8823.56	92.3684	10.4614	-15.9402
Endo-2	2006	1133.5	10292	0	15054.1	76.3908	69.7731	121.66	6846.54	196.513	5191.07	252.433	10649	1557.48	134.269	460.256	4730.1	89.6008	3637.4	821.45	1829.41	777.429	714.601	1038.62	180.353	106.803	15824	2016.9	-0.19209	-12.8356
Endo-2	2009	1130	10409.5	0	21804.5	91.6981	49.2642	99.7296	2166.25	262.088	2615.13	293.736	8853.11	1870.11	166.836	517.943	1021.19	101.27	2561.74	926.05	2697.79	1075.74	2014.79	1262.16	237.075	401.679	503.013	118.811	4.76186	-13.4614
Endo-2	2026	1141	9162	0	34305	77.4108	89.3682	1591.64	3386.22	229.411	6321.45	217.992	14411.7	1476.91	123.023	753.151	1741.11	105.403	2557.19	945.295	2028.53	1545.02	4981.41	810.5	107.671	2719.6	3184.31	2466.29	6.50447	-17.2917
Endo-2	2030	1138.5	7902	0	36458.2	73.607	17.4776	34.0547	3544.41	141.328	2247.84	159.632	12707.2	1643.85	83.5323	615.055	1129.36	71.6667	2778.11	1112.92	2820.59	1689.27	2045.84	820.552	149.905	122.512	1182.61	151.786	9.13921	-15.3536
Endo-2	2034	1137.5	8567.5	0	23143	104.109	29.2171	993.737	2360.66	222.36	1664.24	130.6	7733.11	1461.24	108.737	337.486	462.314	111.594	1137.46	615.709	1419.54	684.983	1208.47	667.68	106.389	280.429	517	55.8286	5.89345	-11.7573
Endo-2	2045	1135	11682	0	30610.4	111.03	8.54546	44.0606	2992.53	77.2929	4278.74	60.7778	14893	383.545	52.1414	177.232	271.01	238.646	2734.24	506.525	2424.31	1041.58	1240.05	167.04	58.9192	639.202	949.596	165.879	3.79017	-15.6581
Endo-2	2054	1141	6241.5	0	11732.4	42.103	36.6	9.07879	2445.74	148.533	3938.71	196.497	20741.5	1134.9	104.927	1137.85	6892.84	64.4485	2978.59	671.915	2765.88	1334.21	3498.89	1008.19	120.77	341.915	4016.28	133.242	1.63973	-12.6503
Endo-2	2056	1142.5	7453	0	18995.7	114.949	6.80508	0.0423729	2285.49	96.1441	738.712	73.3305	16367.9	1423.04	672.797	451.661	4288.84	1.98305	4070.87	687.805	2199.72	1836.23	972.119	574.898	115.669	300.144	11143.3	462.246	6.39244	-10.5217
Endo-2	2065	1147	11696	0	20216	91.5976	22.8994	120.491	1529.91	75.3787	3551.4	51.0059	10622.4	300.438	25.6923	193.178	174.107	106.929	1695.5	352.935	1217.99	878.314	949.858	220.71	55.2899	468.704	889.272	129.367	8.03224	-8.00417
Endo-2	2066	1146	6196	0	22363	64.3419	197.043	236.291	8464.32	212.333	2551.19	250.359	22924.4	2369.61	135.205	1945.61	1179.62	572.367	5190.77	926.103	3536.89	1585.5	3931.58	1127.52	108.624	3135.72	948.838	95.7521	5.3364	-14.8301
Endo-2	2079	1156.5	7921.5	0	23772.3	119.285	36.2	10.097	3695.92	142.491	7733.61	224.939	18036	1260.52	66.2545	843.091	802.903	115.515	2496.61	1064.98	1726.27	1603.87	1477.56	1196.83	173.158	593.261	523.467	161.073	1.44376	-15.8154
Endo-2	2087	1163.5	6209.5	0	31804.5	57.7412	182.899	77.864	4324.77	133.496	2297.76	167.596	14390.2	1300.05	93.5395	1449	838.741	341.667	4396	1277.52	3812.94	1287.97	4957.62	645.838	120.531	4229.64	429.947	116.592	6.62449	-15.9193
Endo-2	2089	1159.5	6731.5	0	357.267	91.5667	2.05833	2.94167	6556.23	260.108	10756	180.558	10018.3	1822.07	163.475	897.008	1350.08	11.2917	2748.07	828.642	2641.1	1692.69	2533.82	1515.03	186.15	71.5417	5212.6	423.067	-2.94151	-16.3336
Endo-2	2093	1163.5	10300.5	0	32515.7	104.366	15.4049	1200.56	1939.78	249.927	8836.44	213.844	16534.2	1137.61	111.439	687.21	710.181	175.878	2001.99	518.971	2259.92	1422.69	1081.75	629.249	104.902	872.449	1303.54	422.624	2.90035	-16.7212
Endo-2	2094	1159	8548.5	0	19543.3	208.049	56.6049	1590.04	1282.33	187.901	1449.01	84.1111	4058.54	1145.61	69.1111	354.457	546.691	70.321	1695.17	400.444	1597.38	568.432	894.124	117.963	77.1975	873.876	1489.88	242.259	4.11314	-9.93854
Endo-2	2096	1167	8566.5	0	36895.8	210.673	60.8628	2129.88	1676.23	236.164	2205.47	137.965	8054.47	1228.47	90.0575	567.996	513.332	170.053	1071.93	491.049	1243.3	609.473	898	691.743	153.248	1048.55	503.704	98.9602	8.94022	-13.7304
Endo-2	2098	1166	6720.5	0	5756.1	51.9177	2.27848	2.91139	3585.42	187.234	13181.2	168.456	15814.1	1571.2	132.449	1390.65	927.487	32.6835	2202.41	707.114	2477.24	2272.11	2106.37	1527.74	157.69	93.5823	1185.89	613.494	-2.09997	-16.5059
Endo-2	2110	1168.5	11269.5	0	29997.8	122.719	12.2456	36	559.395	97.0526	4443.39	45.5	8203.86	645.535	33.1403	120.368	58.0175	47.386	1303.67	281.737	1961.89	909.588	174.93	87.1403	39.9123	63.3421	170.465	223.877	3.67958	-15.5174
Endo-2	2116	1187.5	8272.5	0	11851.7	88.0459	13.0765	18.2905	4202.98	201.147	1124.8	131.018	9232.17	1448.53	187.229	207.086	5302.82	16.0703	6081.82	1202.5	2289.87	742.56	2364.32	587.092	122.477	225.664	26667.1	88.3823	-3.66369	3.14876
Endo-2	2126	1183	10704	0	23298.4	101.876	8.17455	166.564	3108.89	195.916	6076.2	220.6	15911.8	1706.18	161.149	245.727	937.436	75.7054	2730.83	748.345	1687.01	1899.62	1314.47	702.436	165.662	428.844	3214.35	398.8	1.68115	-15.2409
Endo-2	2137	1182	9613.5	0	20919.3	84.375	389.03	326.625	2245.79	214.405	12608.2	203.863	7918.97	1474.12	125.756	770.048	778.286	240.024	3202.43	952.048	1498.88	1377.57	1391.58	757.905	82.9167	93.7679	631.827	1462.2	-0.347127	-16.8449
Endo-2	2149	1183.5	8014.5	0	22166.1	72.7361	52.4861	9.49537	4094.05	223.162	713.116	200.847	19383.9	1336.84	94.1991	537.537	1552.72	84.8056	1875.44	1032.3	2391.49	1041.32	1283.52	1089.03	148.231	128.708	1711	104.778	6.88785	-11.4716
Endo-2	2163	1187.5	11108.5	0	18359.3	97.5035	191.566	71.9236	1597.4	95.0972	4546.18	76.8403	5318.56	683.965	63.9757	357.562	466.163	375.931	1813.02	464.767	1419.68	1218.71	1452.09	176.208	79.1771	405.198	454.611	70.6319	0.0294853	-13.454
Endo-2	2164	1190	11369.5	0	38741	114.915	131.697	47.1327	1398.75	60.109	7605.21	32.3886	8538.55	512.436	15.8104	292.739	250.896	151.365	2572.38	466.431	2411.91	1769.67	1011.7	115.275	55.4692	252.55	670.559	251.355	6.7622	-18.779
Endo-2	2168	1189	6673.5	0	19464.7	68.5167	4.05	11.8333	3114.07	65.8333	991.775	98.1333	4109.69	778.075	61.0833	183.742	680.608	30.2667	2121.26	646.325	2178.07	1192.03	6221.75	269.617	62.775	89.2583	1083.1	79.4083	5.6158	-15.7644
Endo-2	2194	1203.5	6740	0	17672.5	87.2579	2.08947	0.578947	2113.83	157.658	6964.77	138.942	21285.9	1217.69	117.521	1174.97	817.3	11.1737	1462.29	851.332	3027.28	1649.85	2208.47	839.211	91.0842	1690.23	1894.41	4497.74	0.1297	-16.9485
Endo-2	2232	1213	8520.5	0	15978.6	127.98	26.4422	24.1395	6255.11	257.956	6255.49	155.19	7977.98	1661.69	240.422	360	5733.56	61.6871	6468.43	1404.53	3371.36	1317.37	1076.88	1026.08	179.84	177.456	13716.7	372.459	1.19572	-14.4259
Endo-2	2252	1212.5	9575	0	2692.97	72.1439	92.1061	199.894	3523.5	223.394	11816.7	205.364	20448	1579.82	109.47	881.712	868.97	262.598	2586.07	864.379	1816.31	1498.46	1272.6	1022.17	129	115.53	1147.36	626.356	-2.24331	-16.2385
Endo-2	2261	1219.5	6799.5	0	10705.5	131.591	0	0	7750.51	329.409	2106.85	174.146	11949.7	1213.32	193.924	22.8947	9160.27	0	6572.51	1177.8	3367.21	1372.6	1270.88	526.532	101	280.076	42816.3	236.298	-3.07249	4.96365
Endo-2	2290	1223	10188.5	0	54151.6	129.577	155.971	290.433	2120.1	116.788	4816.53	154.846	38960.8	1320.94	97.0769	2124.87	367.317	600.212	2386.87	501.173	5280.24	2098.03	911.423	476.51	84	1500.93	430.894	856.827	9.98801	-18.4824
Endo-2	2296	1228.5	11228	0	52283.7	74.2526	103.721	321.374	3027.14	250.221	5916.78	32.5105	9121.7	221.995	24.0263	318.174	9399.74	182.342	1576.26	343.874	1158.76	863.637	664.595	470.747	138.858	62.0526	9832.88	80.1	7.31266	-18.7056
Endo-2	2306	1236	7440	0	18776.2	11.6368	89.0547	63.1791	3362.1	143.776	3393.4	83.9502	12662.1	1224.78	90.7363	713.895	726.627	146.891	2435.01	651.05	2228.35	1065.29	2964.61	608.149	111.955	99.9304	965.9	519.194	2.20005	-12.6709
Endo-2	2316	1232.5	10353.5	0	12254.1	117.863	118	313.735	5072.1	295.902	8313.9	253.618	19441.9	1496	122.951	1179.66	1190.61	265.176	2987.17	929.971	2684.36	1808.93	2392.34	1139.54	129.186	99.2451	2332.45	942.118	-0.234403	-15.6799
Endo-2	2326	1243.5	10854.5	0	28984.2	90.3565	141.912	118.366	5646.04	269.495	4026.35	257.306	6398.77	1969.24	179.162	718.824	599.032	200.204	3326.48	1291.13	2411.34	2486.14	3992.07	834.949	178.162	537.944	557.019	390.236	6.13391	-15.6476
Endo-2	2348	1249.5	6686	0	18117.7	47.8818	13.5369	25.8522	4736.87	280.581	4265.87	241.921	14916	1579.1	168.325	710.837	1057.71	45.3645	2402.8	922.857	1676.27	1010.18	2551.33	1316.42	193.808	173.374	3168.77	159.498	1.8077	-12.826
Endo-2	2354	1253	8816	0	22681.2	105.36	138.81	79.6984	4234.66	140.397	1457.29	117.455	7556.31	1265.41	100.106	418.116	658.466	62.0476	2708.34	663.63	2306.85	801.778	2972.96	540.296	71.328	582.312	535.307	134.794	5.9922	-13.3891
Endo-2	2357	1245	11395	0	27287.6	144.603	0	4.76923	1383.41	119.115	3458.67	37	7970.28	397.718	29.8333	1.19231	226.244	2.75641	1526.58	426	841.923	795.077	767	390.538	122.064	87.9487	624.256	215.346	8.28583	-8.27577
Endo-2	2360	1249.5	10607	0	20787.8	100.832	131.36	318.696	4902.73	262.344	4996.18	327.472	9947.61	1915.82	170.016	534.864	1791.4	215.976	2936.34	638.768	2016.71	1355.42	2497.38	1356.82	227.344	257.52	3686.14	98.376	3.35446	-14.2697
Endo-2	2374	1254	11384.5	0	22931.2	153.212	63.1781	21.8082	2087.26	25.3288	5477.31	52.4041	6563.29	646.897	40.2808	124.212	428.096	22.2466	2964.1	678.863	2027.98	867.137	1555.96	15.2671	27.6164	61.6301	819.897	231.678	3.13057	-15.4043
Endo-2	2388	1263	7272	0	32046.7	53.0058	23.538	19.0117	2293.58	203.713	3270.34	160.041	11132.9	1117.8	52.6901	599.386	668.83	65.7544	2728.6	943.123	1665.84	1284.77	6945.82	1243.12	111.591	4303.3	1156.75	188.035	5.9204	-16.2516
Endo-2	2397	1258.5	5955.5	0	24217.9	59.6522	19.971	35.7826	2274.54	25.1014	2618.26	75.7101	5009.04	817.145	60.3188	334.536	371.71	58.8696	1098.57	163.188	1381.55	220.667	1463.42	199.391	40.4928	369.435	382.449	306.812	8.17782	-9.12526
Endo-2	2407	1269	10143.5	0	40670.8	94.3043	125.071	322.495	4975.75	240.609	1093.59	304.717	13640.7	1722.08	179.484	972.908	1227.88	289.239	3053.38	291.005	3190.73	1168.86	875.076	1001.04	183.332	1177.32	1770.17	104.114	9.93253	-15.5038
Endo-2	2409	1272.5	6772.5	0	9256.76	51.8899	35.9736	49.3921	4640	208.498	9839.53	154.559	18507.6	1531.18	107.216	2455.46	1105.98	90.163	3405.81	994.238	1797.74	1440.89	367.524	1038.38	170.934	199.665	13009.6	191.573	-1.87299	-15.8535
Endo-2	2433	1270.5	11096.5	0	40414.2	173.74	0	38.1771	1071.11	70.9167	3003.62	89.0104	6801.85	786.458	63.9167	0.895833	337.219	2.84375	2370.25	624.125	1771.22	944.823	530.573	168.021	33.9062	716.271	1287.59	120.448	10.9115	-13.743
Endo-2	2437	1279	9364.5	0	36588	80.2407	208.384	514.106	4431.67	162.176	3601.13	195.426	6136.82	1432.2	95.7222	609.699	752.537	284.037	4000.75	1531.91	4517.27	2049.2	1992.48	553.37	83.2685	881.458	560.074	661.917	9.04456	-16.8372
Endo-2	2441	1279	11359.5	0	34124	171.877	145.585	132.69	1663.42	147.398	6163.3	71.5731	9396.3	945.889	45.2281	327.637	826.836	192.947	2359.25	502.082	2202.49	1174.01	1095.95	359.181	48.117	126.895	581.047	131.339	3.69945	-16.0212
Endo-2	2452	1279	9388.5	0	22519.1	86.8649	49.8018	61.4775	1390.5	166.225	2069.37	173.784	8212.47	1387.39	73.6847	581.018	650.658	92.4595	1760.32	499.604	1999.87	593.216	2739.21	853.721	95.7568	982.676	232.45	235	5.85462	-13.1038
Endo-2	2477	1283	7326.5	0	9618.04	96.4	35.24	163.547	6128.31	123.507	540.573	68.3867	10757.4	1471.48	53.92	501.667	1161.85	17.3333	3075.12	713.053	2905.41	667.987	2072.12	292.987	51.6133	86.3333	1285.63	266.413	-2.39727	-8.42757
Endo-2	2479	1290	10138.5	0	34789	105.178	153.583	327.744	5412.69	265.767	5750.14	376.128	21133.5	2327.99	190.522	1346.84	2585.21	323.378	4559.09	682.789	3271.64	1399.07	2386.37	1222.84	267.944	503.161	3249.71	189.5	7.75814	-16.9729
Endo-2	2484	1290.5	11342	0	43369.6	141.982	78.1091	62.2788	1179.25	62.497	3498.03	47.9091	9900.27	513.921	42.4788	193.903	149.721	95.8182	1754.27	387.539	1896.13	919.673	752.703	202.467	43.6242	299.152	325.467	68.7515	10.9846	-13.8356
Endo-2	2514	1304	8913.5	0	38722.5	115.362	83.5652	2215.03	2944.87	406.826	3357.94	101.239	15770.6	1460.48	116.254	975.051	804.775	74.2174	2320.13	1189.36	1647.46	1567.57	1858.17	265.225	164.565	231.978	1054.41	110.833	8.75967	-13.8998
Endo-2	2576	1327	7646.5	0	22907	56.1212	85.7424	15.1212	2514.56	78.5833	4148.8	71.2045	18589.4	1270.32	69.8864	1310.88	657.045	73.7727	2117.06	767.939	1738.85	1467.65	1617.92	335.144	82.5227	1346.82	772.136	104.909	2.9673	-14.6171
Endo-2	2582	1328	7635.5	0	22575.3	69.2119	172	8.44915	1925.39	147.347	7656.46	81.161	27935.5	1602.35	74.7542	2089.25	854.551	166.339	2499.96	890.669	1732.82	2058.24	1958.23	482.381	116.831	1807.76	1059.47	173.542	1.41543	-15.7362
Endo-2	2586	1333.5	9477.5	0	26384.1	101.819	11.4	343.386	5196.47	236.629	572.505	377.79	7843.16	1831.2	187.79	137.095	1013.8	23.6429	2962.77	590.671	1857.07	519	1415.26	1069.05	158.586	110.819	988.262	131.614	7.57556	-12.4411
Endo-2	2596	1335.5	6046.5	0	18009.4	54.9556	59.5259	22.6296	863.615	45.8815	8443.56	75.2222	17444	953.082	68.563	1286.47	677.467	298.156	1252.7	405.83	1056.29	2105.12	2711.39	309.422	69.8222	126.504	557.696	102.037	-0.209534	-15.7603
Endo-2	2601	1348.5	11516	0	22243.7	188.83	243.129	519.096	2597.63	161.472	1918.48	126.753	6856.66	1419.32	75.4465	358.384	660.48	329.959	2644.87	922.251	2793.1	1403.73	1862.1	526.203	109.686	198.561	583.391	357.221	6.08799	-12.58
Endo-2	2605	1336	10791	0	19468.7	133.974	36.2696	13.3826	2772.1	111.609	2702.62	204.722	8204.66	1882.04	454.365	94.9565	41196.8	12.9478	8180.21	826.339	2699.31	1204.36	151.904	556.165	262.913	201.635	51821.4	144.278	12.5573	-7.84402
Endo-2	2612	1345	7726	0	35854.6	128.826	74.4585	20.0553	2492.32	155.356	981.53	212.984	8103.92	2151.02	143.419	535.071	1571.03	120.213	3211.82	1034.84	2431.03	1254.26	2024.61	996.324	145.692	166.818	1029.84	142.739	8.82005	-15.2046
Endo-2	2618	1347	9984.5	0	31824.3	80.9676	56.9676	18.373	2699.05	122.276	5053.45	195.119	8534.83	1376.94	159.811	570.859	1573.28	104.427	2574.08	1107.23	1788.03	1254.48	1493.89	727.27	109.086	180.914	426.654	339.395	3.49813	-15.7155
Endo-2	2623	1355.5	11561.5	0	6870.98	222.53	69.3428	23.6961	4015.96	168.014	9272.32	126.06	6263.08	902.587	86.2862	243.071	609.65	155.767	3950.27	907.668	2626.53	1368.96	1277.98	464.233	112.025	165.424	796.042	514.887	-2.25799	-15.2505
Endo-2	2628	1345	10820	0	24962.8	79.5472	154.491	242.289	2968.55	130.019	3784.94	145.189	5065.19	1294.71	85.3962	294.038	2192.29	100.994	1700.98	466.371	2435.82	1026.36	1626.55	555.887	91.3774	99.3522	5890.04	82.2893	3.44155	-14.608
Endo-2	2641	1351.5	6619.5	0	22636.3	54.6331	50.8273	142.547	1751.71	153.288	310.691	154.245	10781	1043.4	190.482	633.13	385.626	184.734	2279.77	978.093	2221.3	1715.27	3273.42	1135.6	112.288	85.9568	415.662	130.842	6.12979	-13.7496
Endo-2	2654	1357	7508	0	51270.3	136.237	88.3671	14.6039	1513.44	238.053	5942.22	182.063	12713.4	2594.68	157.135	1297.76	1179	352.908	7218.78	2580.08	3594.74	3944.41	2885.16	1131.52	161.855	2490.25	801.957	604.048	8.87363	-19.1469
Endo-2	2660	1352.5	6608	0	35753.6	39.3714	44.4571	94.1524	2290.35	109.6	862.133	125.819	15478	845.219	73.4667	1545.23	445.2	182.81	2698.46	1496.56	3017.85	2708.56	5696.91	1107.71	103.81	79.6	192.933	100.914	6.44812	-16.0494
Endo-2	2666	1361.5	8882	0	23572.6	134.356	2.60638	0.111702	3723.47	139.027	245.351	156.346	19973.1	1048.92	175.984	373.92	1098.76	0.659574	4973.1	400.628	2403.19	1185.28	3.39894	546.495	120.069	117.59	21373.4	177.941	10.4587	-10.113
Endo-2	2682	1365	9981.5	0	21607.7	69.7439	35.1707	2.32317	3538.66	211.39	3934.89	178.274	11626.6	1391.46	136.427	347.5	549.579	23.3171	3037.08	1517.91	2204.63	1169.4	1028.09	565.634	71.7866	381.915	1429	414.567	2.97901	-14.3904
Endo-2	2690	1370	7830.5	0	16741.6	117.618	45.0098	6.29902	4641.93	202.324	752.941	230.5	7089.18	1849.36	156.559	383.093	1311.67	22.6618	3024.7	955.559	2116.32	1231.36	717.206	941.735	180.172	263.613	4115.48	113.451	4.90258	-11.1349
Endo-2	2695	1367	10768	0	22638.3	115.901	346.725	59.7135	1517.88	93.2456	2356.99	151.006	7939.15	1460	100.632	486.222	2035.51	256.421	1421.94	390.409	1310.69	957.041	361.836	346.281	97.1345	114.667	1957.8	67.0409	7.09696	-10.9834
Endo-2	2744	1383	10505.5	0	28015.2	32.5747	40.7931	39.6782	4027.59	270.356	7450.39	91.5977	19127.9	742.161	77.9023	627.121	507.644	28.7241	1888.22	890.902	1436.84	1861.66	557.471	804.615	120.328	345.891	3683.9	1976.62	3.20215	-16.0479
Endo-2	2750	1394	7611.5	0	16581.1	95.6331	202.488	117.468	4315.53	196.282	9062.18	212.903	15021.9	2253.07	76.379	1466.99	1713.04	267.44	4589.36	1992.63	2657.84	2078.56	4540.53	1981.32	192.633	682.867	772.871	599.758	0.265135	-16.1051
Endo-2	2760	1388.5	11004.5	0	52519.3	129.529	350.882	35.2941	1204.83	154.562	2779.18	231.124	7784.8	1835.16	88.6471	484.706	1589.09	259.503	1637.41	726.281	2502.69	1104.41	1304.25	1105.84	98.0654	609.353	697.706	102.961	9.9736	-17.3378
Endo-2	2818	1407	10537	0	22633.1	118.134	76.6756	13.7328	2584.46	118.641	6738.75	150.347	17558.4	1485.9	106.573	446.874	1298.21	16.916	2488.86	742.828	2150.77	1537.89	534.283	556.034	102.263	227.393	6635.28	2499.14	1.45973	-15.902
Endo-2	2853	1416.5	8249.5	0	14775.6	44.9936	33.4423	11.9744	3694.53	151.564	509.103	125.224	4046.64	763.013	121.647	91.6346	9722.83	11.7949	3379.55	570.212	1600.72	488.558	1297.41	515.795	82.3974	60.5192	16325.5	81.1731	7.27761	-7.20273
Endo-2	2855	1410.5	10521.5	0	36628.1	39.1398	43.6989	181.688	2585.73	189.527	7133.37	96.0968	14669.6	1006.34	43.3226	358.323	368.602	157.785	1751.26	683.215	1390.51	1737.83	1400.56	1031.34	136.538	328.355	1597.2	2639.98	6.40329	-18.3359
Endo-2	2869	1419.5	10345.5	0	26244.9	83.4966	231.966	275.054	3534.14	164.177	2759.49	257.605	10405.7	1453.35	80.6599	389.299	901.422	287.646	3116.95	899.109	2242.77	706.973	1676.8	1528.85	259.231	141.007	707.701	122.789	6.73436	-12.847
Endo-2	2871	1417.5	7709	0	26328.4	55.0667	111.342	127.417	1548.71	130.608	1252.94	181.967	16115.8	1562.6	85.5083	1438.31	1267.92	161.95	2031.42	600.575	1933.3	1669.88	777.817	953.758	107.342	385.258	1350.69	140.5	8.34534	-11.9083
Endo-2	2874	1418.5	11277.5	0	48282.8	114.163	73.0074	76.7111	774.748	71.3481	6196.24	47.8815	6896.36	306.193	33.7037	327.874	266.178	242.356	3189.48	698.489	1919.76	1039.99	2341.19	133.378	29.6667	72.0593	217.37	4539.58	6.38295	-19.0552
Endo-2	2878	1425	8442	0	13803.2	120.149	25.3423	44.7568	4030.75	220.279	2524.05	173.955	12485.3	1089.83	225.464	87.5811	6400.43	0	6784.54	1356.22	3181.88	1591.91	477.486	652.464	138.275	260.167	32888.4	1214.3	-3.20917	4.87161
Endo-2	2919	1439.5	10821	0	12947.5	134.937	130.343	428.803	5533.1	166.327	570.024	287.24	3722.9	1811.1	119.783	313.598	1272.46	132.386	3094.58	535.842	2189.87	940.717	1668.89	1696.71	232.441	239.811	452.953	153.496	-0.24593	-8.74133
Endo-2	2920	1433.5	10840.5	0	41675.6	102.13	10.0894	30.1382	4065.32	266.984	1345.21	207.106	9785.9	1854.88	139.455	107.699	1324.99	6.5122	2864.67	491.098	2426.6	1791.08	1059.53	1064.42	142.52	243.805	1379.69	172.341	10.0282	-15.449
Endo-2	2923	1444	7185.5	0	19890.7	108.157	6.49425	0.321839	3272.29	202.084	1059.57	201.245	10720.1	1838.6	144.793	705.655	766.586	31.023	2715.34	834.402	2645.1	1720.47	1671.8	674.487	169.092	191.368	417	137.322	5.24417	-12.5715
Endo-2	2931	1436	11553.5	0	20820.7	112.672	25.7578	1.00781	1337.71	117.688	2253.17	108.117	6949.67	205.203	28.0078	126.398	118.164	136.938	1378.73	299.984	1150.81	1777.39	511.93	290.773	114.227	122.75	495.188	494.406	7.95313	-7.88332
Endo-2	2933	1440.5	7444	0	33607	85.2034	132.678	181.763	2872.68	89.5141	936.475	107.955	7094.36	1316.73	63.678	608.627	334.22	94.9153	2049.9	1022.49	1939.45	847.186	3386.06	601.362	62.5989	3737.5	479.678	80.6667	7.5596	-14.6918
Endo-2	2967	1450	10414	0	20171.2	134.825	293.088	182.497	1446.87	54.4737	1199.57	191.778	8208.23	1685.39	113.251	606.439	1346.41	330.398	2451.06	537.491	1891.96	813.702	2424.5	1003.55	88.655	75.7193	1203.16	79.3684	5.39708	-12.8484
Endo-2	2973	1451	9556.5	0	22179.4	20.9506	129.753	736.099	3533.69	338.481	211.63	163.16	737.049	1420.26	201.074	220.63	721.506	164.235	1727.74	307.136	3343.8	137.136	992.704	547.296	71.0617	102.21	559.136	21.1235	6.89042	-11.9224
Endo-2	3011	1470	10564	0	23034.1	136.115	39.8599	96.4013	1308.15	102.465	2460.27	183.796	11746.3	1781.25	106.771	251.197	1392.56	61.5478	2723.39	555.656	1947.71	1408.9	976.535	779.573	105.758	290.331	1216.66	178.822	4.1759	-13.3765
Endo-2	3039	1475	10592.5	0	27658.7	94.3037	155.015	358.533	2848.73	233.393	892.467	239.081	4769.19	1642.68	139.711	213.904	1417.11	120.541	2337.89	1029.79	1459.71	942.519	3304.81	1534.54	218.652	275.985	1094.93	113.911	6.64348	-13.7831
Endo-2	3041	1482.5	11303	0	15022.7	139.314	18.6667	8.98039	894.069	72.1226	3570.93	93.9706	5232.33	1302.83	60.7647	183.093	972.387	144.368	3368.12	554.657	2706.1	1508.75	628.103	236.324	89.9902	341.23	430.284	294.676	0.293943	-12.1181
Endo-2	3042	1479	7951.5	0	30844.7	77.1037	79.7333	101.341	4008.16	130.067	589.007	144.963	3769.69	1924.89	143.652	464.837	789.526	85.5926	6336.06	2056.52	4116.06	685.393	2324.36	658.956	88.9704	620.489	1464.09	124.311	8.35096	-15.0629
Endo-2	3044	1480	10639	0	29518.9	107.31	166.174	468.293	4215.67	178.342	5928.25	257.63	4530.82	1562.32	89.6848	386.511	1163.03	179.478	2838.14	744.516	3424.73	1112.84	2065.01	2204.33	287.864	406.978	497.516	125.935	3.31348	-15.642
Endo-2	3053	1479.5	10657.5	0	26444.6	68.6216	14.9369	117.91	3600.75	96.2162	9828.9	64.3243	2333.21	1766.32	134.477	153.685	1705.92	22.3874	3516.08	915.234	2839.7	1358.09	1129.42	519.009	92.1441	317.369	7170.47	99.8469	1.65989	-16.6581
Endo-2	3056	1486	6350	0	27710.8	49.1436	35.1128	44.5333	2870.62	125.303	476.836	130.733	3967.93	1386.34	68.1641	355.231	913.451	40.7128	2337.91	1009.09	1980.12	1027.58	3019.48	841.21	147.01	465.954	553.328	79.0872	6.91719	-13.8334
Endo-2	3058	1478.5	8550	0	27695.8	112.797	78.7536	2.43478	3347.12	215.913	2037.04	293.464	10432.9	1361.97	99.8696	346.681	1252.84	67.8841	3813.19	1288.58	4000.17	1090.33	1194.64	1177.1	224.638	257.594	2674.45	156.043	8.7418	-14.3863
Endo-2	3059	1487.5	8996.5	0	28392.9	113.218	4.83886	84.1232	3420.23	353.194	1141.09	196.678	20437.2	997.128	194.398	258.934	45212.8	0.00473934	10073.7	1967	3601.68	3182.03	66.6303	586.668	184.91	636.991	49173.2	313.318	12.5379	-8.2027
Endo-2	3061	1482.5	7187	0	27069.2	108.897	3.29907	0	2035.9	184.075	505.43	171.551	16936.8	1085.32	107.963	391.262	5593.72	2.74766	4921.56	1122.79	2505.82	2021.05	726.72	673.86	123.607	239.523	12897.4	137.047	10.0087	-10.8226
Endo-2	3063	1484.5	10675	0	45726.6	171.704	249.414	456.623	5302.67	205.889	4121.98	369.741	3790.88	1795.67	208.302	305.975	1782.64	143.654	4158.02	732.006	2375.12	721.809	1292.73	2198.14	269.074	259.173	17043.6	129.062	9.60302	-16.9072
Endo-2	3099	1498	7182	0	30262.1	92.7786	5.87786	0.137405	2895.58	107.168	1201.37	158.977	18169.2	1153.89	132.786	633.122	2702.64	5.48092	4140.67	987.664	2054.31	1369.92	258.26	452.55	142.893	136.511	8889.93	259.061	9.84017	-11.3714
Endo-2	3150	1517	8821	0	17255.8	113.65	46.7379	1.98058	2995.42	172.078	2105.71	170.699	9043.46	1378.25	172.806	569.048	1649.22	40	2757.26	683.777	1944.84	1645.72	734.359	809.456	151.078	138.942	3425.82	200.99	4.92508	-10.8153
Endo-2	3166	1522.5	10274	0	36661.2	106.826	492.409	368.727	2571.34	68.0227	5649.63	142.955	13764.3	1739.57	62.2424	1508.03	1203.49	465.091	2891.98	458.326	3121.7	1104.47	706.788	801.78	77.4318	357.591	1131.49	278.318	8.36932	-17.5627
Endo-2	3181	1533.5	7937.5	0	33763.6	96.6515	11.2677	3.46465	3175.64	190.475	2285.58	169.005	15492.2	1407.11	123.818	721.884	897.667	35.2475	2403.65	1399.55	2092.65	1843.36	1514.37	652.848	159.384	451.788	1005.9	168.677	9.65445	-13.8633
Endo-2	3188	1529	10257	0	25961.1	79.8951	197.559	109.832	1252.66	96.3566	3124.59	178.105	12871.1	2076.79	163.455	793.545	1623.99	192.259	2136.31	430.993	2016.03	1348.1	313.245	1014.34	102.552	371.385	1173.82	114.706	4.09772	-13.465
Endo-2	3203	1537	11029.5	0	35324.5	102.565	32.2775	9.87958	1085.3	109.319	7592.9	121.764	8692.57	1448.91	74.6492	389.576	205.717	86.0419	2046.15	671.063	1542.03	3787.83	940.995	394.293	68.9005	2900.12	260.749	448.215	6.91319	-18.1923
Endo-2	3208	1535	11243	0	52139.1	222.606	471.008	519.606	3242.72	158.485	6135.46	254.864	6547.83	1497.24	147.265	1012.12	1252.51	633.939	5269.86	1256.73	3875.14	1416.23	2531.24	799.439	155.348	503.462	586.924	213.212	8.19031	-19.5005
Endo-2	3224	1542.5	11146	0	27771.5	113.346	31.4753	240.648	738.037	76.0617	854.124	52.6049	9120.22	466.167	25.4506	211.636	111.222	102.679	1288.94	482.975	1472.09	611.506	642.691	92.0864	30.9568	312.444	298.173	170.031	8.78479	-9.38152
Endo-2	3238	1543.5	7983	0	17476.1	72.5778	25.9	1.47778	566.244	83.1445	5408.54	112.611	13540.1	1271.36	104.533	1020.13	362.167	114	2490.63	2296.83	1624.33	1589.9	2916.06	309.589	97.2	169.311	421.3	118.856	1.5593	-13.2487
Endo-2	3244	1556.5	10262.5	0	28387.9	88.4779	98.7169	262.173	4963.47	171.504	2293.04	233.18	6079.05	1661.71	106.522	315.165	993.574	122.96	2583.16	842.831	2247.3	720.585	3635.19	1463.33	185.801	175.669	661.404	112.757	6.40565	-14.8189
Endo-2	3264	1553.5	6162	0	25065.3	76.3744	20.2731	111.392	2510.49	187.811	1864.69	218.564	6217.87	1085.04	54.3921	502.286	446.908	90.2203	2355.02	454.062	2303.01	752.498	1542.96	1111.06	193.088	1072.27	1266.04	75.8811	7.72614	-11.3809
Endo-2	3284	1560.5	5296.5	0	14567.2	46.2863	98.2291	46.2996	3701.44	78.6388	3305.15	94.5022	4315.33	1383.75	56.3084	400.132	550.507	92.6344	2250.01	357.678	3329.09	737.352	2492.14	489.432	79.7092	143.96	475.198	126.476	2.71986	-12.5303
Endo-2	3300	1565.5	7927.5	0	37073.1	109.37	16.9219	3.26562	2987.39	199.729	5993.01	164.823	24110.3	2292.11	173.229	1372.48	617.609	121.49	3715.22	1548.43	4255.78	2021.9	1458.92	747.464	128.214	371.047	574.115	292.125	8.57179	-17.8353
Endo-2	3301	1560.5	8550	0	17083.8	94.1954	58.1724	9.1954	3704.28	93.6897	953.345	149.943	7984.76	1247.75	169.77	327.931	1249.61	100.713	3186	978.161	3189.08	797.046	1316.99	666.437	147.379	411.77	869.966	181.368	6.25422	-11.8712
Endo-2	3352	1581.5	7952	0	22845.6	89.4262	200.683	54.4481	3200.36	112.596	1131.01	171.175	2299.72	1597.89	104.716	301.699	1717.72	61.694	3146.74	1097.6	3533.2	246.169	5661.84	691.885	87.5137	327.585	1384.96	96.0383	5.8744	-15.6358
Endo-2	3379	1587	8867	0	18627.5	162.275	305.899	141.138	6715.27	252.91	9035.1	203.201	11880.7	1683.08	155.45	1239.06	1053.31	329.556	5010.48	1998.84	5185.96	2310.52	2267.67	985.937	149.831	3956.58	281.063	215.778	2.67612	-16.6764
Endo-2	3388	1583	7939.5	0	20550.2	89.0606	115.545	50.6818	1307.65	240.47	8135.03	142.136	8779.73	1558.33	93.8333	740.288	1931.02	85.2727	3548.15	1301.18	1508.65	465.515	3549.08	1262.08	91.7121	310.864	1376.95	61.3333	0.173293	-15.8589
Endo-2	3413	1587.5	7352.5	0	20924.8	93.5606	6.68182	0.439394	5934.53	185.773	1298.23	134.03	11357.3	1165	41.6667	335.697	491.227	29.8182	1660.26	741.258	2273.24	1002.17	1458.36	682.242	81.4091	132.97	546.288	82.6212	6.64767	-11.0732
Endo-2	3419	1598.5	10482	0	24512.3	96.5301	180.628	201.224	2965.77	143.508	9016.77	112.492	12505.2	1726.85	86.7923	871.628	941.153	161.863	3072.15	328.279	2859.09	1547.7	985.29	707.186	104.339	115.011	678.721	1924.02	1.54074	-16.5712
Endo-2	3442	1599	10206.5	0	24341.6	129.028	297.887	246.689	3220.09	105.019	8356.3	105.302	12731.7	2343.66	106.132	950.349	1128.06	400.255	4575.08	1127.57	3487.16	2405.51	1273.9	902.953	110.821	201.698	780.019	515.557	2.12565	-16.1818
Endo-2	3462	1605	7854.5	0	25144.8	92.2901	0.777778	0	2320.44	194.864	1529.88	93.5802	14937.7	1074.28	132.414	69.821	14049.6	0	6798.98	2484.46	3816.02	2221.28	517.056	384.679	182.673	243.623	37118.1	36.2284	11.9862	-9.23221
Endo-2	3463	1607	10875.5	0	29638.6	185.31	559.421	14.9127	990.214	90.3651	5046.14	169.706	7564.32	1772.71	96.8571	772.206	1302.57	472.841	2454.99	1045.66	1402.1	1501.99	1328.34	537.619	104.437	592.071	853.786	163.69	3.82814	-14.695
Endo-2	3470	1608.5	6839	0	26051.5	96.5541	0.0509554	0	8854.08	201.834	262.904	78.9427	5632.48	1905.36	219.166	36.4777	2481.39	0	9988.92	1367.64	5392.69	1765.59	155.35	561.299	99.3567	261.427	30532.9	94.5478	11.9203	-9.67473
Endo-2	3473	1612.5	8809	0	27734.3	118.376	55.7772	7.29208	3055.83	200.936	1440.26	267.891	11513.2	1282.54	141.079	725.183	1850.46	75.6881	2595.51	1022.23	2156.97	1124.01	818.807	1061.58	146.97	164.941	5007.29	121.515	9.01133	-12.0703
Endo-2	3475	1606	10198	0	22408.3	110.86	544.07	345.23	4054.77	155.36	7159.58	103.3	19853.8	2746.56	138.72	1458.68	1901.89	683.8	4056.73	575.34	3033.12	2109.06	869.41	682.1	65.39	242.01	1064.52	677.44	2.1377	-15.0053
Endo-2	3485	1612	9568.5	0	31339.1	51.2	325.896	1009.38	2081.66	183.192	713.824	158.312	3525.46	1748.1	119.24	551.04	764.8	403.64	1831.6	856.704	1025.74	267.464	1493.91	785.824	97.92	1458.83	680.192	136.472	8.31227	-13.0481
Endo-2	3492	1617	7037	0	20937.9	69.6474	8.36538	8.20513	2161.1	105.622	2788.71	51.782	21311.3	832.635	53.3782	578.167	3888.38	25.7179	1391.88	979.244	1964.42	2519.94	977.981	616.904	141.462	116.686	7854.4	119.295	7.72728	-9.50039
Endo-2	3493	1617	7141.5	0	13637.8	52.1053	12.6184	0.164474	1632.98	182.974	4462.06	170.395	10551.3	1343.19	150.796	541.671	1812.95	21.375	2467.88	754.191	1653.72	1663.98	2710.85	1029.47	136.276	251.862	2603.72	270.013	1.50035	-12.738
Endo-2	3499	1619.5	7874.5	0	35362.2	139.577	1.65672	0.920398	3454.63	199.806	2103.95	167.423	19724.8	1732.21	201.07	767.1	13845.9	0	6138.1	1743.17	3349.66	2130.35	391.129	989.04	441.677	441.279	35252	94.597	12.0705	-9.5049
Endo-2	3501	1620.5	7829	0	21685.5	267.651	5.17204	0	3076.51	303.817	9899.19	291.425	23876	2272.75	258.855	781.339	19961.5	0	8212.3	2068.55	2715.32	3139.81	2436.03	1479.33	609.936	299.452	43415.5	7173.11	1.00501	-18.9142
Endo-2	3516	1622.5	7093.5	0	28967.8	67.1164	51.0582	77.1534	2297.38	105.434	271.788	147.709	5820.49	1714.43	112.545	430.206	1630.04	105.471	2286.9	661.138	1610.82	795.021	1852.88	1221.09	134.921	337.032	1005.48	89.2116	7.99637	-12.468
Endo-2	3518	1622	7961	0	23306.5	92.3333	30.2424	3.18788	6008.12	228.042	310.661	249.139	9037.47	2018.03	178.642	718.558	1689.27	45.7455	3617.82	1754.42	3240.82	1563.98	3935.87	1158.77	127.236	394.261	1502.94	168.018	5.98332	-14.8322
Endo-2	3526	1624	6834.5	0	23752.7	63.0217	2.4058	0	5301.88	113.906	104.326	75.8406	6348.49	1706.97	181.616	2.57971	1606.38	0	6634.43	1028.59	3930.41	1810.53	62.6667	420.688	97.6522	178.565	32978.9	102.667	11.8105	-9.62669
Endo-2	3527	1620	6846.5	0	21664.2	61.1818	4.54545	0.151515	3949.49	110.586	398.556	48.3131	8732.43	1494.67	160.475	107.101	1447.39	0.161616	5424.43	993.99	3724.84	1958.68	458.242	456.222	99.1313	136.03	23702.9	119.232	11.703	-9.6399
Endo-2	3566	1638	7156	0	43526.9	186.008	26.725	9.65	4458.96	303.283	2555.42	345.625	14831.4	2461.71	238.333	1102.8	1950.33	105.575	4429.64	1156.13	2759.27	2285.84	1741.9	1405.68	201.183	773.175	1091.62	226.75	9.42164	-18.2028
Endo-2	3573	1642	5281.5	0	39231.3	106.116	36.6899	839.845	3211.32	132.124	1034.93	151.767	16008.6	1325.36	89.7364	1070.33	426.395	414.116	3777.77	448.077	3694.26	353.38	4766.02	519.806	69.1938	3356.11	384.907	171.318	6.80178	-15.9234
Endo-2	3574	1643	5381.5	0	18015.9	42.3113	198.152	64.9868	3333.41	85.7616	1527.35	116.132	4919.91	1470.57	67.5298	501.457	477.146	71.3841	843.781	310.391	2664.91	694.907	2411.48	297.715	72.1325	282.596	355.556	29.6887	4.90485	-12.5253
Endo-2	3575	1638.5	7374.5	0	17093.1	100.083	100.188	36.1562	3733.19	185.781	1673.92	306.302	9745.25	2082.98	149.156	1132.91	8794.99	153.073	4408.68	725.167	2159.12	1297.07	1545.62	1862.58	160.156	178.469	7080.55	80.6146	4.36958	-12.7558
Endo-2	3607	1646.5	9204	0	55431.6	92.9216	57.8333	5.08824	2218.01	165.078	6875.67	143.48	19073.2	1306.26	87.451	1135.36	412.735	51.7451	2112.89	1067.28	2992.03	1785.14	631.078	407.706	50.7255	357.363	361.696	125.431	7.52856	-19.8138
Endo-2	3615	1648.5	9211	0	41276.8	106.732	47.6829	0.0243902	1980.51	87.4634	3839.46	151.415	14485.1	1486.52	87.0854	841.232	516.256	44.3902	2876.98	893.476	2249.59	1211.46	749.207	624.341	75.0976	142.073	303.976	110.073	9.84989	-16.0338
Endo-2	3621	1659	7176	0	19395.5	123.923	117.074	30.9331	4554.95	238.371	2180.57	232.157	10455.6	1894.61	206.512	687.157	1512.4	94.8696	4275.5	888.692	2151.81	1635.32	2384.48	1391.1	156.381	354.9	871.14	116.097	4.87866	-13.0885
Endo-2	3638	1665.5	11264.5	0	61382.9	198.266	258.585	1411.48	2060.13	216.72	2859.75	100.783	5877.65	801.778	45.4348	471.145	522.971	193.469	5384.37	3718.41	4029.45	1432.2	2010.72	255.681	108.995	3937.94	806.048	125.947	10.5072	-17.8599
Endo-2	3662	1673.5	9595	0	4022.42	135.315	48.1925	48.107	6809.82	386.203	8567.89	260.455	7371.8	2163.55	210.947	101.69	10854.3	0	11697.7	728.417	4002.84	823.984	8.40107	956.759	98.3048	206.925	40381.6	285.615	-1.08622	6.20877
Endo-2	3679	1675.5	11283	0	47953.3	177.158	272.322	1635.47	1124.65	169.386	2499.64	98.2515	4702.4	1106.94	50.7135	450.211	740.251	246.901	4606.21	6133.98	3267.87	1647.22	2470.49	168.865	81.7427	10259	810.982	151.006	11.4449	-17.5113
Endo-2	3690	1679.5	10799.5	0	14750.1	117.902	293.424	790.083	3535.55	247.583	1292.11	217.045	5654.14	1645.61	127.902	368.091	990.682	196.144	2328.05	1018.2	2862.33	617.5	2046.95	1482.35	159.985	1315.4	738.083	92.7348	4.60189	-12.9878
Endo-2	3739	1696.5	6364	0	10152.2	70.468	80.0705	71.8846	3003.54	139.923	2046.29	180.833	4398.79	1414.77	62.9038	624.385	926.436	76.2885	3113.81	713.167	2237.84	699.885	2144.75	936.75	91.3461	219.647	1383.83	115.122	1.25963	-10.6115
Endo-2	3753	1702.5	7308	0	42229.2	91.3778	116.689	110.094	2188.98	210.378	1513.78	212.867	31350.6	1628.53	95.0389	3268.89	599.583	213	2073.22	933.994	4971.08	1550.02	1169.07	1171.26	152.667	265.328	357.383	99.4611	9.67928	-16.6628
Endo-2	3769	1709.5	8452	0	14450.9	122.307	195.76	1204.2	2895.18	283.646	1452.57	247	16539.9	1467.51	216.151	935.474	1346.25	168.474	3138.49	2854.91	1923.86	1467.15	635.266	902.135	173.844	308.635	983.49	444.474	3.63036	-9.79258
Endo-2	3775	1707	5734.5	0	9496.3	76.2439	21.5041	68.1707	1342.22	130.285	898.423	137.602	13001.6	1328.76	77.5366	986.537	594.642	62.8537	1743.24	591.504	3262.63	482.398	2794.51	779.463	74.5366	430.789	833.488	134.894	-8.58549	-13.8731
Endo-2	3777	1707	5398	0	26379.2	54.408	4.47761	14.9204	3310.32	91.7164	4609.44	118.736	6800.88	1596.29	81.6517	326.861	448.249	64.4876	2967.41	826.806	3225.03	994	4477.49	466.244	101.448	124.443	511.95	170.159	5.81734	-15.2454
Endo-2	3788	1708.5	9505.5	0	44596.5	77.8476	213.171	812.295	1998.9	159.686	7640.54	107.714	8254.23	1360.75	79.4095	997.648	599.914	387.705	1965.76	5273.72	2191.53	2296.25	2768.66	538.648	109.381	5900.96	407.505	53.9619	7.57663	-19.4189
Endo-2	3806	1713.5	9525	0	26777.4	121.289	11.8772	311.912	4741.57	312.86	4987.26	200.64	8736.58	1593.72	148.114	440.833	619.921	63.5526	2623.05	1224.02	2151.65	1760.73	1229.61	661.789	57.0175	1151.07	671.447	59.5702	3.08057	-15.0652
Endo-2	3819	1720	10482	0	24561.5	132.185	10.716	478.691	1578.98	472.321	8844.56	123.728	7020.43	1143.12	52.2593	79.6543	495.704	11.8889	3011.27	3155.11	2948.83	1182.26	420.395	139.728	19.5185	2640.69	666.247	5099.04	1.28647	-17.2415
Endo-2	3841	1731.5	7242	0	24837.8	95.4884	110.428	50.2	3391.66	202.284	3988.76	253.967	8069.41	2256.33	167.172	1020.54	1435	151.023	3115.41	744.754	2056.14	1584.16	1098.59	1589.03	214.07	824.242	838.363	179.46	3.7951	-13.7692
Endo-2	3856	1732	8006	0	11922.9	67.598	106.853	51.2941	2820.4	120.549	8166.73	60.4706	13047.7	1605	104.98	747.99	684.167	58.7157	2023	783.588	2480.04	1267.82	2486.96	393.176	55.8333	258.686	757.627	168.882	-0.389565	-15.599
Endo-2	3869	1745	11035.5	0	18232.1	131.709	35.0516	68.3145	1611.27	149.756	3837.85	168.272	10398.7	1505.23	122.967	226.648	2097.28	59.0141	1663.08	526.47	1850.04	1962.18	890.822	560.221	125.606	936.756	5185.76	188.131	1.64918	-13.5743
Endo-2	3893	1749	8807.5	0	28500.7	96.4138	50.1897	27.9828	4002.82	243.259	2345.48	420.161	16993.7	1547.61	173.787	983.098	1507.47	109.351	2373.96	944.575	1850.87	1302.6	1505.52	1920.35	270.644	215.161	1098.64	194.529	7.62657	-12.8413
Endo-2	3941	1766	7255.5	0	23725.8	79.5423	65.3284	34.6269	4329.62	151.751	3187.24	120.97	10920.4	1841.75	123.662	1034.2	1354.34	130.826	4124.92	589.652	2319.54	1331.1	731.527	729.945	123.005	329.254	513.532	129.383	3.8745	-13.6897
Endo-2	3953	1773	7434.5	0	15848.7	91.4455	72.0297	146.698	2711.53	224.277	7840.08	199.262	12117.9	1983.32	204.594	730.213	1801.58	63.0545	2978.54	711.673	2061.66	1412.39	2341.71	1212.51	151.005	163.688	6774.43	800.327	0.130702	-15.5939
Endo-2	3956	1770	8976.5	0	16556	73.0543	16.8915	2250	1160.18	627.085	667.008	102.465	7433.03	890.062	114.566	257.55	4105.88	21.0388	1186.31	2800.76	827.868	1244.95	550.597	584.512	76.3488	227.767	2251.61	110.023	3.65612	-9.29518
Endo-2	3969	1775	5405.5	0	9395.62	61.8372	43.9225	4.46512	3757.27	182.527	899.581	187.016	10531	1608.57	155.473	297.55	1233.25	55.1318	3350.66	892.636	3080.81	581.139	2562.95	1214.75	158.047	141.38	743.884	8.65116	-8.43158	-13.8117
Endo-2	4010	1789.5	7723	0	20438.9	120.482	101.286	53.3631	3241.28	111.44	1179.64	207.964	6602.55	2297.52	164.923	654.566	1951.89	59.75	2428.73	1615.42	2959.35	1059.73	2506.79	921.744	114.929	359.56	567.089	116.845	5.17289	-13.2801
Endo-2	4027	1795	8966.5	0	33773.4	70.2	67.6	12.4207	3392.5	134.166	627.71	122.207	7705.22	1093.42	117.51	553.903	495.235	130.828	1894.27	514.759	1841.22	1120.32	715.186	761.324	102.041	137.041	642.2	111.697	9.917	-12.6706
Endo-2	4047	1798	7542	0	22028.5	63.0952	114.913	174.349	2259.29	132.127	110.944	145.611	10501	1674.57	86.2381	444.397	1089.1	161.786	1768.91	1269.25	2610.88	840.254	1630.15	862.746	98.5556	175.706	438.889	77.0873	6.06319	-12.3617
Endo-2	4054	1800.5	8583	0	43174.2	131.779	302.239	3074.21	2685.39	510.192	6051.73	162.69	11823.8	1643.83	198.028	1199.73	1354.94	357.061	4835.28	3868.06	3266.65	2336.21	3153.91	790.357	130.803	3051.21	935.202	2194.55	9.6504	-19.6028
Endo-2	4060	1805	6422.5	0	30396.7	73.9677	141.349	151.398	3105.65	120.118	2481.84	163.962	7069.13	1234.22	87.6129	782.898	808.855	178.022	3361.15	1291.39	2972.43	1608.44	2149.46	647.043	162.129	629.462	1082.3	324.043	7.90705	-14.0889
Endo-2	4072	1807.5	10583.5	0	22316.9	147.476	200.583	300.762	3720.42	186.268	1223.86	163.512	4264.98	1815.51	107.72	353.06	1129.99	168.518	2680.75	927.821	2510.14	677.482	2762.62	1217.37	101.78	345.107	793.78	154.214	5.45982	-13.3656
Endo-2	4090	1816.5	6967	0	47777.7	101.484	35.4314	42.5621	2253.38	165.83	1024.89	107.922	5533.86	1343.86	61.6928	355.49	257.458	44.3007	3444.37	2460.77	4578.71	1903.41	2381.66	906.739	180.392	2219.22	262.431	77.7124	10.1525	-17.3491
Endo-2	4092	1817	9286.5	0	39166.4	104.494	127.931	206.5	4033.22	188.644	2795.8	343.086	11965.3	2375.42	253.483	517.264	617.063	250.184	3659.71	852.73	1460.44	672.552	4342.24	1022.71	151.121	276.029	801.259	474.621	7.37906	-15.9862
Endo-2	4102	1821.5	8595	0	21737.8	101.31	233.705	909.9	4189.56	269.42	1396.98	194.21	5834.8	1177.15	95.05	399.135	1429.74	232.875	2189.82	837.25	2292.61	847.975	1613.47	1125.49	121.02	859.955	686.45	262.63	6.04565	-11.7384
Endo-2	4121	1824	5694.5	0	23926	86.503	205.988	127.655	3704.9	182.564	6717.84	255.442	8782.78	2016.04	86.2788	1050.43	982.764	231.703	4119.32	1300.46	2519.84	2153.87	4549.91	2086.02	205.588	751.036	303.212	653.103	4.55912	-16.0965
Endo-2	4144	1828.5	7272	0	21926.6	83.9605	43.5658	6.69737	1366.11	157.987	1252.61	169.974	28936.6	1175.21	68.1842	1833.78	578.5	122.579	1400.57	610.066	2126.64	2253.46	728.289	944.197	113.579	256.408	149.171	118.316	7.5613	-10.6426
Endo-2	4149	1829.5	8949.5	0	39843.1	124.757	77.9286	32.0571	1894.69	134.229	1704.57	135.557	13574.6	1479.79	101.614	1040.5	687.071	81.2857	3220.71	1275.56	2354.7	1508.83	1219.5	584.5	80.5429	249.543	1376.49	156.657	9.93476	-15.5026
Endo-2	4156	1832.5	10951	0	27502.3	114.725	263.099	247.703	1425.19	236.549	5160.31	223.868	5388.08	1776.3	144.736	515.099	1386.79	354.451	3653.69	2020.82	2094.36	1798.96	3677.05	762.473	117.011	2814.78	1121.9	811.78	4.85185	-15.772
Endo-2	4167	1838.5	6948	0	36636.2	47.5119	68.8929	178.798	459.071	50.2143	1350.2	200.44	1386.07	1365.9	23.2262	434.155	421.107	63.8333	1839.79	1251.24	1523.25	1766.19	2262.02	1160.45	123.012	2249.24	146.893	80.0952	9.25066	-14.3799
Endo-2	4172	1847.5	8544.5	0	40146.3	116.233	221.287	527.329	2815.64	222.421	3978.45	171.554	8947.34	1166.13	110.404	683.425	1043.01	220.433	5570.69	3190.03	2195.85	1693.77	2280.18	716.062	109.946	1321.74	752.775	1669.97	8.04056	-17.9082
Endo-2	4203	1855.5	8523.5	0	50836	144.296	366.082	3736.67	3305.72	373.478	6820.04	217.164	9683.77	1391.45	158.245	1034.92	1104.14	382.138	6942.14	5380.83	3586.1	1786.99	2314.46	808.478	107.597	5507.45	899.472	1766.29	9.70063	-19.7018
Endo-2	4246	1868	6251	0	17097.9	54.9429	5.04762	19.6095	1405.99	68.4381	1791.52	76.019	6019.23	700.533	68.8762	302.752	5203.78	10.8095	2385.1	453.771	1373.91	725.238	1230.05	295.743	70.581	84.819	11263.2	113.419	7.07958	-7.35529
Endo-2	4253	1870.5	6854.5	0	16641.5	65.7329	28.1429	1.2236	2759.1	174.832	3597.5	123.882	6457.19	1029.18	66.4534	482.776	838.292	117.547	2799.57	1182.08	1953.24	1261.58	3299.88	958.832	166.59	1328.69	886.627	81.5776	2.00217	-12.5858
Endo-2	4270	1880	9388	0	15882.9	82.2513	136.359	1309.27	2347.99	118.267	7997.29	150.954	12191.6	1537.45	113.949	491.764	687.195	112.256	3183.84	4302.58	1786.39	1729.61	2181.54	681.841	77.8256	3885.79	846.503	4134.91	0.63889	-16.8444
Endo-2	4281	1889	5713.5	0	23948.5	75.4703	133.6	57.2973	1726.06	151.362	2134.33	150.357	14705.5	1945.98	103.076	1321.21	1747.57	139.508	1438.94	547.222	2274.39	1396.58	1398.09	1157.58	124.973	422.649	2374.57	141.211	4.48721	-13.2983
Endo-2	4282	1889	6876.5	0	40507.3	33.7006	31.4132	36.7066	3306.66	105.844	1122.16	114.766	4743.93	1393.56	61.6048	605.287	852.18	224.024	2888.08	932.072	2882.59	1490.18	857.024	994.713	95.2455	5094.24	1033	110.958	10.8238	-15.5652
Endo-2	4288	1884.5	10432.5	0	40301.2	127.652	251.804	262.37	2664.75	79.7826	5376.74	158.685	34506.4	1854.84	95.2609	1135.46	1017.29	469.772	2324.25	705.848	3026.02	1750.05	518.739	671.848	106.511	168.207	1008.86	1067.93	8.48636	-17.6875
Endo-2	4289	1888.5	6344	0	49580.7	92.7424	121.621	82.0758	1697.89	143.606	6088.3	134.992	8573.73	1320.28	75.1136	1166.51	978.886	281.803	2734.85	733.455	2205.52	1470.12	771.985	858.182	143.379	654.795	921.886	1759.37	7.54312	-19.1212
Endo-2	4303	1898.5	8470	0	34302.7	173.161	231.292	152.518	3319.5	250.595	6372.98	214.56	21948.5	1774.56	168.685	1555.64	1352.15	288.577	4226.71	1537.8	3906.67	2980.65	972.756	957.476	116.042	442.339	918.309	2164.21	8.14533	-17.9112
Endo-2	4309	1893.5	10432.5	0	38028.3	175.163	201.872	216.023	4720.73	163.442	6772	196.686	43388.1	2003.76	165.512	1211.93	1171.05	359.349	2546.76	832.558	2889.5	1951.42	463	827.767	130.965	195.198	1005.15	365.221	8.22327	-17.7857
Endo-2	4311	1892.5	9900	0	45303.8	98.7879	0.469697	14.8788	769.545	69.4091	9949.58	90.5303	19617.5	772.318	105.409	1032.02	446.061	15.6818	1360.97	675.485	1803.86	2846.76	480.652	498.803	118.955	742.106	458.848	304.379	6.91889	-19.3305
Endo-2	4320	1904	10400	0	30850.7	137.72	146.108	67.8602	826.054	126.28	5509.59	115.296	10938.2	1531.27	106.887	563.452	1009.03	181.79	2779.74	1013.77	2780.38	1753.18	387.446	406.586	98.5108	117.812	300.038	1256.48	3.06612	-15.6312
Endo-2	4340	1912.5	7278	0	21960	102.42	95.4713	179.276	4790.18	258.431	1577.63	270.207	10979.7	2969.18	197.529	1442.64	2501	216.368	3300.62	1284.34	2089.6	1053.7	6107.49	1997.02	237.115	273.253	882.017	71.2989	5.36799	-15.8974
Endo-2	4378	1927.5	10517	0	32905.8	163.239	362.239	781.534	1572.53	219.074	4587.24	290.761	37027.9	2251.69	149.454	1221.35	1326.31	512.031	3054.09	2108.75	2761.18	1987.8	668.749	707.098	105.35	339.491	225.632	573.601	7.86901	-16.5691
Endo-2	4391	1934	6020.5	0	27125	64.6667	11.975	5.46667	2276.07	137.15	190.417	124.05	5374.53	1566.06	97.95	543.442	1120.34	41.65	2242.24	714.017	2548.34	952.342	567.467	371.358	131.35	137.892	1528.05	112.833	8.89722	-12.0275
Endo-2	4403	1935	11084.5	0	31406.3	85.6636	321.243	36.9813	1837.39	100.86	3284.63	155.701	3858.36	1555.84	99.0093	571.794	25654.2	269.271	6173.87	1942.86	2538.93	1162.53	2944.01	603.365	87	212.888	33510.7	531.374	12.3435	-9.165
Endo-2	4409	1937.5	11123	0	15668	154.286	212.024	321.579	847.056	58.6191	5589.34	126.651	3085.61	1683.23	83.4603	375.063	8206.23	284.698	2777.93	610.524	2283.4	1404.61	1247.08	663.421	101.976	222.389	9458.8	793.111	0.541184	-14.0236
Endo-2	4412	1938.5	10393.5	0	45620.3	646.981	383.148	3194.95	3852.76	471.935	5547.15	340.611	39864.5	3096.45	268.176	1400.85	2583.73	275.407	6569.27	8279.74	5015.82	2609.06	1115.53	1240.1	126.528	3170.51	13266.9	1520.77	9.7181	-19.7822
Endo-2	4418	1940	11109	0	30604.5	209.343	407.438	346.552	3411.31	281.095	4362.2	235.724	4349.33	1215.04	48.181	134.2	30986.5	113.667	5665.88	1298.37	2567.04	1145.83	2431.09	1190.51	216.152	127.867	33983.2	390.2	12.3636	-9.1014
Endo-2	4429	1952	9203	0	19020.5	99.7541	132.109	261.825	3704.35	153.415	1955.36	264.699	5373.35	1939.49	182.683	292.055	938.727	174.645	2775.68	798.443	2185.48	449.322	2994.56	1250.08	94.5519	346.328	664.546	3162.29	4.94748	-13.5344
Endo-2	4535	1993	7001.5	0	11941.5	99.6074	64.8444	6.86667	2819.29	154.822	9746.45	135.496	15119.1	915.17	72.0815	734.437	6078.3	9.48148	4441.63	894.696	2011.16	2173.81	1109.33	775.43	225.215	556.222	15884.1	173.089	-1.12138	-15.9276
Endo-2	4539	1993	7237.5	0	20817.6	107.553	63.75	14.9848	1863.94	128.091	656.28	82.0606	7070.15	2079.89	153.235	641.47	1787.05	56.3712	2416.04	376.227	1828.1	1184.23	315.553	349.773	62.0833	206.038	1457.57	56.5152	4.51897	-12.4151
Endo-2	4583	2009	10247	0	15201.4	146.517	9.67816	0	5047.08	186.276	4753.78	184.414	15194.9	1806.99	103.374	150.431	2321.58	6.01149	3960.8	946.983	3448.67	1320.7	409.644	559.345	104.086	862.259	7101.05	172.971	1.41	-14.2319
Endo-2	4606	2019.5	7854.5	0	16995.1	111.655	58.8545	9.24242	4548.69	147.345	7404.05	242.164	10281.3	1767.35	113.776	650.333	1082.87	133.836	4295.45	2022.58	2826.24	1905.09	3216.27	1012.28	125.036	203.764	1067.61	219.576	0.830278	-15.5696
Endo-2	4619	2026	6288.5	0	36975.5	97.4397	27.0517	129.181	1671.59	166.534	2246.5	153.129	11170.3	1267.84	60.9052	1149.93	760.638	264.319	4189.12	1060.32	2977.24	1529.83	594.293	1286.22	130.879	1515.72	664.328	65.2759	10.0409	-15.2222
Endo-2	4635	2040	5840.5	0	7396.8	51.9909	9.37805	1.12195	3778.29	113.189	2310.56	101.104	9267.17	1383.7	150.098	455.689	3857.11	6.28049	5232.37	1195.21	2362.01	1936.65	1593.66	956.826	120.497	232.366	26175.5	161.726	-3.97545	3.4533
Endo-2	4639	2035	7875	0	41914.1	110.601	106.887	47.7934	2439.88	162.3	5370.04	166.742	20349.9	1580.61	103.662	1823.64	665.474	175.042	2666.72	2833.04	2723.32	2102.76	1793.54	864.178	108.624	367.352	624.174	331.845	8.16762	-18.07
Endo-2	4642	2032.5	5196.5	0	23783	56.5	38.0641	12.0641	2387.18	105.474	93.109	144.321	8306.88	1745.03	94.391	442.699	1090.51	40.1987	2071.53	504.891	2586.62	1010.89	1438.63	944.487	133.891	889.558	671.667	125.571	6.18337	-12.4371
Endo-2	4653	2043.5	7805	0	29503.5	86.738	46.7594	5.13904	2435.94	102.984	2255.64	159.636	10174.5	1761.28	154.053	681.877	537.251	59.9412	2242.07	932.423	2112.04	1108.41	1633.14	916.342	116.711	150.62	2440.95	144.465	7.67842	-13.2559
Endo-2	4685	2055.5	6978	0	34467.8	63.901	80.9583	1592.12	7419.16	551.344	5605.24	127.182	10590.8	1489.08	107.208	1053.98	575.724	144.656	4078.35	8461.58	3425.99	1873.83	1590.78	980.068	197.719	966.479	2436.78	206.979	10.1361	-19.0659
Endo-2	4695	2055	8590.5	0	20028.4	109.981	131.963	19.4352	3329.25	186.417	1681.37	150.88	12241.5	1183.14	149.343	634.361	856.583	139.778	2195.97	1197.56	2523.09	2001.29	1070.02	769.167	110.454	409.204	587.917	1132.66	6.16749	-11.1454
Endo-2	4705	2058.5	8621.5	0	43118.6	196.194	223.559	141.634	4899.49	388.312	4389.07	434.925	24044.4	2391.02	214.172	1590.25	2331.8	251.387	4542.62	1663.8	3394.66	3602.3	1860.1	2566.31	358.968	675.634	1668.54	2312.92	9.09095	-18.9433
Endo-2	4716	2064.5	6255.5	0	51945.2	80.0667	36.6444	118.015	4087.6	110.378	3933.21	124.022	12371.5	1054.24	41.2815	1254.72	310.763	174.807	1877.65	899.63	4170.77	1373.16	811.822	1054.39	151.622	1306.7	135.03	32.3185	10.2651	-17.5744
Endo-2	4738	2077.5	8615.5	0	22294.6	151.785	154.39	85.8728	1974.97	204.105	2173.32	233.987	15280.1	1539.22	174.785	992.732	1445.77	202.794	2269.7	1064.04	2682.38	2154.78	725.895	853.917	160.263	406.513	944.083	1090.96	4.19551	-13.465
Endo-2	4743	2081	6982	0	42382.4	106.161	87.7929	1343.07	2513.46	445.711	4052.94	163.807	16251.2	1700.01	100.307	1645.04	938.65	194.436	4027.1	1933.62	3817.67	2313.17	2626.73	923.454	134.721	991.446	2178.03	300.886	9.02836	-17.9754
Endo-2	4748	2074.5	6252	0	50705.1	65.3712	74.7197	106.576	3945.97	137.811	2338.65	151.621	18198.3	1542.9	69.9773	1720.06	313.091	225.121	3383.76	897.992	3287.83	1311.08	963.091	1086.64	99.1136	2942.22	145.871	53.4773	10.4204	-16.9478
Endo-2	4749	2079.5	7140	0	24226.6	113.753	51.159	5.48954	3893.29	301.967	8156.2	277.728	30860	1881.28	320.519	2998.96	2275.01	46.0209	5434.01	2388.6	3370.37	2224.46	2815.23	1463.03	189.565	215.008	11723.9	253.192	1.82807	-16.2984
Endo-2	4762	2080	10665	0	11840.8	158.413	44.7536	53.5942	7252.19	96.3406	9996.28	215.746	15300.6	2772.56	445.572	192.819	1235.36	14.6232	4152.08	1132.33	2512.59	1413.18	1109.78	440.884	68.0217	232.565	10510.4	1117.71	0.0222353	-16.0123
Endo-2	4772	2084.5	9878	0	13712.4	107.659	117.968	1962.98	1324.87	198.365	1619.17	168.841	10596.2	1590.79	153.278	397.651	1712.62	187.738	1790.25	840.413	1097.89	1069.1	913.262	666.603	73.7619	328.659	973.738	162.452	3.38313	-9.19997
Endo-2	4784	2090	7252.5	0	14940.1	97.5026	52.7077	7.28205	1510.63	110.236	5019.5	161.103	14396.7	1323.08	120.708	458.605	11038.5	65.2872	3187.3	431.472	1837.29	1420.12	438.108	699.595	104.697	124.226	18295.2	142.241	-0.168741	-12.6984
Endo-2	4788	2093.5	4810.5	0	31159	75.1377	12.6159	10.4058	1528.45	85.4058	3705.3	81.8913	17931.2	952.761	50.1884	756.174	231.935	205.71	2610.74	1294.43	2571.25	1678.05	7137.43	322.935	75.4493	1874.6	562.225	77.5507	5.80425	-16.3602
Endo-2	4790	2098.5	6179.5	0	15818	73.711	56.7706	110.908	2350.59	135.619	10723.2	118.326	6754.25	1325.7	69.5413	886.266	875.569	123.541	3448.06	898.028	1976.28	1050.08	2616.93	680.66	129.656	210.959	1019.27	180.894	-0.511196	-16.3005
Endo-2	4830	2114	4877	0	48160.4	53.7125	6.45417	1.69167	1544.09	111.683	309.092	163.838	17153.5	903.592	88.9625	465.542	653.067	41.8583	3484	1462.01	2468.62	2268.2	3292.78	425.321	128.783	696.821	886.267	61.0458	8.92228	-16.2148
Endo-2	4841	2119	10769.5	0	12600.8	128.891	42.754	27.8145	3419.37	169.153	6071.77	179.008	11652.3	1911.41	338.516	306.609	3175.42	24.5403	4290.17	1937.34	2425.96	1268.94	2173.24	991.258	154.093	408.738	14620.5	321.355	0.742771	-14.4578
Endo-2	4842	2116	8092	0	54305.3	162.56	215.171	60.76	4627.55	128.669	3612.05	223.589	3952.52	2139.53	209.486	676.011	1731.05	178.217	7843.71	711.743	5885.61	3525.59	973.543	1325.76	190.114	38.4457	772.291	2890.34	9.57532	-19.1753
Endo-2	4857	2118.5	8967.5	0	45258.3	152.054	277.586	166.631	2560.22	283.631	1274.88	239.171	32114.7	1970.12	158.288	3561.5	1884.64	607.036	4318.4	4732.49	2188.7	2168.01	3665.61	1295.95	245.73	228.342	584.36	59.3063	8.84913	-17.4184
Endo-2	4858	2119.5	10415.5	0	33228.2	133.523	447.333	321.182	2825.53	221.727	1327.35	307.992	11522.1	2065.76	149.576	1057.47	332.606	354.439	2442.02	969.97	3960.58	1153.54	1023.12	1439.41	190.492	956.924	240.553	87.9015	8.63687	-15.2939
Endo-2	4869	2126	8671.5	0	46551	147.872	109.527	64.5764	969.291	140.764	695.966	97.0394	21073.2	1340.18	130.429	1203.14	925.094	196.281	2207.86	921.902	3119.72	1845.8	1008.81	488.266	88.5271	483.222	866.591	1449.71	10.4031	-16.3942
Endo-2	4886	2127.5	8962.5	0	44665.6	99.9429	231.876	97.8381	1604.5	148.324	801.076	83.981	16544.6	1096.01	126.552	1176.55	986.39	319.533	2826.36	3499.93	1826.81	1339.49	2862.24	447.895	87.9238	74.5143	507.905	27.6762	9.6788	-16.075
Endo-2	4889	2129	10754	0	37430.2	158.859	35.5259	14.4667	4027.61	199.785	7245.35	259.489	16166.1	1875.34	252.393	378.133	781.711	30.963	2711.27	1496.41	2533.79	1836.3	2118.14	1356.11	173.059	1218.88	9873.13	202.859	7.39376	-18.4337
Endo-2	4906	2140.5	9326.5	0	53514.7	154.742	432.149	1891.91	3047.19	739.747	3358.87	273.696	31015.8	2267.69	239.412	1654.49	1193.29	669.247	9835.75	7389.58	3361.63	2183.97	5111.78	1514.02	201.418	50.6031	805.381	2222.53	9.58591	-19.4426
Endo-2	4908	2139.5	8882	0	24233.7	189.011	278.995	1648.63	3598.48	335.191	2556.74	385.377	6602.23	2000.51	247.077	747.219	2238.42	326.208	3289.44	962.579	1922.82	822.596	2553.59	1985.75	355.29	6584.07	602.415	3095.84	3.58985	-17.0583
Endo-2	4950	2157	9089.5	0	17089.2	98.7374	101.495	104.01	4073.81	168.379	1947.1	180.343	19646.8	1515.68	143.444	980.187	785.874	153.49	2700.01	705.444	2066.48	1558.9	766.177	955.869	75.4495	93.3788	673.505	2910	0.638995	-13.3756
Endo-2	4988	2167	10033.5	0	33338.4	118.337	81.3804	1474.1	1937.4	296.043	523.239	274.016	5413.9	2172.99	206.103	389.473	1012.01	179.364	2378.68	495.614	1498.51	571.603	1546.1	1244.01	160.06	348.5	1020.72	103.163	8.23458	-13.1367
Endo-2	5007	2174	4993	0	43442.7	83.0385	0.108974	1.55128	1000.65	146.494	707.962	172.667	19666.6	885.147	68.6667	689.269	591.583	23.3974	2885.78	3193.38	1858.64	3234.44	5896.22	748.314	107.115	10853.7	1339.5	113.981	6.90292	-16.2845
Endo-2	5028	2176	8763.5	0	13426	94.7308	30.7179	22.3846	1529.26	257.833	4717.77	195.064	12519.2	1495.83	86.7564	568.026	1146.78	72.3205	2013.83	937.513	1945.71	1277.72	1148.79	1019.94	154.167	147.718	801.615	3088.41	0.117852	-14.1595
Endo-2	5035	2189	5243	0	22157.4	85.2301	127.793	105.709	1528.67	155.916	811.751	109.638	19047.2	926.948	64.446	1576.59	189.638	47.061	1434.59	699.798	1620.62	1930.78	2748.84	944.211	134.122	856.033	105.728	95.8075	6.3665	-13.0504
Endo-2	5051	2196.5	9231	0	10866.6	78.3133	368.735	93.5703	4335.96	158.639	5278.27	180.731	10013.3	1696.81	148.534	655.454	789.771	166.703	3463.25	1407.34	2930.37	1465.99	1304.38	584.855	77.1325	177.831	676.233	1338.91	0.554699	-14.1736
Endo-2	5068	2201.5	4997	0	29655.8	68.1465	0	0	2481	139.914	2046.93	103.076	21182.1	858.98	96.9545	793.49	335.884	22.9949	2754.19	1064.36	2688.49	2733.73	2016.56	576.136	164.455	5353.06	1154.84	118.288	11.095	-14.3331
Endo-2	5111	2215.5	7268	0	33094.6	91.7564	121.782	50.9487	2933.38	160.712	1212.9	215.096	14145.4	1612.33	106.615	1079.71	1956.02	135.288	1799.28	586.583	1924.56	2667.69	885.429	1194.38	115.692	720.929	1380.46	120.263	9.79431	-13.3622
Endo-2	5130	2224.5	8926	0	29789.8	142.16	6.65278	21.0556	2870.03	274.618	2417.21	219.931	28115.8	1009.29	160.722	555.368	777.924	18.7014	3372.38	3228.28	2233.42	1511.71	1226.24	908.139	156.993	789.729	599.333	897.076	8.92578	-12.1345
Endo-2	5141	2229	7258.5	0	50329.5	80.0476	71.3469	54.8639	2317.05	81.0544	987.721	132.993	12022	1583.6	132.116	853.524	789.993	92.5986	3139.71	842.558	2450.01	4153.86	483.075	428.653	89.3537	1209.14	3138.59	121.299	10.7107	-16.5807
Endo-2	5152	2235	10700	0	19507.2	132.871	5.27419	43.4785	2370.03	125.559	2862.13	199.93	6537.91	1407	101.484	84.3817	838.575	19.1237	1364.27	654.806	2071.83	1180.53	679.575	955.29	105.081	540.409	387.28	106.398	3.78467	-13.1624
Endo-2	5167	2243	10717	0	36388.3	108.333	77.8615	55.7282	3474.59	195.656	3145.07	170	7653.3	1711.78	142.846	253.415	1382.26	113.733	3224.93	942.61	2735.72	1155.08	584.395	667.144	82.1539	1015.61	11396	115.077	9.81528	-15.2275
Endo-2	5171	2237	8908	0	24615.2	165.133	0	0	1936.34	192.675	3087.32	209.417	26366.4	718.775	120.917	232.1	511.467	5.26667	2886.64	2742.39	2468.62	1661.5	1224.99	625.075	165.217	1093.58	511.483	1120.43	8.77083	-11.903
Endo-2	5193	2250.5	8011.5	0	55398.3	119.576	149.833	67.7955	362.629	72.6667	1975.48	118.5	24259.9	1478.9	50.5379	2424.61	80.7803	140.682	1793.02	686.409	4248.42	1260.08	960.765	550.492	81.6061	1657.29	45.9621	77.8939	10.3259	-17.4151
Endo-2	5219	2256	6766	0	17606.2	76.4722	0.291667	7.52778	2227.9	139.681	9710.97	55.2361	8522.88	1248.07	43.0972	583.472	694.583	22.3194	3627.62	1786.89	2349.51	2659.1	1779.68	354.25	89.8611	359.153	1021.92	278.806	-0.240155	-16.1415
Endo-2	5226	2263	10447	0	21347.9	115.949	501.865	454.244	1151.19	77.3846	3510.6	150.314	4483.03	1594.4	84.2949	616.692	912.321	394.34	1672.4	733.474	1580.88	521.5	1055.76	444.186	74.9551	123.058	434.878	118.231	3.7482	-13.4
Endo-2	5234	2262	6661	0	51728.2	131.18	14.8652	0.449438	2116.74	174.865	4184.8	100.888	8788.77	1137.19	42	329.854	702.371	10.0225	5151.89	3122.62	1589.39	2007.84	1842.42	592.337	58.3258	82.764	728.382	4337.94	7.67754	-18.7147
Endo-2	5278	2292	5700	0	43723.8	59.7955	32.447	12.5303	1409.14	155.023	73.3561	157.371	26953.5	1292.43	71.8788	1526.58	2910.68	42.0152	5248.45	2878.2	1820.65	3336.48	3187.57	1320.71	228.299	134.25	5884.81	686.155	9.30638	-16.2902
Endo-2	5279	2285	6829.5	0	34820.8	78.5181	40.0414	92.7047	3140.81	193.321	7167.05	112.648	19372.7	1224.51	74.3368	1381.17	565.466	132.42	3816.6	944.539	2355.12	2782.75	5000.04	652.202	97.4197	453.171	412.689	1449.06	6.42073	-17.387
Endo-2	5281	2281	9103	0	38290.7	88.718	85.1368	34.8974	947.829	145.726	7665.42	178.812	15954.9	2094.03	168.376	1085.77	390.581	227.085	3626.69	1345.49	1798.56	2003.64	1375.09	816.239	119.573	161.795	237.573	545.103	6.92344	-18.76
Endo-2	5286	2282	10359	0	48031.4	144.235	110.353	15.5686	1882.15	117.216	4384.63	232.235	21243.5	1879.56	105.01	622.167	1386.61	173.373	4583.38	1833.49	2449.64	476.931	2091.37	711.48	89.1274	134.265	478.314	2962.98	8.8779	-18.257
Endo-2	5303	2285	10295	0	28185.7	154.816	567.412	583.57	2379.14	104.798	5085.43	149.605	11124.5	1926.41	84.0175	971.781	874.5	416.526	3206.06	849.912	2748.74	4889.32	952.728	743	94.0263	198.035	984.368	1318.34	2.88515	-15.4306
Endo-2	5305	2289	8840	0	30330	180.906	5.68125	1546.01	11443.5	493.669	3573.88	169.887	17247.9	1089.27	121.719	389.919	826.481	10.0875	3320.55	12979.8	2573.74	2291.88	1376.14	723.356	174.456	3344.31	723.837	3138.54	1.90172	-17.2036
Endo-2	5307	2288.5	9113	0	14195.5	139.152	138.78	286.356	1381.02	237.227	6825.58	237.068	17854.8	1839.23	171.152	1343.24	683.788	194.25	2754.85	989.038	1880.95	1204.76	1739.46	894.705	180.136	172.235	359.106	1137.65	0.0827693	-14.9625
Endo-2	5309	2287	6314.5	0	42833.9	36.5256	2.5	12.2692	1523.94	106.615	4474.86	41.3718	14824.3	1072.85	67.3461	871.526	482.385	107.436	3208.2	3017.55	2111.65	3093.03	2883.92	328.782	100.833	1524.53	838.308	151.936	7.83224	-17.5701
Endo-2	5311	2291	10364.5	0	41105.8	105.134	301.141	717.049	3203.08	277.993	5047.53	194.493	22856	1646.58	87.5352	903.345	1228.2	361.444	4084.89	1315.65	2602.7	551.437	2038.09	1961.56	215.127	104.352	447.979	2475.62	8.27521	-18.0692
Endo-2	5330	2306	5462.5	0	17001.8	44.5447	127.864	315.603	3980.88	159.934	3394.14	192.066	15114.5	1597.79	89.4358	1036.14	1110.98	146.206	2486.86	569.658	2840.78	1356.03	1222.33	1361.78	152.195	548.879	693.276	204.739	1.9239	-13.9317
Endo-2	5346	2307.5	9653.5	0	34222.8	94.1055	26.8444	71.65	1741.31	175.489	2077.25	161.344	17579	1490.17	154.483	551.178	233.411	156.717	1341.72	524.939	1717.21	1409.95	542.656	457.933	65.5611	473.689	192.478	128.294	9.76691	-13.4208
Endo-2	5405	2329.5	5545	0	14087.4	85.4562	114.687	29.4885	3557.39	150.65	2680.02	214.392	15605.4	1452.01	144.267	941.793	879.677	73.9309	2603.88	622.571	2287.35	1614.53	802.945	1061.93	138.35	148.691	775.051	387.599	0.350358	-10.6233
Endo-2	5454	2340	5930.5	0	16742.2	63.5659	60.8527	21.5581	1585.26	105.581	10507.2	78.0853	18826.9	1379.83	71.4729	2279.16	982.132	143.465	2070.85	769.202	1114.83	1557.05	1941.47	849.721	100.38	505.349	901.868	579.248	-0.584145	-16.3224
Endo-2	5474	2351	8297	0	14852.3	61.6558	25.7302	26.1721	4899.46	211.577	1639.78	152.358	8039.24	1099.8	178.977	236.009	9234.4	2.19535	6604.69	2890.84	3272.08	980.298	403.456	863.065	144.293	1215.75	22910.6	143.698	-3.22063	4.8304
Endo-2	5489	2354	8798.5	0	23179.3	137.684	44.4269	1407.63	3227.66	355.135	5397.92	100.175	9039.54	646.673	78.8363	327.977	324.099	49.2749	2912.74	4876.99	2265.19	1654.97	1336.79	230.24	78.076	1570.56	698.936	2172.44	1.30099	-15.511
Endo-2	5503	2360.5	8344.5	0	46812	94.0573	33.901	20.9375	2780.4	211.422	4852.91	249.5	13590.3	1174.31	140.979	875.062	887.193	109.661	2663.24	532.339	2151.26	1400.97	1477.64	1018.87	170.797	647.229	713.667	238.604	7.82144	-18.5101
Endo-2	5509	2361.5	8773.5	0	48516.3	154.466	152.262	2021.42	3168.75	541.801	4196.02	170.699	13412.6	1311.53	100.524	916.184	892.704	180.544	5456.4	8793.39	4061.35	2749.24	1944.45	699.087	139.723	951.199	762.403	1631.08	10.1111	-19.0189
Endo-2	5511	2360	10143.5	0	22481.7	146.515	89.3232	263.343	2023.78	143.45	328.712	170.338	5047.53	2154.68	105.556	219.348	621.404	155.773	2059.07	204.54	2095.82	138.126	357.45	309.838	43.0606	34.0556	318.071	88.7071	4.55631	-12.4471
Endo-2	5513	2363	5555.5	0	26767.2	67.9748	48.3788	69.1263	2853.98	120.889	2210.59	135.515	13790.1	1418.86	91.5252	996.404	849.662	125.919	2928.17	899.121	2123.05	1275.26	2061.6	876.778	143.495	150.05	586.879	203.495	6.90882	-12.9086
Endo-2	5603	2400	7023	0	9549.39	53.3144	2.53788	0.768939	4218.65	246.705	1219.95	199.03	12087.8	1372.43	129.686	17.822	17582.6	0.401515	13786.8	2380.19	2618.05	1341.14	4.17803	1068.53	173.61	173.549	40577.3	315.125	-0.169278	5.45918
Endo-2	5618	2397	8767.5	0	12710.5	114.209	11.1525	2070.51	1878.18	552.085	9000.93	128.249	26794.7	939.04	104.458	1100.01	422.718	36.7853	2042.08	5593.51	2784.08	1601.84	885.678	525.062	108.593	2228.18	411.734	403.141	0.785708	-15.2804
Endo-2	5626	2399.5	7042	0	17214.8	72.3429	2.61905	46.419	2979.49	235.743	9668.28	204	23095.9	1060.45	70.781	617.095	9508.62	0.619048	6156.38	2301.48	2588.94	2784.25	2035.98	972.238	185.124	195.248	23236.1	907.533	-0.678407	-15.9878
Endo-2	5672	2422.5	5718.5	0	36693.8	63.4409	35.0108	55.5323	2244.13	110.468	149.688	88.6989	21924.4	1432.94	64.0538	1406.89	683.694	230.414	4359.95	4971.36	4430.44	1402.84	6357.69	768.984	106.634	99.2527	607.898	70.2473	6.41105	-16.3064
Endo-2	5676	2422	6633.5	0	19780.6	48.1859	4.42308	23.7885	1527.03	123.891	5783.33	90.0192	13693.7	1289.92	76.1218	582.538	610.718	34.1603	2111.26	638.308	1000.55	2070.81	1056.6	1031.58	95.0769	383.519	665.353	174.846	-0.194599	-13.8925
Endo-2	5684	2432.5	4221	0	28387.7	62.787	85.7778	53.0093	1216.99	73.3194	11832.4	86.7361	7769.19	1070.15	49.4815	663.338	688.75	235.593	2947.92	1228.17	3081.15	1186.83	5757.19	317.542	60.7731	406.329	562.056	254.231	5.62678	-17.6296
Endo-2	5706	2439	4170.5	0	33634.7	69.6637	109.762	49.5157	2492.56	94.0493	6952.53	113.489	8700.22	1305.94	58.7175	702.17	757.682	161.655	3365.08	1210.78	1889.85	1547.65	4040.09	471.623	60.4574	403.578	698.856	1143.58	6.5063	-17.2767
Endo-2	5708	2432.5	8680	0	14130.9	68.7712	94.3529	1440.52	3915.59	270.935	827.399	343.281	6452.62	867.863	80.3464	173.601	688.49	60.5948	1676.57	774.869	1437.54	413.412	1384.95	1093.54	186.288	154.307	120.052	73.0261	3.69862	-9.06602
Endo-2	5718	2436.5	5478.5	0	11617.8	79.7266	82.8594	987.344	2647.98	399.258	3897.62	127.281	24730.3	1753.09	92.3281	1756.31	1147.59	116.789	3792.79	1476.26	2319.77	2106.36	5281.98	1305.71	144.859	151.836	816.25	475.867	-8.58263	-17.5822
Endo-2	5731	2445	8515	0	43567.4	126.406	167.078	39.1389	2512.54	273.417	4340.82	296.433	25054	1480.13	194.944	1550.18	1205.09	258.161	2727.72	1291.13	2771.34	2293.44	540.983	1405.96	208.967	841.878	541.922	220.55	9.45711	-17.294
Endo-2	5740	2462.5	6082	0	24765.1	64.1967	102.337	35.1033	4305.92	159.99	2140.53	167.387	10805.1	1422.65	63.04	702.21	480.533	56.0567	3391.14	967.617	2358.88	1244.76	1900.87	887.513	155.7	212.897	863.237	105.84	6.70502	-12.8406
Endo-2	5753	2459	9588	0	17661.2	115.641	198.116	1352.64	5458.12	334.066	1607.66	340.621	15293.5	2706.7	281.237	625.141	1060.3	352.561	2790.52	1090.76	1255.38	603.515	1729.81	1561.77	213.712	3015.41	541.99	126.99	-1.70461	-6.81008
Endo-2	5755	2459.5	4077.5	0	11465	59.5255	43.852	14.3469	4276.91	69.0102	3651.83	110.015	11336.3	1365.59	66.0663	709.454	656.429	87.801	2342.78	505.745	2308.99	691.949	5575.52	426.117	56.1531	240.153	749.939	79.1174	-9.65844	-18.1429
Endo-2	5757	2453	8383.5	0	27864.9	81.4242	45.3636	29.0758	1897.2	135.894	916.636	147.833	3362.36	1074.03	77.2879	311.864	694.242	153.545	1650.08	365.848	1832.91	360.273	601.773	952.061	122.818	114.167	705.439	144.242	8.94153	-11.3653
Endo-2	5758	2459.5	6547	0	28529.4	38.5439	31.4503	17.5205	2359.12	65.5556	686.269	56.3041	10318.2	1034.42	36.2456	428.947	483.737	28.2281	1615.4	831.982	2025.22	400.421	2508.91	262.573	62.3333	455.164	1109.96	41.1287	7.56861	-12.9234
Endo-2	5766	2461	6517	0	24496.8	59.8796	0	1.41667	983.537	127.815	3489	64.6389	23942.7	1097.55	422.028	503.889	2344.38	0	3491.32	844.852	1774.03	1437.07	98.1759	335.769	94.713	293.454	9459.75	159.722	8.377	-10.1532
Endo-2	5784	2475.5	4085	0	22043.5	77.68	52.36	12.0571	3025.3	93.7657	3018.21	112.543	11456.6	1440.71	84.2914	539.851	813.926	73.5429	2892.07	717.286	2265.49	1044.75	4375.87	576.086	70.24	529.223	802.269	100.617	5.77092	-15.0058
Endo-2	5793	2476	6653.5	0	20888.7	89.992	2.048	0	4332.51	128.152	2628.62	96.28	8449.07	1607.06	169.944	179.632	31651	0	9676.48	1524.51	4429.07	1552.55	152.648	629.576	157.536	981.008	47368.1	138.488	12.5537	-7.99107
Endo-2	5800	2485.5	8816.5	0	22527.1	102.922	7.54902	0.00490196	2888.49	149.52	4158.29	121.426	18738.6	618.877	54.3676	399.314	380.897	7.77941	1283.79	897.961	1153.13	839.176	805.338	411.255	93.7353	218.588	200.828	72.0686	8.086	-8.20093
Endo-2	5807	2484.5	7200.5	0	9623.89	98.529	72.1087	37.1449	2465.58	226.58	5642.72	142.065	14052	1258.57	79.3333	949.493	13518.4	6.56522	2835.99	1095.52	1890.75	1219.04	796.681	1422.46	132.957	157.507	22682.4	2303.78	-1.61096	-0.550861
Endo-2	5811	2481	8843.5	0	30142	193.256	3.92308	0	4069.17	322.333	2927.1	198.487	30550.1	1980.14	556.782	808.538	2755.27	2.30769	4736.26	2409.14	2429.03	1229.15	1385.06	1540.67	205.833	698.718	6504.51	154.269	7.59916	-14.9227
Endo-2	5827	2488.5	10682	0	27242.8	120.308	111.641	75.6068	1490.43	232.863	1423.44	203.709	8242.44	1979.04	133.949	365.667	1300.67	134.983	1997.32	474.573	1502.61	1460.5	396.47	720.65	156.308	520.35	992.829	88.0085	4.47891	-13.1831
Endo-2	5829	2490.5	6072.5	0	16669.6	54.6587	222.786	77.1032	8344.21	117.627	2405.06	91.3016	7180.44	1169.94	36.7619	457.333	431.444	61.5556	5229.64	1105	3066.41	800.944	3119.67	373	95.3889	172.603	265.54	54.4444	2.9309	-12.6576
Endo-2	5839	2489	5662.5	0	40428.5	159.53	45.6667	26.0303	2761.11	151.803	208.652	104.091	35526.5	1657.92	62.9394	2043.86	1088.8	332.576	4529.55	1233.41	2154.52	3799.08	5656.79	1163.77	178.318	116.409	831.833	292.803	6.91604	-16.2607
Endo-2	5840	2490	8034	0	31.7436	112.423	5.88462	0.615385	6127.27	247.936	14432.2	112.103	18330	2058.08	443.513	100.462	53229.6	3.33333	14593.1	2729.22	3299.88	1621.18	2273.97	477.115	1205.19	111.09	48408.4	91.2949	0.300796	-2.7562
Endo-2	5844	2497.5	9740.5	0	28790.8	84.9885	96.546	129.19	1891.56	159.057	1131.33	299.425	8886.03	2045.44	165.787	486.086	2322.05	217.707	2010.28	760.126	1139.29	643.207	1208.3	1179.38	95.6667	102.511	3229.88	109.149	7.74364	-12.4907
Endo-2	5850	2493.5	5653	0	40585.8	143.605	45.0247	5.93827	1776.3	92.9753	837.63	169.457	35014.5	1907.09	81.1975	2929.33	1270.39	302.086	8247.6	4200.77	3398.48	3307.22	4351.26	1231.28	114.58	139.704	704.852	140.531	8.61689	-17.2466
Endo-2	5860	2496	8002.5	0	39149.2	113.139	30.1881	4.64356	1596.56	164.426	8969.52	172.663	38389	1659.06	114.812	2735.49	393.505	204.891	3419.82	519.871	2595.88	1934.45	403.406	1422.46	119.485	1492.93	317.04	586.327	6.89712	-19.4505
Endo-2	5866	2506.5	10312	0	56593.8	215.274	394.94	461	1804.18	237.383	4234.09	287.224	15398.9	2361.04	178.343	996.269	1425.92	574.806	4569.55	2533.71	3194.11	1530.26	3620.45	1084.08	124	340.856	281.488	131.129	9.23488	-18.9545
Endo-2	5870	2499	7208	0	28469.8	132.829	173.705	63.781	4132.09	184.419	12488.3	315.762	13134.3	2217.77	209.714	1324.56	5106.63	133	6424.55	3477.59	4414.74	2989.98	4753.66	1761.76	251.476	1288.32	12824.1	2069.09	2.87145	-18.109
Endo-2	5886	2506.5	4172	0	30631.1	61.9141	307.898	64.9297	9116.66	137.242	18791.8	155.93	6548.35	1764.62	48.3516	886.07	962.312	222.953	6645.86	1902.6	5574.38	1702.88	2699.24	482.164	117.266	457.938	745.367	302.148	4.93663	-23.7516
Endo-2	5904	2507	10809.5	0	22393.7	93.8333	466.462	983.513	4330.18	492.308	3588.82	315.821	6493.99	1240.69	93.2692	785.154	1046.59	457.59	1640.59	551.205	1180.14	655.538	2991.41	2254.03	370.744	444.692	922.974	80.782	6.11735	-13.2314
Endo-2	5947	2529.5	5613.5	0	48008.4	96.503	11.6121	61.2788	1858.62	135.988	73.1879	124.521	31843.7	1555.73	61.7515	2062.42	791.249	257.121	3986.73	3309.16	2127.72	4442.72	4393.98	779	133.818	108.812	768.067	73.9212	8.49334	-16.646
Endo-2	5952	2535	10281	0	29526.5	85.4768	150.991	205.787	2803.58	192.981	6591.13	147.269	11858.4	1537.59	108.264	716.005	852.986	218.102	2406.83	948.009	2434.46	1211.43	1233.33	734.162	113.426	185.495	262.458	162.639	2.88501	-15.69
Endo-2	5960	2532.5	10427.5	0	40635.6	121.228	241.663	2760.66	2515.89	342.935	5834.26	158.663	12481.3	2221.99	123.609	590.375	1354.33	240.25	2768.31	3550.85	2131.36	1074.99	1542.53	334.288	65.788	2966.3	816.696	85.6793	9.55291	-19.3199
Endo-2	5969	2537.5	7902.5	0	40686	130.661	221.891	614.19	2854.74	315.201	2205.09	276.425	18922.8	1921.92	161.075	2157.12	920.971	362.006	1370.45	813.828	2410.48	607.845	906.644	1889.99	189.782	803.391	396.483	180.718	9.69617	-15.592
Endo-2	5983	2542.5	5277	0	19034.1	79.8978	1.76889	28.0667	2235.27	167.547	49.4133	150.951	10737.8	1780.55	101.218	273.609	977.164	8.05333	2242.81	1589.36	2330.12	1112.06	2457.88	559.369	85.56	1079.84	587.498	155.271	5.33944	-12.7321
Endo-2	6010	2542.5	8794.5	0	31558.5	64.3737	9.84849	19.4444	2035.49	220.475	58.4747	494.808	19426.2	1096.81	137.848	352.313	1270.49	11.9495	2228.26	815.04	1567.33	1087.87	812.02	1650.55	205.576	265.253	2523.31	106.091	9.72756	-12.2961
Endo-2	6050	2557.5	7907.5	0	20994.9	102.162	304.393	204.342	4224.73	194.675	11336.1	361.821	14783.4	2415.38	182.658	1758.02	1057.2	465.821	3048.46	728.692	2597.97	1838.06	1892.52	1646.74	214.12	200.59	128.419	996.094	0.97477	-16.6019
Endo-2	6078	2565.5	6099	0	13216	64.5449	83.4611	34.6647	3396.96	179.042	2112.87	186.263	13939	1957.42	101.844	1029.08	609.605	132.617	4045.85	1250.91	2501.23	881.425	6311.4	1464.37	178.946	847.335	567.545	91.5629	-9.37525	-18.3914
Endo-2	6079	2571.5	6084	0	17273.3	76.8942	22.5385	57.5	3572.78	223.457	1853.69	142.37	16191.2	1294	55.6683	1300.79	726.812	197.529	4016.7	1370.91	2922.28	1486	5512.75	935.188	152.457	837.072	1253.62	122.096	5.62832	-15.6175
Endo-2	6104	2570	6497	0	40944.6	61.3056	326.292	18.75	2685.58	113.764	64.8472	61.8472	24235.2	1928	97.2639	1422.1	476.556	52.2778	2520.57	940.528	3167.47	1079.68	1163.9	533.653	86.0278	1945.86	339.111	145.278	9.99966	-15.4412
Endo-2	6114	2583	10455	0	37488.2	152.723	164.631	491.472	1406.13	155.246	3202.18	186.2	11131.2	1590.17	63.8462	352.138	1025.23	128.703	3022.3	740.323	1813.56	1347.91	626.41	692.846	85.4974	686.723	454.518	304.123	9.71117	-15.1934
Endo-2	6115	2582	5121	0	7621.39	84.5426	19.5461	2.05674	3768.49	293.972	390.681	203.844	27274.1	1682.55	187.511	1747	1310.71	11.5071	4997.48	1423.63	2644.61	4346.45	2155.39	1579.47	290.649	233.695	9211.83	3282.89	-0.0967076	-3.92843
Endo-2	6143	2585.5	4935	0	19977	67.5317	32.9286	4.2619	2665.88	173.028	7702.86	228.94	25434.8	864.024	52.9206	1811.6	577.631	83.6071	3531	1182.43	2004.22	3042.33	2037.79	940.222	212.921	178.107	1914.46	169.647	0.369871	-15.7473
Endo-2	6183	2604	4000	0	24487.8	95.8086	16.5432	10.6543	2141.65	97.2654	769.457	112.599	14495.9	1275.65	125.272	603.543	772	41.5	2493.05	671.895	2845.65	1663.37	1587.71	1077.22	147.068	385.315	1810.3	109.512	7.36839	-12.3568
Endo-2	6187	2603.5	4925	0	46816.8	66.5714	37.3029	2.57714	2833.98	128.251	4705.72	183.52	24195.5	980.057	92.5543	1679.03	617.189	69.6343	3516.19	2151.89	2390.79	3538.74	3666.71	698.28	189.64	244.829	1903.22	268.594	7.79467	-17.6226
Endo-2	6188	2601	10846	0	35361.4	88.7704	73.8296	15.0667	528.926	80.6222	6527.02	127.578	11724.9	1263.5	75.7407	126.896	533.03	74.2667	2231.33	870.704	1724.04	1280.73	860.756	627.718	65.6963	205.956	139.081	1974.3	6.68275	-18.2795
Endo-2	6190	2604.5	6065.5	0	41395.8	68.9388	8.10204	78.1565	2355.94	128.435	1102.91	118.088	15907.9	966.068	43.0272	1488.39	727.163	79.3809	3128.92	1116.47	4484.88	1637.78	3328.62	843.333	103.605	705.327	905.395	140.048	9.475	-16.5445
Endo-2	6201	2612	8424	0	18789.7	95.0422	106.704	99.1831	5666.7	184.962	1221.46	157.775	11629.1	1383.95	112.329	712.361	1449.2	112.399	3984.61	1261.07	2554.57	1203.21	1451.72	871.239	120.986	552.967	2595.55	173.291	5.69867	-11.5096
Endo-2	6205	2610.5	5610.5	0	22358.5	49.9762	2.59524	0.928571	2892.36	114.887	884.202	116.792	18558.1	1225.73	64.8393	358.887	6215.18	0.52381	2062.4	1232.83	2096.65	1790.67	941.577	935.196	89.7143	831.375	10965.3	129.494	9.31327	-10.6166
Endo-2	6207	2608	10479.5	0	45718.8	112.046	81.25	138.815	1124.23	100.981	2309.92	223.963	15078.5	1585.46	107.454	399.065	1094.23	95.7037	2794.51	759.333	1689.61	1352.42	997.176	647.444	109.444	574.343	229.333	532.528	10.0982	-16.0763
Endo-2	6210	2607.5	5094.5	0	29010.4	63.1771	75.8438	3.40625	2562.28	91.0729	186.969	52.7396	34920.9	731.927	16.625	2743.92	357.208	54.5104	1596.97	848.01	2113.65	2474.9	5836.07	331.365	82.0625	306.573	5986.86	792.99	6.05664	-15.7453
Endo-2	6212	2614.5	4449.5	0	9009.72	69.276	5.32975	1.02867	1447.85	94.172	727.702	80.2617	7093.14	1020.7	104.971	51.595	2058.13	0.27957	4013.3	724.229	2189.05	1151.86	1461.43	401.384	112.928	519.305	29460.1	76.5806	-3.9423	3.57233
Endo-2	6217	2628	5249	0	33841.2	59.8451	14.5718	41.7859	2302.39	116.603	201.882	158.868	9236.34	1354.66	90.7916	321.831	895.448	37.7324	1816.89	410.597	2260.11	1399.01	942.237	1259.91	152.254	274.515	758.065	57.4873	9.89293	-13.0854
Endo-2	6223	2613	5116	0	23567.9	103.171	109.577	132.813	4483.17	341.325	1628.28	314.26	16341.7	1706.35	154.114	1164.82	1286.94	182.455	3919.21	899.122	1891.46	1856.48	1069.49	1946.35	244.252	1479.72	202.268	323.537	4.6706	-13.1607
Endo-2	6233	2621	10856	0	33449.3	142.343	40.3306	8.77686	1141.69	90.0248	8950.13	166.07	12618	2211.11	103.236	188.851	1122.69	94.2273	3741.2	1307.46	2838.33	1885.75	1293.97	744.021	84.4297	321.955	718.083	4303.15	2.83585	-18.3414
Endo-2	6235	2617.5	5808	0	34928.8	97.1304	2.66667	0.0434783	1123.93	86.7609	775.746	112.174	9440.93	1217.34	66.4783	417.681	422.217	8.50725	1057.23	609.688	1745.86	1141.83	1451.15	269.138	70.7971	340.384	1078.46	106.254	9.90371	-12.9556
Endo-2	6239	2628.5	10191	0	18940.9	114.691	131.842	103.506	5127.26	211.552	6379.86	233.317	12139.5	2014.44	87.9228	522.251	1297.41	222.073	3772.78	864.498	3002.7	1003.1	1056.5	1904.79	202.876	768.367	587.212	6415.16	1.24629	-18.2523
Endo-2	6241	2622	9227.5	0	42384.6	56.1879	165.77	1628.38	1371.65	173.952	8212.56	136.358	10616.6	1497.83	109.333	1036.73	359.006	344.582	1989.62	4375.31	2004.24	1754.44	2059.29	621.206	149.291	1252.64	287.739	978.03	7.37681	-19.3378
Endo-2	6255	2627	9830	0	26086.4	65.3851	144.511	332.414	3422.9	237.856	195.948	264.816	4316.37	1932.37	174.477	176.718	976.741	151.471	1832.1	592.73	1299.74	483.443	945.506	1227.95	146.805	145.546	611.517	75.5805	7.65388	-12.3452
Endo-2	6276	2634	6463	0	35502.1	82.5495	23.0631	40.4144	2962.41	133.171	571.536	92.6937	7689.3	838.725	57.0811	563.514	497.766	31.7973	3796.63	984.486	3909.37	2109.64	970.865	547.252	122.797	943.207	685.734	90.1712	10.5467	-14.8253
Endo-2	6282	2629	6317.5	0	12190.7	97.1146	20.6458	27.3125	5939.46	182.927	7414.76	96.9583	5866.59	1640.09	69.0521	403.292	733.417	35.3438	5366.47	1243.3	3384.19	1497.92	3565.29	1228.65	146.75	1720.27	972.885	397.594	0.545994	-15.5223
Endo-2	6306	2641	7393.5	0	22021.4	108.15	61.225	95.3417	2951.03	169.05	3764.39	239.575	15221.8	1815.25	144.483	1611.88	1398.92	167.583	4205.3	1124.2	2216.07	939.85	1437.2	1345.4	162.475	161.242	969.183	112.758	3.42899	-13.9081
Endo-2	6309	2646	4324	0	8857.28	17.7366	65.1344	69.7097	4756.9	125.183	2368.41	168.129	5207.33	1145.67	75.0215	566.285	1105.56	216	2384.56	712.409	3222.1	857.5	3443.34	1042.83	177.376	406.237	1367.83	113.5	-8.57932	-14.5248
Endo-2	6346	2652	4210.5	0	38790	81.8963	11.2927	94.4207	4128.24	82.8293	4627.67	114.591	28576.9	1419.4	103.402	1320.26	1003.63	177.433	3851.18	1400.32	3177.76	1797.12	4247.99	429.719	143.957	898.11	1258.98	326.726	7.1162	-17.035
Endo-2	6353	2649.5	6283.5	0	24344.8	61.9773	9.04546	4.82955	7953.28	256.102	247.932	334.705	12234.7	3188.44	176.318	482.693	2149.89	5.63636	4559.25	838.898	1750.1	1668.15	1368.35	470.989	71.1932	4792.39	915.886	445.818	7.58877	-14.4675
Endo-2	6356	2654.5	4483	0	17933.6	82.3946	24.1701	2.59184	3553.59	134.19	8372.81	170.272	9784.97	1874.43	173.81	532.374	993.15	12.2993	2434.84	1225.38	1564.51	1615.96	3725.51	782.02	165.912	1031.25	240.408	318.803	0.082061	-15.905
Endo-2	6387	2658	9630	0	51960.2	67.272	92.496	555.192	1134.68	99.24	4784.01	162.672	31865.9	1256.22	124.136	1425.44	539.784	376.576	3042.94	2027.85	3491.32	1737.23	2038.19	374.768	59.912	2950.22	933.112	1174.2	9.9441	-17.8769
Endo-2	6396	2660.5	4319	0	30715.7	20.7681	167.493	1.71014	1881.64	142	1922.67	135.638	8212.55	730.739	26.5797	728.681	846.71	48.3478	2803.46	1615.32	4419.52	1804.13	7456.54	1559.16	199.971	1260.67	1922.35	214.145	5.90782	-16.4826
Endo-2	6403	2669	4905.5	0	36828.2	86.8254	6.59259	2.92063	1042.03	148.762	7334.21	104.905	10808	925.651	41.3227	392.947	511.106	18.6825	3221.26	1282.38	1838.46	1439.97	1589	217.026	71.3122	443.423	1642.43	5403.97	4.57538	-19.143
Endo-2	6410	2668.5	4510.5	0	43745.4	54.6566	0.0808081	0	1333.13	134.874	1161.91	125.465	15975.9	658.071	50.798	168.212	328.556	5.25253	2547.98	975.52	2203.93	1343.88	1606.67	997.207	227.116	1914.75	11223.5	57.0152	10.9734	-14.7559
Endo-2	6421	2671.5	4326	0	44490.5	47.1609	107.414	16.977	1386.33	84.4828	2947.4	128.052	14839.9	1260.27	111.063	1009.48	777.753	217.655	2611.91	1389.77	1563.63	2311.35	4398.55	539.994	166.489	2146.85	440.661	87.092	7.70932	-16.7813
Endo-2	6428	2678	6440	0	29914.7	49.1208	4.02899	16.0048	1439.32	102.841	67.0676	85.8213	10364	514.894	48.6039	362.459	211.802	12.686	1850.22	655.787	774.961	1046.95	1939.71	234.493	71.7874	719.884	519.628	80.1353	8.87921	-10.2452
Endo-2	6437	2677.5	6469.5	0	21233.3	81.3563	64.4023	107.897	3658.57	187.287	1285.04	162.46	9856.82	1992.63	102.776	752.96	485.92	93.4368	3040.24	1358.44	3623.29	1384.95	2226.22	677.902	144.5	1221.73	870.713	115.08	5.52722	-13.3056
Endo-2	6479	2693.5	4527.5	0	31941	86.1354	2.74672	1.77293	2602.73	166.389	1127.93	139.921	10881.9	1120.36	102.227	263.935	1550.36	3.37118	3479.67	1921.82	2271.11	1557.53	847.524	666.956	128.594	1740.86	25765	90.7205	10.5717	-10.6591
Endo-2	6482	2690	4340	0	38638.4	64.532	279.276	36.3462	8138.19	238.506	4733.37	304.115	16322.1	1688.67	135.038	1336.71	1846.35	345.84	3896.74	1517.54	2396.63	1900.72	4763.28	1751.15	227.071	2132.83	2056.37	94.2115	6.98522	-17.1179
Endo-2	6510	2700.5	5633	0	8419.86	54.7162	0	0	2041.99	87.1081	189	111.986	8665.92	1335.4	124.338	41.8784	4967.49	0	2872.55	1358.41	2272.14	1766.41	1110.76	451.784	114.736	273.791	21070.5	85.0405	-4.12919	3.86461
Endo-2	6522	2706	9880	0	24401.4	150.085	4.59788	2.4709	3143.53	92.4021	2709.19	128.275	6122.96	1286.73	102.937	67.6032	613.921	15.9524	2995.23	1003.97	3009.08	939.217	1060.6	749.328	58.5979	143.328	742.339	4148.78	2.31397	-14.7457
Endo-2	6524	2704.5	6372.5	0	10430.6	64.5971	29.4388	54.0144	3080.42	292.101	14201.5	194.281	16574.2	1425.43	124.475	889.683	595.611	189.727	2181.12	1132.08	2428.29	1242.46	1824.21	762.374	203.59	208.604	513.058	31.4604	-1.71514	-16.6373
Endo-2	6532	2713	5246.5	0	32348.4	57.2917	35.3125	10.8	3533.2	189.037	190.696	126.917	7304.54	1102.57	63.3875	286.988	723.308	21.1	3656.53	1315.79	3529.32	1150.75	3050.44	1323.38	230.762	5498.39	475.546	98.4	7.25395	-14.905
Endo-2	6534	2707.5	6786.5	0	26050	76.675	0.116667	36.3167	1848.83	149.725	4364.35	75.1833	19354.9	731.642	91.0333	1393.73	1046.03	25.175	3996.2	756.242	1835.49	1852.31	395.575	309.508	123.2	1000.2	4833.19	149.442	3.5532	-15.3012
Endo-2	6538	2707	5287.5	0	42777.3	135.379	7.25287	31.5517	2576.95	172.092	1255.86	140.805	10619.9	1860.24	204.057	510.264	1811.29	37.2644	4101.16	1542.69	3315.39	4388.48	3488.84	1218.47	134.402	4253.82	506.368	127.345	10.6258	-17.2075
Endo-2	6542	2714	4913	0	13191.3	77.9167	35.0833	16.7549	2942.88	162.735	2112.86	142.069	14217.7	1766.43	85.7941	893.824	1043.27	106.147	3606.15	1595.17	2812.18	1422.13	3633.03	864.515	118.775	319.235	1728.53	170.245	2.60031	-12.7279
Endo-2	6566	2724	8675	0	22708.9	107.51	46.1176	29.3595	5867.72	301.144	1817.09	252.601	19199.6	2351.34	144.83	1303.47	17561.8	98.5556	3525.26	1279.74	2683.9	2206.38	1386.81	1532.91	169.176	1205.8	4867.73	227.438	4.31705	-13.2679
Endo-2	6575	2727.5	9057	0	26452.4	92.6474	119.66	95.1539	2536.42	127.109	3450.85	161.679	11664.1	1868.6	126.276	829.833	442.333	144.538	2913.4	1421.3	2009.26	2746.35	1293.98	908.147	155.84	671.423	367.615	50.9808	3.86616	-14.3602
Endo-2	6578	2728.5	7575.5	0	17610.8	53.6478	152.648	735.535	2481.09	187.453	7273.74	150.151	9275.51	871.352	101.824	1238.3	509.862	322.491	3564.95	2482.83	2703.31	1150.54	3201.47	538.774	124.56	201.692	1220.61	3701.69	-0.0577983	-16.5572
Endo-2	6579	2737	6037	0	10642	71.5398	86.4646	134.341	5091.14	39.8097	192.469	83.8628	6625.55	1266.39	97.4115	621.164	723.92	128.553	3053.61	1378.45	2458.46	1276.17	6596.69	358.407	51.9027	260.836	904.956	72.0841	-10.1709	-18.8713
Endo-2	6581	2734	4930	0	16155.3	94.4603	43.8042	12.4074	5163.82	216.757	5038.19	213.64	16784.9	2038.67	103.497	1490.32	1023.21	103.704	4213.95	1950.2	3395.03	2141.17	929.566	676.085	136.243	150.397	1302.49	1981.63	1.33304	-14.4028
Endo-2	6587	2734.5	5638.5	0	45360.2	71.2111	5.23889	0.477778	2932.02	118.983	222.489	120.694	13783.1	935.106	63.4111	635.594	67.1389	48.0111	2303.26	1113.46	3070.86	1223.78	1088.29	307.806	162.072	492.994	147.044	64.9389	10.8307	-15.4856
Endo-2	6593	2736.5	4952	0	18924.2	191.277	8.3237	5.12139	3142.57	121.347	5371.76	104.514	17510.4	1105.14	59.5954	1231.16	650.85	32.7861	3437.55	1508.66	1868.17	2245.17	1638.31	264.757	50.9075	133.249	1196.08	2829.68	0.31471	-15.042
Endo-2	6609	2738.5	6007	0	25967.3	100.744	16.2066	49.6612	1134.49	43.7025	269.24	99.686	6605.99	894.86	70.2479	602.835	165.62	74.9256	786.851	305.322	859.017	955.479	2911.4	333.455	59.3636	1417.05	156.975	125.248	6.54176	-12.0905
Endo-2	6611	2740.5	4981	0	20571.5	80.6232	14.9203	8.84058	1451.33	125.986	1634.5	61.1522	8676.3	1066.97	54.9203	650.312	601.993	18.6087	2197.99	1635.07	1349.62	1532.18	3583.92	159.645	57.9493	132.268	1054.67	145.725	5.54763	-13.7109
Endo-2	6614	2738.5	8034	0	28163.7	83.3248	48.7949	38.9402	1791.77	205.778	957.103	163.368	6038.07	1483.21	171.786	458.496	840.829	291.504	2067.9	847.957	2743.66	674.325	1954.33	419.667	175.615	670.513	256.932	141.034	7.20765	-13.7294
Endo-2	6615	2741	8658.5	0	50793.9	93.6232	135.804	412.935	5816.78	330.217	1195.06	277.862	19350.6	2334.98	165.609	1462.36	253.514	280.841	2485.46	1127.59	3261.49	1907.08	1717.83	1469.45	125.681	4248.1	608.326	142.768	10.5392	-17.65
Endo-2	6620	2745	5019	0	12535.7	80.9062	228.005	704.203	9251.77	136.073	4059.77	77.2188	11559.4	1462.24	39.9062	1600.29	521.474	176.167	4003.16	2041.83	4087.1	2018.78	4959.21	453.109	98.6562	467.339	570.271	214.109	-8.39053	-17.4549
Endo-2	6630	2748.5	6766.5	0	34154.2	76.1082	21.1753	93.2268	3304.79	151.165	1399.69	123.856	6090.26	1882.87	109.928	560.546	907.608	91.3918	3622	705.856	3126.69	1227.6	1088.82	798.495	126.397	1928.1	3098.5	104.639	9.5799	-14.9535
Endo-2	6631	2749	9870.5	0	17940.1	68.6055	126.828	95.9056	1915.76	156.189	6363.59	111.572	6582.53	1787.6	121.817	547.278	1099.21	296.817	2567.38	1040.71	2284.67	258.894	1609.54	942.956	96.95	179.983	302.722	1621.58	0.913861	-14.8009
Endo-2	6641	2753.5	5119.5	0	11312.9	99.303	21.5455	3.07879	5060.52	143.121	74.0485	159.497	6942.34	1538.85	87.4727	472.248	597.661	9.8303	3309.85	1033.58	2698.22	1778.28	1929.28	1745.64	180.255	824.533	293.582	136.085	1.72276	-10.5489
Endo-2	6644	2757	5009.5	0	26140.2	95.5868	152.467	88.4431	4214.08	179.048	5207.17	231.455	16392.2	1586.95	55.5329	1993.19	829.958	184.701	3524.41	1284.87	2424.98	2727.04	2840.33	1378.57	205.635	1180.76	345.701	226.599	3.85938	-15.1417
Endo-2	6648	2756	4839	0	8999.71	95.5833	2.39167	2.18333	2585.62	245.542	5797.76	187.742	20942.3	1141.47	84.6417	155.033	27556	1.05833	5799.93	1383.58	2139.61	2515.12	1853.81	597.333	179.367	93.1417	51563.3	171.242	6.37851	-4.03762
Endo-2	6650	2756	6782	0	36212.9	79.1824	11.3145	80.0503	3690.18	256.692	723.774	142.145	9574.95	1298.69	142.396	631.321	1495.99	24.283	4925.01	1153.18	2486.92	3216.64	1151.33	912.044	185.151	2428.08	12799.6	76.2956	10.8743	-14.1147
Endo-2	6664	2766.5	11159	0	759.635	96.746	7.01058	430.503	3128.22	219.63	11717.5	83.3757	7290.45	635.011	97.5714	98.1111	4751.11	19.1217	5481.58	323.783	7.92063	907.296	1191.47	69.6508	169.037	185.307	15841.9	1491.49	-2.26755	-16.0531
Endo-2	6699	2772	8944	0	15729.6	28.2063	468.127	0.0952381	659.063	20.4921	2754.19	72.8889	10063.9	1440.62	82.1587	689.937	41614.4	31.4127	8984.75	3588.76	4450	2045.9	2035.9	619.286	40.1746	177.492	16170.1	269.333	-1.56487	0.824544
Endo-2	6725	2781	11064	0	36976.9	42.1575	25.1732	50.2441	3819.87	267.472	4968.06	210.465	10857	1045.13	82.0236	121.063	1315.95	48.0866	3110.69	872.921	1560.75	1704.8	2288.21	781.732	117.575	231.551	2311.37	310.236	6.93789	-17.9086
Endo-2	6729	2788	11092.5	0	16426.7	85.9495	35.0978	14.9148	2056.39	59.0379	2478.5	79.8107	6051.61	910.17	104.35	173.855	3298.89	61.8549	3676.02	511.905	1058.28	638.603	1541.51	273.173	32.429	147.826	18739	170.423	7.26085	-7.26479
Endo-2	6733	2782	5214.5	0	53464.6	107.52	0.08	0	814.2	192.987	602.36	199.027	16310.6	1304.28	71.6933	673.96	708.827	14.7733	2258.21	2730.83	2490.37	4001.73	2583.75	546.973	186.547	3504.6	2169.28	109.693	10.6773	-17.006
Endo-2	6746	2786	11025.5	0	19487.4	94.1727	135.018	19.5727	1914.79	96.3273	3432.34	111.491	13946.6	1966.03	135.955	441.7	1928.87	118.055	2024.54	614.4	2826.2	1395.31	1307.68	331.082	95.0818	291.9	8032	37.9636	3.26984	-13.7325
Endo-2	6756	2796	6513	0	27607.7	55.9588	40.8941	96.8529	2994.48	147.112	139.676	162.335	10577.5	1703.15	61.9177	734.182	108.018	98.4176	3460.84	1370.62	2698.27	2630.68	3116.34	617.365	134.935	710.982	134.1	115.388	6.45829	-14.4584
Endo-2	6761	2793	7543.5	0	23477.9	57.8725	40.8529	15.1275	4142.79	94.5392	0.323529	105.314	10385.4	1323.5	167.402	303.069	633.716	61.3333	2037.99	532.902	2128.76	1231.76	3194.64	334.627	108.706	29.598	163.255	5.08824	6.26642	-13.7637
Endo-2	6764	2792.5	5185.5	0	22838.3	58.5145	0.231884	0	4339.87	224.391	135.623	167.862	8335.44	864.029	44.6594	187.993	482.71	1.5942	2303.22	1659.45	2882.7	1110.17	1709.35	1411.86	238.877	349.906	755.703	92.6232	7.46465	-11.5407
Endo-2	6773	2800	7996.5	0	35052.5	105.516	66.1961	57.5621	4304.33	182.046	719.686	119.621	8311.16	2764.62	224.542	775.804	1499.67	161.739	3572.93	3125.13	2827.91	829.869	5178.24	1129.39	149.085	292.654	1381.86	183.634	6.98718	-15.9942
Endo-2	6778	2804	5197	0	24297.3	86.454	37.954	76.5	3504.85	203.299	229.029	195.356	8699.55	1731.17	118.08	845.661	1226.75	61.2011	3924.01	1766.25	2637.64	1574.91	1545.7	2333.9	291.477	1506.33	499.667	87.3966	6.11756	-12.7279
Endo-2	6781	2806	8482.5	0	16729.4	106.446	103.145	44.1452	3778.92	207.151	1085.34	120.333	9483.46	1378.87	83.7957	469.769	734.328	79.3226	2889.13	1688.24	2594.18	1094.02	499.301	389.699	82.8441	796.366	671.946	753.828	5.79681	-10.6264
Endo-2	6784	2803	5968	0	26117.3	185.009	334.472	230.602	2611.7	40.9537	1663.11	72.8333	3748.84	1565.83	69.2315	527.315	732.583	226.407	3201.37	1010.71	2260.36	591.824	4194.71	659.796	55.2222	210.713	701.472	199.62	6.15871	-14.9551
Endo-2	6786	2804	8034	0	14506.7	81.7838	33.964	2.17117	1786.39	219.207	6264.3	176.252	30191.6	1593.73	123.559	2071.94	942.117	183.757	2687.87	1931.13	1760.32	1844.27	1020.37	962.577	164.604	308.811	549.018	449.73	-0.151389	-14.3712
Endo-2	6790	2804.5	11046.5	0	45199.2	175.01	40.101	11.6768	2530.21	85.1414	2735.59	151.889	16362.3	1447.12	122.545	106.03	3442.65	35.9495	3345.12	913	2313.39	1558.26	1490.33	398.212	81.5152	223.848	3757.04	87.2424	10.0886	-16.2809
Endo-2	6813	2823.5	6507.5	0	32822.9	92.2885	54.5	53.7808	2379.02	140.6	290.196	111.038	12775.4	1518.57	84.0038	910.069	330.223	83.9923	2559.35	1691.56	2061.12	2470.88	4133.33	480.746	122.4	753.977	272.804	170.119	6.72358	-15.1272
Endo-2	6819	2822	11028	0	50696.7	173.865	283.469	276.908	4167.38	236.119	4053.22	226.385	15562.3	2628	140.5	786.427	986.735	486.808	3094.93	1357.4	2967.25	2079.37	2147.65	686.365	102.542	355.754	327.342	220.642	9.29225	-18.8769
Endo-2	6827	2813	5965	0	28998.4	87.7807	293.158	135.684	3077.24	44.0614	1290.69	103.289	6435.71	1593.46	75.693	793.789	765.263	306.623	3681.87	992.404	3037.38	1080.23	3467.77	563.096	65.0175	291.921	981.325	122.596	6.46489	-14.7601
Endo-2	6831	2819	4768.5	0	17405.7	64.2714	13.681	1.27619	1458.31	140.133	9231.06	140.543	15051.1	651.562	57.3524	619.195	372.871	23.8857	2973.35	1396.36	1290.88	2718.57	2758.19	410.448	77.6048	169.733	859.314	157.548	-0.255367	-15.8473
Endo-2	6832	2820.5	5322.5	0	35080.7	133.889	121.661	74.5	3637.26	174.95	4857.8	146.611	10467.6	1710.81	104.667	1185.64	1526.01	161.394	7632.02	1914.87	2615.08	3074.31	2430.61	1111.17	136.006	2672.22	2492.49	91.5944	7.7346	-17.5262
Endo-2	6864	2829	8451	0	36774.9	76.1482	58.2181	244.259	2679.98	114.14	329.198	146.136	15297.2	1464.21	63.5967	746.444	815.185	28.786	3432.81	3914.93	2833.6	1469.21	777.761	587.379	82.1111	3894.04	717.272	337.889	10.6028	-14.9042
Endo-2	6869	2828	10144	0	15627.5	87.68	314.147	782.02	2080.49	184.92	2586.03	240.953	4271.64	2289.31	147.747	542.307	1412.24	384.707	2329.19	388.72	1995.45	362.4	1716.51	1715.95	169.727	88.7867	453.387	1253.54	3.77429	-12.7306
Endo-2	6877	2829.5	11037.5	0	29076	160.074	129.852	40.5833	5641.43	247.593	1860.36	185.954	8003.65	2080.06	98.1574	415.306	4494.24	253.176	4570.77	1066.73	3289.43	1305.23	1311.7	242.417	42.8889	202.713	7805.95	193.019	7.85698	-14.674
Endo-2	6904	2839.5	4614	0	35799.8	116.682	2.38318	28.4393	3591.05	430.944	13.729	415.196	13609.4	1352.44	114.776	340.364	1198.75	56.1776	4033.96	1327.99	1786.42	1840.55	1593.1	2636.85	393.439	206.234	1383.99	14.7103	10.1666	-13.4341
Endo-2	6914	2841	7695.5	0	29121.8	23.7083	53.5729	17.2708	767.792	64.1979	46.0625	135.969	6943.4	1189.74	94.3021	296.26	697.312	119.229	2373.71	1897.03	1463.38	847.333	6249.89	343.677	87.5208	2263.22	565.083	25.7188	5.93381	-15.8624
Endo-2	6929	2844.5	4761	0	35348.4	86.3274	131.177	90.9027	3624.49	234.858	2617.12	250.947	9248.42	1670.98	89.3274	757.425	1183.27	134.062	3083.57	1906.52	2762.07	1484.52	3189.5	1197.7	175.805	215.602	1195.27	187.044	7.31654	-15.6031
Endo-2	6945	2853.5	6626	0	28211.2	48.4237	16.2768	26.435	2216.25	225.09	168.282	116.102	14821.5	1192.05	72.5311	1244.72	9263.76	66.0734	2671.37	1000.96	1962.59	1682.63	432.441	733.469	124.48	453.864	13746.9	65.5141	10.1255	-10.7717
Endo-2	6950	2855.5	5951	0	27249	64.1394	48.8849	60.8182	1143.41	79.9758	372.945	82.697	7359.07	1207.29	73.1515	653.873	1303.32	128.061	2000.06	857.503	1816.98	755.903	2673.35	409.77	58.4667	635.461	666.952	83.7515	7.13414	-13.3888
Endo-2	6959	2859	4734.5	0	19868.6	91.9194	5.11828	18.0484	1753.09	183.446	4155.8	216.505	11372.6	1138.13	90.3387	633.952	680.919	41.9462	2247.33	907.65	1735.32	1376.99	1654.65	984.366	218.839	95.9462	642.737	115.231	1.55991	-13.2202
Endo-2	6960	2854.5	4960	0	16424.8	18.2045	38.053	53.5379	1016.49	113.924	8445.65	36.8485	18908.5	150	34.1818	1323.23	72.75	73.2045	519.758	545.811	657.265	2504.82	796.174	74.3788	86.2273	228.621	422.894	156.833	-1.24417	-14.2183
Endo-2	6966	2861.5	4807	0	18344.1	72.9695	26.7208	15.9645	3876.18	168.533	4223.66	196.746	8705.58	1399.15	90.4518	711.761	706.523	57.5279	3658.78	1072.38	3244.35	1366.01	975.954	645.797	120.919	443.98	1015.59	167.33	1.7469	-14.2885
Endo-2	6989	2867	7847	0	39134.9	67.7738	42.2798	29.7202	2943.22	170.762	6794.15	126.81	8961.02	1406.6	135.685	538.232	771.673	133.512	2370.43	1048.77	1818.1	1562	1248.79	723.423	222.268	424.202	483.375	229.75	7.06676	-18.5078
Endo-2	6991	2869	7920	0	25495.4	66.0055	142.639	180.847	3069.74	260.874	854.667	267.967	12537.5	1851.26	230.678	1008.67	1986.49	113.219	2627.72	1206.95	1463.04	1009.69	1862.66	2039.52	223.049	298.077	3904.8	119.328	6.3835	-12.8255
Endo-2	6992	2864.5	8002.5	0	16646.8	112.074	39.7222	0.324074	2978.47	178.815	3199.6	153.12	21425.5	1540.52	112.648	1508.66	422.667	135.981	2420.3	1043.34	3574.83	2524.25	1197.19	902.157	206.602	90.8056	180.028	1742.09	1.44907	-14.2085
Endo-2	7009	2875	9899	0	17455.7	105.284	145.956	250.265	1734.85	106.593	514.27	138.407	3554.17	2302.04	141.127	514.26	1653.61	545.672	2470.56	630.186	2853.6	188.245	1199.23	844.466	101.873	272.632	651.172	54.6176	4.31695	-12.4903
Endo-2	7020	2873.5	9465	0	35371.3	122.873	113	44.6455	668.714	92.9788	2047	42.2222	10046.2	1514.54	58.5079	878.058	248.063	406.053	1410.21	740.206	2722.07	1536.31	1066.93	151.286	32.5661	829.566	119.286	152.407	9.82444	-14.2792
Endo-2	7033	2876.5	7833	0	16634.7	100.87	39.3611	24.0093	3652.47	186.019	8480.92	185.954	13996	1291.95	112.25	659.278	598.593	96.7407	2829.12	1757.73	1709.01	1655.47	774.343	859.463	136.75	212.454	612.176	395.509	-0.683281	-15.8621
Endo-2	7036	2880	4741.5	0	28644.8	98.35	25.5	20.3056	2965.61	197.978	2841.29	248.85	6889.43	934.767	134.6	329.011	574.867	59.1167	2058.94	713.339	2217.82	1609.49	1166.14	599.894	181.872	296.761	888.617	91.4944	8.70852	-12.0693
Endo-2	7050	2887	4925	0	49543.9	70.9324	320.586	320.91	1735.91	128.932	7250.69	201.311	23216.1	921.054	68.045	2632.51	767.793	817.955	2119.76	1042.48	2016.76	2637.74	2066.52	811.239	126.878	1692.78	1119.11	1059.55	7.21928	-19.312
Endo-2	7068	2892	7779.5	0	28478.5	83.6398	17.6832	4.59006	1650.59	128.348	3.70807	74.7329	7238.14	1308.4	93.4845	168.863	593.919	14.1304	2216.6	917.311	2784.88	1362.6	291.18	680.547	123.379	247.727	381.969	292.385	9.31	-12.1339
Endo-2	7098	2904.5	4605.5	0	1816.97	61.8397	2.51282	1.92949	1692.83	61.9103	8880.34	90.6154	18315.7	887.833	66.6603	1462.92	983.16	10.3526	1881.83	934.41	1566.13	1866.81	2585.06	199.846	65.2244	33.6987	1218.68	6705.46	-1.19573	-17.9936
Endo-2	7109	2906	8487	0	32511.4	56.7467	87.74	12.9533	1419.18	129.46	227.733	189.167	8294.23	1507.59	84.0533	306.073	726.433	132.24	1698.14	354.453	1450.72	711.32	635.4	649.4	74.04	54.54	333.513	23.7933	9.6832	-12.4644
Endo-2	7135	2921	5998.5	0	28453.8	54.1613	5.6129	0.714286	648.816	47.576	536.147	79.977	12699.6	979.931	73.6498	853.23	482.433	34.9171	1272.35	911.304	1676.74	1447.25	1961.13	279.65	39.9585	1251.29	524.687	105.281	8.43399	-12.3905
Endo-2	7143	2910.5	10519	0	41861.4	98.7733	44.4933	646.72	939.453	251.027	5853.56	146.64	9322.08	1101.93	80.76	283.453	311.867	178.467	1720.81	1607.11	1246.09	2374.55	1515.83	165.573	90.3067	878.653	753.52	324.253	7.21164	-18.4306
Endo-2	7145	2920.5	8673	0	45778.1	85.2359	101.113	23.4103	1809.79	52.2154	1063.15	109.764	18765.4	1515.58	68.8051	1226.86	267.949	156.226	2167.19	616.195	2394.78	1886.25	541.81	668.359	71.7949	5814.5	214.964	146.154	10.9824	-15.8966
Endo-2	7168	2924.5	4600	0	15473.4	75.966	11.3878	1.71429	2706.41	95.9116	7479.64	70.3878	12363.4	1041.35	59.517	1201.39	817.225	18.0952	2570.95	1075.41	2667.2	2234.73	2142.25	167.408	71.0952	1100.23	1112.44	4704.19	-0.0633341	-17.0038
Endo-2	7185	2926	10530.5	0	47644.1	151.043	21.5161	935.731	719.419	264.043	6974.57	94.1183	8768.3	1467.85	110.129	276.667	338.656	151.194	1818.83	3562.59	2070.28	1550.66	1929.97	17.4624	26.9032	4120.23	359.527	759.129	7.62213	-19.3262
Endo-2	7202	2937	5441	0	36092.2	71.2116	44.8836	29.0899	1534.22	156.222	68.8307	94.164	17557.9	798.714	54.3492	1089.14	1766.59	45.0847	1122.68	1300.66	1711.9	1326.13	1215.23	287.635	105.952	136.132	976.624	92.3862	10.2274	-12.916
Endo-2	7205	2938	10993.5	0	36399.6	146.443	132.532	335.378	2109.35	196.552	4058.88	177.025	8627.37	1989.19	117.174	401.896	896.075	408.164	3580.03	2049.9	3151.31	1762.62	1463.1	588.707	117.05	588.642	804.443	796.09	8.64971	-17.3795
Endo-2	7220	2942	4526.5	0	27971.4	36.1358	0.17284	0	1331.3	47.4691	2.89506	64.3272	7947.54	471.667	31.5062	122.488	203.037	2.61728	1453.09	763.179	1559.69	744.716	842.451	41.8889	35.4444	88.463	405.327	97.142	8.83328	-9.47718
Endo-2	7233	2945	10967.5	0	45807.4	204.73	309.354	122.296	3034.64	195.021	5464.69	261.18	14123.2	4083.3	288.185	1089.89	1989.58	677.355	5605	1235.75	5723.43	2579.61	1362.73	1712.64	244.386	499.286	563.937	921.862	9.43876	-19.5257
Endo-2	7246	2949	3404.5	0	25459.1	83.8889	61.7407	48.6667	3405.86	91.7531	2007.82	97.0926	7259.78	1596.03	136.932	469.395	352.469	165.975	2550.6	767.66	3363.85	1140.8	2902.34	308.809	66.5062	2185.09	497.926	107.315	6.21302	-14.3011
Endo-2	7278	2960.5	8429	0	45932.6	65.2546	196.718	1671.34	14805.4	282.306	229.676	253.287	9879.34	1724.32	86.5278	887.356	1067.14	408.986	2951.25	2829.57	2774.22	710.352	1432.87	980.19	137.824	10747	459.968	160.208	11.491	-17.3607
Endo-2	7290	2962.5	3768	0	15159.8	87.3281	0.917981	1.07256	6554.5	213.994	392.214	240.524	12816.5	1582.85	249.451	5.71924	1156.66	0	4722.64	1227.81	5265.06	2078.09	1229.01	849.678	179.943	464.754	31569.5	137.688	-2.1792	5.87372
Endo-2	7318	2976.5	10956	0	11881.1	138.1	55.3515	19.0962	2454.07	219.151	4319.88	197.343	6014.28	1468.95	116.82	121.866	4298.85	60.6234	3386.08	620.431	2082.23	1440.08	461.377	370.188	118.933	156.916	4327.87	409.155	-0.461351	-12.1859
Endo-2	7346	2980	3763.5	0	14804.1	75.7346	5.47531	2.58025	4572.28	222.833	564.117	257.235	8807.97	1342.76	187.5	2.97531	1100.83	0	3631.79	1064.94	4665.46	1427.67	177.068	654.809	146.784	434.339	33081.3	117.673	-2.2583	5.94219
Endo-2	7363	2985	10251.5	0	25478.7	99.3025	237.407	492.969	1892.79	174.364	1984.79	162.469	2933.9	1972.93	126.944	660.025	1109.4	396.105	2504.59	961.457	2718.73	536.179	2307.6	1028.19	114.025	326.142	800.926	88.2901	5.47389	-13.4691
Endo-2	7370	2988.5	8453	0	41082.2	100.339	248.017	514.621	2269.71	77.6609	1100.04	225.81	6393.59	2579.76	130.172	748.305	1655.53	449.454	4131.4	1888.38	3533.99	528.201	3188.91	1722.38	197.701	1282.24	608.759	128.862	9.04891	-17.4395
Endo-2	7386	2989	6455.5	0	24432.5	66.2889	32.0889	79.0741	2948.83	158.593	196.163	155.904	4327.3	1326.4	66.4667	663.304	740.133	96.1111	2849.13	583.007	2723.04	1276.59	624.304	794.348	152.237	456.733	654.4	76.8	8.62854	-11.776
Endo-2	7389	2994.5	5955	0	24980.9	92.4595	73.1216	33.6486	502.635	48.2478	4092.37	82.5631	15764.2	938.311	71.4189	1447.25	421.383	232.644	1174.71	1144.31	2793.51	2039.73	1101.85	383.847	106.243	957.752	586.64	200.378	3.49626	-15.037
Endo-2	7391	3000	9491	0	23657.9	102.513	160.169	185.597	3019.97	127.042	5262.77	122.831	9119.21	1557.52	77.7034	678.419	1010.46	268.36	3303.21	1101.13	2900.66	1160.39	1147.75	446.072	62.2203	992.25	646.657	1414.68	2.53542	-15.1345
Endo-2	7400	2999.5	10213.5	0	25427.1	139.588	196.502	636.348	3045.43	156.181	5077.19	162.511	17475.8	2135.14	121.548	805.344	1207.01	259.977	2739.95	887.873	3247.29	1037.45	1729.33	880.222	42	2277.07	975.543	4663.15	3.03234	-17.6712
Endo-2	7401	3000.5	10982.5	0	45186.7	97.0932	280.424	1241.44	1857.67	186.331	8447.07	93.2415	10089.2	1367.57	60.1017	693.352	347.042	567.869	3063.3	1269.99	2488.19	1843.11	1620.39	209.797	38.2288	295.775	423.025	249.89	7.03616	-19.6228
Endo-2	7414	2998.5	8485.5	0	17118.6	85.1812	140.275	4.98551	2096.18	137.601	8573.54	243.906	21899	2031.04	99.3406	1084	1302.75	193.225	3130.22	801.007	2002.46	1641.78	348.681	1268.09	154.71	144.507	487.558	436.167	0.310522	-15.6013
Endo-2	7415	3003.5	10294	0	19486.9	77.1389	440.875	595.824	3104.93	184.838	1905	249.824	5889.68	2164.5	153.051	749.046	195.579	431.199	1747.44	498.69	2477.5	295.343	1682.32	1221.07	145.236	261.667	113.801	202.338	4.28938	-12.8371
Endo-2	7441	3007	8447	0	50871.4	85.413	223.42	434.101	3762.67	263.384	1220.98	243.217	6439.04	1885.32	146.674	759.493	1337.44	402.355	3606.76	2258.85	3168.78	471.42	3038.26	1391.04	154.174	2133.54	422.029	28.029	9.567	-17.6173
Endo-2	7453	3006.5	5926.5	0	19156.8	134.99	285.392	32.6569	1807.52	66.8529	5759.52	193.853	21757.4	2228.4	149.069	2714.96	1208.67	473.853	2848.02	2604.18	3728.86	4210.61	3587.26	766.01	169.078	612.833	694.304	143.245	2.11186	-15.3565
Endo-2	7456	3006.5	8664.5	0	20572.5	31.6349	7.15873	29.9683	791.984	70.0159	3731.75	24.6032	9300.56	643.508	17.1587	447.143	198.286	20.5556	1737.27	2133.13	1450.08	1151.49	980.889	42.8254	17.7937	827.206	205.952	199.333	8.02405	-8.22774
Endo-2	7471	3014	6228.5	0	18952	48.2439	127.354	396.719	8970.46	174.634	1338.17	53.7439	34.378	953.171	88.5122	85.7683	614.756	35.6829	2050.28	40.7195	4039.07	28.939	206.915	645.78	126.78	34.4512	660.037	114.049	6.92253	-11.7396
Endo-2	7473	3031	10977	0	49527.7	121.035	464.695	716.33	2596.12	204.723	5653	156.468	6125.73	2072.21	136.273	793.007	777.699	566.216	3425.43	1209.73	3887.34	1525.41	1543.59	850.642	131.713	239.206	646.057	421.702	9.06488	-19.0967
Endo-2	7481	3019	6237	0	21203.5	58.1192	29.4702	152.358	3387.07	126.013	1041.49	130.371	7385.36	1155.43	78.0265	332.179	343.589	46.7417	2295.93	364.126	3581.48	785.404	889.55	638.027	125.338	71.9669	428.066	101.318	6.93791	-11.8521
Endo-2	7513	3034	9527	0	21986.8	103.448	374.104	205.213	2706.96	110.049	4967.32	114.087	4798.09	2263.67	156.77	817.415	789.421	576.792	3752.78	855.945	2907.84	1019.95	932.098	687.77	61.1093	80.1421	429.978	1772.5	2.4585	-14.2964
Endo-2	7544	3044	4593	0	30295.8	65.8461	49.8	2.99487	3131.03	76.9231	480.697	103.103	10486.8	633.856	24.159	724.226	494.046	53.4103	2468.05	1434.94	2206.03	1710.74	2823.5	127.462	45.9333	1141.76	856.79	124.446	7.86246	-13.3285
Endo-2	7553	3050	4888.5	0	38499.6	64.6393	4.02186	54.7541	1349.01	157.94	61.0984	99.459	10425.9	1040.13	28.9781	547.071	463.929	14.1585	2108.74	1304.67	1482.53	1721.23	3824.04	386.798	72.9344	3874.09	571.694	85.6612	7.7756	-15.0598
Endo-2	7558	3047	10718.5	0	39297.9	112.383	206.038	64.7104	865.131	58.9945	1103.37	65.8852	8079.57	2996.68	146.219	323.404	1611.61	184.41	3184.62	517.607	4497.25	1086.12	246.486	608.956	45.0055	302.295	872.847	275.776	9.70909	-18.8646
Endo-2	7565	3052.5	5010.5	0	28627.3	77.4828	18.3506	30.1092	1458.9	95.5977	856.695	168.195	16141.9	738.575	41.1667	921.879	358.626	25.7241	1355.59	1070.24	1175.97	1654.9	1158.05	225.046	90.1034	189.937	154.718	368.167	8.96557	-10.2075
Endo-2	7568	3053	7010	0	30982.6	65.0774	106.988	40.1667	6111.79	103.994	918.387	121.577	13856.8	1497.73	81.6429	1344.12	718.804	211.673	3531.81	1470.58	5697.92	2136.45	1583.3	708.268	170.833	93.7619	595.184	73.6667	9.04153	-15.2557
Endo-2	7572	3052.5	10155.5	0	39294.2	120.627	213.216	61.085	1943.03	117.464	4390.47	183.882	9827.73	1786.78	96.9216	584.915	965.51	254.301	3206.67	1081.3	2831.12	1434.78	1948.15	983.477	113.15	154.163	605.392	3442.43	8.16025	-17.8927
Endo-2	7610	3079.5	3831	0	31320.3	119.704	64.7143	58.1191	3196.05	241.471	11124.5	289.325	20852.2	1882.19	177.532	1201.89	4253.98	112.294	3123.49	1259.42	3216.7	2843.75	1892.69	1389.26	215.246	1962.27	6037.64	78.09	2.33821	-17.4322
Endo-2	7624	3069	6045	0	28356.3	214.398	16.8009	5.65929	734.35	74.1947	295.597	175.832	7161.32	776.788	117.619	792.85	362.717	102.792	1625.29	572.752	1616.64	696.022	1118.9	452.85	69.5664	1296.79	425.721	255.77	8.90979	-10.2536
Endo-2	7639	3076	6096	0	25083.4	159.033	120.447	59.9451	2827.66	118.674	576.916	112.194	7030.99	1578.79	112.59	690.681	849.227	445.326	1862.45	519.619	2645.53	720.835	1026.92	557.648	97.5275	1173.79	710.623	388.835	8.38869	-11.9193
Endo-2	7648	3076.5	8364	0	14186.3	104.875	114.176	981.631	1934.98	135.341	2476.96	236.847	15693.7	2444.39	111.466	876.688	1794.93	119.972	2929.64	2166.47	2001.78	1044.16	821.136	1496.02	184.358	4463.72	616.699	325.545	-1.7896	-6.74486
Endo-2	7685	3098	5998	0	24702	98.308	33.5833	3.68841	1941.9	50.8297	10912.6	98.4239	6516.74	1202.23	67.2862	494.978	580.464	26.3261	3619.83	875.493	1506.41	1223.69	418.732	255.935	51.3478	1287.28	583.022	134.576	0.235955	-16.644
Endo-2	7739	3114.5	3823.5	0	40.9929	134.652	0.0992908	0	14386.6	268.553	11626.5	197.135	8744.01	2044.85	456.596	7.14184	40090.8	1.17731	15840.2	3009.82	5040.51	2324.3	634.738	1297.42	312.596	192.731	44759.2	157.142	0.291624	-2.74844
Endo-2	7748	3114	5376.5	0	21106.3	55.373	122.397	40.8254	1452.27	115.159	5925.49	125.984	19525.9	1524.81	106.214	1796.51	1179.08	277.532	2368.65	1170.66	1523.23	1377.71	1181.07	993.746	108.452	716.611	897.651	97.5238	1.48272	-15.0376
Endo-2	7754	3124.5	7610	0	13396.2	84.4194	194.473	1883.23	1375.16	213.694	473.737	169.344	14509.5	1190.28	105.763	795.021	732.043	229.414	1171.39	560.134	1602.68	514.812	769.398	880.328	156.263	1923.23	519.5	318.339	3.61265	-9.16257
Endo-2	7765	3128.5	7031.5	0	24501.8	85.3131	48.1061	137.732	2775.6	191.783	2663.59	169.227	5050.98	1261.86	87.6465	588.293	681.53	87.1212	2119.02	582.46	1746.96	1055.01	525.828	564.818	144.98	98.0859	461.172	74.1364	7.52009	-11.1336
Endo-2	7783	3133	7010.5	0	21913.8	91.8152	23.5261	72.3318	2894.17	173.289	5055.72	149.28	4872.64	1281.18	108.749	655.355	646.502	104.664	2816.91	792.175	1881.68	1218.18	626.545	628.91	158.36	94.5877	538.341	117.237	2.54069	-14.8072
Endo-2	7870	3168	9463	0	20899.1	105.505	79.1979	43.224	1525.91	129.151	2607.99	129.208	9357.57	1358.88	194.969	500.323	1572.55	60.3333	2597.64	595.453	2455	1092.32	274.005	539.724	85.3542	164.896	1946.64	316.839	3.88618	-13.2185
Endo-2	7934	3187.5	4919.5	0	9585.72	58.4123	8.86842	18.0175	2216.52	117.228	15554.1	122.947	6604.01	1245.58	55.6228	377.298	857.193	25.9737	3057.66	1648.39	1195.67	2209.25	1591.57	1045.19	122.237	85.0965	1370.15	141.123	-1.66567	-16.7156
Endo-2	7959	3194	4932.5	0	22986.1	80.1061	42.6742	64.3788	3856.46	176.098	7334.39	125.508	8709.85	1607	65.2727	823.826	889.386	31.8485	2914.92	2096.39	2373.48	2088.11	1499.64	475.75	87.7576	313.97	856.97	164.591	1.55965	-15.7431
Endo-2	7985	3205	4938.5	0	27396.3	69.6098	23.0407	26.5285	5996.28	163.439	10109.7	153.667	16739	1465.48	94.2764	1032.85	894.203	45.2764	4516.59	2213.8	4698.63	2254.63	1829.68	929.285	144.496	439.163	795.935	287.919	2.53966	-17.4975
Endo-2	8001	3211	8316	0	20851.1	56.7464	253.355	242.319	1557.21	189.159	1137.03	192.29	9330.06	2219.35	140.529	654.804	1658.94	246.072	2169.78	468.623	1677.86	746.268	638.399	1013.87	119.493	167.623	482.159	170.174	4.09151	-12.7513
Endo-2	8002	3216.5	6454	0	40797.6	116.552	122.856	231.608	3400.01	122.635	6208.88	127.956	21267	1393.6	62.1326	2318.53	950.121	370.895	4647.13	845.133	3943.69	2193.8	635.867	590.099	132.188	4811.82	918.028	1647.46	8.28752	-19.4963
Endo-2	8011	3221.5	4934.5	0	23669.3	54.7157	4.39706	13.4559	3200.75	61.0833	2614.06	92.0196	7883.21	940.966	52.0588	260.828	594.691	38.2941	2859.96	899.157	2413.43	1128.96	496.167	183.363	70.6716	318.088	1182.85	141.515	8.37483	-10.0258
Endo-2	8059	3224	7800.5	0	39669	28.2963	39.8272	221	1544.67	99.1235	217.457	63.037	8238.47	881.358	107.21	293.79	4760.44	142.852	3148.15	939.296	720.605	1102.47	2410.65	626.716	211.481	148.42	10208.3	66.679	9.76073	-13.2224
Endo-2	8085	3230	7805	0	24471.3	38.9048	25.9841	76.0952	2524.46	57.9048	71.7143	68.3333	6980.21	1059.4	64.3968	212.127	4527.06	70.2381	2292.21	2114.65	2679.62	788.476	2024.11	328.841	58.5238	507.889	11406.5	110.937	7.33686	-11.9256
Endo-2	8090	3240.5	8751	0	29618.8	90.5533	231.365	1248.08	2478.69	303.305	7010.83	279.792	15702.1	1983.07	98.9645	1481.11	1201.4	378.223	2722.58	502.518	1731.29	2342.53	1116.16	1285.44	201.228	1194.67	589.629	1402.1	2.45075	-16.4151
Endo-2	8113	3243	4789.5	0	38732.4	42.5641	133.949	41.6026	1312.19	67.5513	3302.87	83.1667	11942.7	2012.71	88.2564	907.256	63.8205	87.641	1654.6	693.679	2938.94	1236.64	960.577	911.987	103.372	1316.4	37.1282	132.859	9.19976	-16.5432
Endo-2	8155	3257.5	6784.5	0	35085.4	80.9231	34.9915	14.547	2416.53	106.872	4025.26	102.615	12619.6	1230.45	83.3248	1517.22	571.256	40.2308	2537.8	1357.69	1540.04	1396.83	1132.15	218.504	78.2479	2559.38	665.282	204.444	10.0373	-14.2406
Endo-2	8188	3267	9112	0	9665.05	144.964	91.2162	320.126	1797.23	60.4054	6028.46	75.8919	9271.45	1533.68	87.2523	822.18	1322.82	334.613	2638.27	439.541	2938.53	1188.22	555.901	300.288	41.3964	150.505	1470.81	3190.67	0.100958	-14.4069
Endo-2	8189	3271.5	10110.5	0	13871.5	96.3333	250.097	208.25	3099.85	135.444	5477.59	146.208	4584.03	2066.4	119.236	539.181	954.812	232.757	2607.69	422.715	2873.86	1250.02	1140.88	690.361	113.153	273.965	477.833	495.514	1.48348	-14.188
Endo-2	8193	3284.5	6360.5	0	44261.3	99.6667	139.267	131.972	1816.16	178.201	5895.71	147.073	15948.1	1097.08	88.7847	1619.98	573.486	248.868	3321.15	1032.82	2141.82	2451.42	686.09	621.889	179.76	400.823	469.944	91.9306	7.48944	-18.7281
Endo-2	8201	3274	10142.5	0	45421.4	65.5892	65.1395	931.031	1998.4	225.403	6078.58	94.2636	6117.26	1488.04	63.8527	338.713	754.845	171.271	1690.35	1828.27	1814.74	312.651	1000.3	273.24	60.7752	904.667	313.899	814.814	7.55469	-18.8317
Endo-2	8206	3272	9369.5	0	33121.8	84.5625	124.01	72.7708	1488.17	143.729	384.51	232.594	8694.41	1332.48	97.5729	589.583	148.083	236.854	1460.49	437.021	1667.55	920.094	732.594	882.979	156.24	191.531	208.677	141.312	9.7833	-12.6158
Endo-2	8208	3278.5	8664	0	23020.8	84.4368	111.668	5.24211	3075.32	87.0316	3752.42	93.7	7121.47	1534.93	135.2	328.616	990.905	22.2895	6150.34	1153.94	4524.94	1171.48	330.568	504.195	70.3684	124.421	10371.7	408.426	8.03925	-14.1083
Endo-2	8227	3289.5	7449	0	18858.8	101.443	172.401	1816.34	1761.29	146.05	9004.55	82.2977	9924.7	1327.52	63.7786	760.202	553.366	249.294	2153.05	1719.3	2057.92	1413.55	853.752	408.58	69.145	3699.55	188.5	6025.53	0.612318	-17.0349
Endo-2	8236	3292.5	7164.5	0	24718.7	94.4837	462.528	412.915	8313.6	402.898	5509.3	355.504	13011.6	2287.13	263.358	2166.52	1886.47	436.638	5618.38	2392.72	2742.1	2969.88	4084.17	3078.33	374.577	177.451	593.736	927.256	4.53309	-15.9558
Endo-2	8244	3289.5	6013.5	0	21969.8	59.6202	201.186	153.256	5286.38	126.295	2461.23	191.783	6619.53	1663.29	148.597	690.015	845.853	136.853	5291.97	3312.01	4285.3	2696.53	3274.43	692.442	220.729	727.318	549.372	361.287	5.66061	-14.4529
Endo-2	8251	3296	10105.5	0	34738.4	102.418	342.25	246.652	3315	176.029	9824.98	207.316	9568.31	2475.1	152.012	757.922	1450.59	432.303	3343.44	814.389	2967.27	1940.25	1431.27	1089.07	125.713	874.258	755.299	1837.75	2.81357	-17.6209
Endo-2	8329	3325.5	8916	0	44795.2	62.9926	21.2778	0	2677.47	203.404	459.715	191.17	13509.5	1578.59	133.411	297.948	915.981	36.4333	2398	1440.67	1724.34	1660.66	601.641	956.678	138.037	646.2	502.27	136.467	10.6524	-14.9587
Endo-2	8369	3330	6080	0	16208.4	41.1977	16.3277	31.9379	487.819	71.5424	1128.36	102.011	11562.8	844.723	44.5932	2251.09	222.768	148.435	1446.62	309.243	1775.54	332.802	5093.47	595.243	59.2712	145.266	374.435	61.4576	5.40844	-15.3927
Endo-2	8403	3336.5	7223.5	0	26836.3	61.6813	140.614	71.3426	3572.77	167.307	183.235	138.59	6965.66	1535.5	99.9363	445.681	963.857	61.9044	2248.39	976.653	1996.98	740.219	1206.77	745.693	156.733	970.805	1740.08	121.629	8.17679	-11.9168
Endo-2	8414	3338.5	3881.5	0	33033.4	106.486	10.9864	2.18636	2836.74	198.323	3941.39	165.832	13868	1329.78	165.445	370.359	561.541	5.21364	2991.42	1703.52	2357.57	2370.38	783.664	876.618	239.059	584.286	1833.35	850.05	9.49472	-13.7812
Endo-2	8431	3343	5285.5	0	50258.6	70.7632	179.675	33.5175	2212.64	118.956	4392.93	100.684	5340.64	1416.42	78.7982	554.009	822.711	176.781	4148.96	2317.89	2415.66	1614.67	599.316	503.211	90.9474	250.412	860.982	567.509	9.76681	-17.3555
Endo-2	8445	3345	10644	0	41088	163.363	317.685	702.927	2467.48	379.315	2882.08	340.476	20426.2	2494.24	303.5	814.75	1993.37	408.331	4027.75	1653.04	3989.01	2400.85	914.564	1406.77	304.685	487.347	4974.9	581.274	9.51482	-18.73
Endo-2	8454	3353	6376.5	0	14129.8	124.179	197.067	198.218	4784.41	234.704	12396.7	221.352	9299.4	1466.63	121.145	1084.57	568.687	298.43	4143.07	1162.51	1708.78	2199.64	1710.55	833.715	157.296	1478.79	398.318	3773.83	-0.658295	-17.3448
Endo-2	8457	3354.5	4640	0	29437.7	67.5636	3.64242	4.99394	925.085	116.091	40.0182	122.836	4104.01	662.655	56.6121	45.9212	573.618	0.321212	905.061	1057.85	717.188	767.558	1851.78	220.618	70.5636	871.485	1003.45	97.4848	8.8534	-10.2296
Endo-2	8471	3354	10607	0	22666.3	82.5026	40.8359	57.9282	2853.48	222.954	4623.47	269.051	7710.44	1017.17	80.4615	190.149	365.954	65.9641	2204.08	843.446	2061.8	1153.23	1020.6	495.272	89.2615	70.1897	628.528	128.682	2.89165	-14.9635
Endo-2	8472	3353.5	3906	0	42487.5	160.66	0.487179	0.762821	1693.83	215.859	4022.81	176.827	14709	1497.63	189.737	655.224	169.596	12.5641	2847.79	1661.47	2690.12	1861.4	1019.02	501.365	145.987	588.378	839.199	2635.37	8.6285	-17.7594
Endo-2	8485	3355.5	5277.5	0	26939.3	72.8833	116.275	52.6833	2807.15	249.467	10005.8	181.108	8757.74	1864.86	120.025	920.508	898.55	173.883	4424.62	2575.92	2229.76	2010.16	1601.26	819.342	173.117	299.233	947.25	655.525	1.68658	-16.7952
Endo-2	8540	3381	7463	0	17357.3	106.825	205.166	189.694	2032	208.48	2095.09	236.952	10694	1234.48	71.2358	1025.47	728.712	238.76	2233.58	1328.35	1611.35	818.389	3404.14	1047.73	130.568	2433.62	62.9738	225.895	2.51364	-12.387
Endo-2	8552	3385	6386	0	15838.2	73.0481	58.3702	61.3654	1639.91	133.346	4343.17	116.582	10674	1182.51	85.7981	834.721	674.615	69.1106	2499.63	894.803	2862.42	1900.53	902.635	495.524	104.192	517.495	958.981	3081.69	0.455951	-14.1178
Endo-2	8555	3379.5	7128	0	31122.3	101.485	128.682	189.152	780.606	104.091	6409.35	185.318	6042.42	928.273	85.8788	494.894	470.758	192.212	2216.05	1080.23	1396.24	1121.08	956.455	746	138.076	92.8939	708.439	2240.3	3.50076	-16.0646
Endo-2	8568	3389	8451	0	24433.7	74.5297	12.2511	0	1424.94	94.1005	1081.98	154.662	12051.8	1740.19	112.42	207.525	1052.4	16.2055	2839.78	898.708	2619.55	1021.23	530.315	742.279	82.7169	147.826	1867.68	117.849	5.49145	-12.4299
Endo-2	8576	3388	6829.5	0	28278.6	62.4865	20.1351	111.766	1120.59	109.036	158.225	90.7117	9541.3	824.171	58.4865	989.009	472.901	102.91	1324.08	890.46	1093.14	1074.81	2900.61	375.27	123.955	108.703	699.55	42.1351	7.42539	-13.1071
Endo-2	8599	3401	6783.5	0	14838.2	53.8578	9.32353	1225.17	1934.01	175.863	1210.79	138.73	6651.76	808.789	69.3628	388.897	475.368	36.201	1480.32	745.338	1087.51	924.471	398.672	298.431	116.074	1130.2	525.926	96.4118	3.76052	-8.82604
Endo-2	8608	3404.5	7449	0	52076	108.87	72.4565	90.8043	1285.89	134.603	1747.1	111.429	20502.3	756.027	57.4022	1723.14	341.522	201.337	2787.87	1008.05	2321.16	1290.92	1015.46	639.337	106.582	6434.65	58.4293	243.462	11.1736	-16.2079
Endo-2	8613	3400	6225	0	23357	48.6381	0.819048	249.629	691.971	184.029	6667.57	124.819	15955.2	969.381	68.3809	1250.73	627.752	166.048	1670.26	873.39	2663.41	913.4	1004.63	645.143	172.495	1233.25	362.762	125.895	2.59602	-15.4331
Endo-2	8631	3403.5	3442.5	0	31777.9	65.2453	8	3.13208	2341.64	135.113	41.3113	152.821	14357.1	1046.55	111.028	282.613	977.396	32.1226	1761.4	622.519	2061.2	1045.43	1075.27	558.717	146.321	1451.42	2573.8	81.4623	9.83424	-12.4565
Endo-2	8641	3411.5	7109.5	0	51790.3	112.156	40.9849	1.32663	1778.09	151.513	3012.06	164.548	21446.7	1335.72	124.573	796.643	583.935	132.07	4475.1	1907.01	2870.9	2887.16	1121.21	697.065	195.518	201.528	485.668	2022.91	10.0798	-17.2684
Endo-2	8642	3416.5	10240	0	18736.7	81.3607	69.5738	2179.18	2003.61	257.426	876.234	195.611	5525.78	1351.59	95.9303	212.43	675.258	121.393	1711.46	568.557	1734.14	1458.21	482.389	382.184	79.3156	1216.49	3946.9	154.848	3.82984	-9.57415
Endo-2	8645	3415	4991.5	0	32610.1	81.9231	1.22051	9.46154	924.877	83.9436	34.7641	95.7385	7473.4	1170.88	44.8462	415.662	711.697	43.4923	1902.17	1867.78	1966.64	1696.2	1614.98	299.344	75.041	1159.95	1019.99	73.5897	9.60769	-12.7714
Endo-2	8646	3411.5	5204	0	25789.4	79.2655	37.0508	14.6497	3640.08	51.0678	402.119	63.7797	10212.5	918.299	51.5989	688	631.441	39.0057	2198.72	760.768	4822.29	797.627	337.621	168.701	57.1582	1037.94	838.418	78.1638	8.73067	-14.053
Endo-2	8661	3411	9142.5	0	41296.5	144.048	136.083	55.5595	632.357	60.5	4112.73	90.6071	10824.1	1787.48	112.619	767.905	1254.9	480.333	2415.92	686.226	3240.81	2773.99	1070.11	470.952	78.5	1305.39	839.464	196.607	9.16141	-17.4052
Endo-2	8667	3414.5	4619.5	0	16536.4	8.92708	1041.68	2340.83	1172.4	132.5	1757.97	98.4583	4309.98	919.344	95.9583	1111.41	383.958	904.135	2417.7	824.417	540.771	757.74	1554.38	171.24	41.5417	1003.27	1886.97	140.26	3.67398	-9.03789
Endo-2	8692	3427	3391.5	0	44591.7	66.533	256.771	119.216	3640.37	135.308	137.084	138.093	6079.34	1854.13	196.388	422.145	807.396	79.3568	2388.49	607.595	2565.01	895	1411.34	580.665	115.207	3035.25	964	133.674	10.3144	-15.8752
Endo-2	8706	3432	7083.5	0	29376.3	102.244	14.4286	0.160714	3154.52	171.298	2806.29	135.244	31588.5	1047.29	115.482	1101.68	475.536	130.857	2847.8	1224.85	2122.83	2322.04	1100.05	391.405	109.119	185.72	609.101	696.399	8.86416	-12.2447
Endo-2	8712	3434.5	7510.5	0	30952.8	52.1176	156.301	165.268	2061.46	110.706	112.268	87.6209	3521.74	1357.72	123.68	286.784	809.261	245.961	2676.97	792.673	2825.76	379.137	1402.82	535.608	101.033	334.987	620.706	124.542	8.96624	-13.3437
Endo-2	8724	3438	7563.5	0	28807.4	58.2453	39.8491	48.4088	3411.72	150.528	535.264	189.931	5295.82	1559.91	142.711	161.855	1128.62	41.1824	2787.92	844.711	1641.33	832.686	856.981	837.05	138.969	249.56	2564.91	131.912	8.60646	-12.0428
Endo-2	8739	3446.5	10113.5	0	53031.8	114.366	55.5902	161.049	2467.16	223.699	3598.12	211.803	6783.65	2003.36	134.667	240.902	936.568	106.568	3402.78	1117.88	2547.45	1395.58	972.393	826.333	111.803	99.8197	2718.21	1302.46	9.82868	-17.5761
Endo-2	8744	3445	8438	0	17109.4	131.365	2.46154	0.179487	2190.17	75.5128	2052.86	229.583	22375	1543.78	152.192	442.423	778.776	2.28846	2295.62	899.346	1885.05	1938.24	146.833	797.006	124.949	183.744	214.603	147.981	4.82394	-10.9328
Endo-2	8776	3454.5	7661.5	0	31058.9	52.1733	8.6	0	3005.15	321.947	0.466667	148.707	12063.1	1069.92	110.267	21.88	7909.99	0.16	2260.64	1401.43	1867.79	1194.8	183.147	861.373	326.907	287.133	16856.9	114.853	10.2486	-10.7826
Endo-2	8805	3469	10101.5	0	57509.6	165.765	77.3072	13.5422	1357.39	95.494	5100.48	127.283	9945.25	2348.28	153.03	446.771	1283.73	211.946	4087.76	868.422	3313.49	1484.81	1554.36	733	102.319	364.217	1196.36	2373.63	9.13009	-18.9408
Endo-2	8821	3475	8995	0	27322.6	103.195	13.1498	1.44195	3247.22	120.536	400.914	165.712	8267.86	1186.2	171.753	210.865	903.787	13.1536	2978.33	1278.29	1752.46	2233.82	513.835	383.356	96.9738	299.625	12298.1	120.67	9.86018	-10.8792
Endo-2	8838	3488.5	4188	0	14109.8	93.4823	59.3235	289.638	3002.25	232.712	11723.7	200.006	10076.8	1530.88	96.0235	1069.98	393.474	136.621	2537.38	2486.84	2598.04	1411.81	809.053	945.041	151	1702.78	393.032	165.976	-0.986041	-16.4588
Endo-2	8849	3474.5	7655	0	39466.3	78.9444	26.5417	3.01389	535.458	216.111	129.319	114.792	14827.2	938.347	108.972	311.542	374.139	52.8056	727.806	2626.68	854.764	1892.46	584.403	608.5	118.389	802.236	163.361	100.667	10.8702	-13.4363
Endo-2	8855	3483	10770	0	40502.3	147.489	276.826	2022.9	1273.82	259.226	4121.08	133.895	8168.45	2547.38	176.937	535.563	1186.27	263.132	3332.94	2055.55	3357.32	1036.76	660.584	734.237	138.037	1583.25	367.005	244.726	9.5853	-19.0172
Endo-2	8878	3492	5154	0	37985.1	69.7232	16.0395	2.9435	825.74	35.8588	407	135.35	15463.8	1076.72	64.4294	955.582	379.441	39.5593	1528.21	732.78	1411.45	1179.79	1648.37	245.475	64.0904	203.774	294.695	92.7684	10.0662	-13.2775
Endo-2	8887	3491	2879	0	20735.2	75.5181	2.65663	3.72892	3311.11	154.211	1080.02	269.187	7845.65	1309	87.2349	117.717	391.855	5.63855	2345.46	568.133	4203.95	875.633	1756.74	1674.26	237.289	492.133	933.247	308	6.65151	-12.5234
Endo-2	8908	3500.5	3146.5	0	28227	97.1418	43.7761	77.3657	2134.49	199.582	121.799	167.672	6525.63	1015.65	113.866	248.455	265.045	116.754	1050.77	994.925	1704.25	1025.67	4622.4	901.858	139.575	1150.78	354.351	96.4478	6.16403	-15.2038
Endo-2	8920	3500.5	4092	0	19271.4	67.3939	90.3939	88.8636	3933.48	142.023	5160.28	128.106	10521.7	1377.08	93.4545	1039.06	1026.13	132.924	4103.01	1379.16	3059.23	1733.54	1064.92	1349.59	156.371	438.5	1178.93	69.8636	1.77387	-14.5276
Endo-2	8932	3505.5	5032.5	0	29631.8	63.3089	24.6748	31.7317	1146.18	110.065	144.049	129.35	12128.5	1324.8	95.5447	1214.02	692.35	101.537	2370.36	1507.42	1227.7	1370.48	5507.74	1131.08	151.48	612.764	760.13	82.0569	6.01326	-15.6038
Endo-2	8937	3506.5	4108	0	17203.3	80.3697	58.8182	62.8545	5430.37	229.933	3519.59	215.242	10295.7	1177.27	70.1394	944.582	822.6	72.6424	3742.07	905.782	2279.98	2115.13	526.067	1158.75	196.115	464.279	1125.68	123.145	0.364663	-12.2637
Endo-2	8985	3514.5	8421	0	30269.5	84.0909	64.9545	8.51515	2369.11	136.409	1525.8	183.424	10803.4	1826.3	147.318	211.652	18274	11.803	4941.26	1142.33	2762.89	1056.18	91.8636	1063.3	195.424	164.606	28403.8	108.848	12.0953	-9.40353
Endo-2	9049	3542	3602	0	43120.1	81.181	134.333	111.833	3398.01	194.438	6458.79	170.995	13648.6	1324.41	140.543	1042.24	633.181	163.276	3857.77	1601.11	2366.97	2235.75	2171.97	904.833	186.21	5352.47	1283.4	535.029	7.62153	-19.0425
Endo-2	9052	3533	5198	0	15113	84.7059	5.66667	0.00980392	1698.66	59.0686	2902.24	74.0392	3457.46	1452.25	45.8627	126.392	1005.98	24.4804	2989.48	421.549	2297.74	328.755	310.324	327.774	49.6275	142.971	1077.39	76.9412	0.72395	-9.77626
Endo-2	9071	3534	10688.5	0	17635.1	135.047	9.84375	77.75	1701.03	231.391	10189.3	268.75	12368	1201.34	59.5156	255.344	317.781	72.9062	1767.8	807.219	1078.17	1291.5	934.875	385.484	30.9844	45.125	84.7344	2462.95	-0.661856	-16.6162
Endo-2	9100	3552	10049.5	0	15163.1	133.813	66.7251	11.9474	1561.15	151.292	5620.12	150.725	13833.4	1888.85	98.3392	510.503	945.86	162.444	3508.88	853.83	3154.54	1831.56	960.439	578.292	83.1871	49.2632	710.573	3964.52	0.593051	-14.8021
Endo-2	9113	3551	10933.5	0	24555.2	97.4525	177.419	363.464	1502.03	144.788	1141.96	117.045	9168.08	2196.97	121.413	333.709	709.447	186.542	1493.92	649.43	2992.82	944.246	792.821	434.039	78.8547	237.57	224.777	188.654	4.87491	-12.7623
Endo-2	9115	3553.5	5062	0	16286.3	69.0164	18.1844	10.0656	3698.45	91.9467	3201.76	179.238	21440.9	1609	79.6434	1398.98	1007.99	73.5943	2313.22	1333.45	2040.57	2077.69	841.811	715.258	73.8688	1047.16	756.824	117.41	0.668598	-12.2644
Endo-2	9143	3567.5	3813	0	19734.4	49.5681	55.0939	62.3005	1321.01	195.441	5124.95	167.094	12734.5	774.803	86.2113	974.695	152.385	64.6855	1421.32	784.301	745.84	1764.23	1588.85	474.211	169.643	446.775	611.315	96.8732	0.0236838	-13.5404
Endo-2	9174	3563	3587	0	16945.2	71.7292	12.1562	16.8229	2688.32	115.021	3825.34	173.635	7235.03	1762.79	185.312	256.458	874.229	49.7812	3334.09	646.948	1989.82	1780.86	2998.53	991.354	175.844	1234.33	1520.79	268.885	2.20106	-12.8901
Endo-2	9177	3572	10414	0	45172.3	141.802	127.036	283.172	2471.76	205.854	1102.59	219.432	4062.28	2081.12	124.771	322.938	1136.06	297.932	3703.94	1344.81	3182.78	849.906	1987.04	1167.77	133.792	78.8854	434.583	452.193	9.56507	-17.214
Endo-2	9225	3583.5	8109.5	0	18571.5	89.9219	19.7396	0	1299.96	36.1562	4.04167	158.344	6624.79	2160.32	155.484	160.266	2437.62	23.8385	2813.07	567.167	2535.91	585.953	636.667	971.932	104.99	435.005	6825.63	83.1979	4.40603	-12.3929
Endo-2	9248	3593	8038.5	0	17934.2	80.8809	189.149	58.5119	6670.82	122.369	462.857	111.536	7001.05	1638.36	128.47	430.607	1147.21	79.0536	3177.45	1312.45	3620.83	1466.11	1559.22	720.292	137.655	132.75	653.405	150.899	6.21651	-12.5915
Endo-2	9255	3591	10398.5	0	37482.8	72.6981	81.8428	122.075	1456.07	51.5912	759.038	86.1195	3013.51	1913.26	93.9434	244.044	988.428	213.138	2693.99	910.333	2083.25	628.641	2120.65	721.95	59.4277	50.5912	465.44	546.994	8.90005	-15.1161
Endo-2	9257	3588	3780.5	0	36705.6	48.6429	18.0833	0.619048	4054.15	95.4881	1610.2	69.2857	16308.8	1052.49	74.7857	297.548	20186.7	9.98809	8990.52	2807.64	1991.82	1438.76	346.881	125.845	127.833	2620.7	24674.4	42.8333	10.9529	-10.4445
Endo-2	9266	3598	8149.5	0	45550.2	114.682	109.609	35.3542	2116.99	155.323	5965.03	230.839	9263.63	2055.36	112.557	655.167	1335.9	180.958	3989.91	2710.9	2779.28	1747.75	1283.26	1000.66	133.979	140.62	487.516	1591.45	8.27931	-18.8984
Endo-2	9284	3605	3843	0	20567.9	68.9237	30.5169	44.2246	2476.58	150.165	3436.58	102.483	13881.4	1234.57	77.8093	715.356	949.191	23.2542	4014.81	1377.97	2750.83	1345.76	2174.17	477.53	109.216	1554.05	1801.76	134.373	3.71589	-14.187
Endo-2	9297	3598	5097.5	0	38922.8	116.203	2.33333	4.66667	851.159	72.2174	81.1884	128.188	28485.3	1470.06	159	1648.97	821.522	131.348	1890.49	437.029	1961.83	1556.68	346.275	590.087	208.116	473.101	1087.99	66.2609	10.5408	-13.7513
Endo-2	9311	3600	5102.5	0	32631	70.2778	40.4444	0.527778	458.806	61.5694	67.8889	119.139	26887.7	1605.12	151.597	1363.85	1011.29	69.5417	1329.26	907.847	1571.04	1534.24	235.292	410.819	122.75	292	969.653	85.125	9.83513	-12.5754
Endo-2	9335	3610.5	8111.5	0	30131.9	204.503	453.358	334.006	2546.11	73.7358	804.83	439.126	4511.13	4339.28	383.981	1126.13	3360.04	517.648	4842.67	1202.65	5250.36	602.566	2156.51	2701.34	340.264	563.258	574.66	204.296	-0.984921	-3.18779
Endo-2	9401	3631	4774.5	0	19404	72.7577	59.5198	13.4537	2521.37	85.8458	2686.2	100.093	13405.3	1015.95	67.6608	842.128	8657.18	51.9339	3915.23	1630.79	2217.7	1899.18	2616.22	268.339	84.1189	1055.96	619.15	85.1322	1.99743	-12.5429
Endo-2	9410	3634	10359.5	0	50566.6	122.889	218.291	210.206	1677.68	168.011	1335.97	142.439	6166.31	1624.36	103.656	458.661	632.794	235.45	3605.29	1474.15	2737.14	904.148	2991.46	318.296	67.9894	420.196	436.492	494.577	9.5959	-17.235
Endo-2	9438	3637	10345	0	53673.3	151.783	96.6643	312.182	1612.35	125.58	1636.01	99.5524	11014.6	1884.02	79.2448	473.846	799.517	250.245	3912.46	1660.36	3100.54	1461.99	2301.15	355.993	61.6993	757.902	308.888	3349.03	9.52472	-18.0075
Endo-2	9445	3633.5	10046.5	0	14161	83.6812	25.3188	183.304	3201.22	254.449	3550.86	318.768	17817.6	1265.57	132.667	452.029	1811.49	82.4058	2579.97	417.232	2279.83	1631.09	569	1583.86	207.986	138.391	5335.23	351.116	0.13327	-12.0708
Endo-2	9455	3651.5	4176	0	47003.2	95.4407	36.9926	36.6481	1104.44	82.7815	6891.81	79.4667	11901.1	1105.91	51.1556	1178.99	658.089	120.607	2509.78	1399.41	3390.74	1899.62	1540.26	189.644	92.1778	597.293	1017.31	218.122	7.38582	-19.7233
Endo-2	9469	3641	10329	0	43176.4	75.9825	81.5263	469.746	1223.46	106.816	2252.96	93.6667	4939.03	1243.75	40.1667	223.728	521.412	154.175	2068.01	1075.94	2311	978.289	1538.1	267.184	63.9474	1140.75	168.491	4358.51	9.22573	-17.3024
Endo-2	9481	3647.5	10757	0	1124.9	65.9206	6.04762	261.865	1961.94	203.063	10375.8	122.357	5412.98	1401.8	109.206	3.87302	518.476	17.0238	1431.11	2633.45	1493.75	1453.71	1152.3	665.183	118.349	2222.94	337.548	3150.97	-2.24701	-16.1866
Endo-2	9486	3649.5	6773	0	27175.4	86.8	73.88	241.373	1785.11	173.667	5302.98	179.333	11585.6	1509.99	64.7867	1015.91	810.44	241.253	3310.83	2157.71	3030.72	1929.13	1439.63	1106.31	140.12	265.447	512.227	2291.44	2.6125	-15.4871
Endo-2	9545	3663.5	10290	0	38448.1	53.2229	161.863	316.88	1205.61	87.9371	1782.6	165.669	11109.7	1171.07	65.0457	374.971	443.36	154.377	2468.53	1166.9	1675.35	908.543	1902.37	790.383	104.44	768.76	99.5257	1734.42	9.66662	-14.1825
Endo-2	9617	3691	5832.5	0	28677	81.3798	187.564	165.693	4560.64	131.53	4082.32	118.746	5992.68	1726.57	120.519	748.171	958.92	223.125	3756.8	1276.45	2348.19	2726.02	1839.17	857.575	153.645	359.568	877.185	109.927	3.80166	-14.8886
Endo-2	9624	3684.5	11593	0	21964.8	61.1471	64.5177	122	839.259	94.9118	3130.59	50.8588	4024.42	388.371	16.4353	130.676	231.6	194.876	1322.9	325.218	0	368.835	1521.66	174.994	53.4412	189.671	679.929	144.359	8.02066	-7.72775
Endo-2	9628	3688	7463	0	47917.6	79.7512	115.821	58.0995	2298.93	145.219	4915.83	89.0398	13138.6	1443.03	123.786	934.413	752.378	336.328	2751.44	1394.54	1736	1501.16	679.234	587.298	179.458	304.015	631.154	1830.8	7.71126	-18.7362
Endo-2	9640	3688.5	11629.5	0	22427.9	69.3626	127.526	361.795	909.117	92.4094	3051.02	48.076	5407.94	423.737	42.6023	216.643	220.386	181.287	911.936	327.398	0	466.673	1489.99	327.532	70.5205	131.421	233.965	111.088	8.02548	-7.74808
Endo-2	9641	3689.5	5518	0	23440.2	89.3101	37.6744	34.4264	2860.06	87.6047	7467.91	169.76	13269.4	1250.19	82	867.023	154.295	159.628	1892.97	1736.4	1336.16	1318.25	2221.19	543.868	108.132	148.419	100.403	71.4884	1.29438	-15.7152
Endo-2	9642	3687	6767.5	0	36375.8	66.9767	0.100775	74.3721	834.853	91.6202	1920.64	102.512	14321.8	1050.59	49.6589	880.171	517.946	154.721	2134.29	913.791	1166.88	2499.74	914.581	742.76	178.55	365.124	525.829	1080.98	10.5322	-13.3891
Endo-2	9673	3696.5	11334.5	0	40126.2	69.5128	33.7077	16.9795	1036.48	55.9641	3116.06	93.4821	3823.34	607.313	38.7846	112.456	420.938	133.923	1602.25	742.744	0	206.338	985.579	215.836	39.9385	208.113	406.056	705.62	10.6836	-12.6642
Endo-2	9676	3696	11311	0	18871.1	40.6268	15.5634	50.0775	1264.25	76.169	3668.92	37.7887	5922.44	317.028	10.8521	88.1268	230.725	52.0634	871.042	326.289	0	338.662	526.887	25.9577	14.5845	74.6056	1363.25	1128.46	7.97383	-7.53423
Endo-2	9677	3696.5	11604	0	33755.3	89.1856	240.647	548.796	2202.66	174.772	4123.88	45.2635	4293.47	758.389	37.8503	372.946	401.641	344.659	1641.41	296.629	0.359281	508.653	2005.84	342.814	43.1497	144.407	417.353	100.922	10.5602	-12.5217
Endo-2	9699	3700	3652.5	0	29612.5	45.4861	0.0694445	0	738.819	179.653	0	144.278	17602.6	598.708	56.8889	170.319	138.25	2.29167	786.028	538.486	2198.19	1281.24	61.8889	346.778	198.583	450.347	650.972	126.764	9.38629	-10.3251
Endo-2	9702	3706.5	7069.5	0	51462.4	89.4227	162.144	10.9485	2033.46	131.098	3158.77	126.974	11597.9	1810.86	130.799	1013.14	350.139	251.438	3973.93	1641.06	3769.88	1877.89	1509.3	577.113	157.887	128.897	242.979	206.753	9.86017	-17.7246
Endo-2	9732	3718	7679.5	0	32023.6	62.8564	57.6205	67.8821	1366.7	192.677	1087.74	132.451	33819.3	1100.22	160.856	1322.02	745.221	333.277	2116.01	781.569	2023.81	2193.77	397.851	402.113	119.164	3471.97	689.185	126.79	10.4601	-12.8911
Endo-2	9737	3711	7055	0	26640.9	107.985	127.085	44.5231	3141.57	198.362	1909.28	138.231	11281.2	1313.6	128.246	691.008	8849.18	152	2239.43	840.123	2857.73	1158.66	1102.68	919.615	137.746	81.7308	2877.27	130.262	8.13092	-12.4567
Endo-2	9753	3724.5	9643	0	40909.7	137.563	181.943	131.707	1103.52	78.0456	3496.19	80	12625.7	2033.91	126.973	631.806	951.456	417.011	3979.64	1004.06	3488.72	1394.7	905.589	461.373	62.8707	890.829	639.414	175.262	9.13994	-17.1627
Endo-2	9757	3732.5	4463	0	18476.3	103.481	52.0078	36.8527	902.457	103.256	12104.9	84.5892	6685.57	1296.14	47.9884	640.81	720.438	119.442	3098.49	2559.17	1403.5	2603.32	1390.32	313.911	72.3915	189.581	675.194	2949.11	-0.541137	-17.1231
Endo-2	9770	3735.5	8128.5	0	22481.3	92.5444	206.359	95.1197	1792.58	112.135	11025.2	135.05	15117.3	1751.49	100.799	1214.98	1062.55	299.942	2896.26	842.985	2058.38	1432.62	757.096	896.046	120.054	103.649	352.348	3469.88	0.526363	-17.0109
Endo-2	9771	3727.5	8635	0	14825.1	72.6131	128.149	105.619	4950.72	267.792	2013.11	181.952	9909.01	2081.69	96.6845	1001.04	4666.27	215.208	1898.79	992.071	2997.3	976.274	2360.74	958.387	109.917	370.304	176.524	135.75	4.27284	-13.0802
Endo-2	9782	3730.5	5443.5	0	12851.7	113.354	13.5556	0	6202.86	111.417	656.306	185.75	11090.1	1831.53	395.674	329.382	1771.15	8.09722	4492.54	2039.96	3305.09	1581.49	1683.41	579.243	99.5694	191.5	15193.3	114.944	-0.66537	-5.83508
Endo-2	9796	3738.5	3064	0	27538.8	52.2353	224.799	129.27	5332.42	237.52	414.701	246.789	4700.85	1552.27	117.765	532.078	876.319	186.422	3499.02	1241.25	2653.94	992.412	2741.16	1299.24	236.348	418.632	1094.81	96.4853	6.82189	-13.9429
Endo-2	9797	3730	7086.5	0	21864.1	89.75	376.602	180.491	5595.91	297.935	6591.5	294.787	19097.1	2141.52	168.463	1394.03	1748.82	438.833	3976.6	1767.29	2441.38	2287.54	1303.44	2226.58	232.63	179.324	721.352	583.324	2.05125	-15.6181
Endo-2	9813	3737.5	4539.5	0	26387	100.147	127.52	62.2667	576.867	57.1467	258.727	77.48	4917.38	845.167	45.7733	474.873	575.76	80.7733	1492.53	521.813	3390.89	1225.08	1027.9	251.467	76.0867	1361.62	669.627	99.2333	8.47524	-11.8618
Endo-2	9818	3742.5	5467	0	19830.6	53.9919	24.2794	39.1296	2751.93	94.4575	893.478	117.247	5255.26	1494.94	60.7409	535.862	519.138	165.271	2006.23	1336.85	2808.71	1408.78	3287.51	469.579	111.964	199.146	399.291	75.3603	5.7425	-14.0588
Endo-2	9820	3744.5	7073	0	18307.9	90.68	241.773	74.24	3140.11	160.591	8658.19	132.071	11705.6	1640.78	127.884	943.107	958.293	243.96	3879.42	1165.69	3487.25	2087.1	1271.28	721.164	160.787	128.907	607.849	406.916	1.22918	-15.7462
Endo-2	9834	3742	7125	0	16345.2	92.2231	191.208	121.131	4665.42	160.785	3038.92	109.569	8375.42	1559.87	159.762	655.923	855.054	283.854	2547.62	807	2626.42	453.662	2149.02	555.738	157.923	111.192	584.023	140.377	2.55345	-12.3014
Endo-2	9857	3748	9123.5	0	37441.3	102.683	69.6403	58.1007	676.144	49.0432	3209.18	43.9137	12692.3	1183.55	72.0648	615.676	791.727	367.223	2867.99	558.568	2027.68	1218.22	602.41	314.496	53.5683	3638.99	720.597	100.698	10.4105	-14.3945
Endo-2	9898	3762	9114	0	56284.9	107.011	120.58	101.702	2611.14	109.585	2426.1	80.5053	12709	1614.8	124.431	835.612	915.952	587.128	3760.3	841.202	2741.25	1364.67	1014.47	659.702	63.1649	5688.1	730.543	156.851	10.8783	-16.9183
Endo-2	9906	3771.5	10401.5	0	38219.3	136.243	143.766	197.34	2766.23	223.036	4584.94	186.899	11700.1	2202.73	111.512	281.287	869.719	187.669	3616.83	1077.8	3597.16	1528.35	1129.89	1102.11	133.293	144.538	673.855	2705.82	8.46647	-17.7133
Endo-2	9907	3759.5	10424	0	18560.9	190.469	93.2124	136.575	3192.58	300.372	3128.27	325.398	11297.7	2871.86	228.726	160.911	1380.37	109.814	3329.94	1473.59	3473.88	6018.67	1344.59	1601.1	364.584	1233.65	8731.2	1477.97	2.7946	-14.067
Endo-2	9910	3769.5	5824.5	0	17148.6	87.1533	4.23345	0.414634	4508.3	169.359	1749.14	168.568	14476.6	1691.97	113.676	655.746	3087.51	7.31359	4294.6	1714.97	3264.51	2557.62	2461.94	849.892	209.606	324.878	7746.79	110.181	5.05765	-13.8502
Endo-2	9911	3758.5	7519	0	34417.7	68.3524	204.048	238.019	2700.46	130.6	4302.76	149.257	18323	1828.54	120.895	1023.06	841.724	365.848	2197.02	1137	1837.7	2511.07	1838.23	874.219	126.971	182.695	317.819	157.029	7.29338	-17.0158
Endo-2	9921	3763.5	10943	0	20867.6	112.333	0.2	0.219048	1072.69	53.4	3695.01	68.7238	18797.2	1418.6	105.333	77.8857	302.143	5.67619	2261.28	757.905	2589.53	807.095	759.057	255.381	36.419	163.971	812.61	2635.39	2.05924	-14.2832
Endo-2	9923	3765.5	7671.5	0	24762.9	64.0303	42.0455	15.9394	3407.04	141.553	3994.17	138.159	23970.1	1021.44	110.144	826.273	687.803	131.924	2864.21	1679.02	1781.21	2210.26	874.295	598.629	193.333	1397.98	1004.2	36.7197	3.38496	-14.906
Endo-2	9945	3775.5	4242.5	0	38140.1	61.5084	48.5028	37.6648	758.832	79.7151	7732.21	53.6816	6551.92	1063.13	52.1732	505.687	631.922	82.4357	2396.46	1222.59	1477.43	1354.28	2276.31	348.743	61.838	137.006	574.804	495.363	6.68216	-18.3874
Endo-2	9950	3774.5	3084.5	0	19102.9	60.9489	51.3066	82.8905	3049.03	320.781	1034.66	252.182	14538	1176.52	106.818	849.416	1003.54	233.19	3284.78	1108.87	2600.77	999.124	2803.09	1973.92	309.27	290.204	1585.31	94.4234	5.73409	-13.1117
Endo-2	9992	3787.5	4225.5	0	31980.4	70.049	63.8627	34.9608	2272.75	72.2647	6627.84	69.1863	7796.16	1147.58	48	777.471	597.353	130.583	2651.72	1098.91	2606.36	1591.44	1791.05	205.853	65.0686	95.3774	701.127	94.0196	3.38549	-16.0309
Endo-2	9996	3791	3492	0	32462.4	89.4493	45.2077	47.0193	2786.13	82.4783	466.415	97.1208	8433.23	1065.21	66.9565	677.884	610.56	39.5072	1671.75	611.391	1668.66	785.966	925.174	286.565	166.28	333.217	899.807	82.0773	9.82004	-12.3734
Endo-2	10001	3801	3754	0	24211.9	87.8979	0.159159	1.22222	2544.17	222.937	1248.58	199.093	24303.6	1147.39	133.363	981.351	582.913	5.90991	2907.08	1111.02	2182.98	1953.43	1522.49	721.505	153.709	2464.89	1102.32	218.544	8.28499	-11.2911
Endo-2	10003	3797.5	4709.5	0	22463.8	90.3733	71.9178	22.3733	4419.96	107.819	2595.3	102.664	14744	1720.74	85.6815	1208.43	1028.78	138.969	3811.84	1757.26	2777.93	2768.05	2419.46	317.315	101.065	194.675	1155.23	119.64	5.09353	-14.0137
Endo-2	10017	3795	3785	0	49309.9	117.951	15.6256	170.512	4414.75	257.03	1159.48	177.399	17595.2	1593.45	164.566	978.793	883.724	61.9901	3637.5	2484.18	2836.53	1337.46	1341.62	753.049	151.158	3373.47	1138.76	131.153	10.5629	-16.7994
Endo-2	10068	3804	4556.5	0	17291.4	69.871	97.9919	75.9597	2675.08	120.968	3735	93.121	7530.29	1273	41.9113	557.46	1026.36	75.1855	3405.59	1762.01	2177.83	2209.65	7109.45	424.629	77.5887	353.669	641.064	1001.49	-9.25711	-18.7738
Endo-2	10074	3813	3716.5	0	22236.5	97.7308	0.747863	0.615385	3919.16	152.812	3273.12	132.321	27968.1	1324	155.97	1048.44	337.517	8.48718	3047.41	1175.39	2270.39	2094.83	1046.38	376.201	175.97	1020.96	1141.57	278.816	3.35902	-14.3244
Endo-2	10086	3807.5	4543.5	0	13047.6	95.8495	56.6882	145.183	2996.42	92.3979	4451.41	89.3118	11050.9	1077.44	26.6559	660.957	617.505	115.989	4299.19	2161.8	1543.69	1908.83	6830.72	165.71	103.366	146.398	867.194	2843.72	-9.40583	-18.7895
Endo-2	10106	3815.5	3478	0	25076.1	50.7803	27.8182	20.1818	6090.82	363.197	739.455	257.939	20451.1	1182.58	122.538	1378.54	466.576	130.144	4150.26	1219.38	3134.27	1642.53	2327.55	1538.27	250.848	648.447	988.773	137.205	6.83068	-13.3277
Endo-2	10107	3815.5	4316	0	46559.8	73.8788	116.992	41.3864	6444.37	72.8333	1279.12	69.5379	47770.5	1661.04	57.1439	8720.32	787.341	1825.03	4231.52	953.288	7830.95	2471.98	2869.73	415.803	101.083	214.879	878.742	75.3864	9.88613	-18.9126
Endo-2	10142	3820	7674.5	0	13325.5	90.8187	10.2632	0	3050.36	168.561	2118.51	92.5263	17644.1	2011.37	219.62	51.0877	25314.6	0	9142.22	2207.53	2695.49	1924.6	811.105	756.298	182.123	413.994	33259.9	4394.64	1.04967	5.10228
Endo-2	10208	3831.5	10378.5	0	51684.6	157.833	198.75	292.869	1372.17	170.988	2771.26	169.536	18351.8	1596.23	103.083	953.333	615.214	595.786	3938.56	1299.33	3116.3	1608.77	1267.08	254.083	118.75	125.286	449.75	1053.74	9.99176	-17.3457
Endo-2	10231	3842.5	10377.5	0	50967.8	148.109	344.526	356.686	2019.23	174.453	5058.53	151.321	20665.5	2282.9	129.474	1039.34	1034.96	638.861	5257.15	1421.78	3843.72	1740.87	1735.91	725.949	97.5401	153.401	613.686	788.526	9.13521	-19.0086
Endo-2	10248	3844.5	8742	0	26550.8	132.256	129.591	795.364	1996.12	241.307	9234.43	170.04	11977.4	1398.26	125.011	898.92	301.812	128.767	2777.4	5220.99	2087.18	1805.64	946.699	580.676	122.335	1394.01	482.722	3198.53	1.40023	-16.9796
Endo-2	10267	3851.5	6290	0	21261.3	53.5714	108.19	82.034	6583.51	144.633	18.1905	162.816	6753.01	1011.93	90.3197	283.224	4425.35	4.38776	3654.46	1100.54	3217.08	701.442	1272.24	599.762	93.1701	81.0068	3796.18	88.4286	7.18662	-11.6643
Endo-2	10275	3853	8757.5	0	20967	150.526	322.022	145.793	573.452	64.3852	9560.43	90.3778	11167	2046.53	119.57	1133.69	1277.62	200.978	2989.47	1099.21	2443.03	1783.36	1053.78	660.97	84.3555	1088.03	773.141	4285.78	0.825633	-17.1205
Endo-2	10277	3848.5	10385	0	40040.9	137.148	89.6721	64.6066	1821.16	128.213	3469.38	146.459	20248.4	3246.28	224.328	730.18	1558.93	330.984	5899.44	1369.03	4686.2	1342.66	1506.67	1631.1	259.639	318.475	1077.8	598.902	9.54422	-19.094
Endo-2	10282	3856.5	10913.5	0	32515.2	108.739	0.426752	0.0382166	1181.99	153.975	32.8917	144.242	10066.5	1159.73	84.9682	0.541401	436.051	0.796178	2313.26	435.306	1958.26	1072.62	616.376	764.439	109.045	26.3503	401.79	1890.92	10.0628	-12.4968
Endo-2	10302	3862.5	10927.5	0	54854.2	106.738	430.268	1035.3	2784.52	223.836	2018.94	192.148	15036	2624.96	149.366	1108.25	1354.03	877.038	3877.23	1090.28	2721.38	1322.46	2012.57	1476.67	159.022	1105.64	769.667	739.213	9.56727	-18.6435
Endo-2	10326	3865	9103.5	0	35012.8	128.49	64.8344	101.389	2065.36	202.777	1728.5	144.408	9421.55	1444.34	82.0573	533.465	1065.46	124.166	3035.26	1675.18	3373.71	1872.07	950.293	480.146	69.2484	148.287	636.325	123.892	9.71688	-15
Endo-2	10372	3873.5	9097.5	0	38492.3	86.813	96.4553	239.764	1270.33	99.5203	2837.25	82.9431	11286.1	2033.7	136.642	760.341	1671.49	297.073	4189.87	1432.24	4151.02	2087.68	1152.95	592.61	102.862	203.122	787.382	282.398	9.18756	-17.1742
Endo-2	10396	3878	4253.5	0	50715.4	77.3333	50.0556	324.361	6086.31	118.204	5079.46	144.269	10306.2	1647.59	60.5556	892.065	1181.72	95.2407	5259.31	1812.31	4864.34	1953.17	2994.98	381.389	78.0556	605.741	1665.99	131.12	9.01724	-18.7028
Endo-2	10466	3899.5	5446	0	24873.2	77.0341	119.449	13.4585	2219.23	52.4683	3540.78	60.9512	14737.3	759.863	49.6	1364.68	783.995	72.2195	3952.89	2597.77	5021.1	1805.34	3909.62	232.883	49.9317	743.468	717.059	104.649	5.92591	-14.6828
Endo-2	10498	3905.5	4238.5	0	39128.8	73.3936	52.4521	468.037	5773.2	77.6489	4469.81	80.4202	17277.1	1691.28	52.7394	1675.46	532.926	152.745	4961.91	1089.81	3596.28	1436.8	2031.8	323.452	71.9255	563.771	746.872	79.9255	8.72245	-17.388
Endo-2	10504	3904	10891.5	0	22317.9	173.271	76.1626	457.602	1993.23	187.669	3067.19	210.789	21673.6	2340.04	135.542	362.765	1286.11	201.289	2757.66	898.44	2266.25	1234.14	2243.69	1215.89	148.566	531.681	797.446	6375.58	3.01282	-17.7435
Endo-2	10536	3909	4049	0	50546.3	84.9141	94.3438	139.555	7025.25	210.172	465.969	224.969	11438.3	1386.56	54.6016	777.797	1302.76	62.6016	2567.23	1097.95	1786.36	1599.78	2954.05	1229.17	98.1406	155.164	1018.62	142.852	9.80726	-16.2513
Endo-2	10543	3920	3156	0	33866	58.8875	45.2875	52.4667	2786.03	208.275	584.429	197.4	17616.8	1157.03	90.9417	765.196	3391.57	71.6708	2888.38	1190.99	2806.48	1658.8	3456.18	1333.17	251.625	795.754	9400.56	85.2375	7.07923	-14.991
Endo-2	10546	3914.5	3111.5	0	40745.4	73.1071	27.9464	67.9702	4442.48	198.482	1202.45	281.673	7796.18	1193.03	94.6131	114.155	357.488	40.8512	2344.38	707.131	2275.3	907.268	2359.74	1375.14	225.185	571.155	1216.57	134.97	9.91929	-15.3914
Endo-2	10565	3915.5	6625.5	0	53212	73.4248	29.5221	74.2301	1690.25	218.478	456.389	184.947	29873	1117.99	54.9115	2169.24	683.681	389.46	3325.42	2490.73	5136.97	2051.25	2063.52	463.611	157.274	2370.34	335.442	111.69	10.3366	-17.5769
Endo-2	10566	3913.5	10462	0	33856.4	35.7467	24.68	161.573	1551.48	193.373	2869.79	163.96	3574.73	973.16	50.6533	117.893	233.4	172.253	2036.41	626.613	1231.57	548.027	2224.96	339.987	45.4133	100.76	346.427	88.8933	8.89493	-12.8619
Endo-2	10570	3924.5	4052	0	48285.2	63.7749	14.5969	9.58115	1911.29	97.712	196.45	71.0105	2564.07	1000.58	41.4031	142.901	922.848	33.9843	5445.06	3259.02	2742.07	698.351	2455.02	448.173	89.7801	136.319	1102.83	138.141	10.0992	-16.2409
Endo-2	10609	3923	6639.5	0	49875.8	56.517	39.1429	101.34	2517.49	116.374	2217.14	113.544	28284.2	1600.52	51.9252	1874.61	780.789	241.197	2541.89	1311.48	3774.82	930.483	1528.45	567.959	112.66	1420.2	375.993	452.347	10.1585	-17.2787
Endo-2	10613	3930	9057	0	13769.4	116.852	154.335	61.2102	3715.5	137.943	12673.1	222.989	8190.14	3002.57	156.17	1279.84	2056.98	212.972	3687.46	1339.36	2296.49	1934.59	2382.35	1617.65	153.909	80.858	243.818	632.716	0.154376	-16.4442
Endo-2	10622	3929	3128.5	0	24718.2	84.3448	219.471	283.098	3318.74	323.707	1066.79	459.914	6181.47	1437.48	124.753	450.408	995.598	326.822	2201.57	442.356	1814.72	709.132	2487.17	2260.05	372.908	266.862	623.73	130.075	6.37579	-13.2525
Endo-2	10637	3939.5	6125	0	25347.4	87.1205	19.6185	15.5181	1814.5	125.024	4145.57	160.133	14203.8	1102.29	85.1486	1264.98	705.329	98.4418	2499.22	663.904	1471.88	1648.21	728.863	484.345	131.1	82.6988	634.177	321.888	3.2171	-15.0272
Endo-2	10652	3942.5	4060.5	0	57186.6	85.7897	62.6359	24.3795	2015.16	115.174	43.0718	89.3179	4627.7	1311.81	68.4564	422.6	1101.78	59.0462	5366.66	2507.51	2731.66	1342.62	2416.32	625.836	91	94.5128	1134.55	99.0513	10.1425	-16.7374
Endo-2	10667	3941	6160.5	0	35801.7	89.0057	9.54237	13.9605	3114.15	180.305	2375.31	115.424	12379	984.627	73.2881	1043.52	529.994	59.2655	5445.14	1138.41	3023.32	2248.07	1113.86	518.876	124.362	115.068	921.797	236.412	10.4146	-14.7148
Endo-2	10674	3942.5	4302	0	25180.9	48.2516	115.057	70.5535	2603.36	178.075	310.673	188.327	8210.87	1451.38	74.4906	682.415	1120.67	159.61	2739.52	1188.26	1885.08	1032.78	4564.23	947.277	155.038	301.893	942.346	103.421	6.01528	-15.1096
Endo-2	10690	3942.5	3331	0	20874.5	88.1288	1.49242	4.97727	1745.39	327.939	2873.58	246.538	40270.3	1320.33	100.576	971.417	303.947	11.0379	3241.73	1220.86	2827.57	2047.99	2074.08	770.644	226.644	322.606	1505.2	180.167	4.62735	-13.8449
Endo-2	10696	3951.5	4035	0	54617.8	58.7839	36.201	7.76884	1497.84	98.4422	13.6583	81.603	7083.31	1053.04	56.4322	250.839	774.427	61.3769	4180.87	2628.68	2415.73	949.02	2374.7	331.291	103.131	215.975	1308.89	89.2412	10.1609	-16.4137
Endo-2	10698	3947.5	3170.5	0	19544.4	84.5198	45.0446	129.812	3444.46	192.01	337.02	175.743	13612	1147.83	136.054	583.46	2836.61	68.3515	1749.2	583.361	1810.14	574.762	3043.71	1019.66	205.827	776.262	6673.99	60.4752	5.31937	-12.3904
Endo-2	10712	3954.5	6068	0	38597.9	58.6623	4.34649	7.4693	3448.3	90.4561	9.38158	114.053	7078.31	1316.29	90.1579	474.544	1619.52	19.6447	4139.19	923.553	2725.27	971.557	1403.68	605.456	154.206	89.2763	5605.14	89.1974	10.1018	-14.6356
Endo-2	10726	3963	10219	0	54833.7	148.148	129.73	223.861	2914.76	201.992	799.768	197.882	19937.8	2340.79	130.131	795.072	1342	837.354	6554.97	2110.76	3369.06	1139.23	4381.16	1251.28	110.768	296.894	482.679	3223.31	9.11466	-18.2317
Endo-2	10742	3961.5	10921	0	47334.9	165.527	305.549	1874.93	2498.68	322.357	5274.26	297.918	5459.15	2562.97	167.22	561.39	1531.12	402.78	2708.28	1210.2	2308.21	1696.35	2430.68	1288.16	141.775	445.945	730.868	118.978	9.44184	-19.1906
Endo-2	10743	3955	3016	0	22249.2	36.2889	0.0555556	0.0777778	1571.38	71.2889	3929.57	121.6	17229.2	1232	44.8111	531.5	418.511	19.3778	1736.17	1355.12	3347.98	2223.76	4413.29	149.056	76.0889	236.233	50.3111	56.8889	5.72404	-15.0716
Endo-2	10758	3958	9058	0	23864.8	95.9778	34.6667	547.244	795.544	204.456	12122.8	149.189	8783.85	1103.33	80.1445	697.178	1005.19	64.4889	2489.6	803.4	1159.74	1410.67	686.267	728.867	88.2667	908.267	620.167	3186.98	-0.408301	-17.0926
Endo-2	10784	3970.5	5401	0	31547	73.5085	8.59322	1.07345	502.91	65.9492	5348.57	86.6102	7757.36	829.062	57.3051	466.853	1778.53	5.43503	2039.53	733.763	1349.23	888.164	1215.42	247.034	79.1412	338.712	2595.51	64.4633	3.57241	-15.8229
Endo-2	10787	3965.5	10573.5	0	53787.6	111.716	91.8899	85.633	1326.91	129.615	642.147	162.45	11046	1882.87	109.404	364.413	1123.28	222.817	3335.76	2383.82	2637.74	660.239	2067.36	847.303	73.0642	116.881	448.156	3568	9.55077	-17.9285
Endo-2	10793	3967	9054.5	0	14615.4	93.4722	64.1111	326.676	589.352	82.6667	11030.2	52.8981	14472.7	1064.68	55.0833	748.204	689.889	95.0185	2133.32	634.657	1548.31	2164.25	506.213	303.028	48.463	466.028	743.296	2500.28	-0.945932	-16.7367
Endo-2	10817	3979.5	3764	0	19535.9	70.4167	27.6369	34.0536	2363.62	63.0179	29.4583	107.512	8453.24	926.411	71.3036	332.024	324.97	43.6131	2260.66	793.756	3790.65	613.976	1956.88	225.815	84.6845	132.292	911.53	87.2976	6.85126	-12.2185
Endo-2	10829	3982.5	3012	0	19431.5	42.2157	10.1438	3.69281	2446.52	95.3137	1108.99	129.065	10490	1065.54	39.6667	368.954	347.732	47.2092	2154.74	1171.2	2232.97	1020.14	4890.53	240.869	75.9281	382.137	817.15	87.4706	5.6423	-15.3152
Endo-2	10835	3979.5	5027.5	0	15371.7	125.509	30.5088	4.86842	5097.58	111.57	0.842105	116.675	16605	1262.28	52.307	1119.68	599.342	6.27193	4360.39	3426.59	4198.49	1928.89	7274.87	492.421	156.579	307.351	1108.6	486.921	-9.07212	-18.6813
Endo-2	10872	3993	10185.5	0	56383.6	145.588	353.851	198.471	3078.47	68.5412	459.878	75.3255	58482	2908.57	168.475	2089.75	1569.58	1310.93	7051.25	1810.5	4936.34	1923.75	2746.21	659.051	82.902	116.839	749.573	648.592	9.54084	-18.781
Endo-2	10890	3992	10908.5	0	54239.1	110.359	301.462	402.632	2595.58	341.94	4910.98	138.88	8454.95	1867.33	114.701	661.06	589.915	524.94	3056.95	978.479	3590.98	2057.14	2105.75	277.188	63.7607	463.359	872.675	126.991	9.11338	-18.9127
Endo-2	10900	3993.5	10900.5	0	51296.8	124.744	91.4231	208.731	2310.2	211.782	5658.63	107.141	8206.45	2292.96	140.795	492.705	1086.13	288.795	3094.76	904.077	4138.35	2225.73	2322.74	383.538	65.3077	460.769	1004.49	143.359	9.03291	-19.1407
Endo-2	10931	4009.5	10538	0	50801.3	98.7797	146.3	51.9163	2321.83	94.4626	383.031	127.599	8666.92	2182.7	110.617	343.33	1296.35	266.048	4583.44	2165.71	3247.66	1285.29	4198.57	825.062	96.6344	187.018	480.67	871.85	9.14146	-17.8818
Endo-2	10932	4004	6062	0	9743.83	35.5725	19.7101	107.268	8200.34	206.051	2545.46	189.014	5476.25	1533.03	109.123	549.587	1242.15	27.5652	6711.04	1589.2	4619.94	1167.11	4251.43	685.899	181.891	122.652	1802.53	98.1594	-8.18788	-14.8678
Endo-2	10958	4013.5	9625.5	0	27528	88.9937	12.3899	61.8302	2150.31	62.3899	4680.77	99.088	9250.44	976.522	63.4025	249.667	225.679	87.195	1877.37	615.17	2444.56	1087.38	828.289	190.069	45.8491	53.4151	417.013	56.1321	3.44393	-15.3373
Endo-2	10978	4026.5	7166.5	0	42435	73.2283	78.4657	36.5343	2728.47	184.059	588.05	128.466	12587.1	1459	114.014	923.763	858.872	229.26	2830.36	1523.09	2508.38	1523.3	1548.91	617.027	118.324	1861.63	682.233	72.1142	10.2424	-15.7747
Endo-2	10990	4023.5	7198.5	0	14850.1	92.6054	128.51	16.932	4660.48	180.361	6513.59	122.354	19067	1614.96	122.578	1116.29	1488.35	286.163	3351.8	665.517	1737.09	1118.2	1203.72	1301.29	194.578	1291.05	766.054	2208.56	-0.0881992	-14.7277
Endo-2	10998	4022.5	5461	0	29720.1	84.3448	32.1264	4.8046	1837.25	118.908	3108.64	102.966	22880.1	1681.74	157.92	1636.15	714.586	162.931	4117.98	1921.24	4550.8	1356.02	1932.21	690.966	129.69	1095.76	606.356	164.08	8.72807	-15.497
Endo-2	11001	4028	8814	0	24695.5	81.4247	37.0645	3.14516	1178.92	24.4892	610.237	190.806	12098.8	2588.46	122.699	577.984	2293.42	125.194	2473.76	1532.79	1967.99	1023.56	2480.11	1731.26	164.871	144.344	1390.35	154.86	5.26646	-13.4095
Endo-2	11007	4025	4282.5	0	29499	117.539	1.33333	2.19608	1243	105.676	1622.41	97.3333	3633.5	1064.03	63.5588	280.186	583.637	8.64706	1924.2	776.51	1436.15	797.853	1666.3	355.529	92.1765	260.637	546.059	103.539	8.62278	-12.2964
Endo-2	11008	4024	5180.5	0	15124.7	61.4234	24.2162	11.7838	5411	191.306	5354.55	200.495	12852.6	1714.07	110.829	898.063	136.234	185.135	3208.05	720.387	2900.3	1497.91	904.423	1950.08	181.613	597.658	158.189	93.5315	1.26353	-14.3094
Endo-2	11024	4034	4028.5	0	32894.4	74.7282	82.3744	160.39	4866.87	140.697	2434.68	193.779	7899.5	1566.08	88.7795	694.585	582.744	319.533	4159.06	1579.49	4028.54	1823.18	2171.23	724.774	114.656	121.328	1080.77	362.472	8.81335	-15.6348
Endo-2	11032	4032.5	8902	0	12143	115.526	17.2051	13	2742.93	169.397	5011.27	208.494	10465.6	1699.72	137.256	502.878	19943.7	34.2372	5197.22	1479.61	2795.25	1773.16	879.776	1238.47	193.494	52.7564	6924.03	1004.28	0.00104679	-12.8155
Endo-2	11060	4046.5	9187.5	0	13964.5	85.6652	0.273913	40.2	3843.88	302.648	3149.39	93.9869	16586.5	1142.04	89.7087	134.048	24880.4	3.37826	7726.1	2017.07	2871.6	1529.21	882.9	797.139	130.387	293.878	21947.9	193.704	-2.3168	3.77849
Endo-2	11079	4048	2936.5	0	26230.5	78.2926	35.8777	73.7467	4297.66	218.847	2412.96	129.769	11552.3	1928.24	120.773	342.153	1067.77	50.4847	3397.97	1494.41	2671.36	2037.03	6082.05	1207.13	204.249	950.786	1037.52	99.7642	5.71987	-15.9306
Endo-2	11082	4046	9659	0	25905.6	178.21	134.317	674.23	5220.07	273.687	1433.47	328.584	3492.4	2518.33	174.502	532.473	1207.44	299.72	3117.12	1013.48	2979.47	1188.35	2445.05	770.584	133.588	376.3	889.461	91.5268	4.82686	-13.8269
Endo-2	11087	4048	4061.5	0	17293.2	110.315	300.57	123.618	11444.8	359.952	1713.63	478.649	10462.5	3047.18	198.788	667.552	586.382	213.224	6753.1	2048.39	3938.3	2222.28	5854.9	2402.54	280.442	152.764	335.776	1061.28	5.06203	-16.0709
Endo-2	11101	4050.5	10445.5	0	24052.1	128.388	483.306	1906.34	4557.61	173.194	3211.48	149.077	8085.54	1962.23	106.684	665.362	1180.64	524.862	2838.96	3732.45	2344.39	1217.41	1770.94	1093.9	128.357	3210.47	518.949	7633.12	2.92408	-17.7869
Endo-2	11105	4047	4905.5	0	18523.5	68.1389	13.75	1.84722	592.792	154.681	2604.76	174.389	15095.2	915.125	59.0833	1253.03	495.292	158	573.861	153.083	1126.81	2457.1	1336.24	448.375	160.347	43.1806	629.5	514.847	6.33814	-8.78803
Endo-2	11109	4052	2972.5	0	29361.4	52.8824	4.60784	4.21569	4320.28	96.6797	308.536	93.8105	12419.4	1240.2	92.0915	412.216	837.621	11.3922	2431.93	1304.16	3294.37	1794.77	3873.83	813.189	89.0784	830.281	1014.84	102.078	6.5359	-14.8689
Endo-2	11119	4058.5	5397	0	15809.5	64.673	29.7547	14.5157	3379.15	130.78	476.535	209.522	20474.4	1993.5	95.1195	1359.49	822.654	128.805	4156.54	2794.86	2513.39	2020.25	1668.19	635.654	127.698	585.931	1011.42	97.9308	4.5584	-12.0108
Endo-2	11125	4057.5	9892	0	14279.1	133.463	348.952	289.483	1148.61	138.599	1863.78	201.265	25288.8	2244.97	91.6803	987.592	802.32	670.367	1947.27	848.381	1975.31	693.265	3684.22	437.177	94.1905	84.7075	419.259	149.558	2.36352	-12.8846
Endo-2	11126	4055	3884	0	16580.4	66.6353	0	2.6	2742.98	99.7412	5099.58	145.282	25708	1027.33	62.2	26.1412	9435.41	0	7202.51	2090.35	3259.48	3742.21	1036.56	368.776	170.071	659.376	39351	351.612	-1.67124	0.196572
Endo-2	11133	4056	9681	0	28141.3	113.465	112.95	481.851	1924.11	50.9109	1300.52	104.733	3596.85	891.634	49.7822	327.376	321.634	206.861	1969.27	260.228	1518.62	1440.18	2738.38	1032.36	161.891	18.3069	735.109	14.2673	7.4338	-13.2325
Endo-2	11178	4065.5	3884.5	0	35045.3	79.4203	0	269.768	2921.71	450.826	17699.5	175.362	23470.2	1770.16	152.725	60.4058	8810.42	0	8969.96	3672.16	4125.9	5265.38	2223.74	1237.41	295.464	1026.35	44053.1	545.101	5.34795	-23.5389
Endo-2	11184	4076.5	10514.5	0	26773.5	266.572	636.249	921.204	6700.15	193.657	3421.81	289.871	6226.69	3399.2	160.567	1000.91	2196.8	837.473	5331.61	2783.32	3910.48	1422.28	6919.95	1885.9	151.473	350.667	698.134	7779.02	4.68639	-18.2929
Endo-2	11196	4075	3903	0	6465.2	68.2033	0.821138	140.301	7593.55	214.748	11915	81.7642	34997.6	1128.46	101.837	1054.27	6722.69	0.097561	8224.6	2770.06	4723.15	3270.54	2247.4	224.016	89.6992	623.398	25107	844.008	-2.54881	-16.9014
Endo-2	11200	4071	9687	0	22408.2	141.3	59.8222	889.7	5075.56	353.344	1566.43	180.189	9812.44	1491.5	63.4556	554.867	639.267	243.9	2209.02	463.056	2744.44	1313.91	1389.29	672.111	80.4667	405.1	1165.5	187.511	5.9544	-12.2044
Endo-2	11201	4081.5	10488.5	0	25123.3	164.7	338.618	970.841	2943.45	232.029	2686.45	214.691	5954.85	2133.12	167.053	434.744	1517.67	337.266	3892.05	1488.67	2898.08	1037.34	2262.6	1417.11	182.739	2687.47	689.884	5204.61	3.14564	-17.5789
Endo-2	11215	4083.5	4364	0	33532	97.0182	99.6	99.3394	4083.24	94.8242	1916.56	139.57	40714.6	1706.27	88.4364	1025.16	564.721	179.903	2178.71	2463.81	3663.2	905.176	803.612	306.733	71.2061	1273.07	800.812	105.515	9.53733	-14.852
Endo-2	11240	4083.5	5566.5	0	26188.4	73.7111	15.0593	22.6741	769.43	109.133	838.104	171.022	12398.7	1426.14	98.2963	937.089	508.081	141.37	2079.68	1048.79	2486.28	2940.16	766.141	813.059	94.4296	1046.7	4676.22	69.3555	9.34423	-11.6237
Endo-2	11241	4091.5	7128	0	37719.6	152.591	93.1422	6.92672	2165.15	201.94	2045.19	192.862	13193.3	1501.72	79.5129	1182.34	1178.82	141.815	4804.31	1955.36	2547.03	2344.62	1597.75	732.97	149.319	3890.02	839.233	145.155	10.1019	-15.416
Endo-2	11244	4085.5	7964	0	22100.1	127.604	143.552	33.0714	4369.79	129.597	2396.38	155.948	8850.86	1356.34	77.8701	767.117	802.033	86.1883	4612.15	2061.1	3913.95	2055.97	1207.6	598.643	92.3182	443.065	455.649	135.896	6.91789	-13.1029
Endo-2	11248	4087	3778.5	0	48613.4	66.1875	7.37019	3004	5410.39	552.274	2004.65	179.346	31373.4	1724.05	61.8654	2042.26	463.928	1074.48	6241.28	12378.9	7743.89	2682.12	2550.23	578.399	93.9039	9933.11	979.279	126.567	11.1921	-18.4249
Endo-2	11253	4087.5	5657	0	39905.4	49.6504	4.11888	0.664336	882.699	107.35	244.769	182.07	14390.1	1079.66	47.8462	644.699	3663.52	44.4825	1068.34	997.65	1299.52	2324.09	269.287	370.587	56.4475	453.378	1742.9	103.51	10.8866	-13.5386
Endo-2	11263	4091.5	2917	0	6320.76	53.6497	135.22	15.0734	7274.23	117.582	3013.15	120.051	5977.12	1780.25	41.9887	230.232	1202.19	31.7232	5298.82	2023.4	3536.82	1652.64	6840.85	939.475	106.316	309.192	1140.79	172.096	-9.14921	-18.2617
Endo-2	11276	4099	3331.5	0	24844.7	57.7944	28.5889	12.4444	3039.69	102.556	1729.69	116.378	18542.2	1475.09	77.3389	1762.22	607.406	244.161	3125.68	1538.95	2639.91	2798.08	1669.44	309.05	65.1778	222.5	1041.79	411.128	7.20608	-12.9235
Endo-2	11283	4097.5	10153.5	0	29808.9	71.8167	437.789	163.228	2521.47	96.8222	1222.89	130.906	41256.2	2184.73	96.2222	1390.86	1315.68	947.322	3615.61	1608.26	2785.43	1427.29	3813.23	1164.74	96.1389	165.15	429.144	202.261	6.44998	-15.049
Endo-2	11299	4101	7973	0	43845.1	104.534	87.9814	32.7888	5486.98	163.18	693.547	154.932	15750.2	1849.84	94.3478	1067.1	1068.23	161.652	5662.85	2322.45	3971.51	2768.58	1460.94	1004.17	152.447	372.54	644.801	129.174	9.9172	-17.1179
Endo-2	11302	4099	3767	0	46152.4	63.3426	28.2963	602.602	7651.1	591.806	2454.19	171.537	19206.6	2036.28	96.8796	1312.63	785.602	1169.3	7798.2	12442.1	4781.88	2736.31	2814.1	1010.03	142.815	10364.3	853.963	93.4444	11.3307	-18.0204
Endo-2	11317	4109	5463.5	0	23800.5	60.7562	53.1642	37.7264	5446.72	134.274	180.701	219.93	7439.86	2100.86	90.3383	396.786	389.363	75.1741	2974.99	3332.57	3197.04	1453.86	4743.95	612.642	131.05	148.448	365.02	105.806	5.9631	-15.2119
Endo-2	11332	4105.5	3546	0	18089.4	31.2045	2.58333	277.78	2973.7	322.364	89.9924	108.235	10948.9	1812.67	82.9015	745.258	585.583	17.5606	2671.19	2754.78	2635.18	1666.55	2213.06	722.561	90.3636	3181.95	593.061	123.583	5.23272	-12.6909
Endo-2	11334	4106.5	5524.5	0	17035.4	71.9252	18.2857	22.1973	3938.33	189.238	1779.92	288.333	9316.32	2090.74	146.939	423.19	711.497	62.4762	3472.2	3651.37	2188.03	1646.71	5241.78	1001.05	172.544	109.238	1560.04	142.864	5.49829	-15.5828
Endo-2	11342	4114.5	3713	0	20654.7	48.3	2.84	0	568.187	103.773	1226.37	106.093	24138.7	1013.55	50.2733	1816.44	132.193	49.3667	1377.61	1352.44	1528.59	3246.91	1772.41	104.64	132.967	431.26	458.533	125.007	7.46841	-9.68488
Endo-2	11372	4121	3321.5	0	9870.11	71.1635	5.33962	5.01258	2602.45	128.358	9324.58	96.6038	15065.1	1326.28	49.7107	1199.53	633.019	55.3711	3615.25	1376.7	2006.37	1291.11	2799.09	305.377	50.3711	117.723	993.34	3701.59	-0.75215	-16.8758
Endo-2	11373	4119	3744	0	13653.7	60.4789	47.6338	16.4859	8768.15	110.613	2306.66	89.4225	10953.9	1688.7	58.1268	2221.3	724.317	289.782	4081.63	1316.6	2561.16	559.063	3367.66	445.324	53.2958	43.3028	756.296	53.9648	2.45053	-12.5718
Endo-2	11378	4122	3132	0	3620.21	131.199	0	0	4193.47	498.854	445.49	246.152	17081.4	1514.52	212.808	0.145695	20495.9	0	8765.37	1266.95	3797.3	2354.56	366.768	976.265	197.265	190.212	32055	185.477	-0.638858	11.126
Endo-2	11393	4123.5	7983.5	0	31821.6	110.169	68.6462	38.1615	2783.83	216.985	2607.02	210.115	9241.32	1280.59	91.0769	268.015	585.346	101.954	3795.73	2194.93	1922.65	1308.62	4168.28	1160.45	141.692	145.931	950.6	102.792	6.46381	-15.1704
Endo-2	11405	4127.5	9194.5	0	30430.9	93.1436	3.39227	4.31492	1499.82	144.365	1438.4	126.436	14052.6	1290.89	54.6022	363.691	648.901	62.8398	1061.93	826.387	1572.83	1638.04	531.608	610.182	111.094	1012.82	647.442	126.564	9.74758	-12.2789
Endo-2	11425	4141	3751.5	0	25286.5	70.2091	9.8432	6.04181	2712.35	124.15	1514.69	127.892	9059.12	1310.11	68.885	350.157	429.634	43.7317	2414.58	1367.64	2852.36	1287.57	1510.32	527.564	82.561	353.868	825.174	80.453	7.34316	-12.4571
Endo-2	11430	4132.5	3716	0	27140.1	44.7333	2.425	2.28333	1815.94	91.3333	379.892	109.183	12723.3	1091.35	57.5	882.383	164.292	77.5667	2126.2	1301.42	2807.97	2312.38	2864.88	194.175	82.6583	1412.67	387.175	97.9583	6.81646	-14.0856
Endo-2	11440	4139.5	4836.5	0	43206.2	159.178	25.6074	31.1694	2013.26	97.7686	3832.87	106.079	15070.2	1638.54	98.3306	1361.44	356.864	216.641	3203.69	3071.88	2337.51	2467.9	1716.39	230.248	61.9421	913.231	470.157	5988.08	4.37177	-19.3894
Endo-2	11468	4155	5570.5	0	13324.7	74.1511	13.9421	5.23473	2220.64	65.2058	378.109	129.492	6254.9	1414.92	369.109	244.141	3398.14	50.8424	6549.02	1195.5	2266.68	1021.48	1377.29	336.212	63.1929	385.225	18476	88.4662	-3.82953	3.96036
Endo-2	11469	4145	3335	0	18935	54.981	14.9905	7.64762	2492.57	96.0476	970.657	72.5048	12578.4	1503.27	52.3524	466.41	918.552	16.7048	2718.07	1345.1	3495.68	1625.65	1296.59	238.952	61.3048	261.676	917.619	106.429	6.52967	-12.1486
Endo-2	11502	4156.5	8202.5	0	22322	64.2262	77.3214	79.0774	5079.88	144.292	6726.93	199.048	6062.17	2176.75	86.1726	574.679	2132.11	250.256	3166.57	1090.55	3038.96	1641.83	1776.33	1949.2	191.149	148.625	1205.33	499.298	2.08714	-15.6503
Endo-2	11513	4160	3257.5	0	21969.9	41.1046	100.412	22.3987	3591.8	213.17	73.9673	172.34	5718.3	1842.35	99.634	316.654	1036.8	59.7712	3317.97	1250.47	2988.9	2192.58	3975.52	1640.18	224.085	1457.72	789	32.2876	5.99824	-14.759
Endo-2	11521	4157.5	4831	0	49200	82.4365	26.6984	24.627	3475.6	178.31	3972.66	139.722	11814	1882.16	115.143	1158.43	234.254	182.032	5691.29	3379.23	4062.75	2852.01	887.23	454.103	96.0079	1426.02	209.54	418.619	9.85614	-17.8356
Endo-2	11530	4164.5	5937	0	4797.62	62.6208	0.575	0.0208333	2837.9	168.225	11079.5	136.171	8559.56	1385.97	119.617	218.033	1071.76	0.504167	4074.18	1388.8	1700.96	1893.76	996.696	573.675	118.154	146.613	4968.1	202.154	-2.14323	-16.1837
Endo-2	11542	4166	4317.5	0	14613.5	46.701	16.4412	9.01961	5072.62	65.8628	1729.54	78.8774	15129.6	1303.41	67.8676	924.363	366.382	88.201	1970.85	619.745	3547.68	1039.29	654.995	234.235	69.6274	50.1716	418.417	107.706	6.41025	-11.6709
Endo-2	11543	4163.5	4839	0	27560.2	70.8992	53.8992	35.8992	1586.41	106.186	1021.53	151.233	10699.6	1390	77.1008	806.558	295.264	137.481	4168.69	2862.16	2490.87	2331.92	1736.31	362.729	140.473	1096.33	483.457	77.1783	7.71749	-12.9329
Endo-2	11572	4168	10181.5	0	52153.6	116.125	77.6458	186.323	1507.78	71.1458	3609.15	151.885	8614.38	1986.73	54.1146	365.031	1418.76	287.688	3709.99	1036.12	2178.2	1254.22	2081.18	796.406	53.75	49.9375	411.073	4059.59	9.0459	-18.2752
Endo-2	11573	4167	7301	0	15893.1	61.9067	92.0133	81.9067	2756.35	72.8	3216.49	87.9867	12953.9	1262.39	65.64	645.6	1008.6	189.813	2896.37	1068.71	1783.99	1398.92	1792.88	839.867	152.827	87.5067	743.453	91.08	1.48541	-12.2857
Endo-2	11596	4178	5918.5	0	16600.8	59.7172	1.5101	1.68687	1545.72	106.601	7231.48	132.99	11205.2	1266.29	71.0101	332.818	276.202	5.67677	3860.42	2142.44	1956.49	1868.69	2357.22	229.53	89.4242	162.182	755.258	161.692	-0.173959	-15.3514
Endo-2	11608	4180	8832	0	26861.1	85.9934	6.31788	236.371	1227.5	108.914	6780.83	133.371	24398.1	1697.45	118.576	931.954	1608.48	43.1987	3894.86	9516.99	2416.87	2874.13	1292.65	1539.79	240.397	3864.58	10053.8	3765	1.58061	-17.099
Endo-2	11623	4187	8987	0	29553	116.288	125.273	356.414	4768.91	154.5	5299.1	308.646	12242	2513.28	166.025	812.414	2095.02	621.859	4871.09	1595.53	3398.02	1378.42	2544.59	2641.79	326.354	282.51	2288.48	322.798	7.53235	-16.7095
Endo-2	11636	4187.5	10818.5	0	50820.7	105.742	176.421	356.925	1800.91	67.805	3251.3	119.094	4376.58	1310.98	63.1572	263.535	748.799	246.862	3084.3	1519.94	2026.25	783.824	2554.34	523.396	76.2893	72.805	732.805	312.585	9.73521	-16.8968
Endo-2	11705	4205	3729.5	0	38466.8	58.6204	16.9167	34.213	2221.97	161.056	19.8056	140.537	16849.3	1066.02	48.3519	604.528	300.806	25.3241	2474.92	1944.15	2519.79	4236.79	1386.07	937.556	175.722	6017.53	587.361	133.528	11.215	-14.5942
Endo-2	11723	4212	9167.5	0	20353.7	92.4933	58.76	556.833	1988.2	132.387	5852.67	206.66	7042.89	1667.28	128.987	942.28	1195.03	391.72	1946.04	918.32	2452.03	851.313	1765.91	576.633	94.16	288.96	665.68	172.64	1.62963	-14.8518
Endo-2	11740	4214	9431.5	0	13520.8	156.37	26.6389	143.407	1286.27	134.944	6549.69	228.454	9122.37	1965.44	104.315	370.574	1278.52	90.25	3116.08	1130.86	2708.5	1445.76	1637.38	809.519	102	116.315	360.981	4431.89	0.342748	-15.2273
Endo-2	11769	4225.5	7353.5	0	28863.4	81.2586	173.27	125.638	2838.96	115.27	441.661	77.6609	2867.56	1707.21	83.0287	384.569	1217.81	117.655	4384.11	2585.35	2184.53	767.063	2273.98	710.782	116.316	367.718	703.121	92.1782	7.17534	-13.8592
Endo-2	11770	4222	8143.5	0	18475.4	36.563	90.8518	5.54074	893.015	43.7482	13439.6	52.5481	11966.6	841.067	35.037	652.674	691.556	116.978	1036.34	493.837	838.933	934.052	374.704	170.185	69.1482	263.348	163.459	112.207	-1.07453	-16.6276
Endo-2	11811	4231.5	4817.5	0	8729.52	42.5152	123.856	412.091	3912.26	177.576	12504.4	79.2576	7362.3	1008.67	77.2803	939.72	749.121	124.371	2881.65	2247.02	1433.2	2528.08	3140.93	105.47	58.5985	1243.39	952.705	1301.23	-1.59411	-16.7354
Endo-2	11833	4238.5	7924	0	26998.8	132.086	13.6173	1.83333	1921.94	117.525	4292.87	154.302	3619.65	937.012	58.6235	146.302	648.191	1.80864	4359.7	1263.91	1783.05	810.111	483.457	370.296	68.5926	127.883	539.803	115.92	3.51104	-15.3233
Endo-2	11870	4248	8929	0	24348.1	64.6474	92.2051	22.3718	1529.68	76.5128	531.833	138.333	2131.34	1622.6	103.231	319.885	1402.91	119.474	2660.19	648.526	2099.21	368.846	348.186	681.282	86.8718	130.686	2458.86	146.84	7.23546	-10.9271
Endo-2	11876	4246	7911	0	22311.1	148.992	25.1417	0.3	2432.07	113.775	2785.31	264.158	3725.57	1612.77	106.708	165.392	938.333	5.48333	3668.11	1310.89	2257.45	817.8	441.058	860.708	146.758	274.142	532.217	132.667	3.88706	-13.4759
Endo-2	11899	4254.5	5927	0	30201.9	74.5938	11.6667	29.7396	305.896	73.8125	29.1979	139.573	8086.36	1392.29	67.3021	247.979	138.354	25.9062	1858.19	2292.26	1096.69	1223.72	1878.31	452.042	54.8646	258.01	515.833	50.2292	8.66378	-12.5083
Endo-2	11901	4261.5	10752.5	0	28353.8	128.667	369.889	578.097	3149.86	108.86	3960.59	147.184	3418.11	1833.35	85.942	574.681	1269.71	500.855	2327.29	260.589	2528.31	865.382	1237.4	1207.14	139.754	78.1691	603.188	1708.47	3.66656	-14.4421
Endo-2	11904	4261	7611.5	0	30985.4	87.5989	110.914	160.187	2421.59	132.722	282.818	137.219	8258.08	1413.66	58.0053	587.075	227.529	161.412	2330.07	1904.66	1967.87	998.775	2614.81	748.187	126.957	339.358	145.722	105.599	7.42168	-13.8839
Endo-2	11916	4269	5547.5	0	28119.5	70.5747	47.3701	142.883	1438.89	139.451	1602.08	185.244	13425.2	1393.94	44.6364	931.724	441.422	143.315	3603.59	1872.71	2220.16	1502.59	3898.09	521.792	103.701	142.672	663.721	232.477	6.35089	-14.9067
Endo-2	11938	4267	8322	0	16863.3	91.034	49.3878	128.952	844.844	52.0884	568.775	228.395	8796.26	2093.24	139.252	422.51	1724.4	253.361	2886.97	508.871	2819.86	690.429	579.102	1991.86	194.49	149.81	791.497	170.673	4.39854	-12.3205
Endo-2	11978	4280.5	5575	0	26181.8	85.9952	36.3702	47.2356	2996.3	82.7933	1642.79	138.5	8941.4	1682.78	79.1586	765.317	343.947	27.3269	3945.88	1267.41	2456.48	1746.46	2045.42	308.519	83.6923	261.308	331.966	158.798	6.65789	-13.1349
Endo-2	11980	4278.5	7605.5	0	36210.4	80.9713	174.897	158.747	3599.51	143.713	433.029	97.2529	7594.25	1665.59	54.477	563.885	530.621	180.557	2624.98	1390.44	3215.11	611.724	2093.34	870.425	127.287	486.414	625.546	99.1322	9.09361	-15.1556
Endo-2	12039	4290.5	6241	0	22437.4	40.7803	12.5152	5	2998.3	70.2045	742.606	66.6742	13535.7	1544.39	49.2273	751.197	895.652	25.5909	2780.92	914.53	2760.92	1229.82	1686.33	361.606	47.2727	248.659	608.576	119.803	6.38394	-12.4423
Endo-2	12042	4292	11028.5	0	18507.7	84.305	277.589	559.142	3560.13	218.809	776.752	109.688	3841.27	1873.56	118.184	424.007	2490.09	327.745	3066.8	465.177	2454.91	477.085	1311.88	796.397	113.688	324.291	19425.1	178.645	4.67156	-12.075
Endo-2	12046	4293	8235	0	24377.6	91.2246	115.196	44.7754	813.775	84.0652	2607.55	162.094	17091.9	1755.09	95.0362	846.616	1449.96	433.768	2915.09	627.92	2070.92	1287.46	554.072	1381.99	161.225	151.899	974.152	113.21	3.99481	-13.5826
Endo-2	12050	4299	11043	0	22803.1	100.333	37.6164	73.9434	1674	126.258	555.786	169.855	6462.62	1829.19	152.767	233.711	1705.42	220.918	2433.13	432.283	2312.28	733.711	829.818	1213.03	131.201	464.667	3635.17	172.805	5.24443	-12.2638
Endo-2	12087	4309.5	7051	0	53308.3	121.623	66.0686	58.1829	2131.9	212.24	4855.77	157.303	20805.4	1571.81	84.3371	2268.13	549.829	262.457	2202.7	2286.65	2400.25	2370.17	2605.54	1410.89	190.109	1083.08	213.126	784.977	8.24022	-18.6831
Endo-2	12096	4318	10991.5	0	21349.2	109.223	23.0582	14.5068	2136.5	100.914	2652.77	176.62	6607.57	1691.67	110.431	123.223	530.884	102.113	2430.8	631.709	2469.46	1227.95	949.908	470.346	85.2329	531.558	4977.81	147.61	3.85625	-13.5528
Endo-2	12125	4318.5	2949	0	17025.8	82.9955	25.4598	24.5134	1803.29	89.5402	143.192	107.277	5794.1	921.482	68.7545	184.906	182.219	13.9866	1654.6	837.536	3332.79	1080.11	893.098	472.281	100.643	281.442	547.402	80.9107	6.75767	-11.3764
Endo-2	12145	4327	4913.5	0	20742.5	94.1466	41.9655	15.375	3073.37	197.543	3946.19	215.789	17497.7	2116	148.233	1027.09	1198.6	80.4784	3916.69	2252.35	2622.53	2049.72	3111.74	742.927	154.931	1193.64	712.582	1392.19	4.41583	-14.583
Endo-2	12155	4327.5	4248.5	0	41382.6	264.317	35.3778	2929.54	1249.24	535.528	4368.15	155.633	12351.7	1112.19	86.9056	783.822	372.55	91.0556	2958.36	615.544	1394.88	947.333	268.889	590.139	146.272	137.55	648.506	87.3667	8.957	-13.9003
Endo-2	12190	4332	10305	0	31766	134.193	419.567	749.407	2384.88	236.313	4352.65	193.347	6329.76	2255.91	122.587	552.78	1232.47	406.987	2836.51	832.853	2985.73	1554.33	1129.71	1233.03	132.473	1753.69	575.867	405.847	7.87575	-16.6031
Endo-2	12222	4337.5	10236.5	0	24732.8	87.3958	138.833	769.469	1672.35	111.365	6832.42	123.573	6932.8	2115.79	45.0521	599.969	737.125	363.896	2561.58	2051.04	2490.6	1725.54	1725.19	562.448	111.01	1071.27	67.2812	287	2.09298	-15.752
Endo-2	12235	4345.5	10266.5	0	44897.9	147.127	244.763	1014.68	2484.62	106.589	2773.57	223.013	9299.99	2502.59	147.301	565.877	1167.99	417.801	4542.88	1905.21	3889.24	2421.55	771.305	1055.44	144.814	2429.53	697.22	421.945	9.61308	-18.8189
Endo-2	12249	4346	7935	0	23538.5	95	45.6504	22.8374	4027.98	166.358	3587.55	135.976	10968	1703.07	90.2602	757.033	1591.54	94.8699	2991.85	638.52	2167.14	1650.29	864.195	775.171	111.805	183.545	636.301	144.138	3.66531	-13.8975
Endo-2	12289	4355.5	7586.5	0	20537.5	133.302	24.3765	9.45679	2993.99	223.895	1616.59	147.451	12656.7	1166.25	120.463	440.617	2221.8	14.2531	2988.52	1347.43	1591.74	1184.2	1170.96	755.488	133.29	356.389	8025.59	185.105	6.18145	-10.2442
Endo-2	12299	4357.5	10949	0	19220.2	74.1497	110.707	89.4286	1648.29	76.6531	1723.97	190.939	6334.14	2039.41	92.0612	309.184	5534.27	284.116	2527.05	683.401	2228.19	973.483	1733.91	1183.36	133.592	823.585	4781.46	176.17	4.56642	-12.7619
Endo-2	12309	4360.5	4314	0	19335.9	60.938	114.023	48.3953	4131.89	73.2326	154.798	89.9147	1345.34	1731.55	96.4806	162.023	948.992	113.837	2884.33	1476.64	2623.96	346.147	2813.37	327.705	59.8992	372.147	565.256	91.6279	5.42845	-13.0145
Endo-2	12311	4363	9667	0	24875.6	105.175	71.4599	83.1679	708.015	190.277	8623.02	225.993	9837.76	1830.56	116.336	511	629.277	213.35	2805.26	1055.94	2254.44	1481.14	1237.95	808.883	58.6934	267.971	642.489	2604.14	1.51924	-16.6643
Endo-2	12312	4362	4449	0	43679	64.5741	34.2176	55.9259	901.431	67.8565	1499.15	88.5	3929.87	1520.77	70.8704	271.407	577.315	99.2639	3137.09	1939.98	1963.89	1109.71	2319.19	266.912	69.2963	2597.82	566.991	96.7963	10.0525	-15.9304
Endo-2	12316	4366	10566.5	0	36069.4	349.291	58.922	39.2766	956.064	61.0993	1271.89	193.121	3380.06	1575.03	121.986	24.539	703.149	11.5887	2011.81	626.319	1650.29	923.872	657.461	345.915	122.34	305.993	115.426	1632.48	9.1423	-13.7138
Endo-2	12318	4368	9265.5	0	24491.5	105.581	88.899	160.525	2541.61	194.414	3905.33	146.662	9803.35	1252.77	77.2475	592.727	833.51	279.803	1980.3	607.475	2526.55	1170.39	784.652	499.02	99.4596	130.727	471.202	1926.68	2.79905	-14.72
Endo-2	12348	4370	5675	0	17721	48.4259	18.9074	29.0494	3411.33	83.5494	1154.56	193.395	11062.3	1485.47	69.2963	650.376	257.179	77.2346	2286.86	1340.26	3759.3	1437.73	3493.81	563.549	91.9877	438.117	788.407	91.8642	5.56283	-14.225
Endo-2	12355	4375	2541.5	0	37796	42.0604	36.4161	5.13423	1836.46	45.6309	807.362	49.7047	5986.38	1160.64	65.2416	57.906	235.383	23.0403	2205.23	1020.11	1127.77	841.228	7183.23	309.242	51.1812	5203.7	493.255	53.5436	6.06147	-16.2206
Endo-2	12359	4370.5	10514	0	13831.6	102.884	156.779	85.4419	946.209	29.8605	10341	144.5	12937.3	2469.12	145.628	636.523	1287.65	401.791	3646.3	771.977	2853.07	2060.9	896.023	1114.58	213.186	275.372	794.965	360.814	0.0973967	-16.0654
Endo-2	12363	4382	4417.5	0	49111.5	103.61	31.0791	10.9661	821.39	76.6271	4159.01	85.2655	19623.8	1254.69	71.6271	1248.29	380	215.61	3641.76	2023.63	1677.02	2461.22	1264.53	293.367	63	2122.65	548.678	708.435	9.88483	-17.0616
Endo-2	12402	4393.5	9640	0	613.702	134.487	209.715	295.759	37146.7	71.8202	14287.4	176.421	6673.46	2122.51	79.693	643.075	657.781	299.947	1938.54	567.57	1845.21	1114.14	869.816	787.482	68.864	113.43	305.982	4441.63	-2.04023	-16.7058
Endo-2	12409	4396	10579	0	32266.1	98.9326	204.534	729.891	2306.57	110.342	3772.81	144.228	2470.12	2293.4	131.689	345.617	1428.11	358.767	3765.06	1168.99	2969.68	939.145	2415.08	1431.6	202.751	633.756	552.088	84.5648	7.69926	-16.5779
Endo-2	12415	4393	2954	0	29660.7	60.6842	9.67544	5.7193	616.123	106.57	1539.54	132.982	12251.9	903.026	42.2807	308.333	648.991	14.2895	1518.1	707.368	1084.08	1678.61	1917.77	807.158	101.272	608.263	1758.58	75.1667	8.57222	-12.3939
Endo-2	12424	4392.5	6986	0	353.111	86.6333	32.4667	126.978	3385.59	136.4	14610.2	96.7222	19116.9	1662.31	78.2667	2388.34	626.578	273.489	1863.78	324.378	1598.14	1280.48	1032.27	943.778	64.7556	40.6889	666.878	3862.71	-1.99625	-16.7117
Endo-2	12437	4397.5	4257.5	0	14879.2	85.5619	73.181	40.2095	2939.76	172.838	8581.04	208.571	16567.1	1825.35	149.752	1232.79	1074.4	205.781	2619.13	844.714	2009.18	2291.1	2106.03	283.19	119.352	384.352	894.057	219.171	-0.0365699	-15.8083
Endo-2	12438	4401.5	8706.5	0	17596.4	72.5896	165.451	2458.38	3103.75	299.514	10287.9	118.746	19082.4	1465.35	86.6185	1078.64	700	277.225	3213.27	1648.02	2054.13	1598.58	479.52	795.63	90.3526	3145.7	811.046	480.341	0.865555	-15.9244
Endo-2	12451	4405	10553	0	12930.8	70.4317	186.084	542.37	2785.59	124.634	4715.26	114.542	1584.8	2142.73	106.956	394.352	1326.34	373.37	2948.15	852.154	2239.67	409.745	3505.88	1035.85	115.172	269.009	842.132	890.405	1.86361	-13.2253
Endo-2	12454	4400	10558	0	16353.2	57.4058	112.884	306.913	1913.7	58.6522	4697.81	78.2174	956.855	1537.65	50.1449	333.725	838.348	209.986	2890.39	1046.93	2315.42	378.739	4413.1	478.826	64.5942	206.696	517.725	42.1594	2.07515	-13.1138
Endo-2	12456	4401	5725.5	0	26207.1	83.49	0.321285	4.25301	2746.82	120.289	368.39	183.498	11624.6	999.61	33.6305	323.928	220.514	3.9759	3662.29	1086.67	2229.07	2368.64	395.566	380.309	139.149	489	1545.28	160.237	9.39502	-10.72
Endo-2	12459	4401.5	10567	0	14129.4	111.063	126.114	587.228	3828.97	99.0886	4342.76	151.544	758.076	1961.73	142.671	306.987	1053.67	301.177	3243.66	1188.29	1963.25	411.051	3974.11	1000.71	136.481	317.62	542.57	46.2152	1.94952	-13.1271
Endo-2	12467	4408	6999	0	49303	94.142	73.7469	86.5432	2098.94	166.358	1073.05	152.525	11393.8	1852.27	83.0926	1465.48	946.21	276.105	3356.86	2238.14	2817.98	1285.06	1495.33	1458.62	126.463	3179.39	217.185	110.858	10.4973	-16.697
Endo-2	12498	4418	4255	0	20790.1	42.1808	22.4255	6.64894	2065.22	86.8298	2076.76	121.245	12167.1	1178.7	60.8617	668.17	316.324	74.4362	2258.05	1277.86	2147.59	1370.03	1274.46	269.149	64.9521	588.782	474.734	100.053	6.50212	-10.8138
Endo-2	12508	4417	4382.5	0	26895.5	91.8862	43.9919	16.9106	5299.52	101.024	459.089	111.561	9419.82	1840.14	114.585	606.691	791.398	159.407	3482.76	604.772	3770.97	1688.09	795.455	395.577	63.6667	1195.28	579.276	111.179	9.24482	-14.1747
Endo-2	12522	4420.5	7823.5	0	24161.4	185.585	8.87719	17.924	3657.95	367.257	20.5848	260.696	6033.97	2094.29	137.386	242.696	1353.18	46.1462	2485.63	1384.81	951.567	791.591	2526.15	918.579	167.035	594.825	412.409	135.515	6.32766	-12.6931
Endo-2	12559	4440.5	5115.5	0	48936.3	83.3371	31.9925	26.6217	1994.73	78.0225	2542.19	176.551	13008.4	1668.97	72.6854	1304.21	311.573	121.581	5329.08	1342.11	4947.16	2019.09	944.067	485.974	79.3034	2949.31	657.221	2307.53	10.1414	-17.8568
Endo-2	12584	4438.5	8666.5	0	49656.7	62.96	51.94	5.85333	1289.15	31.98	6764.34	87.7667	9739.25	1522.72	49.7267	593.24	715.047	93.4667	4169.21	1353.63	2303.97	854.947	968.967	977.193	105.673	39.8267	293.04	2132.41	7.46134	-19.3769
Endo-2	12604	4450	6621	0	32108.9	70.9583	8.95833	1.63889	1837.38	116.44	775.815	107.056	10282.1	1455.55	75.25	622.699	791.792	65.8657	2639.06	705.981	2262.59	937.704	515.361	514.264	118.625	184.514	2161.11	346.042	9.69627	-12.6461
Endo-2	12624	4454	7980.5	0	30905	104.202	61.4262	42.9836	2757.01	123.541	690.339	158.913	6964.21	1497.96	61.7322	505.055	734.962	147.634	2314.67	862.404	1718.63	1361.51	2637.89	924.634	156.355	1481.53	409.322	151.126	7.47711	-13.9247
Endo-2	12652	4461.5	5205.5	0	15441.6	57.7284	77.1852	1808.46	3766.67	167.185	1621.8	192.654	12657.1	1712.58	113.494	1109.8	6663.28	95.5988	3152.97	1096.1	3262.88	1895.82	1527.36	558.66	111.673	2038.96	7659.52	126.642	4.83578	-12.5973
Endo-2	12662	4462	8634.5	0	29547.5	84.9767	137.38	118.38	2373.43	185.194	2281.55	116.054	2997.44	1320.47	57.4496	345.318	732.535	97.8217	3156.81	965.977	2480.02	745.132	806.527	672.698	110.783	119.922	482.674	354.046	9.12088	-12.699
Endo-2	12672	4462	2691.5	0	54560	101.865	87.9375	5540.21	3180.46	581.188	6971.11	118.792	10418.5	2298.65	30.9479	1143	364.25	227.688	4838.89	6595.5	3347.04	3156.31	5879.23	735.354	94.4896	5247.85	144.208	7194.56	9.76981	-19.9444
Endo-2	12690	4469	4517.5	0	22325.6	66.4333	60.5533	12.2533	4224.13	90.2667	2121.23	103.927	2978.8	1641.38	75.1533	130.1	425.553	107.207	3417.6	1139.12	2558.53	873	1644.15	649.833	95.4667	100.427	696.62	687.88	5.70935	-12.8454
Endo-2	12707	4474.5	5191.5	0	18125.8	45.6918	31.6541	689.591	4593.47	173.736	1723.23	215.667	8202.92	1995.67	84	807.648	2728.96	129.176	3684.2	1830.86	3019.52	1535.72	2021.76	713.359	155.031	1333.92	1572.14	76.088	5.09804	-12.8596
Endo-2	12723	4479	9993	0	23402.6	119.847	80.2761	90.6319	2375.29	80.908	3993.03	259.571	2088.06	1697.36	108.748	241.595	948.251	115.46	2241.89	624.405	1442.9	909.62	517.393	875.595	117.466	393.933	300.037	373.804	3.62737	-13.6385
Endo-2	12724	4476	2605.5	0	9132.8	83.2484	83.4967	51.2157	3450.82	49.2484	3550.18	121.797	9502.64	1508.83	75.5752	638.922	665.954	66.8497	2148.55	1329.31	3738.91	1775.63	5878.43	368.105	63.549	2225.96	489.091	70.2157	-8.87223	-17.9047
Endo-2	12762	4482.5	8598	0	4549.14	64.8529	60.951	92.6667	793.716	67.1176	13156.7	55.6176	3555.43	979.941	56.5294	192.333	438.235	119.441	1396.77	358.382	598.578	454.363	791.01	326.098	25.5294	29.6373	490.157	1562.42	-1.99258	-16.3755
Endo-2	12775	4486.5	5633.5	0	26262.2	58.8611	11.2778	1.87037	2589.05	83.6018	11.1481	196.815	4705.79	1474.61	74.1389	67.1296	97.1204	60.6389	3182.55	1089.92	3027.18	1670.17	340.315	461.028	87.4907	1284.96	693.694	114.037	9.3115	-12.0638
Endo-2	12796	4492	10718	0	45546.8	128.607	283.161	37.9821	844.938	83.7946	2895.39	133.08	6431.65	1526.62	103.429	546.902	836.098	347.812	1672.62	635.5	2574.73	1262	543.634	442.545	58.3839	126.911	559.464	1045.08	9.99471	-16.606
Endo-2	12802	4498.5	10135	0	45921.5	86.6823	15.1	33.5471	2784.23	169.876	6618.48	125.459	8845.05	1358.62	111.994	255.965	648.682	139.535	2414.34	474.335	2984.19	1380.48	571.818	696.618	73.9176	518.406	350.288	193.206	7.51763	-19.4263
Endo-2	12806	4501.5	5169	0	39533.7	85.0208	28.0278	3.22222	2239.56	123.736	1263.58	230.132	14156.6	1490.26	78.625	913.91	122.569	75.7431	2519.19	924.285	2148	1458.28	1157.81	379.826	107.743	1923.51	438.493	292.944	10.4581	-14.3891
Endo-2	12809	4500	6932.5	0	36439.1	52.7879	36.0101	90.6768	1620.55	302.859	6051.71	200.929	13184.6	1648.76	99.2222	1172.54	898.141	342.182	3839.93	1229.94	1922.41	3288.84	1143.79	1265.06	162.343	955.374	342.828	78.8788	7.11839	-18.1457
Endo-2	12822	4511.5	8621.5	0	28358.1	107.671	28.1968	133.422	2855.39	147.161	7919.37	142.036	19100.7	1702.38	88.4297	937.639	826.98	123.124	3382.78	1250.98	2602.1	1998.6	1115.78	929.41	144.125	220.747	814.691	1971.08	1.96043	-16.5739
Endo-2	12826	4502	6622.5	0	38267	82.2353	16.0882	10.1544	1407.17	111.551	6112.23	65.7206	15717.8	979.625	29.8088	1450.97	2936.55	106.287	2313.57	1591.4	1828.4	2347.6	1397.16	370.272	62.1618	1529.77	5319.16	4233.73	4.9991	-18.9342
Endo-2	12829	4516	7296.5	0	25201.6	105.372	70.931	65.2261	3452.08	138.096	1343.57	148.153	22264.1	1327.88	58.4828	3435.82	854.307	488.544	2685	1904.7	2960.91	1117.92	2609.87	431.831	95.4751	67.4521	536.701	3227.12	6.38446	-13.7369
Endo-2	12845	4510.5	10146	0	48003.4	120.762	139.162	113.114	1542.5	83.8	7756.49	152.876	9130.14	1476.63	98.4714	594.643	691.205	238.086	2374.59	481.448	3811.12	1566.88	363.319	542.881	79.2238	575.71	692.9	168.167	7.47164	-19.992
Endo-2	12855	4512	10163	0	48879.4	98.163	104.636	56.4022	1459.31	133.299	7840.38	142.342	6466.92	1440.73	75.7011	394.935	840.071	161.734	1947.11	416.788	3126.15	1274.67	214.522	423.071	75.375	547.484	568.897	127.364	7.47855	-19.8195
Endo-2	12867	4511	5205.5	0	10211.6	54.0725	0.608696	13.3478	2513.07	62.1449	4284.99	194.493	6946.91	1777.94	69.1449	343.841	401.71	26.8406	2307.39	2936.59	2025.06	931.797	5935.1	928.42	89.3623	691.725	748.174	77.2029	-9.52092	-18.2727
Endo-2	12868	4522	9118.5	0	10702.7	85.6933	25.7143	407.655	4379.11	208.786	282.378	183.992	9662.11	1502.34	55.8487	372.471	792.937	132.761	2468.84	849.193	2404.96	645.466	1577.62	1163.05	136.697	132.824	428.912	126.101	1.48312	-9.55186
Endo-2	12879	4516.5	6663	0	18609.1	78.8485	46.6742	17.3182	2427.94	205.038	11373.7	78.4773	14976.8	1587.19	68.9621	1548.18	609.621	129.258	3698.56	1294.48	1765.83	1581.48	668.652	302.326	63.3258	840.182	896.545	2076.28	-0.36064	-16.7839
Endo-2	12883	4517	4371	0	37116	48.9778	21.7556	37.1333	1370.66	77.8444	5310.07	109.511	9828.55	1463.08	110.844	618.733	432.489	130.233	3667.7	1921.4	1974.81	2204.96	1071.41	253.033	71.0333	93.2556	554.9	466.778	7.07586	-18.1856
Endo-2	12905	4526.5	6905	0	45217.2	124.993	125.604	240.045	2295.45	241.022	3959.85	185.373	17402.2	1989.91	95.0746	1704.46	934.007	387.418	4064.46	2144.1	3077.36	2813.04	1444.08	1740.93	234.172	1435.62	580.306	101.709	9.40747	-17.7689
Endo-2	12906	4525.5	8641.5	0	27936.1	103.2	14.0846	0.346154	1125.18	100.508	9714.55	162.423	16464.8	1363.95	117.346	866.469	476.446	48.5077	2548.55	1128.02	2046.94	1634.23	1409.83	396.323	107.9	197.262	903.231	1568.63	1.38267	-16.7296
Endo-2	12918	4538.5	8920.5	0	19424.8	63.67	168.801	1271.7	4046.24	149.407	314.152	169.613	4461.33	2006.33	115.657	604.751	1340.98	434.791	3168.53	609.724	2774.3	438.027	3175.88	1420.03	163.35	646.822	708.663	38.0337	5.28436	-13.3235
Endo-2	12923	4534	10160.5	0	35589.2	81.1326	56.3591	136.481	1563.89	103.547	6851.21	128.58	7681.36	1600.32	97.116	291.547	852.508	208.387	2420.09	567.232	3540.66	1595.35	455.055	436.144	101.215	551.475	968.641	181.37	7.9325	-18.0198
Endo-2	12928	4528	10189.5	0	20296.7	155.192	85.8974	59.4487	1040.68	59.2692	5571.78	162.5	4532.17	1969.83	103.051	321.795	1143.78	193.192	2119.13	372.603	2299.97	991.872	672.756	693.718	83.7949	377.09	866.846	205.282	2.02044	-14.2181
Endo-2	12934	4531.5	8632	0	28853.4	120.776	11.9059	2.37647	770.447	19.2941	8098.69	137.753	20165	1252.87	104.624	809.271	421.647	10.6235	2505.01	1253.84	2275.75	2230.88	1034.12	370.2	81.8588	293.424	774.659	1579.13	1.90819	-16.4785
Endo-2	12967	4546	7426.5	0	31792.8	64.3698	117.156	100.594	2112.37	129.583	315.005	143.307	11763.8	1338.65	67.2917	683.052	88.8333	155.63	1625.34	674.12	1432.96	1658.21	829.146	639.609	144.484	1285.1	181.396	162.682	9.83864	-12.5129
Endo-2	13006	4555	6438.5	0	31849.1	108.593	3.61728	0.722222	2631.23	192.216	2423.17	202.654	11852.2	2503.79	578.864	138.679	41274.6	0.462963	13533.5	2583.15	3156.85	2152.33	153.988	989.876	180.006	423.735	33276	290.802	12.3564	-8.74975
Endo-2	13025	4563	8781.5	0	13810.6	105.473	124.824	188.572	3526.23	175.113	4491.08	258.842	6475.13	1590.83	93.3919	658.694	1098.48	284.689	3506.95	820.545	1989.09	1017.43	1090.34	1372.93	193.027	248.851	741.333	1569.32	0.0647883	-13.691
Endo-2	13031	4565.5	5418	0	20913.1	61.8927	25.2542	122.294	1250.69	138.181	474.028	105.175	14865.9	1682.34	86.8927	632.729	300.034	66.4463	1701.19	1217.57	1548.29	2285.06	4171.82	433.04	79.0565	2150.98	393.571	74.3842	5.95324	-14.7814
Endo-2	13032	4560.5	6452.5	0	27470.1	101.628	17.3269	27.3269	2882.31	223.66	2075.56	133.853	13386.8	1421.23	314.397	713.109	40514.3	8.98718	12079.4	2134.53	2961.92	2186.46	1015.6	993.513	990.051	379.878	14145.1	157.686	12.004	-8.72535
Endo-2	13055	4566.5	5567	0	37757.5	82.9603	24.3095	34.8413	924.191	62.8175	1247.44	119.373	8268.05	1472	60.8254	416.754	202.19	55.7302	1666.06	595.262	3110.08	1955.46	214.556	310.667	95.9921	588.952	421.643	80.0476	10.4003	-14.3011
Endo-2	13074	4574	9286	0	7595.31	107.095	108.077	1370.93	3920.78	505.059	11380.3	141.479	8161.7	1436.67	98.4674	693.29	1013.11	273.639	2432.21	1143.63	2243.74	820.911	1473.8	977.716	106.586	262.751	656.905	3385.4	-1.86272	-16.4588
Endo-2	13128	4595.5	5147.5	0	16385.1	93.8622	12.7778	45.3911	1723.54	157.387	3795.37	260.28	8432.26	1437.71	117.089	570.876	214.649	168.058	1794.88	694.24	2816.92	1204.18	846.08	727.529	106.951	83.3867	772.427	487.342	0.403771	-12.1952
Endo-2	13162	4599.5	3830.5	0	21756.8	54.4414	47.2621	1.77931	3137.3	97.0345	2471.59	75.2414	5357.03	804.345	53.1241	528.628	473.579	25.3448	1212.19	433.834	2003.83	1014.52	379.152	183.414	54.3586	92.069	1021.38	82.8207	8.23381	-9.58122
Endo-2	13176	4606.5	5028	0	22422.9	87.4944	1.48333	1.23333	1619.77	113.128	26.9278	126.661	6311.56	1959.14	136.572	186.972	1365.41	5.05	2816.26	914.867	2080.76	878.083	519.644	229.106	74.65	1061.87	1315.12	127.428	5.15663	-12.162
Endo-2	13216	4611	3836	0	32563.2	26.1505	3.78495	1.86022	4423.82	160.925	78.1398	86.1075	3566.85	949.215	50.129	329.441	558.731	24.0108	1540.68	792.85	3518.43	1081.14	910.516	189.108	51.5806	197.161	1019.88	71.6882	10.0317	-13.8798
Endo-2	13222	4621.5	6047	0	25412.9	59.5972	20.545	32.3318	2300.9	116.801	6968.64	123.128	12078.4	1369.91	80.9099	895.209	444.218	155.829	2585.71	2388.97	1778.18	1259.36	2051.1	707.488	133.318	120.791	409.768	346.512	1.51456	-15.6707
Endo-2	13232	4623.5	2999	0	29853.1	83.36	134.453	862.367	1845.99	345.96	825.353	83.6867	14733.7	1872.76	54.12	1702.73	1240.31	605.22	1638.05	2800.99	2244.45	1502.88	3300.81	2145.62	225.54	6145.08	864.313	107.033	6.91937	-14.7442
Endo-2	13236	4626.5	3065	0	16828.6	94.8492	20.3166	6.86432	4706.59	206.749	1759.64	199.372	17916.8	1518.9	50.8191	769.889	78.6131	32.9849	2440.62	1359.06	2937.35	1693.82	3069.04	986.869	182.905	645.497	428.055	451.312	4.99911	-13.8371
Endo-2	13258	4626.5	6687.5	0	26278.7	81.6283	5.81416	11.4071	1688.77	91.1858	3034.18	95.7611	13944.6	1434.85	63.7257	1081.53	389.416	52.9469	1440.96	745.018	1743.84	1631.55	762.717	503.354	81.531	330.805	630.336	104.434	8.4272	-11.223
Endo-2	13276	4637.5	5523	0	51615	78.8865	224.546	1887.87	3037.84	396.553	1876.17	160.716	27400.4	2012.3	77.9078	2355.39	257.957	1036.81	2958.99	8061.68	4416.77	1513.11	407.149	702.184	211.929	6053.82	638.652	111.511	11.3478	-17.6707
Endo-2	13327	4650.5	3552.5	0	36142	78.0988	71.0556	20.2037	2249.43	205.926	813.63	218.525	4872.75	2014.7	155.833	309.444	1643.05	59.6358	2999.89	1416.53	2861.93	1542.39	1283.82	869.074	64.1728	753.395	7436.56	120.302	9.40873	-15.1543
Endo-2	13335	4656	3752	0	25467.7	92.9023	60.954	22.0862	3269.91	354.488	972.328	334.144	10352.6	2414.28	116.77	267.828	17426.4	12.7011	6103.99	1469.49	3122.64	840.644	461.494	2247.69	181.397	913.73	33045.2	164.04	12.2402	-9.3753
Endo-2	13338	4653	6098.5	0	23847.8	57.0926	28.287	61.7222	3640.63	101.741	4300.73	102.009	20504.3	1423.71	17.8981	1544.97	224.787	62.537	2275.12	1002.14	1356.42	1001.66	1764.47	469.333	74.25	97.0278	75.6296	206.843	2.66698	-14.3614
Endo-2	13363	4662	5761.5	0	19810.9	58.7917	2.8	0.508333	1673.47	46.9583	2294.55	97.9083	13857.4	1385.89	70.5583	1104.28	179.133	116.55	2261.07	1598.35	2171.51	2052.88	1191.17	340.483	40.6583	672.758	414.433	140.042	5.78897	-11.0482
Endo-2	13365	4661	5563	0	14442.3	77.9737	142.482	36.3684	3291.26	179.974	4725.5	156.43	8662.31	1594.64	98.3421	628.43	426.088	192.974	3513.99	1437.85	4044.71	2002.36	974.14	704.553	147.64	148.281	370.553	203.895	1.40638	-14.2873
Endo-2	13385	4671	3777	0	16745.5	79.1122	1.10714	0.816327	2061.12	102.495	4867.68	76.2143	7264.81	1566.98	95.8826	73.0459	15826.6	0	6849.94	1261.73	2567.58	1610.85	771.49	319.974	48.9082	271.985	16528.9	123.133	0.0271783	-12.7972
Endo-2	13390	4672	5510	0	32424.5	68.3034	80.2977	208.388	3226.16	150.191	78.5112	163.067	11753.4	1681.13	82.5225	602.41	203.584	88.7472	2162.89	718.152	3693.46	1540.63	433.213	773.596	178.084	2426.65	342.899	90.0225	9.69117	-14.545
Endo-2	13423	4686	5506	0	35041.5	37.5374	69.2757	175.145	2785.56	118.85	230.369	148.963	10811.8	1256.47	57.1495	695.963	243.57	80.4533	1603.56	586.827	2168.91	2059.12	556.187	781.402	127.692	1399.53	378.042	95.4299	10.509	-13.393
Endo-2	13429	4687.5	3527	0	19443.6	58.639	5.30244	0	5259.86	274.941	388.483	173.015	19373.4	1554.79	469.727	163.127	3073.55	0	4323.92	1834.57	3310.7	2704.73	1535.17	627.434	161.605	285.576	15846.7	131.327	6.73415	-12.2222
Endo-2	13450	4684.5	5456	0	29993.5	46.9275	71.0145	177.362	2882.35	163.188	5733.25	243.087	10149.4	1569.49	87.9855	576.42	392.768	274.174	6673.09	3882.72	2638	2861.38	3008.58	1028.16	181.101	242.681	360.377	513.29	6.59646	-17.0046
Endo-2	13477	4700.5	3992	0	26318.1	84.0649	91.1558	112.983	3940.33	311.255	1207.84	330.87	7384.95	1883.01	340.42	509.991	683.199	167.693	3944.34	1557.39	2487.51	1229.2	2620.82	2119.77	207.087	1708.36	3229.7	135.078	6.52333	-14.035
Endo-2	13490	4702	9814	0	32463.6	70	138.616	159.981	2385.41	130.962	7932.69	104.736	8231.59	1769.64	61.7107	628.73	1394.96	293.755	2782.38	930.346	2028.46	2685.87	916.887	453.83	57.1572	293.421	1113.5	1004.65	2.39492	-16.818
Endo-2	13545	4720.5	5431	0	36154.9	101.778	135.689	87.5269	1777.22	127.275	9026.31	152.527	6642.26	1626.04	66.8862	562.916	269.395	416.395	4007.1	2535.38	2185.4	1756.57	2388.37	306.054	53.4192	97.9701	429.892	2971.26	5.57266	-19.4778
Endo-2	13551	4729.5	2442	0	24643.6	51.2509	43.4311	41.3852	2521.84	73.7809	3111.35	95.0671	12062.2	1116.31	79.159	839.219	266.06	168.784	2326.17	626.537	2543.67	2449.84	1425.44	228.428	69.9293	1867.18	491.788	362.272	3.70162	-14.6631
Endo-2	13571	4730	5160	0	17125.2	82.8966	44.4885	10.5402	10012.1	66.1322	4352.65	150.983	14410.1	1336.47	76.3161	1618.13	321.167	182.046	2151.9	1612.92	1962.48	2231.88	2478.58	409.017	89.8276	574.776	564.931	567.891	1.53547	-12.9888
Endo-2	13576	4734.5	4137	0	15302.2	95.1979	298.438	67.599	6491.66	249.682	4801.48	303.505	47253.1	1545.29	224.51	3454.31	517.797	389.458	3040.39	1226.77	3213.06	2265.13	1581.22	1290.33	205.849	71.5573	768.708	1455.01	1.19784	-14.3044
Endo-2	13632	4749.5	6020	0	31438.4	37.3194	37.1019	34.7731	2256.28	102.106	657.338	151.588	8114	1445.11	109.806	438.745	310.912	110.106	2339.38	1437.63	2106.3	1183.47	1867.64	408.657	81.4167	191.671	770.218	143.486	8.67353	-12.7722
Endo-2	13641	4751	5530	0	34985.4	109.352	88.0864	42.2407	1343.36	101.907	7973.35	101.951	9270.15	1440.29	69.0926	625.512	417.049	120.302	5662.85	3446.54	1701.87	2620.43	1469.43	408.889	112.383	270.105	444.469	829.975	6.57084	-18.6014
Endo-2	13648	4748.5	2442	0	23873.9	51.3333	74.5	92.6377	3066.5	63.8768	2991.67	111.188	8917.77	1605.09	101.725	753.841	519.333	136.507	1528.81	905.29	2262.76	1797.46	1879.97	360.609	86.3551	2308.21	516.435	377.942	3.84342	-14.3854
Endo-2	13671	4756	5750	0	19845	49.0922	52.8014	19.234	3979.45	33.4397	59.4184	124.17	2798.54	1394.89	35.7234	247.461	418.043	102.376	2702.38	1411.77	3922.64	119.035	1980.7	557.099	58.461	2957.84	370.057	83.6383	6.30719	-13.2024
Endo-2	13689	4763	5522	0	33235.4	131.63	74.5802	44.037	1597.64	129.136	9247.02	101.154	6868.4	1775.34	68.7654	604.426	512.778	102.691	4229.59	1610.49	1983.64	1836.39	745.636	342.679	80.4753	176.531	413.179	988.278	2.22667	-16.964
Endo-2	13709	4762.5	8109	0	41076	68.2558	55.5426	2.89147	2036.71	107.008	3450.75	180.008	8468.83	1296.09	87.4651	737.829	135.411	204.643	2733.34	639.318	2434.47	1470.18	309.287	776.752	102.078	697.767	569.992	213.736	10.1864	-15.5129
Endo-2	13772	4786	4010.5	0	17363.9	101.853	4.59887	20.2768	3168.22	151.96	2503.36	166.22	6718.35	1132.78	32.2825	211.689	509.638	4.70057	2152.6	976.52	1979.1	1745.1	1311.67	873.667	122.559	234.164	484.475	90.2655	4.71198	-10.7649
Endo-2	13778	4782.5	5088.5	0	22656.9	54.0741	1.46667	5.00741	2367.31	130.207	4176.38	171.637	18655.8	1624.14	128.578	714.993	172.126	243.659	5143.68	859.881	2369.71	1703.9	1095.59	292.696	134.185	607.585	638.541	1174.07	2.50649	-14.5734
Endo-2	13815	4790	7362	0	50453.5	107.143	117.238	123.286	516.952	111.889	9668.64	115.032	30210.7	858.238	6.34921	1953.7	15.1905	375.698	812.968	1072.46	1204.37	2211.92	727.476	689.46	113.111	789.889	57.5238	1495.71	6.95761	-19.4116
Endo-2	13848	4815.5	10401	0	27713.5	498.489	8.43525	607.036	1753.44	71.2302	1756.1	200.856	9865.15	1666.14	121.331	69.223	964.011	54.5288	2764.49	640.87	3110.78	1311.4	447.511	713.734	132.457	733.363	519.568	180.824	8.85699	-13.2438
Endo-2	13850	4814	7846.5	0	41730.5	82.455	26.2381	5.40212	1076.37	99.3915	4773.24	186.423	23527.2	1176.47	65.6296	1036.37	2060.65	83.9683	2851.15	1582.39	2295.9	2433.69	2196.29	668.074	105.788	194.042	1067.52	141.614	7.78155	-17.8977
Endo-2	13908	4821.5	5615	0	35162.6	93.8438	62.2604	45.75	395.76	44.5729	5458.35	100.677	15891.7	1260.95	65.1146	1081.77	477.729	291.74	1965.93	965.188	1277.82	2776.65	1746.41	396.75	96.5729	374.865	434.146	1207.59	6.8144	-17.9947
Endo-2	13916	4823.5	6315	0	23855.6	45.7059	0.784314	1.98039	3160.84	145.353	15.6275	85.0196	12822.1	1782.21	90.1863	737.304	1191.01	5.79412	3125.67	1082.51	2652.88	962.441	2047.84	323.304	81.951	313.353	771.49	97.5882	6.23058	-12.6434
Endo-2	13937	4828.5	5086.5	0	13896.6	58.5556	26.8222	32.8667	2746.59	84.4	10152	202.344	14153.5	1915.58	75.1667	639.256	94.5556	294.922	3070.19	4385.93	2159.02	2103.59	5217.93	508.133	121.289	154.733	534.211	457.944	-4.83995	-17.1885
Endo-2	13949	4836	5614.5	0	36379.8	83.629	17.6129	31.8952	465.621	60.6613	5071.27	89.6855	14844.7	1398.4	78.4597	1085.62	408.129	257.403	1731.31	1131.54	1659.77	2960.53	2300.16	263.718	84.5806	982.669	515.073	2811.48	6.85736	-17.8903
Endo-2	13962	4843	9602	0	39353.3	107.386	158.815	505.354	2702.52	195.508	2413.4	185.857	6414.68	1594.14	103.376	450.021	1017.28	222.196	2499.76	1122.25	2014.14	1431.53	853.82	532.809	101.138	1928.04	949.349	131.026	9.92015	-15.2846
Endo-2	13970	4850.5	8617.5	0	22708.6	104.509	40.7438	21.0178	3568.23	143.609	7603.05	137.922	13471.7	1456.27	97.6655	685.47	755.466	104.779	3056.5	1067.81	2432.59	1327.63	1451.78	823.726	106.324	160.708	647.772	1386.18	1.50321	-15.8912
Endo-2	13978	4842	9499	0	17820.2	98.8067	145.607	63.78	2110.92	133.847	5811.69	172.273	10330	1705.39	100.36	785.953	1924.99	376.053	2888.77	1100.38	2508.05	1736.2	1287.41	735.427	77.7067	1155.16	1058.09	161.4	1.41779	-14.704
Endo-2	14055	4871.5	8816.5	0	17340.7	78.8434	6.86145	0.795181	2127.78	195.572	1363.83	151.512	15668.1	1262.93	147.976	455.235	3382.42	16.0181	3903.01	917.994	2118.22	1119.42	746.663	1010.62	196.458	118.446	16401.1	270.904	6.5723	-10.1424
Endo-2	14079	4883	4306.5	0	16695	108.743	8.88889	0.432749	3672.79	186.661	1072.65	268.339	8862.21	1876.85	135.942	264.585	231.719	31.5088	4374.6	1291.74	3112.95	1244.39	2586.94	1183.54	180.556	1131.02	465.193	102.515	4.77412	-13.2257
Endo-2	14094	4890.5	7835.5	0	36670.3	95.7065	112.716	63.1592	1054.31	106.677	4602.27	97.4925	17844.6	1163.25	68.9304	1125.59	883.219	189.94	1554.98	1131.5	1566.22	2955.54	2666.54	530.796	116.488	327.189	687.861	3159.14	6.86719	-17.8387
Endo-2	14122	4893	7033	0	43824.5	87.4472	3.75155	10.7019	795.721	182.652	937.304	83.9814	20971.1	1405.51	94.7453	987.975	2446.39	5.68323	2320.72	1272.75	2089.75	3160.4	596.994	537.77	83.1988	1248.35	4974.14	84.1304	10.9567	-14.4521
Endo-2	14135	4900	2595	0	25633.3	64.6796	30	14.0829	3112.4	160.785	5346.7	105.956	14065.7	1500.57	76.1658	854.215	841.298	151.63	2706.77	376.177	2175.52	1254.67	1695.79	1102.81	92.7182	282.541	277.497	1122.15	3.05155	-15.1839
Endo-2	14138	4895	8464	0	31034.9	148.505	90.1936	35.5269	1391.11	79.4946	4863.9	119.118	14880.2	1600.35	43.8172	798.763	667.548	232.914	2017.83	745.527	2520.61	2007.86	605.785	1009.34	116.667	143.419	423.118	265.989	3.16072	-15.5538
Endo-2	14139	4908.5	8490.5	0	44746.5	98.2911	183.456	183.62	2995.31	164.46	3942.66	177.662	6706.86	1413.53	84.8861	672.363	754.873	251.354	3989.74	1120.36	3475.74	2290.97	628.827	1086.51	125.654	131.553	688.721	889.675	9.64248	-17.3269
Endo-2	14151	4900	8451.5	0	38087.2	67.3	217.944	382.178	1334.14	175.278	5841.88	121.233	17826.3	1712.39	51	1317.66	397.267	416.656	2216.84	688.678	3436.81	2976.12	880.356	1189.1	140.533	249.956	280.389	427.133	8.4766	-17.7098
Endo-2	14169	4909	4079.5	0	24822.2	35.85	82.9	43.825	2190.95	122.45	37.5583	238.875	2367.72	1590.43	135.95	249.333	781.842	180.025	1842.15	356.792	1879.63	172.383	319.175	611.025	141.842	264.992	420.567	74.3	7.32794	-10.8907
Endo-2	14177	4915.5	8461.5	0	52914.5	109.269	182.814	207.596	1785.39	88.4039	3186.81	153.59	10578.6	2040.3	93.7244	948.365	730.167	292.654	5388.79	1920.37	4821.33	2301.25	1966.41	1111.39	172.821	391.878	534.314	208.564	9.5179	-18.6474
Endo-2	14191	4917	9600	0	34243.3	387.504	9.41085	1423.29	1463.93	160.899	218.605	147.938	7545.3	1348.82	71.0078	131.248	776.318	86.4884	1701.56	607.512	1627.24	1395.12	362.155	574.186	54.5116	1078.77	748.915	92.2713	9.29402	-13.0019
Endo-2	14243	4935.5	10099.5	0	16299.8	148.438	111.657	525.567	1646.7	80.5112	1385.78	178.854	3383.15	2221.69	145.202	361.444	1849.73	267.393	2746.03	471.404	2404.56	574.921	908.382	1753.2	213.101	327.067	819.966	274.483	3.96077	-12.5828
Endo-2	14253	4940	8096	0	40886.2	75.8102	53.6481	16.0093	1438.44	188.611	1720.86	188.801	18536.4	1663.55	71.3056	1357.16	1228.7	184	3670.42	1248.94	2776.41	2950.91	638.523	1210.11	155.148	2941.95	698.977	179.333	10.5748	-15.5593
Endo-2	14276	4952.5	9158.5	0	44228.7	111.638	190.778	357.097	1436.88	68.4058	2844.48	137.193	6241.21	1876.58	84.6087	772.266	893.019	476.256	4101.62	1404.43	1933.51	1410.61	2502.61	498.01	88.5556	2478.65	485.13	119.237	9.58554	-16.2471
Endo-2	14304	4961.5	6807.5	0	41765.6	91.1515	0	7.69264	1883.04	260.515	2460.42	138.701	30455.8	1269.75	85.2987	1971.98	682.645	4.61472	2453.63	2009.8	3511.32	2405.15	2168.11	775.641	210.944	1818.26	2514.21	270.732	10.0043	-16.4433
Endo-2	14317	4960.5	2539.5	0	23680.8	73.2367	159.295	1767.78	5236.59	263.628	6161.88	216.507	6089.08	2065.87	106.188	464.667	1135.31	84.1836	4044.33	1044.08	3937.81	1721.96	5919.74	1977.17	201.372	489.053	688.222	1347.12	4.94645	-16.529
Endo-2	14319	4962.5	9141.5	0	37814.1	122.914	115.455	192.961	5737.83	140.365	2652.01	123.399	4779.3	1928.08	72.3391	548.455	1132.77	257.309	5051.93	1256.63	2578.35	1376.71	2106.73	743.923	96.8884	1930.84	461.987	154.953	9.22023	-15.7912
Endo-2	14359	4972	9685.5	0	23149.7	134.863	10.0571	32.7486	1811.73	123.8	4373.15	136.571	14756.3	1358.26	64.9086	427.96	1059.7	46.4629	2407.29	1225.71	2291.2	1805.88	1677.01	570.56	80.6571	591.971	744.029	1223.64	2.89371	-14.7379
Endo-2	14371	4976	2524.5	0	25631.9	63.6384	28.8475	1175.16	882.181	99.5876	2385.66	79.661	12267.1	793.712	50.4633	615.701	438.486	65.6554	1723.33	1101.26	2018.29	1143.97	3073.79	618.791	95.0565	509.469	662.446	231.734	7.09812	-13.4212
Endo-2	14374	4975	6235.5	0	27909.1	54.2043	18.4409	111.613	944.602	95.5914	3177.17	85.3656	15866.7	1200.09	54.0968	1349.16	358.333	109.355	1153.94	429.355	1596.96	565.355	636.871	429.194	42.7742	76.7419	192.323	464.602	8.49023	-11.0059
Endo-2	14381	4985	8439	0	45189.7	88.5367	125.305	31.1776	1844.65	143.17	4099.16	127.255	7205.82	1477.97	75.5367	566.019	638.181	151.247	3991.29	1827.13	2618.48	1662.93	1127.57	522.328	142.004	355.17	594.741	386.992	9.52689	-17.2702
Endo-2	14392	4995.5	10001	0	44514.7	102.936	133.886	261.648	2658.48	241.904	5462.67	165.979	5356.98	1561.63	83.2633	591.598	952.701	553.498	3062.54	1059.97	2122.88	1260.39	1501.36	789.178	113.121	1906.48	668.406	435.861	7.79001	-18.5248
Endo-2	14394	4987	3777	0	21184.6	52.6994	1.91411	1.27607	4110.39	304.785	428.227	162.178	8883.41	1530.42	177.693	68.5951	8143.81	0.0122699	6691.72	1474.81	3372.02	1399.8	347.429	932.675	210.245	327.104	20925.3	42.9264	11.655	-9.5918
Endo-2	14399	4996	3794.5	0	38980.7	62.5929	14.087	0.264822	2568.13	125.949	1438.83	132.368	12077.6	1568.81	84.0711	198.391	4886.96	2.95652	5001.78	1298.69	2744.26	1732.47	438.968	669.466	130.348	390.953	19275.9	109.628	10.6703	-14.2485
Endo-2	14401	4991.5	8021.5	0	48256.8	175.918	61.5965	50.2281	3238.77	260.544	1486.58	196.591	25957.6	1635.91	99.2749	2279.09	4197.81	92.2866	3640.48	1713.7	3017.31	2796.64	1224.52	961.444	142.942	4513.3	5552.74	103.813	10.8057	-16.9701
Endo-2	14408	4994	8981	0	20268.7	107.565	41.7468	16.0717	1666.06	56.0211	1239.03	193.257	4317.68	1911.85	100.435	372.81	1217.64	159.148	2556.83	911.013	1820.67	427.359	2466.33	1548.4	154.789	1352.2	565.578	280.506	5.29449	-12.8093
Endo-2	14418	5002.5	8033.5	0	32938.2	139.432	104.256	48.9207	4578.1	201.612	1573.04	175.956	14431.5	1557.55	98.7489	1536.73	966.273	143.022	3215.78	1237.14	2138.01	1968.86	1504.87	815.52	130.661	3492.86	625.079	119.727	9.87414	-14.743
Endo-2	14422	4993.5	10767	0	25270	56.7222	34.8889	10.2778	994.111	72.5278	5220.51	120.917	4689.76	1137.57	65.2083	103.347	532.792	38.0278	1453.18	447.167	1714.61	1040.62	1339.86	539.764	77.8056	153.319	361.375	254.042	2.96141	-15.1537
Endo-2	14453	5013.5	8014	0	34647.6	128.277	30.5319	10.2085	4225.71	224.085	133.757	110.098	20102.3	1196.8	66.0894	1559.42	2896.62	49.8851	3734.05	1470.61	2824.36	3041.1	1083.62	619.672	106.528	3900.63	4163.5	93.5575	10.9117	-14.304
Endo-2	14468	5008.5	8394	0	53018.5	205.406	158.449	65.9275	2350.55	429.333	3906.33	264.507	15350	1629.62	131.725	952.652	997.71	348.333	5936.64	1831.1	3435.32	2115.58	1659	1034.94	119.29	1446.32	618.362	2576.01	9.74966	-18.1814
Endo-2	14485	5022.5	9115.5	0	15129.8	132.516	169.977	130.307	2923.64	147.381	4563.97	201.707	8331.93	1981.03	128.377	863.061	1048.78	336.609	2387.27	511.409	2869.99	1136.57	1072.88	943.898	104.73	93.2884	428.502	690.544	1.62967	-14.1272
Endo-2	14532	5036	8284.5	0	32394.3	93.0944	65.8389	101.133	3818.28	244.183	2313.16	136.372	8715.79	1172.61	79.85	469.756	635.111	116.594	1729.52	568.333	1549.18	1056.86	450.989	519.856	96.9778	366.517	498.372	779.333	9.85992	-12.641
Endo-2	14547	5041	8101	0	18171.5	122.154	40.4695	2.61649	1806.06	102.14	7847.6	161.81	22923.8	1661.72	116.882	1663.2	1527.07	152.011	3832.19	1117.86	2961.47	2433.57	454.237	1014.31	150.14	524.298	854.201	314.437	1.15407	-15.5568
Endo-2	14557	5041.5	9492	0	43435.2	135.925	116.177	112.973	1324.35	72.9524	4027.05	148.435	6744.43	1528.36	71.0952	586.809	5309.73	221.639	2633.68	969.762	2071.36	1463.13	1027.48	342.442	60.5714	231.476	6917.82	5020.71	4.52406	-19.1889
Endo-2	14565	5038.5	6779.5	0	28667.6	36.04	0	0	750.973	163.373	1457.39	84.8	26636.2	724.44	38.0933	657.227	239.16	4.08	1012.49	919.28	1933.21	1463.03	244	315.933	52.0533	41.9467	637.04	169.867	9.25702	-10.2647
Endo-2	14599	5053.5	4133	0	24051.5	53.1812	3.53623	0.644928	3049.43	71.9855	104.152	98.8986	3253.75	1664.64	139.536	46.6884	1661.02	0.746377	3621.64	508.558	2105.49	453.978	370.304	231.406	54.6739	276.993	9166.38	129.587	7.25556	-10.8553
Endo-2	14603	5052.5	7313	0	43693.6	115.032	80.6882	56.6667	2928.34	164.527	599.204	238.613	11595.4	1481.3	36.1183	640.871	2825.85	133.731	3486.74	1816.96	2032.15	951.118	2319.77	1271.4	194.376	250.946	139.495	66.957	9.9006	-15.8642
Endo-2	14634	5067.5	9498.5	0	46383.4	120.738	137.821	234.964	2553.47	203.054	2007.76	176.006	8387.35	1506.27	65.7619	640.899	297.518	299.589	2705.29	1058.1	2454.08	1237.28	972.482	1174.61	98.6071	2254.57	204.31	604.97	10.3301	-16.3412
Endo-2	14638	5064.5	4469	0	24790.8	110.756	34.4878	13.9024	1175.77	191.439	8402.62	274.683	20804.8	1429.67	67.0081	960.618	321.219	214.789	3660.55	1680.79	2145.42	2002.21	1360.71	863.577	125.382	1573.11	270.081	129.602	1.52657	-16.1328
Endo-2	14642	5075	8074	0	15994.4	123.746	101.563	36.4813	2839.79	133.328	7692.56	152.437	30376.8	1691.3	113.403	2334.21	1715.92	300.914	3573.78	1414.56	1991.12	2080.6	841.884	938.489	166.448	294.489	953.765	325.075	0.328402	-15.3573
Endo-2	14662	5076	4093.5	0	29479.4	71.6786	2.09524	0.369048	2501.8	76.0357	3.56548	105.315	11232.9	1303.44	98.2738	877.411	1113.67	8.96429	3449.85	559.387	3128.89	1059.3	675.607	138.887	62.0179	132.036	8829.28	89.9643	9.65014	-12.5409
Endo-2	14671	5083	10430	0	16615.1	90.7991	169.521	163.863	1715.78	60.3607	4050.41	116.973	4042.71	1818.4	108.014	353.813	1067.75	211.931	2441.35	635.986	2153.21	990.616	1131.81	528.192	103.352	143.05	709.945	420.772	1.7822	-13.9238
Endo-2	14686	5080	7353.5	0	45568.2	113.757	176.357	65.2435	3691.61	131.8	463.209	173.313	13733.3	1621.07	114.565	756.904	2128.05	288.661	1818.58	767.443	2258.88	693.757	1584.88	1199.44	109.635	1074.53	1791.38	106.183	10.1986	-15.8534
Endo-2	14697	5088.5	7370.5	0	21946	136.632	164.911	134.079	4227.46	216.3	1091.75	236.663	13296.5	1746.13	68.7421	795.284	1653.81	209.395	2182.26	902.132	2365.41	911.611	1405.99	1267.8	156.595	801.111	201.474	122.458	5.09872	-12.7347
Endo-2	14708	5086	3760	0	16972.6	66.4505	15.2342	1.31532	1445.59	80.1531	4986.33	133.333	12753.4	999.694	34.8468	753.64	2049.64	13.2432	1866.25	1543.75	1481.7	2031.8	2499.89	184.315	54.6757	406.748	7096.18	2108.06	1.16987	-13.0358
Endo-2	14770	5110.5	7450.5	0	31800.7	62.3333	90.3854	58.9583	574.536	83.75	90.0938	95.4479	22991	1271.1	51.2969	1180.01	549.516	244.969	784.016	384.88	1815.35	751.266	1164.2	651.057	118.391	128.792	382.74	83.6562	9.64314	-12.5255
Endo-2	14771	5107.5	7694	0	47628	114.497	191.648	99.8	1855.19	129.848	1924.58	168.564	16851.8	1416.86	66.1455	1213.39	423.77	353.885	3652.04	827.255	3252.02	1217.64	735.545	677.655	91.5879	609.109	407.727	946.594	10.234	-16.7325
Endo-2	14780	5113.5	5995	0	29125.6	64.9323	0.359375	0.59375	1847.45	161.448	530.599	184.25	18635.7	1639.13	105.099	523.01	212.833	34.0312	2894.8	1133.8	2134.79	1131.15	1086.97	556.578	123.302	115.859	1087.08	101.156	8.79882	-12.1165
Endo-2	14786	5118	8244	0	44467.3	95.3286	76.6476	37.0952	2026.52	107.181	1071.51	133.743	9529.98	1511.01	89.2429	605.471	882.095	200.124	2990.21	1278.28	2764.41	1607.57	1365.77	946.186	120.476	1108.4	647.776	160.024	10.2437	-16.0498
Endo-2	14793	5116.5	10395.5	0	12918.1	90.955	123.04	109.3	1617.53	101.795	5239.47	139.78	6459.74	1676.31	95.5	400.6	1074.46	255.585	2551.07	557.115	2108.84	1696.28	941.89	603.78	91.065	104.675	737.895	1076.49	0.173454	-13.9422
Endo-2	14797	5115.5	3729	0	15150.8	82.1288	30	12.5909	5353.94	202.174	1735.87	290.265	10328.8	1907.82	75.0303	470.939	5052.17	2.77273	4515.12	1436.24	3216.3	786.47	1667.67	1405.14	125.098	527.485	8970.85	87.1515	4.34359	-12.4337
Endo-2	14836	5132	6663	0	31751.2	47.9415	26.4444	93.2222	3443.42	249.708	794.667	191.725	8736.43	2246.73	116.596	317.392	1979.59	69.2515	3334.5	395.035	2317.12	734.135	624.678	1837.61	294.754	305.047	383.023	88.4678	8.26108	-13.8678
Endo-2	14841	5133	4800.5	0	219.258	66.034	2.45578	2.46258	3118.9	134.095	12129.7	139.959	4620.97	1068.08	119.17	114.912	732.837	17.5714	2578.44	1123.78	1419.41	668.49	571.374	635.932	130.653	112.469	6275.82	98.6735	-2.22768	-16.1364
Endo-2	14851	5137	2462	0	34758.5	71.1702	13.4752	9.20567	1442.19	94.2837	4692.57	80.4539	16104.1	1539.08	56.9433	586.489	515.064	78.922	2748.89	1729.01	2655.22	2780.37	3783.38	337.482	66.9929	661.39	895.05	161.128	7.00848	-16.9449
Endo-2	14871	5140.5	7637	0	2397.16	91.2781	167.099	59.1457	5258.72	189.662	11088.3	144.377	11830.8	1667.32	63.8344	1115.04	880.656	210.907	1704.91	912.378	1240.47	826.119	1414.08	697.622	99.3642	157.536	610.98	3070.13	-2.31395	-16.2052
Endo-2	14885	5151.5	10445.5	0	52211	77.9541	347.571	261.168	2070.16	164.76	5185.34	84.199	6407.97	1483.18	54.5102	633.291	813.194	578.357	3943.78	969.745	2319.3	930.959	3180.93	841.071	89.2092	109.531	795.337	3344.02	7.7977	-18.8815
Endo-2	14896	5149.5	6937.5	0	54083.7	117.512	55.938	46.5194	2276.03	208.023	5018.95	144.132	13526.5	1669.89	54.3953	1903.54	683.116	196.016	5941.36	3618.24	2281.29	3941.49	2429.01	900.093	173.279	624.481	678.388	2561.13	8.08698	-18.9362
Endo-2	14903	5160	10392	0	38015.1	91.0977	189.594	239.355	1760.6	117.312	6044.64	126.25	6145.47	1488.69	49.3008	513.438	744.598	358.484	2746.5	745.219	2362.02	1510.97	1053.02	299.516	68.9492	91.1719	704.414	663.125	7.20885	-18.4269
Endo-2	14937	5161.5	2421	0	26120	112.844	40.4082	85.1361	601.381	85.1837	242.15	55.966	14603.4	1633.28	78.8571	556.639	698.993	176.789	2065.01	492.932	2435.31	1298.27	2542.13	382.333	65.7823	372.279	638.225	87.9388	6.7154	-13.7161
Endo-2	14993	5181.5	2946	0	24380	71.6064	0.0886525	0	3943.03	206.667	348.16	130.972	21640.7	896.574	115.777	32.7447	733.06	0.0460993	3293.11	1605.26	2978.07	2503.25	1081.33	727.596	135.486	663.34	6564.18	221.521	9.47389	-11.398
Endo-2	14999	5179	4468	0	491.698	57.5866	87.9609	9.84916	2428.55	185.52	12584.2	146.307	10493.7	2163.04	178.765	514.045	1483.61	79.6536	2050.7	567.497	1935.3	1950.57	897.827	567.883	117.402	151.637	852.676	139.324	-2.35627	-16.2342
Endo-2	15022	5188.5	5002.5	0	4619.5	83	6.79348	3.75	2068.45	126.94	12604.3	224.902	19595	1108.06	54.0815	916.848	7999.11	55.1685	2310.97	1016.65	1085.02	2440.49	1491.57	447.06	128.652	43.8533	11193.5	126.011	-1.98104	-16.3934
Endo-2	15037	5189	4382	0	25422.7	96.2569	71.0208	13.6319	3198.25	175.257	695.556	302.465	21500.5	1962.88	145.215	1208.1	1220.5	210.812	1675.1	1008.9	3213.19	1837.65	1314.06	1203.1	221.771	1369.38	1331.24	119.569	6.85414	-13.9518
Endo-2	15089	5209	4500	0	51671.5	153.35	65.5424	36.8757	1626.31	202.678	3253.05	188.435	17528.5	2490.23	162.661	1027.11	713.814	155.638	2578.38	1249.63	2248.54	2748.71	4395.37	998.593	243.599	495.141	319.379	740.486	8.63989	-18.3059
Endo-2	15091	5208	2364	0	17918.5	35.3176	16.8716	86.0811	2622.66	65.2297	580.068	85.9865	19485.6	1736.57	84.473	1015.21	720.757	68.9459	3106.58	1147.35	4351.22	822.236	3258.53	232.48	49.3581	234.899	247.216	104.622	5.57475	-14.1801
Endo-2	15104	5216.5	6535	0	40255.2	53.661	76.0057	95.1695	3115.42	179.638	1409.79	119.13	27111.8	1436.88	65.5367	3332.46	382.91	529.079	3303.68	1250.33	2247.05	1987.25	1215.82	1023.32	118.418	391.367	377.034	87.7006	10.4	-14.7131
Endo-2	15127	5221.5	2359	0	20866.4	50.0936	15.6667	43.6433	2889.53	44.9123	813.433	73.9883	19689.9	1366.56	47.2164	953.047	422.064	47.4678	2709.57	1196.97	3629.57	791.076	3467.97	255.082	81.2281	133.895	291.918	65.8363	5.7608	-14.2471
Endo-2	15156	5231	4457	0	43769.6	87.838	178.931	141.685	3412.58	246.931	5146.13	344.241	16788.9	2399.28	153.245	1129.4	1610.18	245.236	3383.67	1583.12	2474.66	2353.99	3622.66	2013.22	254.829	1792.4	761.801	576.255	8.57526	-18.4606
Endo-2	15158	5228.5	4439	0	14053.3	116.515	67.7212	8.58788	2794.35	80.6424	14453.3	117.036	18805	1611.15	101.509	968.515	1091.48	77.7091	3903.58	2434.05	1877.19	2707.95	1924.08	526.448	95.6727	276.4	963.836	112.933	-1.28627	-16.8857
Endo-2	15163	5236.5	5305.5	0	34457.5	69.0143	27.9048	32.0857	828.995	39.4429	5251.85	105.619	6604.8	1391.78	76.081	434.186	378.538	123.124	2835.29	1303.44	1568.89	1994.92	1314.7	364.652	82.3381	183.133	545.133	3368.17	6.64173	-18.0662
Endo-2	15168	5235	4478	0	51495.5	131.963	223.598	230.011	3056.89	356.561	5302.31	451.825	9118.3	3123.1	192.376	770.561	1673.35	373.212	3103.78	1267.11	3240.1	1776.98	3239.89	2699.46	324.762	2873.42	420.09	188.376	9.22524	-19.1318
Endo-2	15196	5238.5	4460.5	0	48745.1	98.6173	190.827	141.852	1114.94	132.988	536.235	258.407	9200.05	1933.57	122.605	697.519	870.272	218.543	2018.58	643.63	2221.47	789.58	3805.85	1407.05	176.506	1163.26	633.593	91.0123	9.24781	-17.3812
Endo-2	15204	5247.5	7468.5	0	23500.3	89.8521	101.144	32.3813	2067.47	95.9883	1275.5	113.825	25158.3	1127.91	67.4436	808.276	2390.51	144	2874.12	1250.52	2291.25	1842.56	1388.86	490.366	110.191	1269.71	945.907	163.327	8.03083	-11.3735
Endo-2	15211	5248	6283	0	54333.1	73.1301	69.3496	44.439	1058.67	126.325	4819.89	49.1463	10922.2	1490.07	46.3415	1025.85	581.317	271.472	5199.5	1946.46	3220.83	3875.08	668.041	574.358	90.9675	135.943	338.894	578.992	10.0172	-17.6552
Endo-2	15213	5261	6714	0	31960.7	93.163	29.4819	47.8442	3257.49	179	2517.54	89.2174	14745.9	1645.86	95.0761	979.272	657.931	98.9819	5003.7	2635.25	2963.2	1671.22	2547.02	520.826	84.9746	199.087	432.688	1192.66	7.48761	-15.1294
Endo-2	15240	5261.5	3197.5	0	10972.8	49.2816	8.6954	8.1954	4163.92	161.236	1110.9	99.3563	8074.26	1803.22	101.213	300.408	1786.94	25.5287	3199.61	750.063	4013.06	790.989	2554.24	526.851	112.483	339.379	6269.38	350.695	-7.93358	-13.2797
Endo-2	15252	5259.5	3873.5	0	23189.2	90.8551	4.17391	0.652174	1899.06	195.551	1205.88	120.348	5263.32	1213.83	33.942	172.116	13391.4	0	3860.35	894.42	1823.22	1076.46	876.507	510.681	73.6957	157.246	13707.9	121.797	9.84426	-10.3495
Endo-2	15259	5264.5	2914	0	17990.3	70.3158	0	0.0438597	2076.88	135.886	35.2018	121.509	23900.3	859.482	104.851	0.815789	691.877	0	2793	1151.47	2869.02	3351.65	62.7456	624.219	133.921	335.482	32008.5	114.412	-3.68128	4.43922
Endo-2	15269	5268	5934.5	0	41918.7	20.9615	2.80769	2.02564	1884.49	125.564	2.78205	213.897	25967.1	1861.03	83.4872	1440	366.59	196.667	4571.3	1885.33	4099.99	2254.45	2994.74	1860.76	168.538	603.538	787.128	98.8974	9.25028	-16.5934
Endo-2	15270	5280	2922	0	26510.4	35.0241	0.421687	0.0923695	1019.51	92.6305	12.0683	100.213	11668.6	430.365	55.6064	0.060241	241.586	0	1897.49	1080.36	2284.94	1693.84	648.908	224.221	60.747	347.377	16996.4	115.297	9.96519	-10.0897
Endo-2	15281	5279.5	3813	0	26163	80.9211	6.32177	0.59306	4446.92	353.527	7385.27	253.148	29347.8	2361.75	7850.96	1782.99	6447.42	32.918	8904.13	2370.39	3947.23	4866.46	963.965	1653.2	279.744	471.107	14118.3	133.864	2.37805	-16.2893
Endo-2	15293	5285	3889	0	36558.1	62.9904	5.47847	1.24402	4238.01	148.66	2923.66	181.038	16253.7	1249.96	35.7464	553.699	15162.2	1.52153	4833.13	1080.84	2868.19	1744.48	621.368	704.684	158.1	670.919	12075.5	122.981	10.9118	-13.8567
Endo-2	15309	5284.5	2491	0	6748.75	100.222	5.7037	31.1728	2536.46	244.346	13071.5	121.309	9411.01	1647.49	106.519	88.358	1.49383	31.5062	3716.93	1671.99	2242.73	2186.17	1295.86	747.321	139.593	292.42	767.21	173.642	-2.02206	-16.4407
Endo-2	15310	5285	3848	0	18145.3	98.7417	0.0166667	0	6407.79	464.65	14316.7	346.958	43302.3	2049.47	5000.88	2668.38	1095.79	60.85	4253.34	2738.73	2866.18	4555.44	4284.61	1767.7	374.033	550.908	223.167	144.492	0.872714	-17.6759
Endo-2	15321	5299.5	3793	0	10733.6	69.6432	2.00939	0.0798122	4293.19	172.07	8458.35	156.235	30908.2	1414.57	5874.38	2015.89	1867.22	17.6103	3135.04	1445.18	2246.24	3075.19	2430.28	488.099	154.803	215.066	348.531	124.54	-0.809949	-15.5411
Endo-2	15325	5298.5	3853.5	0	7890.93	72.4673	1.9476	0	4652.19	343.476	13687.1	203.345	43170.9	2207.88	2747.27	3026.91	5524.76	18.1223	10744	3064.9	4076.34	4377.14	2877.73	1149.03	241.153	257.624	1940.26	154.314	-2.67584	-17.2358
Endo-2	15336	5302.5	2731.5	0	322.735	69.0189	3.4164	0.15142	3815.76	149.795	10224.6	154.924	17939.2	1539.82	101.129	503.489	870.653	12.9842	3962.77	1490.09	1934.06	3548.54	3146.9	762.297	169.435	342.524	1305.77	369.442	-3.93194	-16.53
Endo-2	15339	5301	3919.5	0	38154.6	193.219	6.06965	1.25373	4823.75	217.333	6577.06	196.905	21502.8	2340.5	96.9751	1659.02	16375.2	9.68657	7384.4	2233.67	5383.92	2672.92	3221.02	999.567	153.184	3211.06	13371.4	118.274	8.64158	-19.7525
Endo-2	15351	5305.5	2773.5	0	42015.5	119.528	0	0	1259.28	206.723	6412.06	165.277	16821.6	680.855	124.415	1432.85	415.516	0	5091.45	2105.66	2224.72	2706.61	1656.64	506.038	131.717	4841.91	1266.64	1941.3	7.4731	-18.8995
Endo-2	15352	5302	3830	0	10643.4	118.904	12.2034	1.0226	8424.28	527.22	14518.6	158.751	54333.2	3064.79	12821.9	7083.68	18034.7	121.689	17676.4	3067.8	6464.61	6043.75	2980.5	491.61	169.655	377.079	3981.52	145.096	-2.82413	-17.4547
Endo-2	15353	5303.5	3887	0	22325.6	74.8269	39.4295	0	9743.16	305.994	7563.58	274.192	28051.2	1226.82	93.7949	809.833	3784.43	0	6249.93	1958.51	3264.03	3255.92	3269.3	1637.77	188.269	363.212	3085.31	131.987	0.869472	-15.8981
Endo-2	15374	5319	4686	0	48519.4	51.6313	8.4495	11.1717	1323.67	140.838	1458.7	75.2929	17468.8	1398.01	66.4798	1483.47	545.838	57.8131	3434.95	1745.33	1874.19	2437.48	2821.07	250.237	110.869	2967.85	270.263	104.879	9.98229	-16.3095
Endo-2	15382	5314	3894	0	22347.5	80.1515	19.0727	0	5009.63	313.673	8301.72	197.273	32766	1095.46	151.23	1093.92	3019.85	0	4868.54	2227.76	2623.29	3267.95	4028.32	798.709	223.255	588.006	3493.4	117.879	0.791332	-16.003
Endo-2	15393	5325.5	3868	0	194.129	71.7333	0.435294	0	7393.41	271.475	11717.2	168.851	34529.8	2337.2	1527.64	2322.88	9258.13	0.129412	16844.8	3188.08	6041.39	4349.02	649.51	874.988	191.796	125.486	18225.1	113.984	0.104526	-3.04208
Endo-2	15395	5318	2827.5	0	48598.8	85.5079	0.809524	0	1124.3	112.762	416.611	126.024	8795.94	779.627	45.5	80.0079	138.611	0.301587	3962	1255.09	5584.82	1093.39	390.183	443.071	107.96	911.952	593.183	102.437	11.1776	-15.7529
Endo-2	15400	5322.5	3917	0	37483.7	90.525	1.0375	0	2902.06	177.067	6608.58	204.325	26533.6	1562.36	42.1167	1328.36	6946.27	5.7375	4443.63	1633.93	3179.34	2124.44	2799.61	757.154	95.725	1509.12	6648.37	70.0042	7.59888	-17.8249
Endo-2	15402	5315.5	2917	0	18115.2	109.676	0.460784	1.37255	1746.51	83.6765	997.363	78.5098	9672.22	1901.69	99.0294	143.422	1439.2	0	1784.43	582.147	2929.97	903.961	552.48	177.765	60.4412	304.049	2566.17	116.676	5.12157	-11.5068
Endo-2	15407	5319.5	3604.5	0	27193.3	44.8788	0.0505051	0.0707071	3879.48	72.4343	1.70707	68.4141	26645.5	1191.55	50.1313	2083.65	69.202	70.3232	3004.25	1270.25	2925.32	2111.87	4894.99	186.96	51.8687	1411.95	174.636	58.202	6.20023	-15.38
Endo-2	15412	5322.5	2819	0	53500.3	78.9339	0	0	1594.41	161.083	3432.04	114.983	25508.7	1429.15	75.1157	1877.17	1074.87	4.30579	5630.1	2560.46	6860.53	2409.41	953.397	601.628	112.306	1927.66	1210.95	115.876	10.0492	-18.7299
Endo-2	15413	5329	3985	0	28270.8	67.995	7.29293	0.277778	2610.03	217.803	893.904	209.025	9690.77	1603.97	68.1162	251.616	268.096	22.0253	2303.35	1532.78	1519.94	2225.75	2937.46	913.419	174.505	325.121	654.318	93.505	6.97988	-13.9627
Endo-2	15418	5329.5	7933	0	32931.5	82.434	84.2723	62.6468	2817.84	107.609	1263.23	112.604	6191.03	1460.43	71.7404	520.787	604.238	102.187	2439.82	740.604	2109.62	548.191	2321.05	759.064	79.2085	315.736	483.119	76.8426	7.94625	-13.9094
Endo-2	15433	5333.5	10085.5	0	13025.8	101.222	282.982	47.883	1733.95	51.8129	386.053	158.216	3567.18	1968.36	119.936	320.164	1383.01	165.129	2830.05	541.135	2805.64	481.912	637.918	658.69	103.556	299.813	827.678	98.5965	-1.14516	-7.36557
Endo-2	15439	5330.5	3606.5	0	35401.1	111.969	2.95833	1.40625	6748.77	85.5625	6.64583	90.9479	11278.2	1494.86	49.2917	785.979	122.719	24.3333	3485.42	1258.08	4289.71	1517.32	5254.49	416.865	50.6354	1854.2	287.771	84.1354	6.60252	-16.0063
Endo-2	15442	5344.5	2831.5	0	40662.5	60.642	0	0	2683.35	113.56	96.8093	109.031	25133.1	463.576	62.5292	149.634	528.704	0	4276.26	1357.5	4693.44	1675.31	612.79	573.525	140.167	1219.56	969.595	49.7082	11.0823	-15.0986
Endo-2	15490	5351	4692	0	55207	66.256	3.28019	17.3768	2434.15	157.816	1291.82	127.169	21473.8	1786.26	95.7295	1491.58	694.198	82.0435	6777.23	1914.14	3726.64	2897.47	2238.83	374	82.2319	8075.02	739.971	126.585	11.1281	-17.4113
Endo-2	15503	5350	10215	0	28872.3	78.1167	7.46193	137.812	3103.41	148.838	714.99	120.066	8056.25	1547.61	98.1624	236.924	5722.13	96.3046	3162.26	431	1893.92	792.025	1205.42	908.289	121.162	548.431	10356	160.218	8.54472	-11.9535
Endo-2	15505	5354	4513	0	10775	71.838	244.264	12.2176	7222.07	69.9074	576.069	96.2546	19082.4	1819.53	85.4861	999.662	608.792	71.5556	3613.95	1437.28	2994.99	1673.4	3504.58	143.194	52.5046	749.912	489.208	162.056	2.64516	-12.679
Endo-2	15521	5353	10098.5	0	19554.1	154.292	461.917	20.1389	2537.2	84.7083	767.694	192.125	7232.74	2013.19	171.201	343.396	1428.9	189.111	2778.61	667.75	3357.74	528.236	786.938	593.875	117.021	330.861	772.951	249.701	4.5363	-12.4387
Endo-2	15534	5363	6861	0	40209.1	89.2383	29.0383	39.9957	923.345	93.8085	4790	101.055	10043.2	1224.21	79.6766	529.749	630.123	54.3234	1391.97	503.838	1587.74	787.587	948.4	596.749	74.1362	191.702	609.136	2175.63	7.09655	-18.2995
Endo-2	15548	5359.5	2218	0	19968.6	89.0444	0.0333333	124.411	860.811	99.5889	5234.8	100.667	29580.4	1388.92	68.5	383.033	593.333	11.2	2953.43	1800.11	2792.06	1841.82	2124.63	213.522	99.8778	3307.34	1728.98	164.389	2.53525	-14.8139
Endo-2	15561	5368	2824.5	0	32684.6	69.9383	0	2.06173	3911.66	198.722	6181.38	187.198	38951.8	1074.05	72.4568	1463.98	317.87	0.0925926	4312.52	2679.55	3690.03	3981.65	423.179	945.685	267.735	132.074	1241.02	291.457	2.8457	-16.0221
Endo-2	15567	5366.5	7957	0	21298.8	46.7381	42.5952	15.119	2143.94	112.214	5188.4	154.405	10394.7	938.762	72.4405	667.845	876.619	74.2738	2336	650.226	1201.37	689.917	698.202	628.607	123.119	171.714	1290.65	0.761905	-0.166499	-13.6055
Endo-2	15603	5384.5	2819	0	23827.3	73.3615	0	745.85	1790.24	214.305	8619.8	146.878	24990	1199.53	39.5446	866.699	190.019	3.82629	3282.34	2126.51	2556.42	3633.69	376.07	542.69	155.596	3021.82	760.714	592.221	2.02743	-16.1005
Endo-2	15619	5384	6850	0	45414.8	73.2613	47.5779	72.0603	1335.55	179.809	7022.78	106.266	11561	1163.79	68.2714	753.116	665.065	73.6231	1312.77	620.588	1889.07	1279.63	1137.71	725.402	80.2563	207.387	743.874	1893.17	7.20137	-18.8666
Endo-2	15629	5384	10338.5	0	48350.8	126.348	108.878	196.148	1748.84	160.93	2648.55	176.609	3348.65	1406.36	103.322	267.052	908.861	384.122	4060.77	802.557	2305.22	862.261	1011.69	778.043	50.3652	95.0261	702.426	3698.29	9.4755	-17.3553
Endo-2	15638	5387	6819	0	32447.4	57.7629	30.2887	20.299	2450.99	87.5309	5687.99	113.784	10872.4	1090.7	76.5206	1041.53	549.381	244.428	1774.83	519.531	1452.99	1317.67	880.031	447.861	75.9124	215.68	406.052	1674.43	3.59956	-16.0174
Endo-2	15643	5391.5	3987.5	0	12978.6	69.3239	84.7557	122.756	2545.24	105.545	4337.39	88.4205	356.557	1841.59	90.8864	168.295	852.17	188.159	2816.48	1738.43	2450.53	472.847	3480.25	424.619	52.3239	497.398	734.165	82.9602	2.03631	-12.929
Endo-2	15661	5394.5	3935.5	0	21878.9	81.9699	0.566265	0.144578	1776.37	225.566	2999.83	262.193	9397.58	1290.13	105.988	309.024	612.94	1.98193	3671.2	1358.95	1750.25	2135.86	1390.79	761.843	208.048	1184.89	1128.62	127.042	3.46766	-14.1428
Endo-2	15681	5405	4656	0	29139.5	87.2686	85.1543	25.0229	1234.88	85.76	7317.5	107.771	15626.8	1340.85	70.4457	1506.62	276.011	278.12	5703.72	1414.43	3481.98	3720.79	728.914	429.446	103.04	3068.49	540.903	272.669	2.55367	-16.0827
Endo-2	15699	5410	3967	0	22481.9	96.6178	24.8482	9.0733	1894.57	117.56	8857.35	156.696	8229.93	1698.73	125.838	135.613	746.979	104.691	2276.31	445.429	1413.31	839.55	412.105	541.895	98.5497	642.958	882.764	115.23	0.217196	-16.2161
Endo-2	15715	5414	5194.5	0	27409.4	84.3235	9.72353	12.9647	1687.46	100.9	54.5765	91.2294	5872.76	1566.72	52.3353	452.776	175.641	190.788	2113.51	654.165	1841.82	804.941	1217.94	261.488	87.8588	888.453	290.406	54.9412	8.58239	-11.7644
Endo-2	15720	5422	4663.5	0	42394	133.397	28.0684	25.2051	2840.35	137.321	2503.34	150.073	25997.2	1376.4	86.094	1724.21	444.35	166.068	5249.11	1755.74	2843.3	4906.92	972.308	716.906	122.774	1629.01	781.966	275.09	10.6105	-16.8047
Endo-2	15723	5414	9562	0	21202.3	81.025	13.9	19.5333	2603.6	154.242	1509.57	84.2083	9747.57	1547.47	41.175	654.967	3939.48	11.7583	2031.32	725.717	2489.37	1771.92	729.642	300.675	92.5833	346.483	1058.36	171.425	6.09617	-11.1172
Endo-2	15729	5420	9969.5	0	38429.4	69.2639	83.3657	49.9583	2571.01	124.042	2033.58	128.5	4533.4	1732.38	46.2083	287	752.606	117.741	2805.4	900.315	1971.15	1410.75	1571.83	745.417	140.083	2687.41	286.833	157.88	9.8593	-15.0946
Endo-2	15747	5426	3014	0	13961.9	206.861	3.20285	50.5516	2918.49	128.609	2737.11	126.587	11156.2	1411.5	103.071	372.577	9632.76	18.1815	3172.82	2296.57	3407.91	1946.99	1666.34	361.73	145.655	1059.57	8883.11	515.363	1.06292	-11.1783
Endo-2	15753	5427.5	9939	0	36632.9	63.0826	21.2397	7.57851	1385.16	91.0124	3125.71	151.467	8592.08	1537.05	68.7273	356.343	632.165	111.161	2340.6	1066.8	1753.33	1863.87	1475.46	634.112	140.31	1933.37	1660.95	182.864	9.93377	-14.4406
Endo-2	15802	5443	10422	0	23280.9	71.0559	33.4099	11.5217	2954.85	102.547	438.484	130.28	4485.92	1246.4	75.5839	148.335	839.019	219.398	2493.86	385.913	2622.73	880.304	1419.61	637.491	92.5155	138.447	739.727	94.913	7.39261	-11.7356
Endo-2	15845	5461	3636.5	0	4717	86.1522	56.0696	18.9174	2595.16	95.5087	11519.2	111.348	8567.68	1744.43	77.4348	961.856	467.739	170.17	2733.58	1096.27	2383.68	2354.87	1292.88	233.496	58.5565	342.183	742.278	122.639	-2.22943	-16.2596
Endo-2	15848	5458	5855	0	27748.9	90.8426	0.773148	0	1238.56	79.2176	3.13426	104.537	8239.31	818.449	90.2685	157.468	447.259	9.26852	1379.79	574.509	2566.03	954.569	114.343	151.917	43.6898	280.898	715.616	96.6018	9.19074	-10.4132
Endo-2	15857	5458.5	4521	0	22233.1	98.6226	188.126	133.956	2078.52	106.711	38.2264	126.56	3436.08	1762.42	84.0692	310.736	935.006	109.78	3411.28	1694.48	4463.88	403.811	2381.87	435.78	92.3019	2620.94	490.673	99.7925	6.33021	-13.8741
Endo-2	15877	5469.5	4480.5	0	43017.8	77.5149	84.3317	57.0248	548.04	78.8861	1324.81	113.099	17404.7	1366.49	62.599	1036.85	470.733	92.2129	2252.14	1275.54	2735.36	3175.32	2318.19	240.158	58.9901	1260.73	586.619	813.213	10.1723	-16.4326
Endo-2	15912	5480	2373.5	0	35149.1	66.358	2.16667	23.1667	7133.7	176.142	562.519	209.568	19889.7	1217.86	49.7037	318.401	853.957	12.4321	3729.39	1180.14	3918.81	1948.59	1380.56	783.216	157.426	218.21	2567.88	85.321	10.2258	-14.8925
Endo-2	15914	5478.5	4350	0	10750.6	145.333	28.4295	21.391	2081.87	116.603	565.436	123.532	15575	1652.13	86.0897	803.071	686.077	72.468	2908.52	1266.83	2272.53	997.577	1396.7	347.737	83.8782	189.679	216.692	121.071	-0.160137	-8.56458
Endo-2	15931	5482	10133.5	0	30349.4	119.323	422.413	2937.42	9186.11	467.646	9127.81	104.794	5716.64	1643.37	63.5661	566.349	872.767	362.725	6006.99	3969.02	3245.52	2056.67	2220.48	563.434	50.0635	91.7249	767.259	4708.96	1.65936	-17.081
Endo-2	15968	5498	7451.5	0	39985.5	73.5402	128.023	146.851	1392.28	153.023	897.121	113.787	21598.9	936.897	42.4598	833.063	288.931	336.931	2972.33	1014.82	1925.58	2117.55	961.569	886.092	98.5862	1337.23	754.822	73.1264	10.7859	-13.983
Endo-2	15975	5498.5	7632.5	0	41777.7	104.533	3.82424	15.1212	2037.66	188.121	5827.09	200.376	12144.1	1172.02	66.5879	611.933	2388.2	119.612	3252.73	730.782	2570.13	1655.62	972.945	1048.72	106.358	702.606	3621.96	1315.53	7.46733	-18.6926
Endo-2	15976	5500	9402.5	0	19527.9	102.767	75.5381	200.257	2765.78	96.1429	6429.26	110.757	13207.7	1690.05	46.1476	953	458.481	132.386	2616.51	964.595	2479.2	2643.81	1754.08	388.51	93.3524	233.462	319.162	2568.39	1.15083	-15.4344
Endo-2	16010	5506	9540.5	0	23045.1	58.5208	143.542	384.812	1814.73	120.573	1404.41	145.948	6735.78	2011.88	82.2292	549.854	1338.68	250.469	2319.46	879.594	1398.83	1153.25	1721.46	936.24	145.354	204.604	956.625	159.135	6.16647	-12.5071
Endo-2	16027	5518	3683	0	22345.6	90.8448	10.8563	11.6552	1469.55	171.103	2470.06	95.7069	16102.7	1909.03	72.2759	1092.55	436.586	62.4195	3951.52	1629.64	2233.34	3209.11	881.695	605.126	159.81	1955.78	730.994	130.759	3.91252	-13.5282
Endo-2	16050	5521.5	7645.5	0	14171.5	97.3158	4.39474	0.657895	1221.69	145.375	9377.74	125.901	18817.7	1096.24	58.5263	978.329	205.697	76.0263	1690.95	1007.92	1370.95	1494.02	976.382	767.007	61.5197	139.493	186.914	604.941	-0.988217	-15.9898
Endo-2	16057	5526.5	6123	0	25483.9	33.6735	49.7075	21.3401	1708.6	125.973	3225.82	109.728	16964.3	962.68	58.1361	1760.27	721.082	279.184	2225.76	1231.11	2305.84	1712.99	1529.33	547.211	101.279	241.163	585.51	172.816	8.04158	-12.2094
Endo-2	16062	5525.5	6658.5	0	52513.8	55.9561	60.9123	26.4737	1772.39	195.632	3337.39	75.386	17159.5	1497.76	62.2719	1219.41	480.561	244.579	4614.03	2486.74	2841.91	1823.75	1368.34	234.904	42.5	1174.04	437.5	894.912	10.0632	-17.2862
Endo-2	16069	5525.5	9410	0	17235.4	287.288	121.541	1657.67	3837	406.802	2725.21	96.2523	5425.61	1101.51	46.036	383.964	484.054	137.964	2108.35	649.919	1601.05	2911.47	1245.86	144.901	47.3243	157.405	637.973	2433.67	4.0005	-10.1615
Endo-2	16072	5530	7614	0	4448.76	149.589	28.4371	1.74172	4121.79	221.854	8831.52	223.53	12635.7	1105.83	103.119	581.258	22031.6	0.192053	7673.46	1737.88	2805.12	2003.22	1233.32	602.894	120.556	114.523	25046.7	663.689	-1.33695	-0.660142
Endo-2	16079	5532.5	4935.5	0	33406.3	67.0861	13.2384	4.27152	1956.56	90.7483	236.358	123.364	11100.4	1647.61	97.8543	978.079	871.384	115.914	3289.35	926.715	3390.47	1450.77	624.735	668.808	131.04	3186.58	775.378	80.0795	9.83468	-14.661
Endo-2	16106	5548.5	4413.5	0	33567.5	87.3471	137.746	415.933	1208.53	100.368	5026.2	96.3368	38988	1792.29	70	4949.61	306.585	1956.37	1529.27	904.808	6771.44	1089.72	1886.98	439.114	77.4197	303.523	742.44	205.456	8.8152	-16.1617
Endo-2	16131	5547	4922.5	0	26303.9	97.4444	0	4.625	1936.08	113.917	14.0833	72.3611	9796.94	1304.17	55	531.875	383.931	23.5	3988.96	477.542	3174.89	1410.15	180.403	429.889	71.2361	2517.74	303.139	49.5139	9.40067	-12.0008
Endo-2	16139	5554	2744.5	0	17942.4	56.5972	131.215	1418.12	3946.28	451.632	6733.9	118.292	8065.17	2274.78	99.5694	1031.62	1277.06	337.931	3243.39	5141.62	3361.21	1604.52	4492.8	1027.82	159.924	2896.34	948.542	132.938	4.26752	-16.061
Endo-2	16149	5558	6030	0	20959.3	99.2418	59.817	3.98039	4729.03	91.2876	3516.8	76.3922	13255.9	1289.19	53.9346	1019.26	151.209	37.183	2919.26	2589.4	2047.9	1716.82	2361.83	167.353	53.6471	736.144	125.804	67.2941	1.93397	-13.0043
Endo-2	16151	5563	2719.5	0	30190.5	79.7294	30.2156	43.0872	2971.31	127.761	2430.05	188.606	18129.8	1203.78	77.7982	1338.5	632.028	112.138	2950.28	1203.42	2942.41	1930.72	2084.79	1064.11	189	577.509	913.372	125.206	7.91721	-14.0206
Endo-2	16155	5568.5	3633.5	0	41371.2	103.568	62.3251	149.148	1041.83	188.095	5905.32	98.535	14881.6	1736.9	117.786	1076.39	579.753	303.551	3137.1	1555.31	2758.26	3611.99	1752.9	844.218	150.523	3204.22	639.506	2337.93	7.68086	-18.617
Endo-2	16157	5561.5	4376	0	22490.1	64.6103	131.047	59.0986	2687.92	115.455	12118.5	82.5211	20148.4	1492.74	80.0751	1080.36	325.263	216.732	3387.94	1519.94	1540.37	2371.02	834.23	307.61	72.507	1395.74	698.277	801.197	-0.0675105	-16.8211
Endo-2	16163	5565	5811	0	42810.4	69.3441	42.1613	27.3602	2357.15	157.532	977.495	137.43	11354.8	1738.49	72.0699	1074.17	726.936	304.914	3241.15	1045.4	2694.96	1691.23	1449.53	1048.92	133.978	1224.96	750.398	141.059	10.2357	-15.6427
Endo-2	16175	5563	4395	0	36874.2	95.63	205.8	173.22	5273.4	150.05	8278.46	116.08	18740.8	1778.69	52.21	1214.36	828.06	375.65	4593.08	2068.41	2326.48	1102.7	1647.23	799.22	66.04	3865.8	509.25	271.68	7.18164	-19.1365
Endo-2	16189	5571.5	2745	0	35516.1	62.6989	61.0161	596.489	4951.34	274.409	1692.72	110.93	11780.4	1493.16	44.3656	925.296	789.064	215.978	2782.79	1743.69	3322.13	1088.12	1689.42	648.731	67.2527	1211.22	890.876	74.129	9.31579	-15.2201
Endo-2	16210	5576.5	5848.5	0	23830.4	96.449	10.1071	30.5867	1742.48	128.607	867.418	113.051	3669.62	1217.98	70.7092	317.214	621.352	21.5765	2836.24	1615.64	2629.48	578.556	2700.47	1008.96	131.133	465.867	550.786	54.3418	6.4822	-13.3476
Endo-2	16211	5579	6644.5	0	43451.9	62.6429	68.2571	84.0429	2439.13	141.729	5304.4	136.343	5162.24	1258.24	54.2333	563.795	679.095	148.405	3319.83	1752	2010.13	1268.28	1284.67	473.371	158.2	342.281	423	3026.07	7.32758	-18.5837
Endo-2	16229	5588	5805.5	0	36972.7	142.099	80.0545	44.7228	2615.51	142.203	1882.09	164.708	4118.92	1988.87	80.802	943.302	767.351	390.767	3319.35	603.787	1932.28	1041.14	767.46	1192.89	146.465	944.847	357.485	233.985	9.6974	-14.853
Endo-2	16230	5585.5	7729	0	16595.6	91.2967	71.2308	26.6429	3485.7	197.951	8818.88	109.89	12030.8	918.143	46.0495	829.06	862.863	121.555	4119.2	1068.25	1827.49	1704.74	1690.67	610.714	60.7418	263.901	752.962	449.802	-0.511919	-15.8286
Endo-2	16231	5585.5	4389.5	0	49796	76.6	306.137	112.362	3036.72	156.613	2530.91	83.4062	20342.8	1234.86	75.4	1096.34	467.775	357.425	5016.86	2496.97	2367.49	1425.83	1665.36	386.469	81.8937	3203.72	569.587	223.162	10.4295	-16.6746
Endo-2	16265	5591.5	10124	0	17463.5	59.5682	100.015	32.3561	1243.99	69.9545	6492.92	85.3485	8180.8	1093.48	54.6212	352.076	695.614	142.439	2391.67	560.917	1503.21	2091.66	1052.38	296.371	44.4924	79.4091	882.121	1512.22	-0.504885	-14.393
Endo-2	16266	5591.5	4374.5	0	51791.2	64.4881	180.548	63.1309	1243.35	81.4881	1586.32	96.9524	17270.2	1057.04	81.5238	1134.65	439.298	231.167	2765.27	2201.07	1294.82	2496.76	1264.79	432.667	139.488	1994.12	545.774	178.702	10.6993	-16.1753
Endo-2	16287	5602.5	7422	0	36040.2	94.6345	112.838	69.6599	1334.27	126.203	374.396	93.132	6098.32	1049.44	40.0964	604.381	642.655	166.761	1821.54	717.858	1845.99	907.508	933.756	780.766	101.701	880.66	765.533	65.1726	10.1733	-13.0099
Endo-2	16295	5598	4379.5	0	51099.7	96.8713	195.416	164.317	2144.49	103.683	2483.61	62.4653	16016.4	1259.9	90.703	1001.11	587.356	263.644	5348.66	1868.01	2488.06	1485.46	1219.75	477.267	113.327	1329.81	604.188	204.832	10.2832	-16.7557
Endo-2	16301	5610.5	10100	0	54443.7	96	243.171	318.759	2044.1	159.318	6454.03	140.423	9621.42	1506.95	78.1539	808.559	875.021	440.507	3655.07	1439.87	3235.83	1892.02	3521.26	704.15	81.8392	117.472	554.311	2250.84	7.85613	-19.0932
Endo-2	16308	5609.5	2700	0	38014.5	68.3333	1.77987	8.13208	815.711	314.434	967.333	157.843	27208.8	958.283	87.4654	1572.44	543.793	112.17	2794.21	1017.49	2795.01	2322.99	1529.52	1104.3	222.27	955.214	841.528	144.333	10.5655	-14.7301
Endo-2	16318	5610	2151.5	0	19208.2	51.6568	1.11834	0.0532544	4669.58	53.2426	138.645	86.2249	22019.2	2173.27	215.284	46.5858	35302.6	0.366864	13683	1206.84	4498.54	931.456	95.8047	466.077	50.2367	629.71	54638.5	108.627	3.75821	7.75232
Endo-2	16321	5612	5849	0	2937.97	174.776	3.1619	0.00476191	2002.95	153.914	11904.4	114.443	10112.5	1560.42	79.8952	465.519	342.948	24.781	2787.25	2143.98	1643.07	1632.02	2091.63	515.91	94.2667	149.405	357.852	146.352	-2.40392	-16.3747
Endo-2	16339	5612	5427.5	0	26668.8	78.0614	32.9571	1.39877	1620	96.2822	1003.75	77.4724	4564.12	1070.43	80.6319	311.006	631.386	34.9632	2913.67	1153	2184.7	1256.99	763.38	229.699	50.3497	249.975	676.374	103.466	8.78182	-10.6207
Endo-2	16344	5620	7840.5	0	26889.7	204.5	0	584.554	4258.61	527.203	5166.33	165.376	19922.6	999.262	52.5941	868.911	746.51	58.8267	2676.73	6408.96	2695.54	2250.56	847.366	1111.45	121.441	1590.92	657.713	5198.4	1.6746	-17.2225
Endo-2	16350	5615.5	7810.5	0	19882.1	134.225	208.659	1694.19	10399.9	431.705	6451.24	155.473	11085.9	2315.56	65.2481	1186.48	1338.02	461.062	3127.88	5309.86	2450.67	1702.6	1784.91	2264.22	141.574	1459.88	443.155	3595.47	1.52076	-16.4318
Endo-2	16353	5616.5	3545.5	0	29667.4	49.069	8.77012	1.77011	377.77	76.5977	109.632	85.5517	6275.74	1129.46	33.3793	630.862	119.391	108.943	856.46	232.609	1698.82	950.897	675.414	209.609	62.954	209.391	542.149	47.046	9.36912	-11.4577
Endo-2	16391	5628	5933.5	0	37317.3	75.3194	0.347222	2.69444	1598.24	79.2083	0.361111	109.847	5664.32	1434.04	81.3333	165.014	303.708	26.2222	2836.62	1632.53	2921.12	1553.92	3149.78	294.375	64.4861	518.556	778.889	91.8889	8.29459	-15.3025
Endo-2	16396	5641.5	2103	0	33113	50.8186	126.289	223.976	1823.27	83.5245	4343.62	88.6569	16432.5	1310.75	54.0196	1035.59	118.99	367.73	2449.76	895.284	1861.43	1260.31	2985.27	344.108	49.3333	1001.63	128.49	371.02	6.83791	-15.9636
Endo-2	16399	5633.5	9642.5	0	18040.8	94.8137	41.7255	80.3824	2353.34	166.931	8845.79	86.402	6212.63	1255.18	36.8137	289.02	189.363	70.5	2374.54	1191.92	1469.87	1651.37	2224.15	462.069	189.853	28.8726	346.784	3307.32	-0.366605	-16.6786
Endo-2	16425	5644.5	2762	0	23429.8	60.9562	1.86875	0.1875	2231.43	78.3	0.1	108.531	7583.77	1156.7	37.0875	76.75	606.875	5.15625	3760.81	1481.37	5244.3	1580.54	733.788	224.006	79.1437	1330.65	1104.34	82.6813	8.62282	-14.1195
Endo-2	16452	5661	5385	0	25602	69.2825	10.4915	0.0112994	1739.49	83.113	1203.25	74.1695	13314.9	865.322	43.3277	668.825	586.458	46.6554	2244.41	1004.62	2157.08	1026.45	544.203	233.565	54	328.418	554.887	84.3672	8.69015	-10.2079
Endo-2	16460	5660	9477	0	35245.1	98.5166	155.076	336.72	2579.51	138.455	3604.43	163.355	9480.01	1711.09	93.0379	768.72	1078.67	174.114	4435.68	1261.86	3434.12	2519.59	681.905	554.512	141.507	421.9	837.569	188.1	8.94626	-17.1219
Endo-2	16473	5663	3233	0	19589.8	142.766	24.1533	98.8394	7544.28	256.416	6497.38	216.511	17430	1743.38	168.051	1656.96	556.657	217.255	3236.62	2052.93	4886.36	2827.2	2061.8	703.62	182.036	328.92	699.423	2452.2	1.92783	-15.4497
Endo-2	16476	5664	8221.5	0	17221.3	174.872	22.7718	59.9799	3996.11	177.289	4957.48	145	9216.03	1750.33	110.577	694.893	1068.09	195.114	3043.7	802.658	3204.39	897.409	891.846	1117.74	218.933	1042.43	329.524	1400.56	1.49513	-14.296
Endo-2	16484	5663.5	4308	0	14165.5	74.9744	174.949	41.8333	679.064	52.2051	10424.1	65.9615	16826.6	1719.01	105.077	1221.92	664.718	358.885	1471.41	556.91	953.051	1208.77	1264.9	176.731	28.7051	605.5	826.885	318.513	-0.872596	-16.1766
Endo-2	16487	5663	8231.5	0	27278	148.539	34.7237	18.2763	3233.99	87.9737	5514.67	67.2763	10572.7	1393.25	48.1711	666.395	952.013	97.829	2505.37	940.526	3377.37	1209.34	446.513	172.605	80.8816	2001.16	326.789	320.789	3.04471	-15.4193
Endo-2	16488	5670.5	1923	0	28565.6	71.2712	7.10734	81.9378	3528.01	263.085	2.38983	160.305	11342.3	2355.38	169.328	41.2147	410.655	19.5819	3125.07	2144.91	2905.73	1918.99	4569.45	1036.97	132.678	2915.08	578.864	134.158	6.31905	-15.2758
Endo-2	16498	5670.5	2759	0	31597.9	61.947	9.58333	4.78788	3884.09	88.7879	2222.2	72.9318	4260.01	1547.27	52.7121	243.765	839.364	23.4848	3445.59	1268.48	3787.92	610.477	643.205	372.235	71.4318	2100.79	1086.59	96.0682	9.53672	-14.6469
Endo-2	16503	5673	9559	0	17244.5	119.616	13.1474	184.037	1794.11	186.658	1238.84	128.316	11743.4	1445.21	116.342	340.921	1148.47	9.90526	2741.68	863.679	1987.37	4238.56	278.789	489.521	147.963	600.563	3018.18	189.158	5.23031	-10.8742
Endo-2	16511	5669.5	1890	0	23930	52.0854	0	1.03659	4195.55	98.6098	0.097561	100.451	13718.3	1319.18	85.9634	10.5122	37	14.8293	2093.74	1652.37	2456.59	2378.77	7060.49	71.7195	60.4634	803.366	640.5	94.6098	5.65117	-16.1043
Endo-2	16518	5674.5	4301	0	27953.2	126.943	223.919	27.439	1260.64	92.2276	10289.6	70.5366	8982.63	1690.36	66.6829	1096.21	580.829	360.252	2928.43	1241.16	2050.59	1792.67	1030.92	292.236	112.358	1865.49	649.268	713.764	1.58697	-16.8065
Endo-2	16524	5678	1908.5	0	35154.2	70.5936	18.5027	363.631	5157.22	213.433	76.5027	145.273	11707.5	2579.49	130.342	187.802	329.957	33.9037	3210.5	2241.44	3662.38	2642.14	3394.94	792.599	123.85	3085.42	600.85	125.428	7.25678	-15.5936
Endo-2	16535	5676	5923.5	0	29551.5	41.0698	0	0	1642.05	31.8023	0	47.314	12229.5	1748.99	142.616	565.698	778.802	28.7558	2786.6	2188.95	2259.78	777.361	1285.31	994.814	220.349	918.663	213.326	143.512	8.74711	-12.0895
Endo-2	16547	5685.5	7817.5	0	26644.9	123.131	81.1131	144.411	3927.96	149.881	274.054	233.304	7229.95	1236.6	55.3214	188.47	730.149	225.613	1847.64	820.595	2115.42	569.976	833.667	1352.46	135.405	322.369	218.202	94.8929	8.60994	-11.4832
Endo-2	16554	5691	7831.5	0	17607.5	130.096	11.3889	9.08081	6099.2	271.843	957.369	246.616	10501.3	1235.37	80.0202	448.45	708.5	46.6818	3006.09	1160.11	2299.42	1332.72	1387.61	1409.84	156.434	178.273	245.111	114.727	5.64664	-11.0683
Endo-2	16556	5685.5	8964.5	0	45714.1	86.0472	158.118	99.8583	2326.27	217.811	4446.53	151.48	10615.8	1493.91	99.2047	837.402	533.496	316.929	2366.28	1045.55	1929.15	2567.81	3162.93	695.874	144.685	1626.31	735.709	123.63	7.97183	-17.6766
Endo-2	16585	5691.5	3538	0	48271	101.922	32.9222	90.1778	1201.1	59.0444	2120.72	55.9889	2310.72	957.578	22	323.889	343.122	78.3555	6153.54	4579.77	2472.13	1529.4	2903.16	279.078	50.5778	4457.67	503.589	432.311	10.3007	-16.6951
Endo-2	16593	5700	8975.5	0	52883.9	154.461	199.922	135.881	2369.87	201.15	7182.86	131.943	10841.2	2007.91	101.653	1191.45	830.933	506.845	3674.03	1165.85	2988.38	2990.83	2507.72	1077.48	156.715	1658.75	915.995	79.8135	8.1313	-19.4633
Endo-2	16605	5699.5	1903.5	0	19352.8	54.8182	54.5455	221.889	5290.56	121.545	457.313	74.7778	5929.92	1984.54	99.8889	556.404	359.95	160.465	2482.44	1246.06	3533.76	1161.48	1735.85	402.515	80.596	1762.85	491.182	136.354	5.52422	-13.0517
Endo-2	16678	5718.5	9603	0	30504	113.864	61.7901	49.1852	927.84	182.457	1458.07	160.827	5284.05	1671.23	65.4815	320.099	306.543	167.926	1861.02	509.42	1601.2	388.531	1226.31	669.012	135.852	233.407	365.469	63	8.22008	-12.5163
Endo-2	16722	5738.5	7586	0	11267.7	131.596	160.86	103.07	3074.08	183.304	11814.4	196.585	10890.1	1484.95	63.152	582.889	113.579	232.626	4117.09	1736.71	1734.6	1437.81	2407.71	2084.53	173.158	127.333	163.006	106.561	-1.27655	-16.4955
Endo-2	16732	5741	3738	0	8615.03	79.1098	11.5723	0.774567	5042.83	120.382	22.8786	121.798	2413.45	1829.41	147.225	49.815	9547.7	7.28324	4599	1761.42	3133.6	1410.82	1972.12	414.601	89.3295	413.116	14293.8	157.347	-0.684197	-5.66549
Endo-2	16744	5745.5	2309.5	0	31223	62.2373	38.3898	50.2938	365.87	43.3446	1445.14	83.7232	5044.15	955.633	34.1695	209.842	707.672	90.4011	1894.36	584.893	1182.71	443.17	2912.76	171.944	46.5367	123.588	1168.41	64.5989	7.62833	-13.3468
Endo-2	16763	5745	9422	0	24029.9	89.4097	109.285	639.111	3217.84	271.799	8248.39	267.118	5194.15	2482.28	128.201	625.222	2074.83	364.604	3572.53	846.618	2563.78	1606.21	1743.9	1927.78	189.583	435.972	230.146	1527.53	1.92967	-16.1147
Endo-2	16785	5750	7599.5	0	15851.5	130.824	19.6641	1.58779	2979.32	264.534	3987.34	203.359	15375.1	1126.91	64.2672	378.687	563.183	39.145	3974.9	1210.66	1772.22	728.519	2418.02	1332.88	154.954	237.55	783.115	76.3206	1.67071	-12.5956
Endo-2	16794	5750	5701	0	44321	70.1414	4.82828	0	1779.72	127.061	2304.41	132.778	12471.6	1269.38	47.9495	1123.41	275.192	98.9697	2926.29	961.303	1987.33	2165.14	626.929	216.879	77.3535	837.333	420.657	90.6364	10.8766	-14.4534
Endo-2	16827	5759.5	3452	0	40828.4	123.533	6.88333	371.858	5443.75	435.558	3428.15	258.4	10652.2	3524.6	197.625	1372.79	1437.49	77.25	3912.58	3358.47	4958.72	2011.21	2170.28	2758.89	327.483	4351.15	976.008	993.683	9.62639	-19.0908
Endo-2	16854	5771	2630	0	40656.5	49.6243	15.4286	14.4444	2215.24	70.9788	900.429	102.603	8802.23	1101.79	32.8571	697.185	1107.17	48.2275	3906.2	1250.04	3694.67	1905.05	742.931	457.974	68.0053	137.841	1591.4	75.8942	10.5889	-15.0565
Endo-2	16916	5781	9695	0	41588.9	94.5833	16.2564	25.5705	1503.49	97.5897	1145.02	164.583	8928.04	1709.61	168.135	324.135	1298.81	89.2756	2783.24	561.135	2174.22	1951.54	328.808	706.519	158.218	1435.56	2613.58	93.4231	10.6471	-14.5077
Endo-2	16978	5791	8062	0	29252.3	199.131	54.9405	8.46429	2528.37	148.167	8094.52	113.583	15011.9	2126.36	64.7381	1607.21	853.845	359.583	3834.58	1401.77	2577.87	1857.94	1549.55	1129.29	117.286	210.024	439.798	1266.83	2.49291	-16.9567
Endo-2	16985	5794	7677.5	0	20258.2	113.819	87.7485	91.0468	3080.81	202.222	3245.65	217.392	15967.4	1527.79	79.6725	755.602	757.444	168.813	3017.18	1279.49	3756.64	1795.04	2302.53	1727.39	143.485	308.339	1565.81	80.6257	4.93736	-14.0844
Endo-2	16986	5792	3700	0	15765	66.9099	35.4414	109.55	2323.26	376.342	1963.6	257.018	3835.87	1949.52	127.775	299.27	1541.84	184.694	2561.57	1139.19	1219.24	1408.56	3243.36	2313.09	315.333	722.514	745.441	585.46	2.46406	-12.2415
Endo-2	16991	5793	7654.5	0	23218.8	100.935	77.4757	353.27	4264.98	232.059	2273.85	351.097	12158.9	1671.01	86.9622	434.254	1282.92	289.292	3069.54	931.719	2047.89	1119.85	1493.55	2680.64	283.795	348.157	822.476	83.6487	5.22124	-12.9206
Endo-2	17010	5805	3357	0	32586.4	81.5095	26.4238	50.6524	783.319	92.4524	69.2952	74.4048	16621.1	1950.08	120.243	1524.99	633.348	251.257	1536.55	924.724	2726.7	1798.09	549.771	191.781	66.1191	870.071	502.129	91.0095	9.67096	-13.6173
Endo-2	17047	5807	1681.5	0	27689	79.9784	98.6364	119.446	6960.9	73.5801	754.576	110.442	9406.03	2014.81	115.069	200.013	368.758	67.1342	2844.84	999.792	3476.14	1398.07	5288.09	903.381	131.433	625.463	577.216	122.623	6.05446	-15.4807
Endo-2	17049	5816.5	9189	0	38890.8	98.6397	227.667	384.36	1980.49	217.778	3592.75	196.993	4500.02	2026.64	109.785	901.051	850.115	357.781	2411.9	649.801	3279.04	1404.97	2670.95	1112.99	189.333	201.953	171.263	2351.25	8.40353	-17.5424
Endo-2	17078	5812	4071.5	0	10529.6	134.128	142.286	62.8421	6085.13	143.519	121.06	127.496	3843.53	1361.5	147.256	145.97	24499.2	4.77444	17497.5	1136.7	3025.78	569.774	109.744	410.15	209.519	162.09	28938.1	226.421	6.77739	2.28018
Endo-2	17083	5815.5	8059.5	0	15910.8	169.758	32.2803	0.0227273	4379.66	135.227	6438.75	174.167	17143.3	1526.17	114.318	857.295	809.333	60.5	4271.4	1794.2	2389.69	2417.72	2155.31	1030.2	89.9848	178.962	2325.19	495.273	0.609681	-15.219
Endo-2	17098	5820.5	4606.5	0	25358.7	101.825	36.9217	125.47	5019.15	140.982	10089.2	199.398	10186.1	1241.1	71.5181	538.217	341.054	196.934	3133.67	688.259	1701.17	2268.62	1121.43	1348.45	209.229	800.892	415.175	1254.96	0.963954	-16.6937
Endo-2	17123	5826	8696	0	7648.01	137.811	55.2264	405.918	3766.96	146.635	10299.7	122.478	8993.26	1734.06	83.4277	534.981	959.635	160.975	3526.41	763.547	2299.21	1577.51	826.566	1193.06	146.862	273.031	1024.76	809.717	-2.11628	-15.9748
Endo-2	17145	5828.5	8120	0	389.687	182.919	60	24.8586	2692.92	140.444	12009.9	169.404	24448.8	1736.22	121.374	1366.23	752.707	312.788	2724.08	1475.27	2749.35	2012.7	2570.79	1072.07	159.495	186.131	540.576	377.212	-2.79448	-16.4358
Endo-2	17154	5835.5	8080.5	0	32918.7	149.236	80.8851	23.2644	3862.58	160.138	8853.68	117.546	25480.6	2269.28	95.1782	1741.13	1120.58	375.569	4747.29	1526.22	3613.29	2289.2	1446.25	1407.86	204.391	269.862	1858.65	631.678	2.65536	-17.2191
Endo-2	17173	5848.5	8693.5	0	36213.4	134.603	50.2152	1509.54	2410.33	153.435	9021.52	104.451	13583.2	1315.54	69.5443	881.494	462.27	166.084	2505.25	935.215	1994.24	1759.38	1867.04	612.291	111.616	666.287	669.848	908.764	6.6759	-19.1093
Endo-2	17174	5839.5	1715	0	30204.6	100.309	73.2014	841.432	6248.93	114.36	8061.35	70.2518	9200.37	1863.06	127.597	645.46	302.23	245.885	4145.75	1369.5	4091.76	2726.1	3382.9	225.568	46.1223	3760.3	514.259	887.122	6.41538	-17.5137
Endo-2	17183	5843.5	7735.5	0	26038.3	101.323	126.833	37.6237	3662.43	203.183	4372.23	227.774	16711	1574.65	41.3763	1074.98	364.995	295.215	2893.75	1315.46	2811.52	2030.3	2688.27	1239.74	160.538	148.215	96.8817	2867.82	3.79331	-15.1964
Endo-2	17188	5844.5	9088	0	24247.3	63.6889	59.9111	506.637	1609.3	94.2889	7790.57	86.2	18206.4	1250.61	40.1778	1183.84	1320.16	322.704	2075.62	3785.83	1262.33	1839.79	1593.79	268.496	84.4815	2474.19	741.259	212.081	1.41044	-15.8656
Endo-2	17256	5859	7605.5	0	21507.9	112.773	38.3006	18.8957	1778.2	179.123	1414.15	198.313	18391.9	838.877	92.4908	728.632	522.276	197.356	1508.37	620.166	1224.97	1632.85	490.006	816.982	113.767	222.883	1184.06	55.0429	7.68858	-8.6405
Endo-2	17262	5862.5	2113.5	0	22128.9	69.0186	8.38605	1349.62	4206.35	108.098	2613.18	87.1442	9168.72	1142.34	48.8326	769.191	860.177	85.2512	2271.89	1824.7	4793.32	751.512	3626.53	166.94	100.66	258.963	1342.98	167.54	5.82746	-14.5062
Endo-2	17334	5874	3269.5	0	38138.1	95.9877	67.4198	596.716	2134.61	133.494	1022.56	40.3086	13971	1704.31	23.037	1506.47	401.617	308.654	2782.59	4546.37	4671.99	1296.85	872.111	297.173	28.8889	8457.01	213.062	118.951	11.4818	-17.3359
Endo-2	17356	5887	3268	0	44094.1	78.5052	37.1753	894.16	3031.63	102.959	195.804	57.5052	12244.6	1529.59	15.2784	980.649	213.361	214.948	2811.2	3785.38	3847.52	1839.6	853.84	213.206	37.567	7027.66	293.954	87.933	11.4341	-17.2875
Endo-2	17378	5882	2078	0	19441	44.5556	15.3333	20.375	3443.83	77.5	452.097	94.4583	7199.89	1159.08	64.5972	337.153	670.069	19.2083	2682.32	1365.53	2011.18	1119.21	3274.12	230.236	65.9167	272.125	1008.26	173.986	5.57268	-13.4025
Endo-2	17412	5891.5	8827.5	0	29395.6	50.3333	24.6857	96.7429	1050.48	115.905	5623.82	116.029	16361.9	1170.5	80.8857	797.876	629.971	241.962	1569.18	680.962	1652.05	1221.04	1923.95	680.238	82.3524	155.162	746.61	1437.65	3.36996	-15.744
Endo-2	17456	5907	5279.5	0	22942.8	108.742	30.1717	39.6263	3593.38	133.222	2783.36	157.096	10908.6	1779.56	134.348	569.485	1063.38	188.343	3369.05	1063.13	2354.05	825.742	724.758	934.798	116.535	1191.84	740.379	74.9141	3.96107	-13.5848
Endo-2	17525	5923	6362	0	17819.7	75.702	68.8586	121.707	5107.62	154.106	13302.5	136.394	7796.63	1167.75	58.697	564.106	722.278	151.753	2429.35	824.313	1373.09	1110.41	1472.41	413.374	92.601	96.495	501.328	3815.18	-0.705932	-17.2195
Endo-2	17544	5933	4174	0	38746.2	84.4327	34.4663	39.1298	4020.02	126.135	17.8125	137.865	15628.8	1518.33	62.8702	876.13	489.697	164.51	4023.25	1356.85	3765.85	1030.77	773.716	587.995	97.0529	2306.35	584.51	73.976	9.98456	-15.1174
Endo-2	17546	5929	9112.5	0	58139.7	83.1121	134.523	5.83178	1646.37	74.4346	3156.73	79.1729	16522.9	1629.7	55.6869	766.794	781.907	275.565	6295.64	1838.1	3331.55	1651.64	3500.62	664.346	110.79	67.2617	622.257	1586.39	9.1659	-18.2399
Endo-2	17554	5932	4691.5	0	25515.6	99.1548	37.9405	22.3274	2735.96	95.0298	59.6191	124.881	13492.5	1434.67	90.6845	317.696	623.369	54.5298	2734.01	690.095	2684.48	1130.61	391.167	336.036	82.8095	268.161	281.923	115.286	8.61752	-11.9276
Endo-2	17578	5939	8769	0	23921.8	110.32	66.2072	82.8513	2413.14	164.694	6703.24	145.014	15540.5	1309.05	103.563	812.676	620.446	244.716	2364.26	862.604	1917.19	1225.28	1572.13	955.572	124.126	185.658	492.441	317.851	1.65798	-15.5473
Endo-2	17603	5944	9395.5	0	18734	87.0485	48.1939	179.721	2337.42	118.836	932.964	181.539	5722.9	1831.28	94.4909	410.697	2666.36	70.8242	2190.32	611.479	2426.59	592.83	1258.64	975.358	122.612	151.37	3564.3	130.103	5.07951	-11.7207
Endo-2	17611	5945.5	5286.5	0	25621.2	110.867	43.8061	33.8182	5780.85	263.048	2868.01	191.291	14907.9	1789.28	51.6061	867.006	723.745	218.873	6812.57	1701.61	2544.7	1611.55	1726.36	1067.14	138.776	1793.16	437.649	113.618	4.39805	-14.107
Endo-2	17659	5951.5	6000	0	27707.8	97.183	53.6536	18.2876	2939.8	85.9281	1603.85	97.0131	16635.2	1441.08	72.3137	1149.92	634.346	113.065	3271.76	1104.76	1867.04	1594.12	1242.94	216.274	72.2941	91.5556	651.634	312.647	8.57199	-11.7174
Endo-2	17786	5986.5	2825.5	0	26832.7	87.0629	9.24528	10.805	3305.14	149.189	372.484	130.686	7879.13	1120.94	62.9182	484.384	723.698	26.1006	2149.86	516.403	2748.75	1104.55	1417.95	638.195	146.434	103.925	1517.65	90.6038	8.08609	-11.8697
Endo-2	17796	5991	5953	0	32563.7	86.2586	176.052	66.3736	4181.05	99.3678	146.885	96.0977	3306.34	1577.1	101.879	421.954	894.839	145.534	4202.12	1307.45	3321.02	1013.32	4834.05	391.057	44.9483	275.391	507.328	90.6897	6.45838	-15.5732
Endo-2	17813	5990	5669.5	0	44127.1	83.4412	6.05882	6.40196	1549.19	99.7745	192.471	97.5392	8132.44	1318.89	42.4706	522.627	258.578	204.716	1923.96	449.324	1653.32	958.637	239.343	359.216	109.324	318.618	385.647	78.8922	10.8997	-13.9298
Endo-2	17841	5999.5	3833.5	0	37415.7	72.6797	14.3529	27.8431	1498.51	200.752	230.954	114.118	11271.5	1668.91	127.908	897.856	4007.82	94.0131	6048.29	1732.65	3307.97	1061.35	480.771	631.333	167.503	687.444	1038	112.804	9.88709	-14.9763
Endo-2	17920	6025.5	1971	0	17193.7	51.3463	96.1905	60.7749	3305.89	143.394	177.303	120.71	3176.22	1502.76	108.286	179.792	103.359	151.874	1698.82	596.294	2624.63	1097.32	750.164	696.312	119.069	686.883	445.442	97.4675	5.90278	-10.3459
Endo-2	17926	6021	3263	0	16068.1	105.597	50.0398	34.7386	3916.08	186.256	655.807	89.3125	12650.6	2127.64	116.71	671.506	438.295	81.5739	3347.66	1147.85	2003.94	3369.92	1632.78	686.023	128.534	687.739	596.318	96.0284	4.40721	-11.8582
Endo-2	17928	6026	4085.5	0	51030.4	144.347	91.2883	174.171	2617.31	230.829	2737.72	130.824	25579.9	1296.91	103.099	1942.31	682.356	315.977	2186.78	574.275	2028.36	2845.53	1189.94	1033.64	188.239	706.032	754.446	1049.5	10.2841	-16.8838
Endo-2	17937	6021	3815	0	1474.46	73.7881	17.298	0.390728	3071.03	232.675	9687.23	247.993	13622.1	1971.7	159.073	994.914	521.225	45.8411	2195.92	1117.99	1834.09	1042.68	1197.98	1493.22	122.669	168.921	658.417	493.53	-2.74928	-15.6468
Endo-2	17944	6023.5	2021.5	0	13151.9	46.6304	111.225	312.391	6391.68	185.399	987.507	120.507	6632.38	1487.61	67.913	483.022	896.145	155.486	3124.31	1449.15	5050.15	1223.69	3734.64	927.072	150.529	463.87	1227.57	62.4855	-8.00316	-14.6851
Endo-2	17951	6025	8379	0	16191.7	95.7957	53.2903	445.457	5146.74	297.871	453.317	263.446	5149.96	1892.26	119.118	486.898	631	258.715	2710.43	712.5	2418.76	452.113	1631.8	1793.23	260.495	644.339	693.22	164.36	4.59153	-11.4231
Endo-2	17957	6029	3298.5	0	34289.7	73.8667	31.4333	10.6222	1961.37	132.789	450.428	117.256	9857.76	1731.07	94.9556	277.456	2744.62	49.2722	2816.09	919.6	4488.84	1530.96	873.472	596.189	96.7222	1346.74	2049.48	284.333	9.51431	-14.906
Endo-2	17968	6031.5	3275.5	0	34931	90.259	52.4458	27.1867	2578.08	178.512	946.614	103.108	9419.61	1419.89	67.8374	488.024	591.994	63.4398	2989.52	1270.92	2196.78	3056.64	1908.3	596.163	157.843	1672.61	842.771	143.373	10.0864	-14.1991
Endo-2	17971	6029.5	9324.5	0	26532.6	92.8872	57.9699	110.729	2563.35	108.887	225.744	138.789	3296.55	1738.8	72.188	161.722	1097.53	48.9925	4046.12	628.368	2222.86	460.947	1031.4	589.331	130.932	271.361	872.015	136.992	8.29854	-11.989
Endo-2	18036	6052.5	9979.5	0	14273.9	59.5593	98.8023	127.062	2539.82	80.9774	238.808	138.328	455.102	1605.16	117.938	142.537	17458.7	149.893	4597.94	1131.11	1767.99	332.83	2656.37	597.395	137.418	471.401	22672.2	129.062	-3.55975	2.93266
Endo-2	18043	6055	2814	0	23493.3	50.838	7.50838	7.19553	3501.37	101.212	16.1397	68.0335	7688.33	1348.31	73.352	565.067	2518.88	33.7654	3043.92	1920.85	2631.7	861.268	4796.44	237.749	92.514	561.106	6428.28	110.352	5.95344	-15.252
Endo-2	18047	6058	1540	0	30037.6	70.3386	148.032	57.1746	2371	84.7513	254.444	78.6349	5207.25	1395.91	85.7725	316.725	176.27	111.762	2479.85	673.402	2601.02	3280.55	5081.8	435.069	93.1429	3474.65	359.767	92.7778	6.31929	-15.5013
Endo-2	18053	6056.5	5794	0	5092.13	70.2081	70.5431	9.98985	1681.51	66.4264	9815.62	81.9442	6831.62	972.761	52.3198	498.041	691.924	122.695	1970.62	396.827	1203.89	1200.34	271.782	281.355	36.3959	153.046	587.442	3330.45	-1.81878	-16.0578
Endo-2	18081	6061	2351	0	18624.7	37.093	13.7442	16.6046	1990.62	168.822	8165.74	122.957	19684.7	1198.12	50.6085	1529.64	915.593	84.8721	2186.07	1135.32	1083.91	2158.79	2697.83	241.961	92.0155	606.112	1807.09	197.636	-0.156773	-15.7537
Endo-2	18085	6063.5	3737.5	0	25561.9	57.9945	27.2514	44	1746.13	120.011	2988.93	49.9235	9232.82	1072.73	152.257	240.858	359.716	112.689	2996.37	679.705	3445.01	1330.51	947.508	164.29	24.0273	400.033	3721.42	709.306	7.30105	-12.6373
Endo-2	18125	6079	6947.5	0	14640.1	89.6968	23.6199	7.78733	2597.65	136.154	8905.82	97.9955	5125.86	900.873	55.1176	314.647	364.733	75.8326	2469.63	1317.09	1527.04	680.805	3212.24	210.643	50.8145	82.1765	438.751	5085.1	-0.554143	-16.9938
Endo-2	18126	6075	1803.5	0	17786.4	61.711	12.3815	42.7283	3546.54	53.9942	5830.2	67.237	12223.5	1106.09	65.4682	576.723	366.214	146.064	2048.86	413.786	1855.09	835.081	2697.76	293.497	69.7399	1031.88	1495.68	238.04	1.23164	-13.2647
Endo-2	18134	6079.5	8911.5	0	21711.8	124.212	86.0529	68.9048	2738.29	114.831	1314.26	170.497	6188.85	1992.73	87.3545	318.915	1067.93	473.434	2521.94	602.503	2185.32	566.836	1296.21	1243.44	128	195.095	804.921	239.101	5.10345	-12.0209
Endo-2	18135	6077.5	1549	0	27719.6	74.1442	220.226	152.284	2458.8	93.3029	771.591	126.683	4761.86	1402.11	76.2885	360.043	37.7548	200.284	2198.72	911.99	3206.18	2192.42	3448.11	832.981	80.5192	4190.83	59.5337	104.894	6.71761	-14.7011
Endo-2	18175	6085	2811.5	0	29326.5	63.7246	0	0	96.5217	87.5362	4.21739	65.3043	20726.6	334.333	80	127.536	810.754	0.652174	1119.29	664.174	654.478	1761.74	49.5942	47	105.072	237.725	3759.58	87.4203	8.8352	-9.00694
Endo-2	18177	6087	3570	0	21487.4	62.8917	25.9833	2.33333	4544.93	208.108	281.175	63.9583	13126.3	1459.19	257.467	68.1667	435.625	24.7	2770.65	1242.61	2943.61	2179.86	971.125	357.95	65.3333	1321.67	4524.97	181.583	8.80229	-11.587
Endo-2	18199	6095	1802	0	33275	97.1597	76.6181	561.125	1897.42	102.743	8946.29	76.8542	17029.1	1897.06	136.007	1773.79	420.806	543.361	3442.85	1114.31	3460.04	1086.81	5192.36	306.549	75.5486	986.84	1034.14	679.549	6.01531	-17.5179
Endo-2	18214	6100.5	1793	0	31249.7	88.1704	81.0667	267.089	2794.28	100.948	923.659	82.037	17410.7	1723.44	71.9185	2223.1	474.748	752.63	2559.23	510.133	4305.34	1712.23	870.2	340.415	72.7407	1118.96	1362.38	40.1704	9.4304	-14.7227
Endo-2	18241	6115	2260	0	24254.4	150.785	76.4709	506.17	5106.56	226.614	2007.43	152.578	37785.4	1500.18	46.87	3387.23	1068.77	424.35	4586.1	1468.77	5026.92	2729.48	2970.74	455.677	68.6682	3752.43	1559.13	87.0807	6.28696	-14.3814
Endo-2	18242	6105.5	3900	0	32275.8	112.973	14.5467	0.92	1079.11	32.64	2055	49.1333	17745.6	1371.53	59.6533	383.627	547.493	10.0933	2201.87	829.507	1105.47	2023.11	3028.72	153.733	32.52	178.707	6549.12	837.707	7.47702	-13.8441
Endo-2	18293	6122.5	9154	0	35425	86.598	120.716	508.902	3700.76	148.618	7207.1	100.725	5529.35	1562.19	44.0294	386.922	600.539	141.873	4748.14	2643.9	1610.39	1252	1673.49	487.618	96.3824	275.971	536.392	164.01	6.77859	-18.6112
Endo-2	18314	6133	7488.5	0	37432.8	82.1026	34.782	15.4103	1161.97	130.756	6.14103	86.4359	9761.8	930.263	35.8077	313.654	548.071	112.647	1858.17	900.301	1460.22	710.769	3778.67	745.853	90.6731	362.968	598.609	53.5513	7.6711	-14.6753
Endo-2	18383	6151.5	9157	0	20043.2	91.9298	83.0614	92.807	1020.82	82.7281	6427.31	76.4386	6212.44	1476.91	40.7281	395.289	729.044	252.351	2509.58	1104.82	1660.23	1636.46	1297.01	317.614	80.9912	201.526	689.684	404.93	1.26635	-15.1228
Endo-2	18410	6165	5624.5	0	15637.4	120.059	78.7456	2.89941	1364.91	221.858	306.757	192.734	8936.47	1858.07	72.7633	658.941	610.746	147.124	2803.49	1342.91	2223.47	1151.72	2191.18	253.095	84.4793	341.13	602.817	91.5148	4.80274	-12.2556
Endo-2	18474	6189	9199	0	50828.9	74.6828	62.9409	80.328	1130.61	109.29	1784.18	154.145	10606.2	1380.7	62.086	590.075	677.844	227.672	4261.01	1579.15	2201.49	1149.96	1540.42	562.866	99.0376	125.575	666.495	113.118	10.2211	-16.5859
Endo-2	18529	6203.5	5795	0	18725.8	134.37	29.0833	85.0093	1533.94	135.824	3567.3	91.3796	5660.24	1613.77	48.8056	535.176	617.972	346.861	1402.71	335.713	1937.22	1020.8	881.343	593.519	98.4815	252.065	593.343	2837.91	0.86183	-13.77
Endo-2	18567	6215.5	7435	0	31004.3	114.987	148.693	65.4314	2306.99	185.124	471.399	211.621	21694.4	1619.87	57.8758	1008.79	1175.12	516.654	3715.63	2033.2	3170.18	1809.72	2244.92	1471.22	113.157	693.935	520.523	68.5882	8.13393	-14.7076
Endo-2	18573	6221	9926.5	0	37816.7	54.102	1.98469	15	1378.73	91.352	39.3622	125.888	5119.56	1602.31	60.9847	116.342	245.628	28.9745	1826.15	516.128	2043.29	998.316	204.653	714.577	70.2194	606.408	221.612	101.454	10.4131	-13.5272
Endo-2	18575	6217.5	9197.5	0	53726.2	79.7857	155.435	188.571	2721.15	183.968	2747.75	170.513	8086.79	1826.25	82.0584	664.467	1091.32	339.604	6194.64	2434.1	3362.72	978.688	2711.9	990.26	177.416	192.37	605.948	239.058	9.46814	-17.9627
Endo-2	18581	6221	8782	0	23444.1	90.092	45.069	142.534	2658.28	82.1207	4145.3	94.1437	8581.26	1440.75	62.4138	481.109	276.012	403.259	1934.21	484.034	1716.91	985.167	1409.28	543.914	93.4483	24.954	298.816	310.471	2.79203	-14.4804
Endo-2	18582	6225	5107.5	0	26959.9	98.8863	13.7251	18.6114	1525.74	95.9194	102.583	116.929	7910.35	1442.36	76.9479	520.052	149.72	89.4029	896.128	427.682	1643.91	753.109	767.882	555.706	82.4929	132.341	93.8673	90.9194	8.64269	-11.2096
Endo-2	18592	6226	9174.5	0	20501.3	83.5399	113.094	51.8169	2870.62	163.122	4913.23	104.141	10536	1596.42	61.0047	561.484	905.657	189.009	3110.48	867.648	2320.37	1290.85	1293.33	761.052	137.394	93.4554	611.141	610.789	2.07994	-14.5711
Endo-2	18606	6228	3542	0	37613.5	60.2222	60.0819	11.8246	1290.54	189.947	406.322	130.977	20002	1095.63	69.9123	609.807	504.111	145.579	2450.15	725.041	1965.27	1472.93	420.895	443.643	104.14	1977.71	893.702	233.216	10.7099	-13.5951
Endo-2	18609	6222.5	3522	0	15668.2	91.4306	10.9861	8.18056	1622.14	91.2778	431.319	151.236	22124.5	1876.58	114.986	405.028	716.958	49.0139	3144.82	1123.75	2975.65	2908.54	1302.36	397.069	122.264	666.458	1429.9	256.611	4.46614	-11.9419
Endo-2	18635	6234	6908.5	0	1588.45	69.4118	22.009	90.552	3937.92	132.1	11517.5	141.018	6115.1	1959.71	98.1358	545.842	998.371	158.484	4463.93	1410.01	1558.61	741.71	3249.42	1046.44	109.516	78	500.814	5273.92	-2.97745	-16.8619
Endo-2	18640	6233	7339	0	2494.41	100.632	68.3248	115.026	2765.53	132.709	12131.4	265.658	17254.7	948.077	37	1067.84	961.897	248.256	1030.73	91.2649	832.316	2016.23	256.188	1520.16	208.145	122.65	420.436	4245.7	-1.67482	-16.8449
Endo-2	18643	6240	2524.5	0	12146.2	73.284	0.975309	19.4815	2215.43	232.123	16.5926	146.599	13232.6	713.735	66.642	287.025	502.21	50.1728	1237.4	420.049	2885.22	868.944	544.728	925.895	216.525	325.37	827.309	34.321	4.41461	-7.45222
Endo-2	18687	6261	6380	0	10358.8	51.9884	47.9884	104.694	1824.73	100.097	14306	70.4922	15011.9	828.054	43.4612	1105.79	539.903	141.605	1595.95	718.527	1457.19	1431.82	1211.38	303.248	58.8333	92.8217	792.612	3401.64	-1.34694	-16.9642
Endo-2	18770	6279	3567	0	26848.8	83.3214	48.1309	19.4405	2855.38	228.44	1049.9	145.113	31212.8	1700.21	72.5536	1065.59	651.744	173.542	3038.88	938.655	3337.14	1702.22	872.184	946.923	180.565	1416.49	1402.58	384.232	9.21404	-13.561
Endo-2	18777	6282.5	3534.5	0	8225.63	70.7062	38.2147	43.9209	3915.76	284.96	486.96	155.22	16320.2	1756.55	78.4294	537.938	667.254	162.627	3968.44	1483.54	2578.21	2041.72	1836.05	1372.29	245.599	581.509	1139.12	155.401	-2.25823	-9.52403
Endo-2	18812	6293	8371	0	37722.8	123.082	48.6667	69.5535	1995.18	127.17	1190.42	100.491	12381.8	1182.91	54.1447	696.044	70.7987	247.296	1432.22	580.837	1778.21	2153.28	867.717	708.83	99.0755	1482.65	136.767	157.05	10.6181	-13.7912
Endo-2	18830	6300.5	5814.5	0	10981.6	141.556	1.17391	1.28019	4062.32	236.981	24.971	319.72	9680.92	1735.1	231.44	168.792	18871.1	16.5121	10202.3	1346.02	2161.91	1473.85	2.81643	988.063	159.609	171.217	34062.8	80.6957	-0.246828	5.44625
Endo-2	18852	6304.5	2856.5	0	28577.7	62.5366	13.6829	35.0894	896.602	42.2032	1411.11	83.0569	4881.02	992.236	65.9837	206.846	657.35	40.5203	1397.53	531.138	1409.07	601	2237.07	334.626	72.6342	132.748	568.138	73.6098	7.82073	-12.6895
Endo-2	18862	6307.5	9874.5	0	29703.2	54.0698	2.37791	27.5988	1793.77	102.948	2448.62	231.628	14135.7	1651.63	116.012	300.372	138.61	40.0116	1375.87	607.861	2291.91	1165.67	258.68	1030.76	172.994	160.634	200.407	108.407	9.41277	-12.6752
Endo-2	18872	6308	8614	0	18758.3	106.634	69.9268	32.122	2892.28	103.146	11174.8	98.2602	13720.6	1544.35	42.2195	936.634	751.512	329.528	4432.02	1024.98	2445.26	1969.12	1091.11	1009.91	152.707	208.992	802.455	865.602	-0.189883	-16.6431
Endo-2	18879	6314	6332	0	54033.5	49.8703	50.4865	92.5297	2127.79	155.919	3406.29	126.265	24861.9	1266.79	45.8378	1516.69	642.762	355.443	3373.36	1659.2	3667.98	1097.9	1701.73	394.973	96.7351	834.265	558.319	976.157	10.0917	-17.497
Endo-2	18886	6315.5	9946.5	0	18872.5	92.3636	68.0424	84.0364	1015.44	116.055	4962.99	111.873	14921.8	1795.8	83.9515	1172.91	240.612	331.224	1365.99	481.667	1514.87	1986.16	718.715	609.952	87.1212	914.715	159.855	188.455	1.12797	-14.1279
Endo-2	18896	6324	8593.5	0	36995.6	131.6	167.806	82.9677	1977.03	154.319	8696.37	106.103	11756.7	1617	75.3742	813.558	619.681	435.542	3839.03	1586.85	2487.04	1594.28	1446.32	713.932	145.239	353.261	843.516	428.906	6.70165	-19.1396
Endo-2	18910	6326.5	1994.5	0	21703.5	85.4062	0.988281	0.6875	2587.06	176.664	555.496	141.434	17976.3	1874.02	132.047	390.773	681.848	5.83984	2123.21	1454.4	2542.41	2389.94	6575.48	875.113	137.648	1162.26	330.707	253.766	5.62825	-16.0038
Endo-2	18931	6329.5	9186	0	33760	63.8788	90.9818	49.0121	1960.84	95.9879	2039.15	130.37	10026.6	1659.36	67.5455	652.236	420.885	197.497	2443.99	459.891	2262.36	996.085	985.915	428.752	147.764	915.358	269.449	114.788	9.64622	-13.8552
Endo-2	19103	6376.5	5723.5	0	27868.9	155.126	29.0815	27.7407	3497.17	143.578	7949.58	179.733	16214	1747.72	98.7037	1692.29	944.748	254.252	4218.72	1133.91	2053.75	2115.6	1156.87	845.282	88.7407	828.97	625.393	2343.99	1.87924	-16.6835
Endo-2	19124	6381.5	6721.5	0	11501.1	65.2451	14.3186	29.1814	1743.18	145.897	18048	95.4951	21177.2	1097.5	35.0588	1562.51	788.735	231.554	2366.5	1062.73	1635.11	1811.71	799.338	918.588	110.975	192.216	740.314	1927.52	-1.48366	-17.0081
Endo-2	19147	6384.5	4097	0	46093.9	73.8406	27.087	65.6884	4012.86	152.246	1318.87	84.558	18028.2	1435.28	75.2319	755.094	536	223.986	3129.46	1481.63	3379.08	1930.99	1638.1	953.232	186.551	826.167	588.87	127.304	10.2128	-16.5517
Endo-2	19197	6403	2856.5	0	33440.4	70.0699	20.0645	902.806	214.269	264.446	979.457	83.6021	15374.6	1088.31	43.3387	697	432.478	88.4624	1287.49	892.812	1564.05	872.29	973.306	114.511	72.5914	1286.98	862.796	68.3979	9.95798	-12.6529
Endo-2	19236	6408	9256.5	0	18265.1	94.8205	0.166667	43.1667	1292.96	84.3718	127.513	141.692	13680.2	1608.92	56.8718	487.423	1216.72	105.513	2301.38	1346.94	2246.28	1191.09	7135.61	729.321	106.808	555.449	650.897	77.7949	5.50566	-16.1574
Endo-2	19242	6419	3185	0	31638.4	69.5819	33.904	203.655	1972.77	137.593	1294.69	121.842	17563.2	1076.32	60.452	866.452	170.593	119.497	2025.43	1570.83	2988.25	1584.72	552.927	388.107	71.7627	5988.77	846.548	131.282	11.0405	-14.4163
Endo-2	19272	6425	4602	0	34724.9	49.798	53.5505	33.5707	2955.43	68.9848	37.6869	133.096	10078.4	1285.22	74.596	620.793	408.308	116.172	2256.6	1031.37	1353.52	1015.3	1344.13	174.717	107.359	121.369	620.47	67.2879	9.91588	-12.7404
Endo-2	19284	6425	5736	0	41475.6	122.806	76.062	77.2791	2007.3	164.248	3075.33	102.775	14909.9	1599.86	69.0078	1069.34	780.171	167.729	3060.99	757.713	3490.52	1084.85	784.139	730.481	100.837	1456.35	581.039	881.101	9.76304	-16.6151
Endo-2	19306	6433	8530.5	0	21078.7	77.885	51.435	189.045	2503.34	94.355	423.075	85.795	5184.06	1013.01	68.49	192.67	440.76	73.23	1535.25	714.185	3324.19	468.705	2048.49	382.22	91.655	120.195	571.41	99.59	6.91486	-12.2418
Endo-2	19376	6443	5745.5	0	39588.7	112.429	37.8889	11.4365	2907.5	156.849	1604.2	97.1825	23115	1706.37	76.0159	1303.67	675.809	234.19	3388.8	550.619	5957.65	1520.43	468.794	470.714	127.476	2094.67	780.865	321.103	9.51335	-16.3123
Endo-2	19420	6453	8097.5	0	25732.5	113.37	0	0.388889	2149.2	172.639	219.093	151.963	13145.7	1361.9	70.7685	69.4444	13172.7	0.0462963	5537.75	1408.35	2129.19	1210.79	1315.03	1270.81	151.157	750.787	36996.3	146.324	10.9987	-9.80088
Endo-2	19431	6458.5	7399	0	12734.9	104.75	74.0192	49.6987	3436.3	114.269	2523.3	180.564	16397	1390.07	45.9615	1390.96	837.103	411.077	3980.12	773.795	2338.13	1352.47	1514.89	1009.33	104.109	576.006	542.628	2791.91	0.397623	-13.3124
Endo-2	19473	6463.5	8100	0	20545	76.1515	0.0151515	0	1693.73	128.864	83.2727	57.2121	14899.8	1006.88	47.2727	74.9697	6528.33	1.78788	3186.21	1108.94	1862.39	951.742	1595.67	876.121	116.909	1013.42	24578.7	217.727	10.2394	-9.57197
Endo-2	19502	6473.5	1655	0	43042.6	56.7364	164.326	193.651	5460.03	75.9302	3776.4	144.969	9370.74	2079.49	86.4419	528.589	650.217	348.202	4039.38	739.116	4185.61	1781.27	2890.41	1456.09	163.132	3349.62	1075.92	452.938	9.13029	-17.6873
Endo-2	19519	6479	9158.5	0	54638.8	95.8036	102.577	194.03	2674.36	114.125	4177.21	90.9464	9287.62	2150.11	36.9762	710.732	796.595	137.44	5481.71	1237.02	2919.79	2088.03	2682.43	335.792	76.9524	1078.75	891.107	1230.22	9.07898	-18.5988
Endo-2	19528	6477	5805.5	0	48490.8	176.453	15.4133	77.1733	796.907	164.72	261.947	116.6	13472.5	1617.59	74.2933	756.467	412.973	293.027	4321.72	842.627	1341.6	1590.43	1135.81	1839.88	148.52	2212.49	157.667	80.6933	10.8037	-15.3794
Endo-2	19537	6487	1661	0	31226.1	84.5747	152.718	139.736	2914.77	121.54	10028.5	114.983	24028.4	1788.1	73.1839	1481.05	508.569	548.558	4066.99	703.092	2973.9	2139.71	1552.53	917.546	83.7931	4691.63	1271.87	2467.29	2.36544	-17.255
Endo-2	19542	6481	5783	0	35387	152.72	63.2796	54.3118	1782.4	146.559	402.323	112.226	16371.7	1587.88	63.8495	873.064	763.226	306.473	2830.7	1157.67	2607.88	1624.8	2193.8	976.161	152.054	1784.47	778.032	357.097	9.1334	-14.6419
Endo-2	19547	6489	4623	0	27542.1	68.6612	130.552	24.3169	3673.07	94.6011	954.066	74.5246	7981.49	1378.78	79.0219	571.432	499.077	100.361	3102.61	1924.22	3480.15	962.896	3547.97	423.251	75.9126	373.76	635.432	67.7486	6.39065	-14.6548
Endo-2	19566	6492	9517	0	17845.4	100.106	109.208	2138.46	10603.8	388.216	8021.84	203.984	7383.51	2256.36	125.024	862.157	3608.28	232.459	5548.83	2770.04	2951.89	1021.09	2323.69	1404.74	171.494	1130.25	3512.29	4420.47	1.4691	-16.5695
Endo-2	19570	6500	4987.5	0	39641.7	86.7793	31.1362	4	368.277	59.0704	1146.33	73.6995	17283.5	1252.04	49.23	1031.66	423.897	59.0329	2953.75	1286.32	1617.29	1987.71	584.216	248.958	72.9671	2546.32	533.432	258.192	10.7512	-13.9481
Endo-2	19574	6497	4127	0	24947.2	73.7927	45.061	1.77642	2408.87	129.504	29.9024	106.39	8950.45	1053.65	83.1911	265.106	536.565	9.80488	2625.31	627.215	2758.31	794.447	1103.11	252.293	62.4553	196.431	667.553	96.0163	7.96012	-11.5828
Endo-2	19591	6497	4111	0	28256.5	70.3576	66.3576	5.98675	3471.96	138.907	119.768	96.351	4625.16	1163.32	64.3974	124.94	161.689	26.0464	3785.19	869.55	3953.07	1102.23	772.676	297.775	79.5033	374.57	120.457	106.695	9.25726	-14.0914
Endo-2	19615	6503.5	2052.5	0	31930.9	52.2714	0.251256	8.87437	3667.61	170.94	150.392	137.226	20308.1	1122.96	116.889	158.291	311.935	0	3406.55	896.362	3051.97	1537.39	346.598	498.452	151.774	241.573	7642.3	203.839	10.047	-12.7823
Endo-2	19629	6512	9437.5	0	22912.5	87.95	143.808	219.954	2540.2	126	10039.5	141.771	9899.29	1909.15	69.775	782.554	887.746	231.129	3430.51	664.058	2116.47	1313.4	673.925	599.475	104.917	935.696	2641.08	2676.61	0.759095	-16.828
Endo-2	19656	6516.5	4113	0	16769.6	108.286	30.3333	47.2321	8255.85	159.071	288.875	170.619	10057.2	1419.58	109.97	497.399	324.613	67.2024	3822.83	1336.28	3061.27	1003	1852.37	836.5	203.018	261.31	125.661	105.875	5.95695	-12.1365
Endo-2	19673	6516.5	1632	0	37248.7	61.6759	58.8056	96.3704	3351.5	132.954	3338.3	83.0648	14195.6	1860.6	85.6018	805.806	577.667	356.907	2935.46	630.083	4097.8	1689.02	1845.77	829.694	78.5278	2566.82	920.722	120.639	9.09503	-17.0729
Endo-2	19691	6525.5	5830	0	41958.8	90.6032	67.9524	2.42063	930.857	77.6587	87.3413	90.2778	13937.9	875.183	74.5397	650.817	798.032	46.0556	2613.34	1159.52	2097.83	1731.01	672.96	200.73	41.8175	1754.21	1955.67	58.5556	10.935	-14.0114
Endo-2	19713	6531	7485	0	515.073	113.504	152.756	22.0732	1153.22	152.415	15195.9	154.837	17078.1	1028.87	41.7968	1857.32	436.35	453.618	2303.51	407.659	996.699	1015.12	1581.2	1336.29	137.211	90.4065	242.073	624.919	-2.03056	-16.5455
Endo-2	19746	6540.5	1660	0	29941.1	68.9457	10.2868	15.9767	2993.53	140.767	59.9225	122.798	6260.77	1908.57	160.434	140.891	687.209	116.891	1868.66	504.961	2275.07	576.55	2077.28	1110.07	103.318	595.178	1314.31	152.233	7.9507	-12.7939
Endo-2	19761	6549.5	9624	0	19424.4	77.7192	60.8473	275.852	2648.43	114.419	4506.99	139.148	12186.3	1670.61	70.8719	844.542	536.862	188.798	2394.99	797.271	2027.01	1389.26	1980.31	806.458	139.576	218.847	555.182	154.566	1.86601	-14.2035
Endo-2	19771	6554	7513	0	37470.8	96.3438	55.8281	80.8281	1372.45	202.495	4569.85	200.167	20866.4	1227.65	39.5885	1467.95	905.255	229.438	3179.02	735.714	1826.01	2823.94	1585.37	1410.24	138.036	3966.43	426.021	588.698	7.79208	-17.3808
Endo-2	19772	6546	9313	0	41343.1	120.619	136.4	181.848	1258.89	115.724	4947.79	148	13536.9	1687.83	55.3429	885.724	746.686	343.029	3761.32	1288.94	1848.18	1826.84	1186.42	381.352	113.533	2045.66	796.676	810.876	7.87956	-18.2102
Endo-2	19844	6565	9307	0	50881.9	76.679	143.753	276.753	1779.73	135.259	3122.31	112.704	16773.7	1836.88	75.8765	1017.86	1161.31	405.444	3689.37	1247.02	2703.96	2298.43	1265.58	707.012	70.7778	2050.11	759.457	1051.64	10.0783	-17.301
Endo-2	19846	6570	5933.5	0	32179.7	119.811	68.0063	71.4591	2323.46	100.472	1418.74	78.2013	16100.4	1562.08	82.5849	1223.3	458.818	135.535	1590.4	994.56	2621.27	1122.83	978.711	402.786	116.975	132.585	406.069	131.799	9.5667	-13.3861
Endo-2	19849	6575.5	2403	0	49525.6	85.7783	17.7547	4.91038	2985.03	125.42	3149.43	122.868	16731.7	1286.53	44.2547	854.335	830.821	116.08	3436.19	1179.12	3186.5	1356.09	1295.15	480.349	123.382	504.458	2365.4	2571.37	9.90668	-17.3181
Endo-2	19855	6578.5	5896.5	0	40312.2	125.778	28.9278	5.95556	549.217	118.789	9412.1	83.7778	12224	1192.5	60.3	999.489	771.867	118.911	5505.99	3500.09	1953.49	2342.33	2219.67	404.889	34.6444	3143.31	977.5	283.022	7.06273	-19.419
Endo-2	19870	6578.5	9936.5	0	13019.6	82.8913	226.264	40.192	4787.71	81.8478	13401.1	118.388	22645.2	1588.09	64.9565	1276.28	740.42	388.192	3057.52	1555.34	1914.18	1543.1	3433.35	459.333	89.2464	1025.69	761.42	2552.85	-1.18731	-16.9085
Endo-2	19876	6576	3743.5	0	43087.2	54.4286	0	0	566.257	182.505	3.13333	99.9238	15810.2	940.648	79.5143	55.3143	26.7048	2.52381	1173.81	1317.36	1626.14	2074.51	3530.42	657.933	162.552	377.381	233.514	185.105	8.48383	-15.8855
Endo-2	19884	6575	5909.5	0	487.318	105.485	40.6364	138.773	1028.42	166.182	16316.7	91.4091	13667.8	1031.61	43.8939	568.924	844.697	15.5455	2500.86	2329.98	870.152	871.636	2107.12	110.53	42.3939	57.6818	1181.86	140.227	-2.05242	-16.6021
Endo-2	19908	6587.5	6823	0	19414.2	45.6212	58.1288	249.03	943.5	75.447	72.0076	77.4848	9432.22	1049.26	78.697	640.106	586.28	158.477	1800.99	806.689	4041.34	533.636	517.303	370.955	89.7197	548.129	386.182	91.5303	6.93291	-11.8183
Endo-2	19941	6605	5921	0	12612.5	91.1189	8.16216	23.0378	1896.22	136.924	9564.72	144.324	16293.9	1269.99	104.081	1349.94	835.795	71.2324	3202.06	982.476	1795.7	923.4	511.416	648.957	95.6703	136.373	794.303	102.519	-1.24296	-15.9033
Endo-2	19986	6613	5874.5	0	48729.5	120.089	3.80729	0.09375	858.984	99.4167	2383.01	77.9323	20752.9	1078.6	60.2344	1059.63	625.734	31.7448	4819.76	3107.94	1989.69	2630.39	3676.64	309.526	56.3438	2023.47	561.818	138.76	8.57896	-16.6929
Endo-2	20003	6622.5	2510.5	0	45861.7	47.5289	1.04959	677.231	1537.56	264.355	1171.39	139.992	16569.7	754.612	70.0826	458.26	428.178	24.6157	3022.06	2233.52	2514.9	1792.14	1139.35	696.178	117.302	1906.59	592.913	99.3058	10.9358	-15.6726
Endo-2	20004	6616.5	5647	0	30801.9	94.7389	25.8778	73.1944	1745.56	55.1611	132.372	71.8167	11028.8	1430.95	64.1389	872.9	1524.84	138.5	2924.77	366.411	1677.32	587.478	233.706	566.483	71.6833	474.194	992.45	92.5278	9.68709	-12.2742
Endo-2	20016	6620.5	2750.5	0	28612	56.875	1.16667	3.38889	3045.73	96.3194	569.375	116.486	17858.7	796.611	49.9653	525.118	371.653	20.2778	3895.16	1455.44	3403.58	1833.61	1734.08	242.299	87.0764	577.681	796.201	313.674	8.76424	-12.956
Endo-2	20041	6628	8599.5	0	18714.4	109.971	29.3908	140.46	2101.8	84.6897	4498.87	82.3621	26456	1084.79	80.546	922.701	510.626	167.466	2268.75	712.287	2082.67	1751.7	800.908	648.684	115.494	135.379	1001.43	354.517	0.418553	-13.1951
Endo-2	20068	6638	2740	0	35148.3	95.5777	0.203883	2.93204	4298.74	166.447	5691.68	82.0922	39561.5	950.053	47.8301	2118.33	233.583	52.9029	4551.12	3186.02	6322.98	2880.91	3336.85	447.286	97.3641	993.743	546.471	1118.19	8.77149	-18.3871
Endo-2	20082	6644.5	4071	0	16521.4	72.9735	84.7778	5.89947	1119.53	94.3016	2870.49	72.9048	25862.7	1063.37	57.291	1055.85	283.053	53.1164	5252.76	1359.24	2294.88	1430.1	1986.11	212.952	55.8201	161.958	455.111	505.228	1.64184	-12.041
Endo-2	20090	6641	3037.5	0	7372.41	36.6	111.587	14.46	1090.83	104.68	11876.9	132.127	22401.6	1301.28	63.1467	1549.75	301.453	360.28	1414.29	596.88	747.093	2561.17	1557.07	721.873	110.753	144.707	1121.4	451.6	-1.89485	-16.4242
Endo-2	20132	6655.5	5664	0	37464.8	100.296	31.2116	11.8148	2383.29	124.005	814.032	131.619	13158.8	1439.83	84.5926	663.915	7905.81	67.8783	3465.48	1058.12	1999.36	871.254	1274.77	429.101	101.397	600.37	1440.56	83.2434	10.1664	-13.6036
Endo-2	20139	6656	2012	0	18035.2	88.186	528.959	154.808	9015.83	129.953	5967.28	137.814	13358.7	1670.4	73.6453	1116.48	1319.9	267.43	6715.05	1579.47	3427.84	2302.62	2874.8	848.639	151.843	195.779	1984.02	1195.34	1.2189	-15.3605
Endo-2	20176	6661.5	5850.5	0	68.8611	145.296	0	0	934.028	93.9352	12364.3	133.769	8482.21	1340.97	101.75	90.7593	453.963	0.12963	1672.06	571.176	1159.47	1327.88	214.139	234.167	193.657	56.9537	1619.09	302.861	-2.19049	-16.199
Endo-2	20205	6665	8169	0	40230.4	130.652	7.66667	1.5942	2686.65	75	1073.01	96.1159	20496.6	960.826	45.1014	932.232	488.072	167.203	3279.16	633.696	1425.06	1505.48	1252.72	731.58	110.304	2958.38	872.652	56.3188	10.8118	-13.9285
Endo-2	20224	6677	3046	0	27078.2	50.3548	51.5161	251.929	3473.26	79.1484	113.297	57.0645	11939.9	1076.06	31.4	463.542	521.761	61.671	3369.76	1171.92	1715.81	4736.23	3562.23	197.626	76.529	2315.94	11786.5	273.529	7.268	-13.9375
Endo-2	20230	6678	2408.5	0	38533.7	43.8205	24.3846	11.4487	2892.67	136.84	144.519	160.295	31317.7	939.603	55.0064	1749.65	613.724	323.891	2134.49	719.199	3029.89	2907.6	385.058	717.41	108.968	608.699	936.641	844.712	10.8585	-14.442
Endo-2	20242	6677.5	2719.5	0	37033.3	92.4574	2.04651	0	1019.54	97.7985	6181.73	147.605	25964.1	841.271	51.6512	1021.29	418.76	40.1783	1859.99	828.76	1899.28	1953.44	1921.3	698.55	136.178	216.93	837.202	607.302	6.74563	-18.2104
Endo-2	20263	6689	4084	0	12194.7	88.835	152	6.93299	2507.2	131.557	9283.14	72.9433	21880.3	1526.34	74.835	1068.91	641.706	162.907	4224.85	1291.42	1780.94	1093.35	2094.04	203.495	80.0773	77.3144	469.392	298.758	-0.642091	-15.9436
Endo-2	20275	6686.5	6049.5	0	41936.8	84.6101	42.9057	23.1698	2349.72	176.704	47.2956	97.9685	10350.9	1687.5	88.434	602.78	1810.89	125.484	4056.46	1050.22	2239.99	566.245	1286.31	394.874	43.7044	1161.07	790.396	56.3208	10.158	-15.5417
Endo-2	20292	6692	9187.5	0	34155.4	42.541	14.918	209.563	3211.48	130.197	1056.26	119.071	8895.62	1314.39	59.847	307.333	212.295	33.1257	2038.5	449.727	1864.01	885.945	807.825	561.563	102.891	198.863	225.186	94.8852	9.92202	-12.7527
Endo-2	20311	6694.5	6152	0	25594.2	57.3457	41.2222	36.3395	2422.91	154.012	132.383	73.0741	10642.1	1292.93	38.8333	968.512	2215.25	238.889	2231.24	1780.94	1172.71	1243.45	3403.83	265.247	84.6543	4180.81	1019.61	101.975	6.91055	-14.0249
Endo-2	20321	6696	5069	0	46218.6	104.085	0.366013	0	2223.9	144.562	729.693	149.993	13367.4	1509.76	58.2876	692.216	589.497	20.0523	2634.99	745.163	2514.48	924.771	642.346	167.621	93.2418	268.49	834.869	120.275	10.9078	-14.7534
Endo-2	20331	6698.5	9631	0	10867.2	66.1844	117.426	183.092	2041.89	95.1277	944.702	98.9291	3679.77	1586.15	48.3901	304.163	849.801	132.596	2023.67	1444.71	2558.47	431.284	1920.34	372.305	85.7092	2304.13	481.319	85.7943	1.31037	-9.84704
Endo-2	20345	6700.5	4996.5	0	34049.8	152.411	0.306452	0.0725806	1282.59	147.75	7.8629	67.3871	8413.87	894.476	71.7661	305.387	156.306	2.82258	2540.4	901	2055.27	1443.58	432.484	294.855	78.5	1073.77	570.79	4374.29	10.5204	-12.4576
Endo-2	20384	6711.5	6099.5	0	38759.6	62.4739	13.5118	25.9384	3103.27	167.332	59.5024	173.441	15638.9	1818.81	78.5118	1290.92	7601.08	237.91	5065.21	2051.61	3811.23	1349.79	3675.79	695.991	138.365	452.455	715.284	92.1422	8.78761	-16.433
Endo-2	20397	6712.5	2321.5	0	21911.8	85.48	52.07	42.87	1564.91	153.41	6686.04	135.46	23583.7	1332.64	97.28	1578.13	617.39	475.97	3041.85	744.64	1904.91	2860.41	433.13	1293.37	212.37	911	695.33	695.56	1.60149	-15.5072
Endo-2	20407	6716.5	1076.5	0	18134.5	46.2929	49	62.9214	1953.57	94.1929	91.5	84.8214	8097.57	1508.91	109.279	148.557	379.536	84.4714	2064.4	239.386	3932.76	894.886	1499.96	370.521	72.9143	274.821	439.493	109.207	6.52194	-12.3542
Endo-2	20463	6730.5	2319	0	12935.8	77.9837	343.317	44.6016	5690.17	58.878	12586.5	118.301	16702	2374.18	116.439	2672.21	978.504	539.179	8153.4	2754.12	2930.14	3534.46	2418.23	432.081	119.878	492.886	1524.65	327.057	-2.18265	-17.1737
Endo-2	20491	6737	7500	0	21858.3	129.689	34.0778	169.378	2593.36	276.767	14339.4	132.789	9552.88	2124.66	53.5556	1373.4	880.356	270.089	8323.35	2360.91	7093.93	4577.99	2244.24	771.156	164.244	1618.84	3593.41	4913.18	4.73509	-22.4384
Endo-2	20530	6752.5	4693	0	49063.3	113.711	1.79518	15.7771	1963.1	114.428	950.62	86.7169	31865.3	1303.25	39.4759	759.512	373.139	14.3012	5618.96	3352.01	3401.87	1581.56	1378.33	374.892	55.1626	10076.1	755.801	1598.93	11.4218	-17.3613
Endo-2	20556	6760.5	10056.5	0	32508.9	76.6804	86.726	1277.58	3833.43	224.744	946.726	169.416	8553.93	1366.31	63.3516	674.498	639.438	321.192	2663.97	3388.07	4007.58	2269.84	2032.47	484.384	94.9269	3712.39	433.895	116.37	9.14893	-15.4568
Endo-2	20574	6760	4177.5	0	21547.7	84.5	9.33333	12.9917	2047.96	59.6667	1281.8	90.2833	21320.2	1560.3	98.825	773.958	577.358	87	3866.17	1795.87	2314.9	1968.48	3252.07	796.633	112.692	127.633	642.683	163.967	5.88337	-14.0981
Endo-2	20575	6763	4215	0	39840.1	78.6424	54.5273	65.7879	1300.77	146.158	3010.42	111.067	24419.5	1266.3	51.8182	1191.45	292.909	200.133	2864.7	765.727	2458.54	2868.85	690.564	656.691	100.503	3349.7	585.285	390.43	10.6152	-15.365
Endo-2	20578	6759.5	6814.5	0	26660.9	98.1491	23.0789	416.482	2499.23	335.096	4924.34	74.8772	18764.3	1555.42	64.6579	1399.78	789.281	98.2281	3000.38	1803.44	2220.64	2478.48	1369.85	281.351	37.1579	3565.14	643.158	2848.04	2.90841	-15.5085
Endo-2	20580	6760	2393.5	0	26159.9	149.258	44.4091	3.43939	596.712	226.076	6929.21	154.803	44271.8	977.682	73.4545	1869.12	362.303	220.227	2890.08	2249.68	1651.85	4967.52	1392.39	210.561	127.955	1753.47	694.167	78	2.24335	-15.9553
Endo-2	20638	6780	6022.5	0	29461.5	100.614	16.9905	7.71905	1304.83	97.1619	163.881	143.576	19192.6	1335.8	134.862	798.286	1063.79	24.2429	1692.27	772.433	2918.32	1087.45	229.719	262.262	76.9571	412.848	1672.72	116.262	9.5271	-12.247
Endo-2	20710	6797.5	4235	0	40285.8	137.517	37.7379	11.6138	1592.15	75.2276	124.931	73.6897	30382.6	1246.26	83.1448	1034.12	474.476	53.6897	3250.13	1193.58	3525.54	2622.95	1567.68	327.979	118.407	636.2	547.807	119.759	10.3358	-15.5116
Endo-2	20723	6804.5	2406	0	40201.8	92.7614	55.5455	94.5227	1862.28	104.506	1642.02	147	25878.4	1556.11	72.6989	963.716	132.699	182.489	3506.78	1382.74	3841.79	2838.83	3149.59	430.551	91.1136	3348.46	755.642	1695.86	9.77696	-16.931
Endo-2	20755	6814.5	3508	0	21822.5	96.6094	88.8542	39.3594	4515.93	106.891	1440.47	82.8958	11761.9	1388.66	91.3646	1384.69	747.432	139.911	3576.08	1943.71	2713.46	2472.18	3426.35	438.964	92.7344	1511.18	493.839	186.568	6.01378	-14.2958
Endo-2	20761	6810.5	2356	0	24645.4	68.4231	16.0962	5.8141	3242.68	80.4167	881.058	98.718	10489.4	1607.24	108.449	377.955	717.449	23.3077	2968.01	1364.21	2593.75	1335.69	3408.07	279.058	96.0769	678.494	1680.91	137.417	6.13558	-14.3848
Endo-2	20771	6807.5	4247.5	0	34826.8	170.474	8.70513	17.3462	1444.79	153.628	212.821	192.321	25077	1682.5	117.09	512.603	1198.32	18.641	3443.76	1248.44	3715.37	1674.36	1302.37	957.846	115.192	548.769	631.718	138.692	9.61014	-14.8893
Endo-2	20774	6815.5	9209.5	0	43560.9	63.4167	69.875	19	3547.33	127.708	927.756	190.452	7263.17	1309.05	61.2619	490.03	713.196	247.607	4097.08	1428.12	2638.02	3070.22	2454.82	861.649	118.613	1521.07	1293.49	109.524	10.1517	-16.3935
Endo-2	20807	6818	3616.5	0	2697.98	69.375	96.4062	21.4896	2295.82	153.26	11817.9	156.812	12488.6	2072.56	121.49	1064.81	921.125	209.167	6131.49	1150.72	1827.39	1781.32	186.74	799.188	130.531	74.3854	892.604	2683.11	-2.26308	-16.2452
Endo-2	20814	6822.5	8723	0	23346.8	106.21	39.1592	47.7325	2945.89	208.051	3691.32	126.541	15255.9	1444.36	112.994	787.783	565.586	150.828	3233.04	1012.92	2403.32	1717.89	1283.28	545.433	92.7771	548.86	768.134	257.121	3.24641	-14.4289
Endo-2	20816	6819.5	4699	0	35004.3	124.773	25.5341	7.54545	1075.8	124.33	507.67	119.614	21072	1254.39	140.75	870.693	834.045	60.5	3086.97	1931.41	2223.27	2213.65	2938.23	735.784	51.9205	3607.99	749.125	479.83	7.92416	-14.8086
Endo-2	20834	6826.5	4495	0	34253.5	58.1973	24.4626	51.9184	1465.14	114.224	0.408163	113.741	4506.51	1548.44	59.2517	93.3537	562.844	30.3742	3217.2	953.878	2705.86	711.844	1826.26	703.422	124.034	309.095	776.789	86.6803	9.10517	-13.8206
Endo-2	20854	6830	3899	0	29209.3	49.4419	61.8915	16.6202	2763.22	54.124	23.0155	66.3643	12864.1	1724.92	77.907	175.558	298.961	20.4496	1836.02	616.853	2142.47	508.814	1419.96	326.295	58.4109	354.07	567.744	96.4031	8.52336	-12.1741
Endo-2	20873	6835.5	8741	0	33416.3	85.0804	29.196	151.281	2731.96	195.312	3452.04	111.387	23117.7	1356.64	93.5829	1166.61	585.372	211.824	2762.53	644.764	1526.43	2206.2	521.397	197.09	82.593	824.452	846.553	208.834	9.91962	-13.5911
Endo-2	20902	6855	8223.5	0	40890.3	108.205	39.2475	50.9208	3259.04	155.924	1997.54	136.776	22181.9	1266.37	89.9439	1414.67	532.366	269.287	3895.15	947.01	4264.94	2319.72	1067.65	585.271	60.5016	3509.23	866.191	1495.17	10.3373	-16.5251
Endo-2	20957	6859	1311	0	30316	72.2293	0.570732	0	5255.27	151.766	1	127.849	13134.3	1704.6	1374.15	10.1463	4341.86	0	13209.6	1315.74	3825.18	4407.88	280.58	312.961	163.961	382.459	38502.4	110.322	11.8934	-9.70926
Endo-2	20959	6856.5	3788	0	22938.5	66.3681	31.5833	162.882	2733.66	164.125	86.2569	112.604	13534.2	1060.23	59.5347	277.507	252.486	32.0139	2296.67	1821.9	1611.67	1717.79	3108.92	509.535	95.4792	1202.4	819.007	43.4097	6.34633	-13.3628
Endo-2	20974	6862	2803.5	0	20934.7	79.5	2.97619	1.83929	2469.84	136.28	0.369048	101.196	12612.7	945.976	54.3512	240.857	562.833	6.85714	2559.88	849.22	2970.33	1033.8	1194.08	151	62.6012	109.155	1222.88	134.179	7.3214	-11.4333
Endo-2	20991	6860	1322	0	43994.7	63.977	0.298851	0	3392.17	139.851	1.82759	49.8391	18365.7	1555.75	1369.47	41.8736	3393.48	0.114943	8060.76	1675.66	4543.25	5252.69	802.92	208.391	127.126	950.161	18271.5	69.3793	11.0018	-16.4229
Endo-2	21080	6895	2847	0	19514.1	78.9811	24.6288	15.3295	3507.18	128.311	290.682	117.091	9278.41	1648.97	81.0758	176.091	653.981	3.92424	2047.87	1132.99	7212.44	1259.34	1166.19	1026.81	92.3106	154.322	1222.3	109.174	8.47669	-14.5479
Endo-2	21098	6891.5	8368.5	0	30850.9	96.8642	54.7839	34.821	3500.61	244.747	3701.06	157.944	19867.2	1515.08	126.827	966.389	4536.23	154.012	4054.61	1243.35	2240.17	2628.82	1122.54	781.074	132.272	3665.55	6888.2	195.543	7.82606	-16.7209
Endo-2	21103	6892.5	4408.5	0	31855.1	97.5182	17.5912	72.635	3296.77	132.533	1364.35	83.5401	8859.88	1474.43	54.146	525.723	406.073	93.4891	2262.77	764.27	3223.28	977.781	1982.97	743.693	83.9854	572.321	449.277	34.6861	8.66	-14.4981
Endo-2	21106	6903	6587	0	43076.5	81.8058	95.7314	94.7443	2048.5	207.906	4846.8	180.032	18977.3	1813.85	88.1197	1517.8	1226.29	497.233	4395.67	2482.72	3759.59	2882.6	1865.28	1093.89	191.958	676.589	716.191	175.573	9.1968	-17.814
Endo-2	21116	6901.5	1439	0	25418.5	512.537	1.55459	2048.44	2737.38	239.799	1528.68	155.41	22306.2	1050.38	68.3843	800.397	699.86	22.441	3414.45	1260.87	2772.66	3830.89	1462.75	270.581	147.86	299.969	1551.49	972.524	8.45782	-13.0762
Endo-2	21147	6904.5	6481	0	19511.8	69.3009	79.4912	127.947	2861.5	165.637	1857.96	138.102	15147.4	1705.85	89.3584	1375.8	22319.5	185.894	7768.27	2362.83	3187.44	1536.72	1053.79	1014.82	91.5841	1817.86	14315.8	158.504	11.6942	-8.88816
Endo-2	21156	6902.5	8358.5	0	39730.3	89.9433	117.936	91.0993	5168.65	196.17	8465.3	143.929	21495	1711.3	101.915	1472.22	552.028	256.454	3806.3	1676.81	2754.09	2833.65	1854.77	549.085	83.4823	3729.47	1149.23	284.908	7.21748	-19.2969
Endo-2	21170	6914	4346.5	0	31174.1	86.8333	10.8252	17.0122	1249.82	103.878	55.7398	89.5203	6058.67	1089.86	72.9919	155.431	599.992	21.2967	2944.04	1360.84	1658.49	694.85	2502.79	861.667	116.829	499.533	605.439	77.6016	7.81989	-13.1597
Endo-2	21178	6906	8370	0	33079.4	88.0526	62.3772	41.4561	5268.89	238.816	5589.59	345.816	15277.9	1518.72	141.158	801.5	411.702	153.675	3657.44	1087.81	2236.92	2158.02	1270.14	1354.88	139.772	3989.31	235.386	177.193	7.67822	-17.1991
Endo-2	21202	6915.5	10429.5	0	17454.2	82.8098	202.798	58.7853	2893.48	110.423	12442.7	121.626	8468.35	327.644	81.2024	619.264	297.135	270.049	3097.95	806.436	1270.89	2352.02	1507.47	56.0552	99.1104	415.552	1678.76	1223.01	-0.881844	-16.6632
Endo-2	21207	6913	2801	0	15235.7	76.9222	0.388889	0.688889	1190.53	60.4667	1.24444	61.1889	3567.34	984.7	48.4556	141.8	531.433	1.81111	1263.07	432.378	2939.49	605.778	782.122	317.344	47.2889	71.1778	1285.31	96.8889	4.42729	-8.1963
Endo-2	21237	6929	6527	0	28158.2	101.15	42.3656	109.463	2717.37	218.476	2975.85	240.313	14712.4	1803.48	104.978	1346.81	1869	182.471	3793.74	1040.1	1999.47	1142.36	988.612	1328.26	141.678	1453.39	4488.04	244.07	4.22999	-13.9046
Endo-2	21249	6930	5225	0	31640	86.6941	0.427451	0.0941176	3578.77	148.812	784.945	150.231	24128.6	1723.43	275.827	1026.14	2248.63	14.2039	4044.28	1553.55	2872.66	2419.34	638.867	590.686	120.012	1252.64	8392.64	160.722	9.80575	-13.5475
Endo-2	21305	6937.5	8343	0	52323.4	55.7891	125.605	43.3605	3239.86	69.8435	1670.27	66.8163	21897.4	1233.97	44.6871	964.007	464.381	326.007	2502.68	437.844	2816.47	1612.78	344.952	87.8639	33.8844	1167.81	625.225	153.66	10.6159	-16.4683
Endo-2	21320	6950	1455	0	20366.9	330.343	12.4391	883.157	4986.26	387.226	55.9565	367.596	33888.9	1531.33	96.5435	899.387	4009.27	20.613	3421.49	1444.03	3475.14	3283.97	1575.05	1723.79	217.17	171.996	10975.8	276.5	8.1072	-12.7755
Endo-2	21326	6947	1427	0	51892.8	212.481	55.1827	1429.01	4282.95	447.394	539.433	448.87	28596.3	1989.06	186.721	910.745	727.442	399.861	4950.55	936.062	2773.01	2995.03	1179.6	2695.95	305.716	211.115	943.673	133.519	9.98073	-18.3709
Endo-2	21330	6946	10379.5	0	14510.8	99.9804	158.274	108.928	2424.44	125.059	9587.51	143.033	5753.09	850.974	44.0719	578.556	729.948	294.987	2804.15	696.118	1821.31	1437.52	1294.43	397.176	62.5359	47.9412	546.288	4175.52	-0.73435	-17.2209
Endo-2	21334	6948	8327.5	0	27027.8	59.9481	176.63	107.831	4177.5	89.013	4603.55	65.7208	14056.3	1393.06	62.2987	931.74	611.695	413.455	3154.16	710.292	2622.45	1945.79	1826.55	394.968	43.1883	987.981	741.779	121.201	3.37685	-14.9961
Endo-2	21353	6952.5	3434.5	0	46203.5	100.75	9.6	6.37778	4073.43	282.367	1953.61	157.461	21254.8	2694.01	233.428	985.494	255.144	83.5389	7791.71	5004.78	3240.08	3267.49	2105.98	1214.26	172.628	5433.33	284.172	209.65	10.6772	-17.9164
Endo-2	21368	6952	5236.5	0	44311.8	120.929	1.22619	0	1983.77	75.2143	1916.7	77.7024	19873.8	1415.81	88.6309	1178.33	1557.04	3.38095	3341.3	1735.75	2763.51	2648.71	1547.61	124.738	50.4762	2008.96	384.702	133.976	10.3405	-16.1964
Endo-2	21380	6955.5	9091.5	0	32340	80.3333	2.31944	8.54167	1404.53	174.764	658.056	163.444	8742.74	993.736	88.8611	399.625	1010.51	68.8056	1817.78	471.972	1732.29	869.611	1297.49	331.861	101.75	205.528	2398.96	88.4861	9.67707	-12.5226
Endo-2	21382	6968	2978.5	0	25425.5	100.046	214.292	178.954	6568.41	182.941	4473.12	170.379	17157	1904.5	154.511	1011.49	10185.9	219.265	7719.11	1862.48	2719.63	1817.68	2025.49	1029.89	280.037	256.119	14831.9	484.941	3.77956	-14.5418
Endo-2	21426	6969	1461	0	13527	87.5576	4.24848	42.2485	8491.54	300.012	20.1758	290.721	29459.7	1836.48	45.4424	1422.53	3051.38	20.4848	3308.82	1400.79	2678.1	1880.5	4314.96	1824.12	96.297	202.612	4909.71	210.661	2.83322	-12.8604
Endo-2	21444	6974.5	3454	0	22215.3	101.456	34.6513	95.0051	3046.1	168.713	1211.49	135.472	9671.84	1559.15	100.472	453.077	810.574	92.8821	3876.76	1887.89	5034.74	1374.84	1383.82	580.421	92.9744	4947.63	938.421	139.062	6.42119	-13.9741
Endo-2	21487	6986	3001	0	18255.4	63.194	125.821	75.5572	3002.19	267.194	1437.51	147.841	6216.49	1012.47	115.672	116.811	10922.9	11.0199	7033.42	1545.62	3483.12	620.552	1997.95	497.045	247.607	216.811	18594	175.045	6.61023	-11.6646
Endo-2	21489	6986.5	3732	0	17038	53.3684	37.7263	69.4526	2129.81	104.679	1653.45	87.1526	10708.6	1577.96	52.4053	321.984	518.753	150.768	2827.78	1947.34	3745.48	1263.55	2334.38	467.263	70.3737	3199.89	216.263	98.2474	5.93868	-13.6676
Endo-2	21496	6988	8168	0	39185.6	106.656	95.3716	151.634	1961.23	206.197	203.311	94.9727	19511.3	1115.36	80.377	945.656	177.732	215.552	1380.79	442.404	1694.61	1629.97	591.76	289.246	59.7158	585.454	161.142	115.929	10.6515	-13.6335
Endo-2	21553	6998	10449	0	19441.7	132.6	325.453	342.84	3172.17	158.627	10732.5	112.633	22901	960.287	38.54	1218.86	974.68	703.94	2868.31	916.08	2404.01	3143.01	2557.56	597.587	91.9667	400.68	784.053	3684.93	0.261472	-17.5422
Endo-2	21565	6997	10420.5	0	14676.5	76.5476	188.655	175.81	2779.92	75.5952	2862.15	109.69	9817.52	896.167	12.2619	731.917	591.548	380.036	2333.54	690.643	2352.71	2247.62	1492.98	399.286	88.0833	134.071	769.905	335.869	1.05073	-11.985
Endo-2	21584	7006.5	3439.5	0	9931.53	89.3804	18.7011	0	3037.15	250.332	14.5	214.022	17067.3	1508.22	101.723	519.092	664.005	39.7283	5609.05	1901.65	3001.77	2396.75	1983.62	657.924	130.739	861.163	1486.46	157.114	1.4865	-10.6479
Endo-2	21601	7005	4173.5	0	40464	125.75	63.1694	77.0806	4953.7	180.677	1579.43	98.5564	27060.2	1651.28	150.444	1219.84	190.726	199.129	3683.53	1772.22	3749.9	2760.9	2276.39	584.548	74.2984	1155.51	344.815	930.524	9.76173	-16.6658
Endo-2	21619	7012	1311	0	39621.7	81.9482	14.6321	4.36788	5121.76	75.9275	1431.24	76.8912	10894.2	1654.8	44.7513	345.062	295.114	127.01	3823.86	1278.38	4715.17	3791.51	3553.12	279.544	88.1036	435.529	819.264	74.829	9.30473	-16.7371
Endo-2	21625	7016	10374	0	34371.9	79.7529	293.782	152.31	1790.01	67.7874	5145.04	122.207	5724.6	869.942	34.4138	650.172	748.167	511.075	3401.74	633.805	2791.53	1597.24	930.747	444.305	81.4828	407.299	612.954	518.724	3.84942	-15.9748
Endo-2	21650	7019	10422.5	0	14808.1	82.3333	128.822	86.6963	2917.22	118.148	3870.27	119.83	10912.4	1218.31	21.0667	618.674	881.681	273.859	2643.38	653.896	2722.45	2096.3	1375.69	726.311	76.7704	256.437	474.193	1291.99	0.721231	-13.6444
Endo-2	21691	7036	4936.5	0	31936.9	88.3064	48.3575	16.0298	2897.01	83.1277	188.515	165	11687.5	1215	65.0723	682.923	716.077	80.0043	3182.73	1387.72	2160.79	1653.09	649.702	435.66	86.4425	2543.02	829.255	159.328	10.2772	-12.8023
Endo-2	21696	7030.5	1701.5	0	38200.9	83.5259	99.6519	39.4741	1359.64	90.9333	3126	45.4148	12885.2	1852.85	59.8074	1113.75	108.896	31.7852	3053.21	1525.16	2064.53	3220.2	1748.64	226.022	45.363	2549.67	465.896	1706.98	9.46255	-15.7376
Endo-2	21699	7029	5649	0	30100.1	102.644	8.70115	7.77011	993.644	174	557.966	256.287	10017.8	1503.99	207.782	1248.9	1443.24	84.7586	3508.91	3862.14	3518.28	4557.52	2281.55	497.046	176.356	2604.78	1185.64	127.724	9.91878	-16.2259
Endo-2	21701	7031.5	10337.5	0	28577.9	72.305	68.4681	54.2695	1756.6	70.078	2873.01	106.284	8347.25	824.809	19.9645	450.702	621.333	306.326	2641.91	503.397	2494.17	1783.43	775.184	349.652	61.3546	309.241	792.262	264.348	8.78203	-11.9741
Endo-2	21711	7034.5	8240.5	0	8812.29	128.05	160.579	54.4717	3791.58	198.484	1161.71	83.0315	16767.8	1647.02	118.478	765.761	1411.07	107.679	3744.98	873.428	1937.64	2044.36	1707.62	434.792	59.5535	646.472	628.673	138.881	-1.48665	-9.20321
Endo-2	21714	7030.5	8224	0	49487.2	86.8062	169.062	232.054	1655.78	158.054	1372.52	59.8915	13918.1	1486.58	105.581	830.643	563.457	354.101	3713.57	1312.09	1576.2	1961.64	2703.43	444.729	43.5659	3068.79	126.178	481.512	10.0513	-16.3614
Endo-2	21715	7044	2844	0	22832.1	86.4672	13.8433	65.7835	3382.3	115.621	838.496	105.593	16348.3	1207.11	76.2878	770.117	472.043	40.4444	3252.04	1425.66	3213.18	1862.16	2090.7	284.473	90.8461	490.476	1223.85	497.154	6.83634	-13.0046
Endo-2	21739	7044.5	6975	0	43264.2	69.4124	123.603	114.758	3563.06	136.918	8604.65	67.8608	4491.59	1609.51	97.8763	840.366	1236.45	198.711	4538.55	1834.74	2565.31	1073.42	1579.96	313.237	81.2577	1429.72	701.706	153.052	7.03109	-19.5435
Endo-2	21755	7043	2273.5	0	49569	110.566	40.6604	80.5943	1909.63	108.896	135.736	110.094	17657.8	1253.59	38.7453	753.34	693.764	108.198	3363.51	617.821	3170.02	867.962	831.877	382.066	71.8113	595.151	2166.99	83.1415	10.6705	-16.1373
Endo-2	21766	7047.5	1725	0	43932.4	101.421	35.2345	30.3241	757.179	111.579	679.545	110.676	22666.9	1308.14	61.9034	2336.44	150.607	160.228	3954.39	2269.96	3028.65	4004.56	2971.83	436.476	99.6	3298.98	653.89	803.31	10.4693	-16.8633
Endo-2	21816	7060.5	2319	0	36196.9	101.277	50.9322	53.5706	4070.25	78.3164	855.932	129.836	14774.2	1287.49	54.9322	597.35	535.429	63.017	3881.44	1493.64	4538.93	941.898	1586.25	419.486	66.2655	218.305	1733.1	89.7175	9.729	-15.1046
Endo-2	21834	7061	10186.5	0	53851.2	89.6471	127.407	526.863	2325.74	144.137	5094.24	116.245	18919.2	925.328	38.598	1143.43	668.417	440.142	3925.71	2646.01	2493.13	2753.23	3620.86	505.789	46.3529	6194.28	473.681	2258.01	8.00636	-19.0988
Endo-2	21845	7066.5	8084.5	0	29359.6	120.753	46.2273	39.7273	1847.91	135.944	424.54	117.46	18770.1	1159.4	76	810.338	350.848	214.677	2054.37	1042.21	2103.86	1859.04	1663.83	531.192	78.7172	568.298	300.914	130.212	8.94536	-12.3261
Endo-2	21873	7074	1837.5	0	34422	72.3714	19.1952	23.419	1242.36	107.562	121.852	72.6476	14726.6	1352.41	58.5714	985.071	274.167	44.3714	2678.52	1757.25	1908.01	2003.03	3016.43	126.543	65.9762	1389.07	990.581	137.01	7.71772	-14.6314
Endo-2	21874	7071	3425.5	0	9615.49	88.6949	105.559	70.8023	4562.83	197.395	8702.44	208.181	10783.4	2744.79	122.621	771.616	757.565	105.972	3622.14	2744.1	1798.34	3041.66	5258.6	1140.76	182.695	334.881	230.062	150.124	-4.85225	-17.1629
Endo-2	21903	7079	10179	0	26896.6	116.186	133.155	352.418	2297.88	91.4175	2829.29	147.582	12590	1058.75	26.1237	751.371	807.546	295.892	2800.93	2169.39	1483.73	1926.8	2042.77	989.964	98.7062	2278.19	510.675	455.351	7.70215	-12.6334
Endo-2	21929	7089	2095.5	0	23376.2	108.584	3.32653	187.543	2274.4	92.4939	20.5184	160.861	9823.3	1333.44	91.3633	284.249	347.09	17.6857	3215.76	1220.46	2627.76	1462.93	3188.07	489.184	113.273	222.343	1078.98	89.8939	6.19881	-13.9973
Endo-2	21942	7087	2006.5	0	19746.3	80.3	199.553	65.2333	3261.18	106.913	377.667	84.5133	9428.23	1608.11	59.5467	492.867	399.92	240.08	4444.63	1053.59	2513.13	1184.29	2338.03	311.567	76.8667	384.3	689.827	171.64	5.56344	-12.7291
Endo-2	21948	7096	2378	0	28122.7	73.7393	61.7607	21.8932	874.47	52.3291	19.1624	85.6752	11771	1253.27	64.1752	348.556	547.491	69.6325	2943.65	1303.92	1815.09	1260.98	832.603	242.855	74.5726	550.859	906.124	106.94	8.99505	-11.3741
Endo-2	21996	7099.5	5368	0	36011.4	69.0353	50.5059	91.9706	2292.24	97.0177	254.829	115.465	14190	1728.24	176.406	1533.94	368.735	215.294	2840.36	1259.91	3282.46	1515.73	1179.94	791.876	71.0177	1663.76	268.935	160.771	9.77227	-14.9351
Endo-2	22001	7098.5	8766	0	18711.6	100.498	128.859	72.6385	2318.64	203.615	9546.32	165.38	13068.9	1428.36	112.84	983.545	609.563	255.587	3567.38	1396.59	1655	1784.56	1393.38	623.535	98.5868	784.225	745.418	2029.71	-0.163012	-16.5524
Endo-2	22011	7097	4932	0	20070.5	130.299	133.535	59.375	1847.37	78.4514	918.16	119.486	8619.97	1636.62	89.3542	887.431	973.819	205.069	2736.03	1939.66	2153.51	1162.97	3008.07	388.021	109.861	828.979	923.25	128.618	5.58476	-13.358
Endo-2	22018	7108	9134	0	14430	86.3234	52.3035	410.557	4939.32	207.716	5714.49	180.348	7794.03	1477.78	48.0498	697.542	856.861	314.264	3387.37	1733.48	2452.13	1295.12	1318.27	654.293	56.9552	1626.39	788.503	2686.26	0.316587	-14.5343
Endo-2	22044	7109	10111	0	45362.2	68.3824	133.348	325.255	1664.62	63.9559	6693.44	85.6716	8954.61	603.01	34.5686	696.941	436.049	330.103	3684.08	980.029	2374.39	1363.97	2606.63	202.245	35.7843	227.588	453.176	1482.66	6.9676	-18.8791
Endo-2	22058	7114	2069	0	29095.9	51.4746	219.791	64.4746	2102.2	95.0508	173.435	132.294	2163.11	1265.57	81.5424	311.316	1214.64	165.503	2723.47	1078.14	4023.48	578.26	3027.08	674.243	136.638	273.774	711.678	116.864	6.76082	-14.5095
Endo-2	22089	7113.5	8861.5	0	41504.5	71.3636	100.051	28.8586	3663.84	177.828	438.899	168.485	6907.23	1555.98	111.02	532.667	1195.77	114.172	5969.03	815.182	2301.54	1003.75	1948.01	1705.22	214.364	3741.01	2858.32	134.566	10.2835	-15.765
Endo-2	22093	7115	1317.5	0	44632.3	123.241	1.67593	2.08333	3581.94	146.769	398.833	127.787	18864.6	1233.94	119.694	81.1944	144.509	19.213	4574	1034.31	2260.3	2587.69	799.796	686.491	111.87	1286.29	1097.19	1059.3	10.9263	-14.6042
Endo-2	22097	7118	1338	0	50070.7	185.455	37.8909	36.6606	6018.91	301.018	483.727	250.491	20466.9	1820.09	141.424	673.976	121.558	176.509	2798.88	1493.75	3318.9	3931.88	2154.4	1675.17	182.709	3651.95	221.018	924.327	10.7186	-17.3361
Endo-2	22108	7121.5	10148.5	0	18393.8	79.1823	147.106	593.5	2830.57	80.7412	6273.13	92.8118	10708.3	826.723	19.8	669.165	600.524	344.641	2439.56	2347.24	2177.81	1746.05	1265.02	373.153	82.6353	947.306	514.923	1726.1	0.87654	-15.2798
Endo-2	22111	7132.5	1846	0	39057.8	81.9958	50.4792	26.95	4820.71	154.604	890.392	101.233	14820.1	1501.09	54.6708	911.558	293.396	57.6083	5824.54	3641.36	4016.37	4104.27	6484.96	204.308	105.95	1659.2	629.121	284.133	6.51712	-16.4246
Endo-2	22120	7125.5	1321.5	0	28631	118.583	5.78205	6.46154	6627.1	283.936	492.506	166.686	14845.4	1705.56	120.147	271.282	234.821	51	3503.08	922.609	2603.19	2644.97	1166.47	1257.79	168.519	1192.6	471.096	1469.72	9.38333	-13.0153
Endo-2	22121	7124.5	6537.5	0	53534	90.812	135.391	162.143	4588.5	241.662	8787.39	193.489	7915.23	2030.89	120.211	722.143	1450.98	354.774	4393.46	2201.75	3637.01	1334.65	2437.71	988.624	172.406	601.97	624.594	758.038	7.13698	-20.634
Endo-2	22139	7130	8815.5	0	35751.3	62.2356	38.0977	50.2586	2034.59	149.086	2527.56	90.1609	14170.9	1331.37	100.557	709.431	538.787	246.586	3066.21	846.253	2101.54	2011.65	521.431	204.759	73.1897	255.322	687.264	169.914	10.0387	-13.784
Endo-2	22150	7135.5	2424.5	0	25494.7	50.7212	25.1758	25.8485	438.212	69.497	1137.7	85.8	12108.6	1365.35	90.503	430.133	683.133	53.6485	2433.4	1037.08	1608.22	1869.21	811.327	171.806	65.303	441.564	1088.22	94.7818	8.3198	-10.9972
Endo-2	22158	7135.5	7701	0	20181.9	53.142	59.7219	65.6805	4064.62	162.243	6049.27	185.107	14353.5	1256.65	78.8935	1455.79	141.124	190.42	3368.8	1138.84	2030.81	1647.37	1295.9	587.734	152.503	559.438	123.243	193.479	1.49707	-15.124
Endo-2	22232	7144.5	2216	0	43221.5	103.452	0	0	1131.46	97.5833	0	125.821	30369.3	822.869	23.9762	604.083	3507.05	0.119048	3017.79	1295.96	2101.4	2744.61	4962.86	770.548	127.512	386.595	7146.32	146.31	7.7135	-16.1325
Endo-2	22239	7150	8811.5	0	49536.3	82.6644	47.906	46.094	2923.41	160.054	3014.91	142.752	11975.3	1422.19	97.3154	779.651	811.644	320.221	4225.95	1300.68	2847.83	1903.13	1153.19	546.671	62.3624	1033.62	967.711	146.383	10.122	-17.0116
Endo-2	22279	7170.5	2380.5	0	28279.1	67.0152	79.9735	40.0114	435.92	59.2576	58.8939	83.0833	18193.4	930.89	53.0227	725.712	539.333	115.947	3178.44	574.591	1513.73	1735.64	357.731	192.78	70.6932	550.11	921.42	108.265	9.081	-10.4661
Endo-2	22282	7163	1928.5	0	46718.5	91.6903	3.69036	2.22335	1943.23	101.299	4.49239	73.8325	11325.8	1741	78.6548	87.6345	359.406	68.4518	5295.7	1946.82	2993.75	2760.15	1713.73	191.193	59.7056	1585.12	754.315	86.7665	10.408	-16.3276
Endo-2	22309	7170.5	2910	0	37163.8	64.9435	0	0	3829.49	139.78	0	130.701	10046.7	1025.99	98.8814	55.0847	3866.76	0	3013.05	1165.4	2651.41	1593.87	245.362	287.763	110.853	219.814	4241.97	135.864	10.8256	-13.5806
Endo-2	22313	7169	7964	0	46232.7	94.9231	54.1978	18.7637	2554.02	170.901	1742.58	124.198	21956.9	1458.36	59.2308	1824.49	817.918	323.418	6053.34	2466.3	2252.99	3932.88	1521.33	695.577	84.4945	468.352	811.659	968.67	10.5238	-16.716
Endo-2	22315	7167.5	1016.5	0	29476.6	56.6893	30.8983	15.3729	3291	84.6893	1.56497	70.1582	14947.2	1388.01	55.5763	599.48	301.006	136.565	1456.28	212.006	2126.65	1402.29	912.898	265.311	70.8362	67.0508	511.441	94.1299	9.17109	-11.9018
Endo-2	22325	7175	2072.5	0	42546.8	71.6479	4.60563	2219.37	2648.24	85.5739	446.166	128.94	11510.4	1170.12	89.8239	311.236	305.778	15.0493	2786.82	765.979	2688.65	1368.36	1284.67	242.849	100.134	557.468	983.303	113.567	11.1289	-15.4066
Endo-2	22328	7172	4381.5	0	51616.1	158.629	89.7746	56.3944	2471.7	95.4648	2722.15	97.6948	12689.7	1779.51	44.6854	731.798	682.624	228.657	6890.49	2396.27	4048.54	2276.98	1202.89	539.47	57.5634	2909.77	693.944	2588.69	10.0906	-17.8925
Endo-2	22371	7185	2879.5	0	34923.1	73.0141	6.97183	7.1784	2601.84	147.202	24.7746	138.296	13322.7	1077.28	181.357	321.981	1054.31	34.4648	3059.24	1409.62	3340.7	2211.53	1542.81	835.136	229.714	476.798	1590.34	163.385	10.3237	-14.862
Endo-2	22407	7192	6689	0	24877.2	59.3475	65.6099	108.043	1372.68	117.631	83.0355	127.142	9819.64	1209.78	53.8227	1119.29	768.028	294.262	1934.92	684.057	3315.02	461.851	1506.38	503.319	103.745	107.383	213.553	83.4326	7.26981	-12.1082
Endo-2	22423	7193	1326	0	27707.9	83.5157	27.6667	31.1321	1363.18	85.7484	207.868	87.6101	13657.2	1501.95	51.4214	365.906	168.805	122.975	2007.48	588.327	2325.31	1329.75	1623.51	316.044	100.151	331.208	692.151	93.1509	8.42817	-12.1528
Endo-2	22431	7205	2895	0	25069.5	81.9299	2.24766	0	2852.02	168.692	0.96729	214.5	14651.5	1383.07	183.411	227.164	1028.7	0.140187	3680.37	1564.32	2365.1	2064.43	1382.06	662.491	142.78	366.673	1932.93	179	8.0992	-11.9341
Endo-2	22474	7210	1352.5	0	24314.8	84.1452	21.8871	22.0161	2532.58	218.71	75.5	205.29	16041.1	1559	111.427	365.694	36.5081	121.621	1327.39	1037.52	3757.84	1461.66	1711.59	1233.66	179.976	571.048	70.9677	83.121	6.66246	-13.3254
Endo-2	22480	7213.5	7927.5	0	37680.1	142.677	81.8042	25.0794	3713.34	251.735	3816.48	184.847	19959.7	1707.23	76.6984	2067.39	854.407	373.444	9711.21	2873.15	3668.95	4624.91	1459.81	853.778	220.048	1975.68	397.857	610.058	9.72041	-17.4544
Endo-2	22492	7211	3399.5	0	28767.1	40.0435	88.9855	160.522	1133.9	119.536	399.928	174.145	17157	1040.36	137.217	1523.12	525.913	341	2467.35	717.913	1051.43	2948.17	2490.01	529.652	145.406	1514.91	1212.96	101.449	7.78108	-13.1584
Endo-2	22499	7214.5	6549	0	8434.27	92.7071	97.9495	158.333	3194.31	154.818	13627	147.859	28631.6	1185.12	66.9394	1969.54	815.111	565.596	1463.38	445.04	1393.74	2621.56	542.758	698.414	113.98	124.222	820.061	1347.21	-1.64483	-16.6262
Endo-2	22530	7224	3556	0	22484.7	49.7667	147.911	213	1485.72	131.7	4736.51	102.733	7424.77	831.233	7.88889	522.6	146.322	253.456	857.689	685.8	1105.94	433.467	1642.28	829.433	92.2111	1221.6	68.4889	215.978	2.62002	-14.646
Endo-2	22546	7228	2871.5	0	48345.6	112.569	5.89216	5.01961	2282.99	450.078	2297.67	318.833	39510.4	949.216	84.2843	1985.61	1020.9	101.186	6091.04	2658.38	2715.95	5257.4	1507.75	1520.25	276.814	2645.35	1745.96	1731.93	10.7511	-17.2087
Endo-2	22555	7236	7925	0	42231.8	103.515	56.197	15.0303	3493.77	268.763	4577.16	146.692	22717.4	1539.61	91.7828	2067.92	760.359	461.753	5388.18	2412.96	4148.98	4372.24	1716.06	825.485	127.192	1664.33	402.823	1352.37	9.63077	-17.6343
Endo-2	22567	7235.5	2876.5	0	49610.7	95.0417	24.5	0	4811.31	346.367	2725.2	160.958	26412.2	1306.8	95.3	1135.39	164.95	95.425	8914.48	3443.49	3833.97	3322.64	2483.52	1376.26	219.142	2713.73	636.183	1916.32	10.2694	-17.8582
Endo-2	22576	7239	2858.5	0	30585.6	70.1765	30.2092	5.05882	2558.98	172.954	539.255	299.34	31254.2	1199.95	157.294	1466.38	1355.86	191.614	4414.27	2011.16	1974.94	3651.02	2122.45	1463.06	174.601	1608.46	2358.92	223.118	8.63525	-13.6341
Endo-2	22600	7249	6552.5	0	36452.8	100.261	121.115	192.642	1334.73	155.758	15633.2	181.109	24587.5	1572.4	88.3879	2514.02	997.206	834.57	3353.88	1575.4	5761.88	1800.02	618.539	974.03	138.745	1816.89	231.006	1181.81	5.71413	-22.5868
Endo-2	22602	7255	3937	0	12253.4	51.6846	17.1867	331.427	2027.07	177.809	8.89212	103.112	9733.57	1373.92	165.075	33.1328	1381.19	0	4681.24	1866.55	2118.71	1557.39	109.278	527.486	113.494	1507.86	31274.4	118.971	-3.63031	5.12496
Endo-2	22716	7275	3931	0	35022.8	110.878	29.513	69.6435	2810.23	202.626	19.4609	164.513	7385.84	2447.52	264.974	21.7304	2123.47	0	6017.94	1633.74	3395.99	1146.3	445.226	761.826	158.722	2003.6	33232.2	94.8348	12.2519	-9.58535
Endo-2	22767	7290.5	4478.5	0	38605	94.9282	32.4974	38.9436	1055.1	103.59	86.6051	75.9026	10257	1207.24	58.9795	361.954	450.882	118.123	2950.58	1347	3944.46	2369.39	1147.38	357.892	69.6154	859.031	580.595	111.564	10.4055	-15.1137
Endo-2	22849	7312	6531.5	0	33434.1	75.2667	183.178	175.689	5155.29	232.511	5337.45	221.833	14038	1851.68	84.7889	1879.31	1970.72	502.639	3910.13	1473.57	3985.4	1624.21	2205.35	1153.4	144.639	633.006	380.572	85.7333	8.438	-17.2706
Endo-2	22924	7329	5346	0	28594	76.9533	11.1533	231.673	3163.39	184.493	4509.3	222.407	12224.7	1983.15	102.387	1193.75	895.553	95.98	3464.55	2845.67	2449.06	994.973	1431.65	955.2	79.5133	2618.6	444.313	98.52	3.91075	-14.5669
Endo-2	22931	7333.5	6039.5	0	36412	80.1858	40.3716	90.1202	1307.04	85.1257	13.2623	137.628	15571	1243.38	50.7104	1872.39	563.24	58.5956	2843.07	1207.69	2376.77	2732.73	894.268	235.262	63.1475	2807.34	310.891	75.7869	10.7233	-14.0405
Endo-2	22959	7330.5	5333.5	0	18108.1	72.1528	53.2361	41.1944	3134.42	223.653	4201.64	180.431	12741.2	1083.82	73.3194	837.583	920.278	112.944	2099.01	1288.47	2010.17	1227.83	1807.43	949.847	123.917	662.208	557.222	78.2083	1.54285	-13.0884
Endo-2	22978	7342	5270	0	26038.6	74.5053	15.2	11.9526	1504.39	85.6579	151.184	91.9526	14380.3	1141.34	55.1579	745.553	581.3	95.1368	2725.19	1107.96	3084.69	954.442	2375.01	221.011	68.9158	699.863	854.479	65.5474	6.97275	-12.9086
Endo-2	22982	7344.5	9169.5	0	19152.3	89.1033	28.0376	15.4225	2975.69	136.549	258.347	185.718	11185.6	1295.22	60.939	682.146	827.451	158.484	3034.11	706.563	3208.43	1397.43	1743.79	579.681	122.211	320.038	898.737	135.39	6.35276	-12.285
Endo-2	23016	7346	7136	0	18000.4	81.7333	54.3037	116.111	2537.09	276.096	465.57	179.933	15081.9	1756.2	89.8444	1327.7	1370.27	298.941	3488.66	1134.93	2092.99	1410.02	1605.13	1593.26	155.8	973.474	712.718	129.83	4.83702	-12.5576
Endo-2	23017	7350.5	7201	0	31660.1	72.579	107.14	30.614	577.018	67.883	1200.56	131.924	11616	1322.81	74.0175	1018.07	1264.02	99.2573	1928.92	429.602	1693.64	864.316	667.269	491.655	68.5029	252.801	3813.4	112.135	9.55024	-12.4851
Endo-2	23018	7345.5	8456	0	45200.5	118.402	131.444	155.872	2504.26	221.085	3451.76	117.769	7300.52	2708.98	121.291	499.94	162.128	284.786	8145.67	1903.81	3272.74	1693.8	1427.64	434.872	41.2393	110.838	234.376	157.316	9.40479	-18.7744
Endo-2	23034	7354	3864.5	0	42395.7	83.1255	129.805	1424.67	2386.82	164.892	4524.39	111.71	15798.7	1199.91	87.1905	824.84	702.615	257.675	3902.45	2036.93	3594.61	2415.56	953.03	604.758	98.0087	2140.82	757.983	277.667	10.2881	-17.6287
Endo-2	23086	7364.5	3846.5	0	15555.9	64.0325	187.61	642.539	4864.78	114.182	7468.02	72.6429	13982.2	1207.34	58.1623	815.266	596.818	181.331	4332.39	1525.29	3947.33	1579.25	1023.58	472.942	65.3312	1433.07	668.019	299.208	1.17567	-15.0563
Endo-2	23102	7377.5	5424.5	0	35116.8	126.524	52.348	65.28	4344.22	197.576	1954.68	161.6	29413.4	1513.29	92.232	2483.92	959.928	504.496	5203.67	2929.98	4479.78	3893.73	1721.09	712.992	108.036	1414.47	780.604	101.368	9.86953	-16.5756
Endo-2	23103	7370	7170	0	30189.7	94.2569	90.2292	138.083	2850.6	135.576	301.458	166.792	7074.25	1655.12	73.3194	369.438	1241.15	174.639	3079.83	326.243	1794.62	1031.19	472.562	929.007	122.569	1128.39	499.729	104.701	9.1146	-12.5459
Endo-2	23106	7368.5	1934	0	28419.2	57.2319	33.3696	2.15217	2121.22	102.514	18.7536	69.2029	4872.46	1106.36	74.7899	116.29	304.188	31.6087	2220.11	745.21	2500.06	663.804	1390.27	160.399	50.1957	371.957	1028.07	98.4058	8.41413	-11.8332
Endo-2	23137	7379	1134.5	0	19018.6	89.0545	24.1455	17.8227	3070.27	228.595	80.8909	254.041	36850.7	1558.5	144.714	1006.45	382.573	86.7909	3863.61	1172.05	2073.28	2777.45	1283.76	812.268	121.836	197.309	1519.2	305.873	5.46734	-11.2643
Endo-2	23141	7380	6078	0	20455.2	93.3774	23.0142	27.2783	1557.61	149.16	255.566	152.722	24276.3	2148.04	192.448	3575.69	3462.4	198.368	4125.66	732.297	2949.77	1140.9	725.198	983.91	154.33	458.283	9763.32	109.401	4.70218	-12.2864
Endo-2	23167	7387	7225	0	30941.3	47.0417	28.5069	67.6528	3441.67	137.618	490.347	153.132	2932.23	912.66	54.8403	516.785	433.549	172.41	3203.18	758.118	1704.15	585.826	873.729	499.757	114.701	264.688	301.424	128.361	9.57903	-11.6113
Endo-2	23182	7397	8641	0	22610.3	76.2792	151.68	156.69	2297.2	153.523	2763.34	109.518	7500.41	1260.05	85.5888	579.299	720.985	289.416	2163.91	504.904	1753.36	648.35	1494.43	470.01	81.1269	387.563	695.503	129.756	6.42426	-11.5011
Endo-2	23224	7399	1080.5	0	39944.7	141.554	30.2316	209.254	903.113	74.8983	32.548	97.226	16344.1	1316.23	64.7232	830.667	323.446	84.6441	2263.73	911.288	1588.83	2067.55	1348.94	233.475	70.0622	739.079	1018.15	78.5763	10.6029	-13.9106
Endo-2	23232	7405.5	2592.5	0	29467.2	66.212	155.56	40.5435	2613.73	114.283	44.5761	165.908	19947.2	1731.64	102.299	1352.4	476.13	195.978	3383.58	1389.59	2402.34	1404.36	937.902	783.728	92.5435	182.745	645.424	86.3207	8.89521	-12.7587
Endo-2	23239	7403	7547	0	10071.9	70.7955	0	0	2973.55	228.311	2.69697	216.432	15239.7	1233.05	109.432	114.114	1648.64	0.00757576	6450.77	1138.98	1693.19	917.409	181.288	568.341	164.758	286.894	37974.5	118.182	-7.36692	9.28874
Endo-2	23259	7415.5	4776.5	0	20390.3	216.026	47.0257	7.375	4342.37	144.688	102.11	131.908	20907	1416.42	216.993	682.283	7656.4	28.4007	3451.22	1056.97	2290.56	1590.41	208.059	347.327	117.982	351.647	1085.04	229.676	6.36768	-10.7901
Endo-2	23276	7410.5	1949.5	0	38499.6	92.2154	0.5	5.45385	2112.65	185.931	1319.81	109.092	32239.2	1110.72	77.2462	308.908	302.392	13.5692	2935.27	921.415	3427.72	1449.32	737.723	472.592	165.962	2330.2	1438.31	99.8	10.47	-15.0749
Endo-2	23288	7412.5	1112	0	25014	273.307	107.627	309.4	3697.93	103.12	14.44	127.96	25039.5	1444.21	89.7467	1178.03	221.2	139.253	1813.12	1006.07	2547.4	2318.01	764.24	305.24	80.3067	200.773	804.68	144.4	8.2813	-12.3231
Endo-2	23303	7417.5	8397	0	13335	67.2895	207.325	126.518	2554.97	137.412	8602.41	141.307	37539.7	1287.94	63.8509	2087.95	114.377	696.368	1557.61	711.263	2704.61	2313.68	1010.29	400.623	98.0439	596.649	340.07	576.421	-0.911174	-15.7297
Endo-2	23323	7421.5	10345.5	0	25180.4	29.7667	6	57.1	1115.4	18.5667	57.6	32.0333	4318.93	65.6667	5.65556	35.0111	95.6889	73.0889	832.7	220.222	1035.56	581.7	143.933	47.0222	34.4667	364.578	221.489	68.8555	8.70872	-8.803
Endo-2	23325	7424.5	4467.5	0	47191.7	94.661	65.0508	131.367	3034.73	176.605	2860.53	134.362	31592.6	1488.54	108.616	1921.11	376.158	240.836	4561.26	1775.55	3835.08	4595.34	1241.86	1106.76	191.944	2321.06	719.723	112.825	10.4167	-17.13
Endo-2	23392	7442.5	1920.5	0	35588.6	85.5259	35.3111	71.2222	953.111	172.215	62.1259	133.467	13897.4	1234.16	60.7259	605.111	689.704	156.356	2510.45	943.718	2062.57	2629.93	1568.1	718.637	124.711	1597.41	841.97	70.3555	10.3541	-13.899
Endo-2	23412	7448.5	7817.5	0	49995.4	62.4302	1.26163	3.5814	2764.06	132.849	16.2733	106.715	11780.3	958.529	88.7558	437.343	916.32	4.44186	2916.57	1082.63	2717.58	1587.23	185.663	458.907	130.087	193.605	2825.53	105.68	11.2295	-14.7322
Endo-2	23439	7455.5	2300	0	47347.6	81.3155	134.857	91.5417	3130.43	105.976	4450.67	116.25	17660.7	1359.99	92.7917	604.506	606.202	148.762	4621.1	2803.54	2131.99	1809.71	1799.21	406.113	114.196	1017.17	1304.4	1743.77	8.1623	-18.2577
Endo-2	23464	7463	2777	0	38474.4	63.6184	6.63768	3.74879	1513.54	145.903	28.5652	115.797	26485.1	1053	75.1739	1068.96	2035.52	33.5894	2369.45	985.406	1878.49	1721.13	299.638	345.184	125.522	273.15	3706.38	139.338	10.8194	-13.5281
Endo-2	23466	7458.5	4445	0	24248.7	77.5699	10.9355	12.1935	2141.87	115.785	10330.5	79.5269	28390.5	1148.71	40.9785	1065.74	47	207.022	2142.43	1172.83	2743.57	2588.66	1263.03	144.613	71.8387	493.387	80.3763	2093.82	0.932029	-16.8284
Endo-2	23473	7467	5341.5	0	26312.2	57.8922	24.3431	24.0343	479.412	58.8578	59.8627	125.696	6127.82	1366.82	98.5392	464.892	541.039	122.196	1519.17	792.49	2020.51	1056.13	927.358	139.76	49.1618	471.284	397.902	185.059	8.67874	-11.3394
Endo-2	23475	7462.5	7813.5	0	48850.9	48.5644	2.47853	0	2731.61	204.804	21.0798	160.558	10571.8	919.89	76.7853	293.914	1137.87	3.17791	2802.34	1094.99	2618.76	1428.51	357.865	500.736	97.8466	182.166	3072.4	159.196	11.2275	-14.6645
Endo-2	23482	7465.5	3009.5	0	43943.7	77.718	48.3846	18.4679	2924.27	136.103	6.37821	128.904	10611.1	1250.4	88.0641	871.218	402.5	86.6603	5675.67	4042.18	3688.92	5261	1844.68	424.974	144.641	2610.47	831.096	38	10.7219	-16.9616
Endo-2	23510	7477.5	4823.5	0	29515.5	111.033	0.173554	0.334711	2933.93	128.736	284.211	158.839	20259.3	892.43	195.178	166.599	18818.7	0.438017	7085.55	2315.37	2195.14	1913.23	191.041	255.132	111.368	534.322	19055.1	118.136	10.6969	-10.1288
Endo-2	23564	7482.5	9485.5	0	27373.1	202.583	16.0139	613.514	1435.58	150.667	593.653	102.361	8743.86	973.208	66.0417	480.264	56.0417	210.417	1085.14	324.403	1393.61	813.917	504.847	662.917	66.75	280.681	71.9583	83.6944	9.28399	-12.2483
Endo-2	23569	7491	5155	0	31658.8	63.9365	14.3492	27.5661	3101.43	119.434	26.0265	136.534	5619.05	1369.33	59.4868	220.058	867.566	96.2222	2390.29	798.809	3512.9	903.566	673.444	610.095	74.8095	1589.86	497.275	82.418	9.66705	-14.2306
Endo-2	23570	7491.5	5330	0	34142.5	93.2092	107.245	31.8418	1969.95	74.3725	1693.35	111.408	9115.3	1358.12	62.8418	754.347	549.464	382.153	3214.67	663.26	1761.02	1932.63	1128.01	196.622	43.9694	299.974	410.954	2849.1	10.0574	-13.1136
Endo-2	23582	7490.5	2816	0	45579.6	78.6601	5.32026	0	1419.1	111.993	63.0261	76.6274	8485.56	812.588	97.4118	530.235	160.719	8.69935	2148.03	1191.65	1948.78	1269.55	697.608	373.379	125.739	511.758	415.497	89.281	11.0246	-14.1872
Endo-2	23590	7488.5	9481.5	0	32414.8	280.54	33.9206	761.175	1191.22	146.683	709.111	203.016	7242.24	1079.19	90.4127	496.952	65.7778	346.016	2423.08	313.381	2004.97	790.968	829.921	469.746	69.9683	316.19	82.7936	96.3809	9.25885	-12.6913
Endo-2	23592	7497	2861	0	41178.3	78.0868	4.75799	5.31963	1246.18	140.621	26.4201	120.402	20170.8	1194.75	120.155	613.74	147.904	27.5114	2546.22	1073.63	1545.8	2378.89	638.091	439.274	108.977	299.913	820.21	168.735	10.8009	-13.8306
Endo-2	23615	7503	4368	0	37207	99.4873	36.2437	59.9036	2201.27	174.056	63.0863	185.071	17266.1	1256.03	80.4315	1011.63	776.462	133.67	3698.38	2445.01	3622.55	2708.08	2422.58	1413.86	190.426	2295.93	872.635	111.401	9.83456	-16.1437
Endo-2	23633	7500.5	5342.5	0	35470.6	96.0593	66.6445	41.3704	1575.53	50.7556	1936.1	85.037	7595.97	1417.86	59.8296	690.689	553.422	342.133	1969.76	314.222	1484.93	839.319	928.756	221.785	57.2444	481.756	339.6	986.978	10.0599	-12.9596
Endo-2	23642	7506	3837.5	0	17293.6	99.21	93.3927	93.0776	3916.55	204.872	1941.96	316.164	17746.6	1929.03	109.735	513.023	684.206	158.918	2179.08	677.877	3328.16	1292.16	466.936	1604.32	236.822	425.292	806.941	1646.64	4.13869	-12.5851
Endo-2	23643	7506	6906	0	43839.3	96.8636	72.5974	95.5909	2132.53	430.435	5575.56	257.799	6571.68	1798.24	82.3312	716.513	1308.29	237.013	4565.99	3454.11	2739.4	1547.12	4139.4	1270.28	124.909	206.565	359.162	902.721	7.75055	-17.9454
Endo-2	23697	7527	5947	0	41390.1	98.3682	67.1642	160.174	2420.12	269.219	2230.86	196.612	26275.5	1468.99	66.6866	3037.31	790.975	546.483	3921.3	2189.34	3282.5	4521.68	2859.4	1094.74	140.363	6813.22	544.005	195.995	10.9254	-17.1974
Endo-2	23713	7529.5	3830	0	18337.4	129.667	141.319	118.72	2941.33	149.937	1008.99	163.13	13037.3	1559.28	119.493	694.425	607.701	203.585	2231.35	804.386	4536.37	2040.52	1055.04	822.657	159.193	542.459	864.802	495.28	6.52832	-12.8384
Endo-2	23747	7539	7067	0	30914	80.4115	120.521	185.932	2768.92	156.875	2414.85	168.708	13778.3	1452.03	57.9062	1241.74	1221.59	215.167	2958.62	947.656	2319.18	1134.99	3229.6	545.573	142.833	432.323	722.865	530.255	6.73347	-14.9493
Endo-2	23787	7544.5	2502	0	39341	68.9532	47.8187	69.2515	566.205	103.468	143.07	105.596	24267.3	994.158	46.6374	933.801	564.222	172.52	3342.99	2016.92	3200.5	2891.59	1976.65	235.023	89.8363	296.69	1346.06	119.064	10.3058	-15.4794
Endo-2	23790	7540	5431	0	7938.17	121.471	74.2529	46.092	2284.41	60.3678	121.046	97.7816	4775.33	1468.8	108.161	280.368	380.172	73.6207	3522.92	994.908	2684.22	512.92	1733.2	169.966	47.977	104.218	662.586	102.333	-0.2669	-7.6999
Endo-2	23794	7542.5	3959.5	0	26270.6	70.8302	2.30189	2.87736	4157.59	219.208	1629.25	197.425	18824.1	1263.59	108.708	936.953	6270.47	7.37736	3530.45	2359.26	1997.17	3087.75	2160.94	1049.93	243.038	415.84	14826.7	442.953	7.52446	-12.754
Endo-2	23795	7541	5949	0	13832.2	131.253	31.9425	7.64368	5196.11	264.609	404.103	245.241	25160.7	1451.76	74.5862	2541.72	747.425	398.402	3096.82	1111.98	2800.82	4256.26	1498.57	1062.46	199.471	2200.05	602.563	247.322	1.69577	-10.7501
Endo-2	23796	7548.5	7246.5	0	8898.19	77.5714	27.7761	11.4286	3104.47	108.201	664.529	165.68	8861.25	1516.44	68.0734	1019.39	1004.35	184.541	3657.11	1033.82	2206.18	822.772	2118.38	796.838	110.683	352.51	695.402	124.008	1.39112	-10.1724
Endo-2	23817	7548.5	3967	0	21361	100.22	0.66	5.5	3442.26	496.89	128.87	212.45	13621.7	1956.89	173.26	147.83	6018.97	8.15	4456.22	1951.45	1883.94	2464.13	1685.3	2201.25	385.52	352.61	15452.9	196.97	4.79923	-12.7229
Endo-2	23828	7556	2421	0	47838.2	95.1146	19.276	7.99479	1331.69	105.859	449.068	87.7812	18187.4	813.969	67.5521	656.417	498.99	115.359	6812.21	2486.65	2746.16	2171.46	1608.89	368.078	87.1979	2436.7	1226.71	131.729	10.8046	-15.9494
Endo-2	23829	7561	5455	0	23953.1	70.3202	115.228	50.0132	1015.23	86.2807	43.8333	96.5263	6546.91	1489.97	90.8158	445.342	431.873	110.425	2143.33	1791.82	1784.49	1058.06	4499.5	156.557	62.2237	99.807	380.728	99.7368	5.97933	-15.0794
Endo-2	23849	7567	5315.5	0	41787.6	72.7689	88.9689	99.1156	1328.32	114.707	201.493	105.231	5906.23	1373.3	79.9022	430.196	588.956	1225.64	2390.8	967.2	1844.39	1624.24	1771.43	239.133	46.76	733.147	439.591	74.0844	10.2957	-14.9442
Endo-2	23885	7573	2446	0	37555.2	118.495	9.56019	4.82407	1519.44	116.13	3031.09	116.194	26139.3	1172.97	64.3843	1040.81	568.014	34.6435	5667.83	1810.39	4252.58	3461.84	1295.19	135.019	92.2176	2033.62	1269.11	155.292	10.0508	-16.5349
Endo-2	23893	7572.5	9027.5	0	47963.4	62.9014	55.0563	141.937	988.493	123.655	1183.09	68.5	13107.2	982.451	111.901	1051.11	111.275	205.465	3545.63	1151.73	2367.5	2377.08	1064.15	193.817	52.1268	1147.74	616.648	102.901	10.7475	-15.9336
Endo-2	23907	7579.5	2527.5	0	42403.3	85.4976	21.0386	65.4734	1970.15	97.5169	284.952	125.512	27667.2	1055.86	75.2995	702.13	296.256	34.1787	3009.72	958.647	1624.69	1880.53	728.285	410.647	122.164	2031.64	916.261	85.3816	10.8717	-13.9622
Endo-2	23912	7578.5	2468.5	0	27519.1	101.711	6.50289	4.50289	1905.61	157.873	3845.68	140.347	27791.3	1302.3	108.555	671.341	495.006	38.237	4394.92	1998.72	2064.71	3030.77	1601.18	275.543	138.491	2182.72	1280.56	144.647	3.64334	-14.8015
Endo-2	23925	7585.5	4026	0	27031.5	81.1791	1.76617	10.8159	2151.18	185.552	895.03	240.841	14079.8	1993.71	178.189	696.244	623.114	99.2289	2929.61	808.582	2690.3	1211.58	440.736	1470.32	183.751	464.801	311.413	103.289	5.29408	-12.8881
Endo-2	23954	7591	6911.5	0	24947.6	71.7276	19.122	2.45122	3385.76	157.549	10835	88.3049	20025.8	1382.27	96.3008	1769.1	1953.93	61.4553	3780.27	1363.79	2599.03	1764.15	701.943	332.935	76.3415	90.3415	7906.15	332.691	0.96223	-16.712
Endo-2	23959	7586.5	8406	0	36567.6	106.894	64.5366	71.813	1726	126.87	3518.96	77.2845	10144.7	1275.48	81.8171	540.813	605.545	206.159	2699.66	1353.83	1808.3	1398.68	1700.79	408.939	64.1057	249.146	657.354	3189.9	7.0315	-17.8844
Endo-2	23963	7594.5	6308.5	0	49159.7	113.764	36.0207	19.7645	2450.95	131.628	1655.13	106.95	16849.7	1283.48	51.1818	1497.01	1060.95	299.455	3150.31	1208.95	2584.82	1746.25	1046.5	319.628	106.021	1004.17	822.364	4253.74	9.66766	-17.2754
Endo-2	23975	7587	6648.5	0	51514.9	52.6957	20.2899	67.4638	916.406	100.159	3580.3	41.6522	10836.2	1094.61	21.5072	887.522	478.913	134.87	4381	3245.1	2784.8	2437.45	759.812	194.362	44.058	1285.01	453.478	565.304	10.1861	-17.2013
Endo-2	24005	7596.5	10422.5	0	34204.6	74.789	93.9908	137.073	2198.22	69.2294	2017.46	94.055	9721.64	742.266	20.6422	654.459	489.771	223.606	1992.73	401.459	4053.27	844.046	1459.92	187.596	28.422	171.972	502.037	74.7431	10.3444	-14.7716
Endo-2	24013	7603	3033	0	30496.9	26.881	101.53	81.5417	1057.71	131.256	66.0238	77.3691	15275.6	946.607	92.2381	222.315	300.875	133.899	2070.78	703.958	1522.23	1407.3	658.821	309.488	121.363	203.185	719.488	102.56	9.56849	-11.462
Endo-2	24029	7607.5	4025	0	19835.9	93.6931	0.881188	21.5396	1953.54	208.292	6124.98	183.233	36513.9	1750.83	100.807	1333.83	1637.93	48.6683	5569.66	1887.48	2192.06	3149.87	811.951	985.663	189.97	328.025	1021.01	169.267	1.50914	-15.2563
Endo-2	24063	7613.5	5857	0	52584.1	130.2	28.68	5.09	820.68	80.89	628.84	140.02	6208.07	1394.75	82.66	677.93	679.64	120.43	4157.66	3164.7	1829.4	1004.42	1841.69	263.83	71.87	2364.01	622.55	60.4	10.4168	-16.3704
Endo-2	24064	7620.5	6867.5	0	25156.5	67.0483	0.729469	5.26087	2908.32	121.444	3956.76	122.879	12186.3	1108.09	87.0145	855.725	503.913	101.14	2877.22	1451.26	2401.94	1817.64	530.155	275.222	100.797	63.8841	759.638	201.488	3.43103	-15.0008
Endo-2	24084	7625.5	3831.5	0	21298.9	125.224	117.353	47.859	4467.43	133.962	1492.41	108.724	12241	1322.63	81.6539	486.019	1175.15	158.071	3268.62	1180.02	3789.36	880.192	2633.38	428.91	68.3077	5369.79	971.006	837.455	6.22885	-13.9775
Endo-2	24088	7627	6016.5	0	25546	186.337	58.4379	100.757	890.947	186.87	1355.74	82.7337	15030.5	1271.56	63.8698	4034.33	530.45	1336.66	1914.91	994.302	6621.34	809.503	871.325	364.29	41.4438	369.58	494.935	88.0059	8.57361	-14.5882
Endo-2	24114	7628.5	3797.5	0	23799.7	180.139	79.3982	122.343	3864.16	180.38	6363.44	171.028	26312.7	1617.74	28.5926	1218.87	698.898	445.481	6762.55	1611.78	4809.28	2510.37	1937.48	1169.81	97.1574	5484.1	442.574	3267.13	2.81555	-16.6549
Endo-2	24117	7633.5	10142.5	0	38952.5	100.577	319.429	546.601	3940.2	136.786	5939.8	142.268	21976.1	916.893	44.7917	1926.31	777.566	727.25	3837.99	324.464	4027.14	1220.7	1357.26	571.286	71.3036	1758.64	912.566	115.875	8.07993	-18.8103
Endo-2	24134	7638	3767	0	47429.6	134.371	113.73	99.3774	847.887	108.346	2011.61	94.0252	19384.3	1112.74	118.283	905.101	747.673	361.616	5456.2	1706.49	4732.52	1642.64	3278.36	581.44	91.2013	2796.77	786.83	2875.54	9.98922	-17.7818
Endo-2	24199	7658	4342	0	25910.2	73.8406	60.7971	50.3092	2297.38	93.8406	4236.04	103.792	16102.3	1118.29	91.6763	720.072	746.531	165.618	3809.26	1337.11	3829.97	1398.19	863.01	658.193	137.193	2721.96	736.42	315.971	3.51986	-15.2092
Endo-2	24223	7665.5	10469	0	34519.3	66.7831	68.0106	129.09	4030.98	119.217	3771.45	151.037	16396.5	731.952	33.1852	904.519	615.873	384.831	3160.48	734.46	2819.58	1219.95	1594.72	599.746	55.7249	2544.93	603.101	665	10.4529	-14.8092
Endo-2	24225	7669	2674	0	46149.2	119.744	10.7638	6.29146	2948.69	107.166	2.40704	71.7085	42626.4	1026.88	47.8342	1774.82	190.548	138.02	4356.74	2783.94	2779.26	2316.2	4358.8	161.407	70.5477	237.09	684.372	127.603	8.31517	-16.3126
Endo-2	24232	7667.5	3362	0	54088.5	106.258	124.05	101.031	2827.81	134.66	7229.91	94.5786	17298.2	1617.93	87.2893	832.635	520.17	258.082	7130.3	2241.43	4040.11	2194.81	1937.23	892.604	103.893	3199.14	752.843	141.836	7.75449	-20.2785
Endo-2	24236	7664	10482.5	0	34789.4	72.45	48.3643	125.236	3960.69	163.414	1720.84	195.479	15808.6	832.15	13.1357	832.021	706.7	279.786	3420.09	827.136	2924.43	1356.88	1850.55	727.836	78.6214	3333.79	615.579	258.493	10.4597	-14.8257
Endo-2	24265	7675	9058	0	28600.1	78.1319	54.2527	155.72	3544.33	191.011	6067.08	131.319	6229.5	1285.35	84.6154	364.28	439.308	141.159	2362.51	484.489	1714.59	1058.73	1202.64	444.39	66.1758	65.9615	530.934	1318.52	3.1882	-15.7177
Endo-2	24293	7680.5	3375	0	41410.7	121.02	66.6939	74.5102	3702.78	450.252	2595.97	319.68	29189.8	1261.65	72.7415	1034.36	460.395	283.095	7525.29	2085.26	4123.24	2702.61	2899.19	2374.99	414.816	2741.05	748.531	152.673	9.84229	-17.2414
Endo-2	24339	7695.5	10433	0	28676.2	96.3041	27.4055	12.6728	2196.53	108.041	692.641	168.318	11437.6	785.221	71.5253	317.912	468.912	113.111	1901.6	480.041	2634.57	826.028	531.309	843.152	119.028	571.751	336.184	313.323	9.1648	-11.0582
Endo-2	24341	7693.5	3747	0	49911.4	133.043	72.3597	74.6907	7824.42	83.8993	4026.46	75.7122	13089.9	1362.04	60.2806	537.389	808.547	300.691	6440.89	2266.4	4978.77	1360.77	2001.68	474.986	39.7986	3846.6	819.13	1704.94	10.1016	-17.975
Endo-2	24366	7699	1830	0	56135.9	156.534	0.670808	50.882	1498.84	102.019	143.876	115.503	40920	1275.75	111.429	889.298	473.609	220.944	2500.25	896.702	3925.71	2777.45	1000.33	388.006	88.8509	292.615	1186.71	1073.66	10.5711	-17.01
Endo-2	24426	7712.5	5994	0	45589.4	85.592	14.403	23.1891	684.313	87.9403	15.2587	84.393	11401.4	1432.51	61.005	1555.28	914.92	72.9552	1929.72	2037.2	1413.52	1861.34	2671.8	452.423	72.6567	3799.62	783.866	74.9204	10.0521	-16.053
Endo-2	24451	7720	5779	0	45594.4	72.1215	21.6495	15.5607	2317.4	125.481	5124.31	140.472	24596.2	1229.88	93.2664	1864.9	922.056	98.4019	4279.17	3535.69	5460.74	2041.39	4316.23	479.43	116.71	1001.16	910.215	221.729	8.74063	-18.4945
Endo-2	24471	7731	8825	0	18254.2	78.0772	9.54698	3.14765	3886.84	211.916	668.842	122.094	19108.9	1444.75	163.289	525.758	35007.8	2.18792	10887.1	1595.28	3032.3	2068.2	825.876	495.43	194.799	953.664	52116.8	195.406	12.5238	-7.91176
Endo-2	24496	7732	5759.5	0	44277.5	94.7602	4.76023	6.21053	3673.16	75.2047	2497.37	144.275	14465.4	1328.13	105.731	1080.36	983.807	95.3509	1911.23	1763.16	2695.23	1370.86	1995.05	335.058	115.018	314.538	760.76	234.737	10.0562	-16.2336
Endo-2	24526	7740	8767.5	0	10193.6	65.8802	1.77083	0.114583	2676.3	119.214	563.385	83.2812	10724.2	992.406	93.6094	108.745	13023	2.6875	4888.77	1300.94	1976.78	1241.3	1952.59	288.078	118.245	344.104	25657.2	73.8021	-3.70477	3.00619
Endo-2	24541	7748	2144	0	27939.5	77.5648	12.8342	0	1112.26	202.285	1564.72	113.482	31006.4	964.249	96.2901	436.56	539.098	64.3057	1055.88	352.233	1775.53	1979.07	64.4922	213.466	100.793	188.067	1544.44	1126.11	9.28163	-10.531
Endo-2	24544	7757.5	5399.5	0	35454.2	116.246	156.092	185.052	4505.74	177.859	9445.06	194.997	14280.5	1765.43	93.7607	1380.76	839.623	247.567	5413.18	2237.18	3757.36	2545.7	1188.55	739.777	113.974	1768.92	746.767	932.511	6.46535	-20.6939
Endo-2	24553	7750	5385.5	0	27788.3	85.8272	94.642	118.463	3503.68	97.7469	5681.48	87.8272	12714.2	1621.65	89.5	1351.35	741.728	247.84	3566.49	1461.77	2447.27	1700.3	849.265	379.839	68.6852	1087.86	625.506	413.858	2.78295	-15.4891
Endo-2	24568	7760	8814	0	9943.25	93.5441	3.09804	1.57353	5396.96	191.52	847.843	194.044	11888.9	1433.21	120.515	286.284	18186	1.2451	5983.89	864.196	1956.44	1159.17	794.255	596.358	170.534	461.912	40661.1	120.172	-0.377015	5.10554
Endo-2	24571	7752	6004	0	26394.7	105.639	291.583	222.148	5477.87	220.491	352.25	159.546	7654.76	1470.12	81.3148	1575.75	416.12	441.769	3656.26	2655.4	3756.52	1841.94	3355.11	1068.47	92.1389	2042.11	225.343	111.296	6.38998	-14.5444
Endo-2	24577	7756.5	6017.5	0	13973.2	73.2193	44.1765	163.016	3585.87	258.658	537.61	231.925	9561.45	1726.07	132.123	1085.04	141.904	226.273	1632.52	1826.34	3333.31	792.684	3067.88	1501.51	149.69	1096.67	111.064	98.6738	4.98445	-13.7718
Endo-2	24612	7769	3698	0	45911.2	76.8827	200.42	70.9753	3535.04	131.704	2685.81	76.0802	10631.9	1756.7	75.3457	384.006	627.099	165.667	5901.33	3049.39	4805.04	1926.2	1473.62	502.951	54.6296	344.278	842.333	477.661	9.83042	-17.7282
Endo-2	24614	7769	5960	0	45320.5	81.0429	27.2883	23.0245	2402.03	116.423	15.0736	132.239	8336.37	1483.46	149.883	1076.94	1480.27	145.509	5055.23	2969.94	2346.06	2404.82	6471.54	719.706	99.5951	3904.37	755.656	72.6503	6.58909	-16.3701
Endo-2	24635	7775	5152	0	50334.6	128.426	90.2407	30.3025	2462.94	148.37	3723.06	157.278	15793.7	1976.12	104.444	1389.62	780.605	312.309	10414.6	3278.23	5191.75	1774.58	3270.34	444.932	97.9012	337.796	747.994	764.778	9.19218	-18.7096
Endo-2	24642	7775	4355.5	0	35331	111.913	99.8116	139.348	3623.77	129.333	717.696	69.3913	10725.1	1159.84	59.5072	434.768	1821.29	68.029	2383.84	586.406	2745.07	621.493	491.754	303.783	133.913	612.246	664.797	78.9855	10.0923	-13.6541
Endo-2	24646	7781	4456	0	35336.3	52.465	76.1401	312.911	583.115	134.987	1194.78	94.0701	26954	1414.64	47.6242	855.025	738.338	143.204	2508.11	912.28	1517.92	1217.75	2241.09	586.688	63.2293	2883.88	735.943	977.637	9.19308	-14.3262
Endo-2	24649	7793	8918.5	0	22092.2	85.6878	44.0967	110.425	4897.2	137.522	663.334	168.533	8375.67	1364.33	99.0193	455.79	522.287	99.2873	3763.01	1246.57	3235.61	2647.39	2953.1	480.851	98.616	660.345	721.928	131.16	6.12613	-14.1649
Endo-2	24653	7781	5941.5	0	27006.3	88.2713	33.7287	46.4031	1842.33	110.24	40.4651	176.457	6153.6	1276.74	58.8062	1240.81	1409.57	258.077	2848.21	3099.4	1683.03	2392.36	5450.71	599.55	151.349	3151.15	638.194	107.93	6.07813	-15.6038
Endo-2	24656	7785.5	5170.5	0	52440.2	161.816	130.259	216.184	3145.34	207.695	4520.64	175.649	29267.2	2014.59	69.0345	2576.13	700.851	581.598	9375.14	2801.65	5436.96	2187.38	2450.3	520.615	57.8563	328.236	748.362	5589.81	5.21872	-20.3633
Endo-2	24675	7786	10186	0	23513	94.6463	35.9932	116.707	5017.48	79.4966	1318.05	151.844	20849.8	823.762	32.4694	842.871	339.252	238.864	2309.28	691.694	2497.95	641.898	1366.32	529.517	84.6395	1004.13	198.258	97.6191	7.78508	-10.8322
Endo-2	24690	7792.5	1803	0	13585.4	113.803	0.00854701	0.247863	12081.6	163.239	0.324786	186.197	14640.1	932.231	924.778	0	2243	0	7192.35	691.436	1684.52	1454.45	1.78632	382.786	82.0855	183.615	28785.9	123.222	-3.9372	4.62836
Endo-2	24702	7797.5	10523.5	0	3198.8	144.253	244.527	518.673	4076.18	203.213	5384.64	153.387	6982.93	874.153	54.2	661.04	5597.44	429.867	2569.78	419.52	1473.22	671.22	3499.19	619.353	66.3933	120.88	9373.67	5637.32	-4.75416	-15.4941
Endo-2	24714	7803.5	2170	0	47599.3	53.1824	94.4214	1004.08	2925.91	112.27	1460.77	167.226	47437.2	1707.47	103.057	1547.06	548.541	649.503	5653.14	1587.95	3101.45	4336.1	1570.32	785.648	143.195	350.962	1295.61	116.358	10.5587	-16.8485
Endo-2	24760	7819	3310	0	21305	52.7161	123.222	118.519	1089.38	212.321	4267.16	274.963	19700.6	970.593	113.728	468.617	310.21	176.136	3694.83	1357.62	1648.65	2390.88	2211.09	866.716	106.062	252.728	699.815	1662.8	1.41419	-13.0806
Endo-2	24773	7826	4174.5	0	41136.4	110.032	28.5325	36.4286	1220.4	68.961	111.922	124.188	19567.9	1206.27	88.9545	486.604	603.195	84.2922	2014.28	611.747	2044.97	887.39	510.513	258.682	110.227	481.818	706.883	95.8182	10.6824	-13.7947
Endo-2	24778	7827	4185.5	0	32944.2	101.441	54.3862	74.7862	2089.57	78.3517	343.635	139.979	10469.4	1270.99	93.7586	349.924	676.917	70.8414	2436.54	586.262	2022.28	763.924	899.428	367.683	109.531	485.393	631.497	103.255	9.8115	-12.6752
Endo-2	24780	7830.5	5424.5	0	35325.4	91.5499	128.949	140.423	3129.88	133.32	2496.43	143.19	14441.3	1569.51	105.586	1201.91	1058.55	190.897	3255.06	1225.21	2178.91	1421.09	1006.92	435.571	103.154	446.356	893.553	202.634	9.81251	-13.9435
Endo-2	24799	7835.5	1374.5	0	48533.5	76.2542	8.53672	51.5537	1012.47	135.876	0.700565	87.1469	32456.6	1797.18	102.006	655.768	418.729	105.492	3067.92	1738.16	2568.1	2477.44	1068.06	703.446	81.3446	767.938	885.746	62.8305	10.4651	-16.361
Endo-2	24806	7839	5257	0	20230.7	78.4611	33.4722	35.4944	2756.54	94.9111	3248.65	132.328	12397.6	1395.71	136.017	522.161	1238.14	77.0667	3165.15	1068.01	3080.68	522.528	1555.36	397.567	50.5556	183.411	862.411	1450.83	2.52022	-13.9806
Endo-2	24811	7834	3268.5	0	9724.19	199.455	138.333	119.472	6556.58	281.87	17834.3	173.382	22451.1	2372.74	229.87	587.268	595.081	254.715	3533.06	1196.13	3009.82	1623.86	1636.72	593.577	102.39	138.602	887.488	4876.17	-0.179902	-18.4554
Endo-2	24814	7840	5891	0	24751	65.8419	6.33023	0.688372	3012.65	127.488	75.7349	209.377	5526.69	1341.42	151.186	850.74	9210.34	9.57674	4000.58	1698.31	2354.29	1382.16	811.447	391.781	92.9395	1050.4	5937.85	169.349	9.32462	-10.8824
Endo-2	24842	7852	5368	0	36819.4	54.7394	7.26061	0.0727273	1111.88	79.7151	3.72121	135.455	18200	1103.76	41.7758	1094.64	847.564	11.4727	1495.75	710.024	1446.63	908.503	794.012	412.091	63.6727	116.915	663.6	75.9151	10.2497	-12.8996
Endo-2	24856	7856.5	10564	0	36603.9	174.413	86.7598	5.32961	5419.18	178.464	534.531	205.871	7643.62	1199.16	349.358	82.3296	42360.3	8.01676	16890.1	1994.9	3060.5	588.218	1173.48	633.279	174.207	648.218	51169.7	141.425	12.5251	-8.62944
Endo-2	24868	7856.5	5263	0	28816.2	75.5963	12.3761	59.4495	2224.91	90.3211	3650.93	160.615	16982.3	1296.8	86.7706	598.431	1001.69	66.0642	2920.74	1281.95	2288.27	793.917	2154.96	577.66	68.0917	210.606	1012.09	1713.31	6.99467	-13.3035
Endo-2	24912	7868.5	7457.5	0	48566.7	125.775	5.62252	25.2252	2878.08	158	165.934	100.623	21280.5	1241.79	118.536	1303.62	16103.1	15.8212	6315.73	1574.15	4516.48	1763.72	281.391	603.523	213.834	1200.64	16273.2	292.589	11.3242	-16.0443
Endo-2	24914	7870.5	4892.5	0	40046.7	51.4959	0	0.421488	1255.61	185.504	0.446281	83.3554	16575.4	568.273	83.1984	148.645	4425.7	0	3319.31	1525.64	2121.05	1595.82	511.802	355.521	82.6529	2079.55	4703.75	1237.45	11.1076	-13.7371
Endo-2	24921	7878.5	5286.5	0	20383.2	94.3571	22.218	10.7932	2001.71	80.6993	2865.85	109.575	21465.3	1165.44	94.0639	1230.15	1985.03	11.6617	3345.03	897.391	2611.14	1288.73	998.703	190.853	65.2669	231.105	6528.2	1124.83	2.60974	-13.8019
Endo-2	24959	7885	1416	0	36883.2	84.7059	154.529	33.0686	1698.68	131.294	4.12745	95.6274	24786.3	1536.46	77.9902	871.775	399.471	351.078	2359.24	848.941	2857.48	3134.12	2533.46	167.755	83.1078	674.078	947.569	104.451	9.5746	-15.7094
Endo-2	24962	7886.5	8931.5	0	17013.4	90.3707	3.36207	382.241	5863.47	229.284	1370.12	160.672	16409.6	1102.98	129.181	153.802	297.457	20.0603	3579.18	985.957	2900.97	1301.08	292.207	306.836	83.819	955.931	958.336	634.078	6.063	-10.7749
Endo-2	24964	7893.5	1418.5	0	19769.7	69.7843	31.1422	5.72059	6314.69	115.525	0.318627	71.2794	16015.3	1421.9	43.2745	151.681	312.951	26.7794	2730.87	748.912	3146.41	1455.77	546.578	119.897	51.8627	290.235	1350.05	97.7353	6.74154	-11.436
Endo-2	24998	7898	8933.5	0	16315.6	91.7826	1.06522	189.935	3969.79	227.174	2264.89	187.641	24227.6	1296.96	133.641	650.924	450.457	66.0761	2893.11	1288.52	2194.61	1771.85	1238.83	536.261	99.2065	1689.3	959.065	436.457	5.0168	-10.9135
Endo-2	25026	7920	9354.5	0	42924	120.265	16.5261	7.37826	2127.35	134.478	2342.57	179.787	15992.1	1232.54	64.9304	852.257	604.065	213.878	2987.89	819.813	3334.47	1636.72	639.443	456.352	116.183	2772.34	1034.42	200.561	10.4146	-16.1015
Endo-2	25037	7918	9387	0	11408.5	57.0099	215.604	115.822	2988.74	65.9406	7469.3	153.851	4417.1	1327.74	72.3366	717.485	247.386	568.505	2007.66	733.257	2342.88	600.921	2748.32	460.277	91.5743	627.347	154.891	119.545	-0.497918	-15.4194
Endo-2	25127	7954.5	2867.5	0	23684.5	120.963	5.69136	1.1358	4377.3	117.383	13230.4	144.778	14781.8	1266.46	73.7901	106.136	533.506	1.76543	4846.77	993.136	5348.54	2116.1	1689.64	215.494	66.6543	184.506	1373.09	1496.28	2.53837	-17.7097
Endo-2	25154	7966	7250.5	0	12604	104.294	288.711	222.606	3248.68	175.861	5289.02	203.017	20698.4	1826.89	72.0111	2901.16	481.556	747.411	2763.54	637.422	2405.61	1596.87	1025.69	890.122	130.428	173.417	389.544	1473.97	0.512684	-14.1674
Endo-2	25162	7968.5	2810.5	0	29000.6	76.8113	120.425	257.877	8931.25	198.811	6714.65	150.858	36631.1	1344.22	51.6698	758.349	914.491	110.009	7194.55	1635.47	2362.04	2563.2	741.962	533.264	125.792	154.226	2433.74	499.802	2.57974	-15.9146
Endo-2	25197	7982	3018.5	0	31811.3	70.716	155.243	526.953	2140.17	125.568	253.822	161.225	14272.6	1320.38	95.497	307.095	278.876	112.231	2990.17	1040.38	2044.13	1301.62	1015.55	324.669	90.5858	458.45	2225.76	97.3491	9.76864	-12.616
Endo-2	25203	7980.5	7252	0	14957.2	104.899	143.472	170.038	4681.14	200.824	10724.3	200.73	26058.4	1789.8	61.2075	3604.85	722.755	596.686	3493.69	874.767	3062.31	2028.65	1299.06	1042.95	133.057	180.648	596.61	3154.96	-0.213483	-16.9469
Endo-2	25205	7981	9371	0	45082.2	70.4396	124.923	109.386	2157.45	76.058	2563.56	121.546	29144.7	1150.44	66.5169	1383.1	382.502	596.01	2800.35	776.725	2773.65	2055.6	1766.04	342.01	65.657	1557.35	769.942	929.594	10.2171	-16.4458
Endo-2	25214	7980	2803	0	28914.4	98.1204	1.05556	1.15741	2744.02	200.481	158.426	192.824	35675.8	576.843	113.259	73.4815	1371.39	1.51852	2493.73	1001.4	2012.95	3093	8.75926	358.944	75.213	171.204	5701.19	234.074	10.1455	-10.7609
Endo-2	25230	7990	2738.5	0	28813.2	91.2844	0.0758294	94	2911.64	227.137	2472.46	153.351	35064.5	514.081	76.6919	41.0047	915.251	1.79621	4133.14	1110.53	2528.67	1952.68	667.417	76.3839	79.3412	825.692	3445.39	519.711	9.54724	-10.7276
Endo-2	25235	7987	7265.5	0	17484.4	89.6754	211.649	103.684	3166.61	176.553	11016.1	116.026	31003.1	1206.75	56.0439	3387.61	869.088	480.693	2335.71	682.123	2541.42	1725.74	932.763	575.798	97.7632	191.772	977.851	2512.98	-0.434902	-16.8084
Endo-2	25240	7988	2811	0	30798.5	75.3049	1.97561	8.97561	4079.11	327.415	191.89	232.817	39411.5	753.256	64.5732	94.561	2421.32	5.0122	3657.29	1241.51	2544.27	3758.54	9.86585	426.232	164.927	371.817	7792.43	206.159	10.3719	-11.0759
Endo-2	25242	7995	6972	0	37449.6	116.459	0	0	4170.09	269.418	0	126.073	51939.5	160.032	151.795	4193.85	36466.4	0	12145.6	3350.91	4420.03	3076.39	0.05	28.8182	103.723	734.605	30866.6	116.145	12.3659	-8.55638
Endo-2	25259	7994.5	10649.5	0	12015.9	92.408	6.768	2.656	2156.78	153.464	1860.07	148.432	24442.8	617.976	93.688	743.36	3301.68	57.376	2024.21	594.456	1687.29	1032.05	2566.19	674.68	151.08	307.704	19069.1	144.96	7.56524	-6.93486
Endo-2	25263	7992.5	2830.5	0	17478.2	93.7931	5.86207	252.747	2899.69	208.057	2935.4	279.782	33245.5	1566.09	51.092	377.345	1459.92	80.3333	3961.21	1555.71	2421.4	2753.68	783.414	113.69	74.5172	120.609	3760.62	212.724	2.8862	-12.8506
Endo-2	25285	8009	6813.5	0	36741.3	121.248	0	0	1188.41	220.222	0	147.35	47424.7	115.863	354.068	4988.46	2473.27	0	3423.75	2427.88	2734.48	3169.32	0.106838	100.423	124.761	1169.53	5053.98	1310.94	11.264	-12.1844
Endo-2	25312	8019.5	3268	0	35526.7	80.4115	45.2716	574.107	1800.79	122.189	3555.25	62.4444	11688.1	1092.28	74.4156	374.058	456.049	90.0288	1953.08	961.28	1763.81	483.453	875.93	328.786	56.0412	451.461	738.173	74.1852	10.0591	-13.1826
Endo-2	25318	8008.5	2998.5	0	32578.4	64.7957	1.5914	72.086	1588.74	96.0108	31.3333	106.806	14524.3	1431.97	91.129	106.323	84.4516	0.44086	3635.23	1364.08	1498.03	1758.3	788.548	188.011	169.355	236.914	692.527	117.14	9.91209	-12.4892
Endo-2	25322	8018.5	6851.5	0	35120.1	139.314	0	0	1920.5	268.059	0.273063	231.273	48836.4	124.188	755.683	4492.31	1797.03	0	3638	2039.2	2780.95	2720.15	21.155	25.1291	134.694	788.52	4332.99	2561.17	11.2547	-12.0848
Endo-2	25325	8012	6900	0	25502.3	51.6216	0	0	1735.45	117.847	0	132.586	38632.8	4.69369	189.568	2194.5	5674.5	0	3419.2	1586.88	1703.64	1336.99	17.1171	41.4054	91.2072	415.748	6196.77	492.865	8.98668	-8.96007
Endo-2	25333	8023	4231	0	41741.1	139.466	155.632	1304.93	2789.77	225.241	6463.34	95.2569	31618.8	1575.51	88.4822	574.874	914.486	67.8024	4478.09	2581.22	3148.34	2153.17	2991.25	492	116.96	1852.35	1322.08	2023.81	7.68129	-18.7867
Endo-2	25342	8023.5	8629	0	11773.6	96.0699	36.8656	41.6774	2959.22	171.414	1120.63	167.57	10505.5	1515.37	115.376	925.855	160.339	128.382	3602.27	662.376	2448.95	1016.32	1913.44	847.554	87.8548	123.941	614.35	108.312	1.51377	-10.2234
Endo-2	25348	8022.5	6005.5	0	23263.5	120.592	0	0	12538.9	209.138	0	60.5306	35148.5	744.893	323.102	2189.05	29278.3	0	13775.3	2981.26	3046.59	1008.45	0	24.2347	357.347	372.219	21363.1	629.668	12.2533	-8.28831
Endo-2	25351	8021	6022.5	0	26010.6	139.151	0	0	10184.7	292.389	0	98.2143	33626.7	747.611	432.262	1291.08	29809	0	18160.9	4249.83	3673.8	1190.83	0	79.2936	450.508	343.365	27154.1	190.325	12.356	-8.26147
Endo-2	25365	8029.5	10169.5	0	33831.1	84.2745	153.103	468.505	2789.39	118.206	580.451	102.74	6598.57	707.451	43.3873	551.711	726.392	338.564	2615.21	454.431	1699.35	566.157	2988.04	436.069	69.6961	755.784	614.833	90.2157	7.73378	-13.7756
Endo-2	25391	8035.5	4249	0	16429.6	152.588	92.1149	0.222973	2308.69	101.378	3689.47	150.689	27378.5	1536.26	120.554	403.77	1374.65	21.9122	4965.36	1700.45	3113.24	2107.32	2530.24	828.493	177.176	423.25	1325.78	2236.85	2.14302	-14.114
Endo-2	25400	8038	3649	0	19177.4	43.858	15.1914	37.1049	5245.58	132.586	23.321	138.451	21343.2	1619.97	74.4815	238.87	235.154	48.2593	4343.19	1451.2	2646.18	882.062	1489.11	779.376	118.809	321.074	569.025	87.1728	5.76179	-12.0424
Endo-2	25412	8044.5	3530.5	0	35496.9	69.3368	161.047	113.021	2111.97	147.057	100.508	102.736	24989.9	1354.27	67.2746	572.891	480.3	248.275	2259.99	698.461	2176.1	1153.06	759.86	421.508	121.244	930.834	791.705	292.648	10.0455	-13.2854
Endo-2	25415	8042.5	8631	0	9789.49	77.7778	123.765	202.954	4551.77	143.569	1523.24	164.314	12563.7	1796.85	103.843	1593.22	182.817	254.333	4262.18	715.261	2712.35	1014.14	2182.37	925.673	98.451	150.366	250.34	67.3399	-2.55045	-8.51391
Endo-2	25422	8051	6874	0	29729.6	114.195	0	0	1697.24	232.531	81.1837	126.945	41858	246.953	80.6647	2769.76	2140.82	0	3712	2206.26	2498.73	2461.88	97.5015	73.6822	85.863	346.924	4067.75	3812.85	11.2135	-11.9353
Endo-2	25438	8050.5	6896	0	34422.1	124.595	0	0	2720.88	315.804	44.3926	125.994	46300.6	519.749	111.19	3969.02	5104.84	0	4840.79	2268.98	3399.17	2536.09	139.405	136.399	163.613	446.497	7339.09	2891.69	11.2761	-12.1346
Endo-2	25445	8052.5	5993.5	0	17190.2	108.855	1.34884	0	3360.47	223.041	0	110.808	18548.8	616	380.227	58.686	30815.7	0	14768.8	3080.62	3722.33	821.372	2.02326	3.87791	236.826	266.558	20311.6	1279.48	12.2782	-8.1596
Endo-2	25479	8059.5	1025	0	32673.7	62.9579	86.9684	1182.44	1912.02	111.263	67.3579	148.716	54092	1573.16	115.747	7160.37	1119.88	318.884	1860.14	307.842	1702.86	1163.48	699.695	1353.18	209.958	100.716	1256.43	96.5368	8.85191	-12.9887
Endo-2	25487	8070.5	8853	0	19698.3	114.732	198.109	89.4153	5194.14	256.372	8003.97	285.852	11671.5	1952.66	63.0546	717.689	1010.78	221.158	6807.66	1264.22	3158.73	2184.02	5562.33	1294.86	177.071	137.322	1003.52	349.896	4.4284	-16.4173
Endo-2	25537	8083	8930.5	0	27336	53.9881	139.155	627.012	1931.11	218	4531.92	189.976	15561.5	1101.87	33.8691	1161.44	2355.33	181.988	945.964	896.393	1265.89	1398.55	1623.52	662.881	100.381	1467.94	745.726	149.131	3.12645	-15.0299
Endo-2	25556	8093	10325.5	0	26226.6	38.8061	4.52121	1.07879	830.63	67.0909	6895.78	46.8788	20389.7	415.503	44.9333	623.855	509.182	43.8121	1409.95	238.055	1813.28	1839.27	172.412	468.721	67.6848	215.812	752.279	1238.71	3.22985	-15.9449
Endo-2	25560	8089.5	7671	0	38586.7	204.167	0	0	4002.22	315.397	58.6026	150.218	33266	2200.63	245.667	1525.67	15674.2	0	5856.54	1608.65	3126.9	2903.77	418.782	931.295	324.782	411.782	21390	422.974	11.5917	-13.4195
Endo-2	25571	8094.5	3657	0	42375.9	66.8272	0	133.296	3763.41	362.185	131.111	268.901	19771.3	911.37	30.3827	55.2222	19.4938	21.0494	1514.54	1082.32	3153.77	1883.68	544.173	203.568	64.1111	957.395	176.704	135.198	11.1109	-14.4544
Endo-2	25581	8105.5	7658	0	23694.5	135.429	0	0	3205.8	139.333	53.2476	80.3095	17821.1	637.219	122.995	459.324	11678.4	0	4230.07	1416.55	2140.74	1073.28	435.681	284.314	151.348	162.61	18659.5	96.9762	10.3529	-9.87882
Endo-2	25582	8106.5	6865	0	47730	168.276	0	0	5080.78	422.558	0.358974	215.179	38614.3	1032.6	275.263	4943.06	27499	0	10317.3	2488.93	4478.83	3208.07	0	489.417	286.096	3031.78	14748.5	549.865	11.4362	-16.0119
Endo-2	25583	8110	1388	0	45979.5	299.168	0.889286	1013.8	6102.36	126.211	129.414	43.4071	27014.2	3488.18	194.704	263.2	549.125	73.8286	3868.65	1432.32	5470.81	3373.62	1012.2	1289.55	234.407	799.543	1383.95	85	9.7753	-18.9276
Endo-2	25584	8101	3012	0	22955.8	95.9028	283.472	1992.92	2940.39	304.333	1400.82	168.542	4027.99	1572.35	88.875	323.056	1110.6	229.389	2169.4	1229.86	2381.93	707.597	796.708	639.736	116.25	167.944	2655.08	23.7639	5.24735	-11.4779
Endo-2	25592	8116.5	7616.5	0	31615.1	112.205	0.637462	0.649547	1905.23	219.009	10.4532	182.831	16960	407.275	116.991	1232.78	3003.53	4.56495	2732.12	1330.3	2225.52	1083.15	894.414	515.103	114.556	232.858	6898.69	207.695	9.74492	-10.4033
Endo-2	25625	8118	4248.5	0	16974.4	112.392	203.5	382.9	5268.01	281.683	988.175	279.242	25515.1	2079.93	249.225	991.5	3726.45	290.117	7418.93	1524.12	3689.95	1642.83	973.542	1420.28	220.25	65.025	3894.01	3111.77	4.04163	-12.4159
Endo-2	25690	8138	2976.5	0	45062.8	120.655	15.6807	1525.76	3907.39	209.916	3047.81	191.092	25200.6	1303.62	79.0336	274.21	1640.42	53.0756	4005.05	1314.87	3456.64	1916.02	595.655	503.487	109.756	972.076	5161.16	1857.77	10.6769	-17.4209
Endo-2	25694	8140.5	10710	0	10564.3	52.2749	29.7836	61.5439	3478.56	72.5731	1685.41	19.4912	4450.05	519.374	118.813	186.38	1595.93	88.5322	3089.27	388.532	2033.53	509.076	789.813	472.439	75.4912	108.836	39023.5	343.374	-8.96878	8.9545
Endo-2	25695	8139	10683	0	13407.6	52.6379	37.977	151.138	3406.06	112.109	1353.96	38.2816	2207.89	374.954	67.8276	166.322	1097.48	146.828	1844.9	362.305	1597.79	397	1629.82	438.971	65.1264	102.333	19776.3	134.368	7.39813	-7.03073
Endo-2	25707	8146.5	4264.5	0	27938.2	75.2486	90.5763	806.757	3774.57	413.559	153.672	444.305	30212.1	1258.17	189.949	616.322	4991.98	262.774	4588.34	2248.91	2240.99	2289.96	4103.06	887.559	120.062	194.147	5984.22	977.124	6.44731	-14.8551
Endo-2	25708	8159.5	10212	0	52860.1	107.347	111.653	135.358	2006.55	89.6493	2325.93	35.5486	12849.9	572.715	114.688	1013.6	392.069	217.837	3690.57	739.84	5394.37	1847.81	1689.41	362.038	52.9236	2016.23	329.201	117.885	10.4724	-17.649
Endo-2	25711	8148	2980	0	44772	140.242	47.8849	2096.13	3857.11	176.079	3873.69	73.5758	30197.9	1177.22	109.145	428.988	1499.41	188.661	3628.33	1416.13	3655.27	2222.91	748.745	201.582	109.436	1160.25	4384.33	2471.04	10.7033	-17.5404
Endo-2	25715	8144	2971.5	0	50034	108.562	42.8315	1737.56	3232.08	104.213	4253.64	195.157	31795.2	1073.44	41.6854	301.629	1258.71	203.629	4099.08	1537.91	4027.29	2287.56	695.697	226.921	42.5281	1141.87	5750.43	2010.38	10.694	-17.6232
Endo-2	25717	8148	10654	0	40992.6	99.0746	83.796	153.945	1070.92	121.025	5793.7	39.8856	6961.81	465.597	69.5871	539.766	689.239	365.348	2108.8	767.846	2058.7	1451.52	2964.93	473.428	108.204	120.209	5630.41	1867.29	6.8783	-18.5626
Endo-2	25789	8170.5	11452.5	0	25355.8	148.011	3.4	1.76667	1377.42	169.667	7673.86	118.489	5397.68	465.578	80.2778	111.678	573.567	112.756	1673.28	373.722	1608.43	1209.73	1211.39	468.389	110.311	593.489	436.367	64.6111	3.08634	-15.9034
Endo-2	25803	8183	10644.5	0	18554.1	114.637	120.732	80.6191	3635.4	76.8036	7791.7	37.4345	10005.1	587.821	36.4702	851.559	721.28	393.798	2188.93	822.768	1954.71	1357.34	3755.69	405.339	51.0833	57.9167	718.941	2957.15	-0.214056	-16.4993
Endo-2	25812	8189.5	10210	0	42298.3	90.8757	138.559	76	1320.45	59.3107	1665.5	24.6723	14453.6	494.226	27.6102	1062.34	355.153	197.362	2289.84	325.006	4105.56	2244.54	598.113	318.661	63.3955	1374.04	169.74	108.672	10.9878	-15.1623
Endo-2	25827	8191	11265.5	0	17111.5	101.872	0.816667	0	2134.95	116.356	253.756	30.5778	10357.1	447.417	105.844	62.05	4419.14	16.3278	4203.48	625.294	2420.68	1282.19	491.606	390.156	50.0556	171.544	32670.6	67.2222	-3.64335	4.51781
Endo-2	25836	8192	11435.5	0	39573.5	118.031	248.025	383.893	1991.77	126.038	8789.84	72.3208	8222.44	771.566	56.4402	547.346	281.459	427.025	1630.18	533.333	2645.09	1007.23	1609.26	514.346	55.3522	1167.78	165.321	110.396	6.82528	-19.1484
Endo-2	25849	8196.5	8059.5	0	38547.2	89.3684	13.5789	32.9649	2975.83	119.237	144.693	106.64	17167.7	1106.09	52.2895	1492.33	1057.75	21.6404	3613.69	1698.55	3620.74	2226.84	2912.69	693.368	114.36	341.272	1389.61	163.193	9.50177	-16.1163
Endo-2	25858	8203.5	9761.5	0	35430.5	99.7175	81.9548	123.203	3315.36	120.831	4198.31	87.8757	5045.85	1358.28	16.5706	416.825	997.271	217.87	4036.69	895.294	3125.28	739.706	2392.93	549.717	108.379	6014.71	664.514	211.322	8.72878	-16.2773
Endo-2	25885	8216	8406.5	0	31429.7	115.592	6.87023	0	6598.77	247.351	2187.4	239.542	27021.2	1823.16	154.462	1152.95	30247.6	0	11747.6	1234.13	3308.82	2114.74	139.065	1465.05	287.5	902.027	38454.9	207.053	12.3489	-8.80857
Endo-2	25890	8206.5	8864	0	52157.3	126.152	12.697	816.288	2368.67	414.576	3625.39	273.318	20540.2	1657.14	78.5758	1523.94	102.894	95.3636	4062.08	4582.2	3168.91	3220.58	2393.41	707.682	253.303	4989.45	89.697	157.061	10.5141	-18.0521
Endo-2	25893	8207	8059	0	28889.7	72.3854	0	1.45833	2714.58	62.9688	4.44792	60.3125	14796.8	486.479	47.9271	508.667	364.365	0.104167	4191.5	3071.26	3330.68	2388.14	3647.84	160.823	49.0312	151.146	1342.99	197.24	6.96539	-14.378
Endo-2	25894	8212.5	10121	0	29337.6	95.9325	160.577	186.638	3105.29	73.2883	5592.85	70.7178	10527.2	956.982	38.6994	800.129	585.534	292.405	3347.14	576.429	1904.53	1140.49	1207.58	670.098	71.0123	257.067	263.356	121.54	3.41866	-15.7057
Endo-2	25895	8210.5	10141	0	22235.5	108.104	148.933	67.2519	3267.56	102.074	4128.64	44.0148	12222.2	868.43	503.296	936.837	508.941	221.97	2759.47	873.57	2827.3	1570.38	1741.19	579.963	106.556	522.03	3082.9	135.904	3.42115	-14.8617
Endo-2	25900	8208	7876	0	32732.4	153.832	0	0	2049.37	260.737	35.2211	249.926	28976.5	1268.28	168.232	1240.26	885.547	0.168421	2897.57	1636.79	2714.52	2889.66	1004.63	876.095	248.432	419.105	1299.96	74.5895	10.2092	-13.1998
Endo-2	25905	8210.5	8115.5	0	45466.1	77.3737	19.4848	6.88889	1146.25	118.313	355.717	233.97	14658.1	1225.86	49.404	952.929	364.535	60.9596	1698.87	888.98	2079.92	1490.77	2240.41	841.828	178.929	401.899	417.707	141.404	10.0669	-15.8297
Endo-2	25922	8225.5	8083	0	45174.6	98.2716	25.0991	3.09483	3872.83	170.306	848.181	186.414	16689.4	1173.62	57.3103	1212.24	495.069	69.4784	3753	1377.27	4024.45	1819.01	2173.85	568.879	184.401	427.345	1529.72	168.491	9.97391	-16.5916
[truncated: 25,924 more rows]

## Sheet: Fig 2F
WardHier__10_45_0	Object	PosX	PosY	PosZ	Ki67_Mean	Ch_PROM1_Mean	CDH1_Mean	CTNNB1_Mean	LC3_Mean	IGFBP7_Mean	tSNE_100__09_13_0	tSNE_100__09_13_1
[truncated: 9,104 more rows]

[truncated: 31 more sheets: Fig 2G-H, Fig 3B, Fig 3C DEG PapPC1, Fig 3C Pathways PapPC1, Fig 3C DEG DTL, Fig 3C Pathways DTL, Fig 3I, Fig 3J DEG Pseudobulk, Fig 3J Pathways Pseudobulk, Fig 3K, Fig 4B, Fig 4E, Figure 4-H, Fig 5B, Fig 5c, Fig 5F, Fig 6E, Fig 6F, Fig 7, Suppl Fig 1C …]
